# Supplementary material for: In Silico Assessment of the Lipid Fingerprint Signature of ATP2, the Essential P4-ATPase of Malaria Parasites
Source: Membranes (Basel). 2022 Jul 12;12(7):702. doi: 10.3390/membranes12070702 (PMC9325222; doi:10.3390/membranes12070702)
Supplement: Supplementary file 1 [file membranes-12-00702-s001.zip › Supplementary_Material_1(PcATP2_Consurff_grades).txt]

	 Amino Acid Conservation Scores
	=======================================

- POS: The position of the AA in the SEQRES derived sequence.
- SEQ: The SEQRES derived sequence in one letter code.
- 3LATOM: The ATOM derived sequence in three letter code, including the AA's positions as they appear in the PDB file and the chain identifier.
- SCORE: The normalized conservation scores.
- COLOR: The color scale representing the conservation scores (9 - conserved, 1 - variable).
- CONFIDENCE INTERVAL: When using the bayesian method for calculating rates, a confidence interval is assigned to each of the inferred evolutionary conservation scores.
- CONFIDENCE INTERVAL COLORS: When using the bayesian method for calculating rates. The color scale representing the lower and upper bounds of the confidence interval.
- MSA DATA: The number of aligned sequences having an amino acid (non-gapped) from the overall number of sequences at each position.
- RESIDUE VARIETY: The residues variety at each position of the multiple sequence alignment.

 POS	 SEQ	    3LATOM	SCORE		COLOR	CONFIDENCE INTERVAL	CONFIDENCE INTERVAL COLORS	MSA DATA	RESIDUE VARIETY
    	    	        	(normalized)	        	               
   1	   M	    MET1:P	-0.310		  7*	-0.909,-0.127			    9,6			    2/12	M
   2	   P	    PRO2:P	-0.270		  6*	-0.909,-0.012			    9,5			    2/12	P
   3	   K	    LYS3:P	-0.284		  7*	-0.909,-0.012			    9,5			    2/12	K
   4	   H	    HIS4:P	-0.306		  7*	-0.909,-0.127			    9,6			    2/12	H
   5	   I	    ILE5:P	 1.317		  1	 0.279, 2.082			    3,1			    9/12	F,I,L
   6	   K	    LYS6:P	-0.715		  9	-0.945,-0.636			    9,8			    9/12	K
   7	   G	    GLY7:P	-0.086		  5*	-0.636, 0.279			    8,3			    9/12	G,R
   8	   D	    ASP8:P	 0.076		  5*	-0.466, 0.468			    8,2			    9/12	N,K,D
   9	   N	    ASN9:P	-0.771		  9	-0.945,-0.723			    9,9			    9/12	N
  10	   V	   VAL10:P	 1.242		  1	 0.122, 2.082			    4,1			    9/12	N,D,E,V
  11	   E	   GLU11:P	 2.123		  1	 0.701, 3.932			    1,1			   10/12	G,Q,D,E
  12	   A	   ALA12:P	 1.209		  1	 0.279, 2.082			    3,1			   10/12	A,D,V,P
  13	   N	   ASN13:P	 1.046		  1	 0.122, 1.419			    4,1			   10/12	N,K,S,D
  14	   E	   GLU14:P	 0.999		  1*	-0.012, 1.419			    5,1			   10/12	E,D,G
  15	   T	   THR15:P	-0.386		  7	-0.760,-0.127			    9,6			   10/12	T,I
  16	   Q	   GLN16:P	 0.256		  4*	-0.396, 0.701			    7,1			   10/12	Q,R,K
  17	   I	   ILE17:P	-0.776		  9	-0.952,-0.723			    9,9			   10/12	I
  18	   S	   SER18:P	 0.081		  5*	-0.466, 0.468			    8,2			   10/12	S,R,N
  19	   I	   ILE19:P	-0.776		  9	-0.952,-0.723			    9,9			   10/12	I
  20	   N	   ASN20:P	-0.779		  9	-0.952,-0.723			    9,9			   10/12	N
  21	   G	   GLY21:P	 1.358		  1	 0.279, 2.082			    3,1			   10/12	S,K,G
  22	   V	   VAL22:P	 1.370		  1	 0.279, 2.082			    3,1			   10/12	P,V,Q,A,E
  23	   N	   ASN23:P	-0.779		  9	-0.952,-0.723			    9,9			   10/12	N
  24	   K	   LYS24:P	-0.725		  9	-0.945,-0.636			    9,8			   10/12	K
  25	   R	   ARG25:P	-0.278		  7*	-0.723,-0.012			    9,5			   10/12	K,R
  26	   R	   ARG26:P	 1.126		  1	 0.122, 1.419			    4,1			   10/12	R,T,H,G
  27	   H	   HIS27:P	-0.241		  6*	-0.723,-0.012			    9,5			   10/12	C,H
  28	   T	   THR28:P	-0.385		  7	-0.760,-0.127			    9,6			   10/12	N,T
  29	   N	   ASN29:P	-0.779		  9	-0.952,-0.723			    9,9			   10/12	N
  30	   S	   SER30:P	-0.795		  9	-0.952,-0.760			    9,9			   10/12	S
  31	   V	   VAL31:P	-0.772		  9	-0.952,-0.723			    9,9			   10/12	V
  32	   I	   ILE32:P	-0.776		  9	-0.952,-0.723			    9,9			   10/12	I
  33	   T	   THR33:P	-0.784		  9	-0.952,-0.723			    9,9			   10/12	T
  34	   S	   SER34:P	-0.795		  9	-0.952,-0.760			    9,9			   10/12	S
  35	   K	   LYS35:P	-0.725		  9	-0.945,-0.636			    9,8			   10/12	K
  36	   Y	   TYR36:P	-0.657		  9	-0.935,-0.586			    9,8			   10/12	Y
  37	   T	   THR37:P	-0.415		  7	-0.760,-0.229			    9,6			   10/12	T,N
  38	   I	   ILE38:P	-0.395		  7	-0.760,-0.229			    9,6			   10/12	I,V
  39	   F	   PHE39:P	 0.038		  5*	-0.636, 0.468			    8,2			   10/12	F,W
  40	   N	   ASN40:P	-0.779		  9	-0.952,-0.723			    9,9			   10/12	N
  41	   F	   PHE41:P	-0.667		  9	-0.945,-0.586			    9,8			   10/12	F
  42	   I	   ILE42:P	-0.776		  9	-0.952,-0.723			    9,9			   10/12	I
  43	   F	   PHE43:P	-0.667		  9	-0.945,-0.586			    9,8			   10/12	F
  44	   L	   LEU44:P	-0.089		  5*	-0.636, 0.279			    8,3			   10/12	F,L
  45	   N	   ASN45:P	-0.779		  9	-0.952,-0.723			    9,9			   10/12	N
  46	   A	   ALA46:P	 1.040		  1	 0.122, 1.419			    4,1			   10/12	I,V,A,M
  47	   Y	   TYR47:P	-0.657		  9	-0.935,-0.586			    9,8			   10/12	Y
  48	   E	   GLU48:P	-0.768		  9	-0.945,-0.723			    9,9			   11/12	E
  49	   Q	   GLN49:P	-0.359		  7	-0.760,-0.127			    9,6			   11/12	N,Q
  50	   F	   PHE50:P	-0.709		  9	-0.945,-0.636			    9,8			   11/12	F
  51	   H	   HIS51:P	-0.763		  9	-0.945,-0.682			    9,9			   10/12	H
  52	   K	   LYS52:P	-0.725		  9	-0.945,-0.636			    9,8			   10/12	K
  53	   I	   ILE53:P	-0.776		  9	-0.952,-0.723			    9,9			   10/12	I
  54	   S	   SER54:P	-0.795		  9	-0.952,-0.760			    9,9			   10/12	S
  55	   N	   ASN55:P	-0.779		  9	-0.952,-0.723			    9,9			   10/12	N
  56	   V	   VAL56:P	 0.049		  5*	-0.466, 0.468			    8,2			   10/12	I,V
  57	   Y	   TYR57:P	-0.657		  9	-0.935,-0.586			    9,8			   10/12	Y
  58	   F	   PHE58:P	-0.667		  9	-0.945,-0.586			    9,8			   10/12	F
  59	   F	   PHE59:P	-0.058		  5*	-0.636, 0.279			    8,3			   10/12	L,F
  60	   I	   ILE60:P	-0.230		  6*	-0.723,-0.012			    9,5			   10/12	I,F
  61	   I	   ILE61:P	-0.776		  9	-0.952,-0.723			    9,9			   10/12	I
  62	   G	   GLY62:P	-0.670		  9	-0.945,-0.586			    9,8			   10/12	G
  63	   V	   VAL63:P	-0.395		  7	-0.760,-0.229			    9,6			   10/12	V,I
  64	   L	   LEU64:P	-0.673		  9	-0.945,-0.586			    9,8			   10/12	L
  65	   Q	   GLN65:P	-0.750		  9	-0.945,-0.682			    9,9			   10/12	Q
  66	   L	   LEU66:P	 0.572		  2*	-0.229, 1.004			    6,1			   10/12	V,L,A
  67	   V	   VAL67:P	-0.186		  6*	-0.682, 0.122			    9,4			   10/12	V,I
  68	   P	   PRO68:P	-0.691		  9	-0.945,-0.586			    9,8			   10/12	P
  69	   E	   GLU69:P	 0.382		  3*	-0.317, 0.701			    7,1			   10/12	Q,E
  70	   L	   LEU70:P	-0.069		  5*	-0.636, 0.279			    8,3			   10/12	L,F
  71	   T	   THR71:P	-0.784		  9	-0.952,-0.723			    9,9			   10/12	T
  72	   A	   ALA72:P	-0.774		  9	-0.952,-0.723			    9,9			   10/12	A
  73	   T	   THR73:P	-0.784		  9	-0.952,-0.723			    9,9			   10/12	T
  74	   N	   ASN74:P	-0.779		  9	-0.952,-0.723			    9,9			   10/12	N
  75	   R	   ARG75:P	-0.154		  6*	-0.682, 0.122			    9,4			   10/12	R,G
  76	   I	   ILE76:P	 0.100		  4*	-0.466, 0.468			    8,2			   10/12	I,V,L
  77	   P	   PRO77:P	-0.691		  9	-0.945,-0.586			    9,8			   10/12	P
  78	   T	   THR78:P	-0.784		  9	-0.952,-0.723			    9,9			   10/12	T
  79	   I	   ILE79:P	-0.195		  6*	-0.682, 0.122			    9,4			   10/12	V,I
  80	   L	   LEU80:P	 0.128		  4*	-0.586, 0.468			    8,2			   10/12	L,F
  81	   F	   PHE81:P	-0.667		  9	-0.945,-0.586			    9,8			   10/12	F
  82	   P	   PRO82:P	-0.691		  9	-0.945,-0.586			    9,8			   10/12	P
  83	   L	   LEU83:P	-0.673		  9	-0.945,-0.586			    9,8			   10/12	L
  84	   S	   SER84:P	 0.272		  4*	-0.396, 0.701			    7,1			   10/12	S,T,L
  85	   I	   ILE85:P	-0.776		  9	-0.952,-0.723			    9,9			   10/12	I
  86	   V	   VAL86:P	-0.772		  9	-0.952,-0.723			    9,9			   10/12	V
  87	   L	   LEU87:P	-0.673		  9	-0.945,-0.586			    9,8			   10/12	L
  88	   I	   ILE88:P	 0.077		  5*	-0.466, 0.468			    8,2			   10/12	I,T,V
  89	   A	   ALA89:P	-0.774		  9	-0.952,-0.723			    9,9			   10/12	A
  90	   N	   ASN90:P	-0.779		  9	-0.952,-0.723			    9,9			   10/12	N
  91	   A	   ALA91:P	-0.774		  9	-0.952,-0.723			    9,9			   10/12	A
  92	   I	   ILE92:P	-0.776		  9	-0.952,-0.723			    9,9			   10/12	I
  93	   N	   ASN93:P	-0.278		  6*	-0.723,-0.012			    9,5			   10/12	K,N
  94	   D	   ASP94:P	-0.747		  9	-0.945,-0.682			    9,9			   10/12	D
  95	   A	   ALA95:P	-0.774		  9	-0.952,-0.723			    9,9			   10/12	A
  96	   Y	   TYR96:P	-0.047		  5*	-0.636, 0.279			    8,3			   10/12	Y,F
  97	   E	   GLU97:P	-0.731		  9	-0.945,-0.636			    9,8			   10/12	E
  98	   D	   ASP98:P	-0.747		  9	-0.945,-0.682			    9,9			   10/12	D
  99	   W	   TRP99:P	-0.535		  8	-0.923,-0.396			    9,7			   10/12	W
 100	   N	  ASN100:P	-0.779		  9	-0.952,-0.723			    9,9			   10/12	N
 101	   R	  ARG101:P	-0.746		  9	-0.945,-0.682			    9,9			   10/12	R
 102	   H	  HIS102:P	-0.763		  9	-0.945,-0.682			    9,9			   10/12	H
 103	   K	  LYS103:P	-0.233		  6*	-0.723,-0.012			    9,5			   10/12	R,K
 104	   T	  THR104:P	-0.784		  9	-0.952,-0.723			    9,9			   10/12	T
 105	   D	  ASP105:P	-0.747		  9	-0.945,-0.682			    9,9			   10/12	D
 106	   K	  LYS106:P	-0.725		  9	-0.945,-0.636			    9,8			   10/12	K
 107	   I	  ILE107:P	-0.776		  9	-0.952,-0.723			    9,9			   10/12	I
 108	   E	  GLU108:P	-0.731		  9	-0.945,-0.636			    9,8			   10/12	E
 109	   N	  ASN109:P	-0.779		  9	-0.952,-0.723			    9,9			   10/12	N
 110	   N	  ASN110:P	-0.779		  9	-0.952,-0.723			    9,9			   10/12	N
 111	   R	  ARG111:P	-0.746		  9	-0.945,-0.682			    9,9			   10/12	R
 112	   I	  ILE112:P	 0.512		  2*	-0.229, 1.004			    6,1			   10/12	M,V,I
 113	   C	  CYS113:P	-0.647		  8	-0.935,-0.529			    9,8			   10/12	C
 114	   Y	  TYR114:P	-0.048		  5*	-0.636, 0.279			    8,3			   10/12	Y,F
 115	   V	  VAL115:P	-0.772		  9	-0.952,-0.723			    9,9			   10/12	V
 116	   I	  ILE116:P	-0.378		  7	-0.760,-0.127			    9,6			   10/12	I,V
 117	   S	  SER117:P	 0.461		  3*	-0.229, 1.004			    6,1			   10/12	V,T,A,S
 118	   D	  ASP118:P	 0.897		  1	 0.122, 1.419			    4,1			   10/12	N,S,D
 119	   G	  GLY119:P	 1.891		  1	 0.701, 2.082			    1,1			   10/12	G,E,D,T
 120	   N	  ASN120:P	 0.759		  1*	-0.012, 1.419			    5,1			   10/12	Q,E,D,N
 121	   L	  LEU121:P	 1.738		  1	 0.468, 2.082			    2,1			   10/12	E,A,L,I,T
 122	   S	  SER122:P	-0.017		  5*	-0.529, 0.279			    8,3			   10/12	S,K,N
 123	   Q	  GLN123:P	 0.840		  1*	-0.012, 1.419			    5,1			   10/12	E,V,Q,K
 124	   P	  PRO124:P	 2.273		  1	 0.701, 3.932			    1,1			   10/12	D,E,I,P
 125	   N	  ASN125:P	 1.936		  1	 0.701, 3.932			    1,1			    9/12	T,I,E,N,Y
 126	   T	  THR126:P	 2.903		  1	 1.419, 3.932			    1,1			    9/12	E,Q,I,T,H,N
 127	   S	  SER127:P	 0.550		  2*	-0.127, 1.004			    6,1			   10/12	N,E,S
 128	   S	  SER128:P	 1.798		  1	 0.468, 2.082			    2,1			   10/12	S,T,C,K
 129	   N	  ASN129:P	 0.351		  3*	-0.229, 0.701			    6,1			   10/12	S,N,K
 130	   A	  ALA130:P	 2.853		  1	 1.419, 3.932			    1,1			   10/12	N,F,V,I,A
 131	   F	  PHE131:P	 3.172		  1	 1.419, 3.932			    1,1			   10/12	F,C,E,S,K
 132	   I	  ILE132:P	 1.037		  1	 0.122, 1.419			    4,1			   10/12	K,E,R,I
 133	   K	  LYS133:P	 1.094		  1	 0.122, 1.419			    4,1			   10/12	N,K,T,S
 134	   F	  PHE134:P	 0.355		  3*	-0.396, 0.701			    7,1			   10/12	I,F,K
 135	   L	  LEU135:P	 1.937		  1	 0.701, 3.932			    1,1			   10/12	S,L,I,F
 136	   R	  ARG136:P	 2.093		  1	 0.701, 3.932			    1,1			   10/12	R,Q,C,K
 137	   Y	  TYR137:P	 0.015		  5*	-0.586, 0.468			    8,2			   10/12	K,Y
 138	   I	  ILE138:P	 0.399		  3*	-0.317, 0.701			    7,1			   10/12	I,L
 139	   K	  LYS139:P	 0.548		  2*	-0.229, 1.004			    6,1			   10/12	K,W,R
 140	   K	  LYS140:P	 2.022		  1	 0.701, 3.932			    1,1			   10/12	R,S,N,K
 141	   L	  LEU141:P	 1.997		  1	 0.701, 3.932			    1,1			   10/12	Y,L,I,F
 142	   F	  PHE142:P	 0.764		  1*	-0.127, 1.419			    6,1			   10/12	L,F
 143	   P	  PRO143:P	 2.911		  1	 1.419, 3.932			    1,1			   10/12	P,F,V,T,I,M
 144	   Q	  GLN144:P	 1.302		  1	 0.279, 2.082			    3,1			   10/12	W,Q,R,G,K
 145	   K	  LYS145:P	 0.240		  4*	-0.396, 0.701			    7,1			   10/12	N,K
 146	   T	  THR146:P	 1.248		  1*	 0.122, 2.082			    4,1			    5/12	K,T,S
 147	   K	  LYS147:P	-0.247		  6*	-0.723,-0.012			    9,5			   10/12	K,R
 148	   K	  LYS148:P	-0.725		  9	-0.945,-0.636			    9,8			   10/12	K
 149	   I	  ILE149:P	 0.056		  5*	-0.466, 0.468			    8,2			   10/12	V,I
 150	   D	  ASP150:P	 1.566		  1	 0.279, 2.082			    3,1			   10/12	R,C,D,K
 151	   S	  SER151:P	 0.346		  3*	-0.317, 0.701			    7,1			   10/12	N,Y,S
 152	   I	  ILE152:P	 0.462		  3*	-0.229, 1.004			    6,1			   10/12	M,V,T,I
 153	   E	  GLU153:P	 0.232		  4*	-0.396, 0.701			    7,1			   10/12	D,E,N
 154	   S	  SER154:P	-0.191		  6*	-0.636, 0.122			    8,4			   11/12	N,S
 155	   Y	  TYR155:P	 1.335		  1	 0.279, 2.082			    3,1			   11/12	Y,N,S,L
 156	   Y	  TYR156:P	 0.949		  1*	-0.012, 1.419			    5,1			   11/12	Y,S,F,I
 157	   D	  ASP157:P	 0.072		  5*	-0.466, 0.468			    8,2			   11/12	D,G
 158	   D	  ASP158:P	 0.567		  2*	-0.127, 1.004			    6,1			   11/12	E,D
 159	   E	  GLU159:P	-0.047		  5*	-0.636, 0.279			    8,3			    5/12	E,D
 160	   N	  ASN160:P	 1.084		  1*	-0.229, 2.082			    6,1			    3/12	E,N
 161	   D	  ASP161:P	 0.790		  1*	-0.317, 1.419			    7,1			    3/12	D,E
 162	   E	  GLU162:P	 0.810		  1*	-0.317, 1.419			    7,1			    3/12	D,E
 163	   D	  ASP163:P	 0.790		  1*	-0.317, 1.419			    7,1			    3/12	E,D
 164	   I	  ILE164:P	 1.009		  1	 0.122, 1.419			    4,1			   11/12	D,V,I,T
 165	   D	  ASP165:P	 0.395		  3*	-0.229, 0.701			    6,1			   11/12	D,E,N
 166	   E	  GLU166:P	 0.063		  5*	-0.466, 0.468			    8,2			   11/12	K,E,D
 167	   I	  ILE167:P	-0.461		  7	-0.793,-0.317			    9,7			   11/12	R,I
 168	   A	  ALA168:P	-0.172		  6*	-0.586, 0.122			    8,4			   11/12	T,A,S
 169	   D	  ASP169:P	-0.782		  9	-0.952,-0.723			    9,9			   11/12	D
 170	   T	  THR170:P	-0.054		  5*	-0.529, 0.279			    8,3			   11/12	V,I,T
 171	   N	  ASN171:P	-0.489		  8	-0.793,-0.317			    9,7			   11/12	N,D
 172	   Y	  TYR172:P	 0.792		  1*	-0.012, 1.419			    5,1			   11/12	D,A,T,Y
 173	   F	  PHE173:P	-0.200		  6*	-0.682, 0.122			    9,4			   11/12	F,Y
 174	   M	  MET174:P	 0.691		  1*	-0.012, 1.004			    5,1			   11/12	V,I,M
 175	   R	  ARG175:P	 0.220		  4*	-0.317, 0.468			    7,2			   11/12	N,K,R,S
 176	   N	  ASN176:P	 0.191		  4*	-0.317, 0.468			    7,2			   11/12	N,T,S
 177	   Y	  TYR177:P	 0.949		  1*	-0.012, 1.419			    5,1			   11/12	F,C,Y
 178	   D	  ASP178:P	 0.283		  3*	-0.317, 0.701			    7,1			   11/12	D,E,A
 179	   D	  ASP179:P	-0.368		  7	-0.760,-0.127			    9,6			   11/12	D,G
 180	   K	  LYS180:P	 1.101		  1	 0.122, 1.419			    4,1			   11/12	S,R,N,K
 181	   L	  LEU181:P	 0.401		  3*	-0.317, 0.701			    7,1			   11/12	L,F
 182	   E	  GLU182:P	 0.104		  4*	-0.466, 0.468			    8,2			   11/12	G,D,E
 183	   N	  ASN183:P	 0.007		  5*	-0.529, 0.279			    8,3			   11/12	N,C,H
 184	   I	  ILE184:P	-0.493		  8	-0.793,-0.317			    9,7			   11/12	I,V
 185	   D	  ASP185:P	 1.734		  1	 0.468, 2.082			    2,1			   11/12	D,E,S,Y,N
 186	   G	  GLY186:P	-0.712		  9	-0.945,-0.636			    9,8			   11/12	G
 187	   T	  THR187:P	-0.167		  6*	-0.586, 0.122			    8,4			   11/12	I,T
 188	   I	  ILE188:P	 0.439		  3*	-0.229, 0.701			    6,1			   11/12	I,V,A
 189	   Q	  GLN189:P	-0.350		  7	-0.760,-0.127			    9,6			   11/12	Q,K
 190	   K	  LYS190:P	-0.762		  9	-0.945,-0.682			    9,9			   11/12	K
 191	   R	  ARG191:P	-0.781		  9	-0.952,-0.723			    9,9			   11/12	R
 192	   W	  TRP192:P	-0.582		  8	-0.935,-0.466			    9,8			   11/12	W
 193	   K	  LYS193:P	-0.762		  9	-0.945,-0.682			    9,9			   11/12	K
 194	   D	  ASP194:P	-0.782		  9	-0.952,-0.723			    9,9			   11/12	D
 195	   I	  ILE195:P	-0.484		  8	-0.793,-0.317			    9,7			   11/12	I,V
 196	   E	  GLU196:P	 0.425		  3*	-0.229, 0.701			    6,1			   11/12	T,E,K,N
 197	   V	  VAL197:P	-0.111		  6*	-0.586, 0.122			    8,4			   11/12	V,A
 198	   G	  GLY198:P	-0.712		  9	-0.945,-0.636			    9,8			   11/12	G
 199	   D	  ASP199:P	-0.782		  9	-0.952,-0.723			    9,9			   11/12	D
 200	   I	  ILE200:P	-0.807		  9	-0.952,-0.760			    9,9			   11/12	I
 201	   I	  ILE201:P	-0.807		  9	-0.952,-0.760			    9,9			   11/12	I
 202	   I	  ILE202:P	 0.244		  4*	-0.396, 0.701			    7,1			   11/12	I,F,L
 203	   C	  CYS203:P	-0.166		  6*	-0.682, 0.122			    9,4			   11/12	C,S
 204	   R	  ARG204:P	-0.781		  9	-0.952,-0.723			    9,9			   11/12	R
 205	   R	  ARG205:P	 0.738		  1*	-0.012, 1.419			    5,1			   11/12	N,K,R
 206	   S	  SER206:P	-0.824		  9	-0.952,-0.793			    9,9			   11/12	S
 207	   D	  ASP207:P	-0.378		  7	-0.760,-0.127			    9,6			   11/12	E,D
 208	   F	  PHE208:P	-0.709		  9	-0.945,-0.636			    9,8			   11/12	F
 209	   F	  PHE209:P	-0.709		  9	-0.945,-0.636			    9,8			   11/12	F
 210	   C	  CYS210:P	-0.691		  9	-0.945,-0.586			    9,8			   11/12	C
 211	   A	  ALA211:P	-0.806		  9	-0.952,-0.760			    9,9			   11/12	A
 212	   D	  ASP212:P	-0.782		  9	-0.952,-0.723			    9,9			   11/12	D
 213	   I	  ILE213:P	-0.807		  9	-0.952,-0.760			    9,9			   11/12	I
 214	   L	  LEU214:P	-0.715		  9	-0.945,-0.636			    9,8			   11/12	L
 215	   L	  LEU215:P	-0.212		  6*	-0.723, 0.122			    9,4			   11/12	L,V
 216	   L	  LEU216:P	-0.715		  9	-0.945,-0.636			    9,8			   11/12	L
 217	   S	  SER217:P	 0.561		  2*	-0.229, 1.004			    6,1			   11/12	C,S
 218	   S	  SER218:P	-0.514		  8	-0.822,-0.317			    9,7			   11/12	S,T
 219	   S	  SER219:P	-0.824		  9	-0.952,-0.793			    9,9			   11/12	S
 220	   D	  ASP220:P	-0.394		  7	-0.760,-0.229			    9,6			   11/12	D,H
 221	   P	  PRO221:P	 0.812		  1*	-0.012, 1.419			    5,1			   11/12	K,P,N,Q
 222	   N	  ASN222:P	-0.397		  7	-0.760,-0.229			    9,6			   11/12	C,N
 223	   G	  GLY223:P	-0.712		  9	-0.945,-0.636			    9,8			   11/12	G
 224	   I	  ILE224:P	-0.494		  8	-0.793,-0.317			    9,7			   11/12	V,I
 225	   C	  CYS225:P	-0.407		  7	-0.760,-0.229			    9,6			   11/12	A,C
 226	   F	  PHE226:P	-0.709		  9	-0.945,-0.636			    9,8			   11/12	F
 227	   A	  ALA227:P	-0.476		  8	-0.793,-0.317			    9,7			   11/12	A,V
 228	   E	  GLU228:P	-0.768		  9	-0.945,-0.723			    9,9			   11/12	E
 229	   T	  THR229:P	-0.815		  9	-0.952,-0.760			    9,9			   11/12	T
 230	   S	  SER230:P	-0.824		  9	-0.952,-0.793			    9,9			   11/12	S
 231	   S	  SER231:P	-0.824		  9	-0.952,-0.793			    9,9			   11/12	S
 232	   L	  LEU232:P	-0.715		  9	-0.945,-0.636			    9,8			   11/12	L
 233	   D	  ASP233:P	-0.782		  9	-0.952,-0.723			    9,9			   11/12	D
 234	   G	  GLY234:P	-0.712		  9	-0.945,-0.636			    9,8			   11/12	G
 235	   E	  GLU235:P	-0.768		  9	-0.945,-0.723			    9,9			   11/12	E
 236	   T	  THR236:P	-0.815		  9	-0.952,-0.760			    9,9			   11/12	T
 237	   N	  ASN237:P	-0.810		  9	-0.952,-0.760			    9,9			   11/12	N
 238	   L	  LEU238:P	-0.715		  9	-0.945,-0.636			    9,8			   11/12	L
 239	   K	  LYS239:P	-0.762		  9	-0.945,-0.682			    9,9			   11/12	K
 240	   V	  VAL240:P	-0.484		  8	-0.793,-0.317			    9,7			   11/12	I,V
 241	   K	  LYS241:P	-0.762		  9	-0.945,-0.682			    9,9			   11/12	K
 242	   E	  GLU242:P	-0.768		  9	-0.945,-0.723			    9,9			   11/12	E
 243	   V	  VAL243:P	-0.483		  8	-0.793,-0.317			    9,7			   11/12	A,V
 244	   N	  ASN244:P	-0.810		  9	-0.952,-0.760			    9,9			   11/12	N
 245	   K	  LYS245:P	 0.439		  3*	-0.317, 1.004			    7,1			   11/12	G,K,S
 246	   Y	  TYR246:P	-0.004		  5*	-0.586, 0.279			    8,3			   11/12	Y,F
 247	   I	  ILE247:P	 0.150		  4*	-0.466, 0.468			    8,2			   11/12	V,I,L
 248	   F	  PHE248:P	-0.709		  9	-0.945,-0.636			    9,8			   11/12	F
 249	   N	  ASN249:P	-0.810		  9	-0.952,-0.760			    9,9			   11/12	N
 250	   N	  ASN250:P	-0.014		  5*	-0.529, 0.279			    8,3			   11/12	L,I,N
 251	   L	  LEU251:P	-0.715		  9	-0.945,-0.636			    9,8			   11/12	L
 252	   T	  THR252:P	 0.519		  2*	-0.127, 1.004			    6,1			   11/12	G,S,Q,T
 253	   Y	  TYR253:P	 0.271		  4*	-0.317, 0.701			    7,1			   11/12	S,T,Y,N
 254	   N	  ASN254:P	-0.431		  7	-0.793,-0.229			    9,6			   11/12	N,D
 255	   I	  ILE255:P	 0.579		  2*	-0.127, 1.004			    6,1			   11/12	K,I,R
 256	   D	  ASP256:P	 2.289		  1	 1.004, 3.932			    1,1			   11/12	T,I,H,S,D,N,G
 257	   E	  GLU257:P	 0.701		  1*	-0.127, 1.004			    6,1			   11/12	K,E,I,Q
 258	   A	  ALA258:P	-0.482		  8	-0.793,-0.317			    9,7			   11/12	A,V
 259	   I	  ILE259:P	-0.151		  6*	-0.586, 0.122			    8,4			   11/12	I,V
 260	   E	  GLU260:P	 2.302		  1	 1.004, 3.932			    1,1			   11/12	R,Q,E,D
 261	   K	  LYS261:P	 0.044		  5*	-0.466, 0.279			    8,3			   11/12	R,K,N
 262	   V	  VAL262:P	 0.206		  4*	-0.317, 0.468			    7,2			   11/12	A,I,V
 263	   K	  LYS263:P	-0.762		  9	-0.945,-0.682			    9,9			   11/12	K
 264	   K	  LYS264:P	 1.570		  1	 0.468, 2.082			    2,1			   11/12	M,Q,N,K
 265	   L	  LEU265:P	-0.204		  6*	-0.682, 0.122			    9,4			   11/12	L,I
 266	   R	  ARG266:P	-0.363		  7	-0.760,-0.127			    9,6			   11/12	K,R
 267	   G	  GLY267:P	-0.712		  9	-0.945,-0.636			    9,8			   11/12	G
 268	   Y	  TYR268:P	-0.004		  5*	-0.586, 0.279			    8,3			   11/12	F,Y
 269	   I	  ILE269:P	-0.494		  8	-0.793,-0.317			    9,7			   11/12	I,V
 270	   L	  LEU270:P	-0.284		  7*	-0.723,-0.012			    9,5			   11/12	I,L
 271	   S	  SER271:P	-0.824		  9	-0.952,-0.793			    9,9			   11/12	S
 272	   E	  GLU272:P	-0.244		  6*	-0.723,-0.012			    9,5			   11/12	D,E
 273	   K	  LYS273:P	 0.085		  5*	-0.466, 0.468			    8,2			   11/12	I,K,N
 274	   P	  PRO274:P	-0.731		  9	-0.945,-0.636			    9,8			   11/12	P
 275	   N	  ASN275:P	-0.810		  9	-0.952,-0.760			    9,9			   11/12	N
 276	   K	  LYS276:P	-0.762		  9	-0.945,-0.682			    9,9			   11/12	K
 277	   N	  ASN277:P	-0.431		  7	-0.793,-0.229			    9,6			   11/12	D,N
 278	   L	  LEU278:P	-0.715		  9	-0.945,-0.636			    9,8			   11/12	L
 279	   S	  SER279:P	-0.206		  6	-0.636,-0.012			    8,5			   11/12	S,T
 280	   T	  THR280:P	-0.815		  9	-0.952,-0.760			    9,9			   11/12	T
 281	   M	  MET281:P	-0.457		  7	-0.793,-0.229			    9,6			   11/12	A,M
 282	   N	  ASN282:P	-0.202		  6*	-0.682, 0.122			    9,4			   11/12	Y,N
 283	   G	  GLY283:P	-0.712		  9	-0.945,-0.636			    9,8			   11/12	G
 284	   A	  ALA284:P	-0.506		  8	-0.822,-0.317			    9,7			   11/12	A,T
 285	   I	  ILE285:P	-0.807		  9	-0.952,-0.760			    9,9			   11/12	I
 286	   Y	  TYR286:P	-0.700		  9	-0.945,-0.636			    9,8			   11/12	Y
 287	   L	  LEU287:P	 0.650		  1*	-0.229, 1.004			    6,1			   11/12	L,F,Y
 288	   E	  GLU288:P	 0.067		  5*	-0.466, 0.468			    8,2			   11/12	E,Q,L
 289	   S	  SER289:P	-0.312		  7	-0.723,-0.127			    9,6			   11/12	S,K
 290	   D	  ASP290:P	 0.056		  5*	-0.466, 0.468			    8,2			   11/12	N,D,F
 291	   E	  GLU291:P	 1.421		  1	 0.279, 2.082			    3,1			   11/12	K,N,V,E
 292	   N	  ASN292:P	 1.274		  1	 0.279, 2.082			    3,1			   10/12	M,T,K,N
 293	   N	  ASN293:P	 2.282		  1	 1.004, 3.932			    1,1			   11/12	I,V,T,G,N
 294	   D	  ASP294:P	 0.380		  3*	-0.229, 0.701			    6,1			   11/12	D,N,G
 295	   L	  LEU295:P	 2.032		  1	 0.701, 3.932			    1,1			   11/12	L,V,I,N
 296	   T	  THR296:P	 3.395		  1	 2.082, 3.932			    1,1			   11/12	E,A,I,T,S,L,Q,K
 297	   N	  ASN297:P	 1.601		  1	 0.468, 2.082			    2,1			    8/12	N,S,C,F
 298	   N	  ASN298:P	 0.219		  4*	-0.317, 0.468			    7,2			   11/12	N,Y,D
 299	   K	  LYS299:P	 1.682		  1	 0.468, 2.082			    2,1			   11/12	T,I,D,K,N
 300	   E	  GLU300:P	 1.268		  1	 0.279, 2.082			    3,1			   11/12	N,G,E,D
 301	   L	  LEU301:P	 1.262		  1	 0.279, 2.082			    3,1			   11/12	M,I,L
 302	   R	  ARG302:P	 1.228		  1	 0.279, 2.082			    3,1			   11/12	R,Q,T,S,K,N
 303	   K	  LYS303:P	 0.089		  5*	-0.466, 0.468			    8,2			   11/12	E,K
 304	   S	  SER304:P	 1.165		  1	 0.279, 1.419			    3,1			   11/12	K,L,I,S
 305	   I	  ILE305:P	-0.252		  6*	-0.723,-0.012			    9,5			   11/12	I,L
 306	   S	  SER306:P	 0.149		  4*	-0.466, 0.468			    8,2			   11/12	Q,S,K
 307	   G	  GLY307:P	 2.264		  1	 0.701, 3.932			    1,1			   11/12	S,E,K,G
 308	   G	  GLY308:P	 0.036		  5*	-0.466, 0.279			    8,3			   11/12	T,N,G
 309	   T	  THR309:P	 0.181		  4*	-0.396, 0.468			    7,2			   11/12	T,A,S
 310	   S	  SER310:P	 0.220		  4*	-0.396, 0.701			    7,1			   11/12	N,E,S
 311	   H	  HIS311:P	 1.454		  1	 0.468, 2.082			    2,1			   11/12	H,L,Q,E,M
 312	   G	  GLY312:P	 0.804		  1*	-0.012, 1.419			    5,1			   11/12	G,R,V,I
 313	   E	  GLU313:P	-0.768		  9	-0.945,-0.723			    9,9			   11/12	E
 314	   G	  GLY314:P	 2.494		  1	 1.004, 3.932			    1,1			   11/12	E,S,L,G,Y,N
 315	   M	  MET315:P	 0.470		  2*	-0.229, 1.004			    6,1			   11/12	K,R,I,M
 316	   K	  LYS316:P	 0.579		  2*	-0.127, 1.004			    6,1			   11/12	E,R,K,N
 317	   N	  ASN317:P	 0.067		  5*	-0.466, 0.468			    8,2			   11/12	S,N,P
 318	   N	  ASN318:P	 0.209		  4*	-0.317, 0.468			    7,2			   11/12	G,N,S,H
 319	   N	  ASN319:P	 0.783		  1*	-0.012, 1.419			    5,1			   11/12	N,S,V,R,C
 320	   S	  SER320:P	 0.246		  4*	-0.317, 0.701			    7,1			   11/12	K,F,S,A
 321	   I	  ILE321:P	 0.071		  5*	-0.466, 0.468			    8,2			   11/12	A,V,I
 322	   E	  GLU322:P	 0.901		  1*	-0.012, 1.419			    5,1			   11/12	G,E,D,S
 323	   N	  ASN323:P	-0.225		  6	-0.636,-0.012			    8,5			   12/12	R,S,N
 324	   N	  ASN324:P	 2.200		  1	 0.701, 3.932			    1,1			   11/12	N,Y,K,M,T,I
 325	   S	  SER325:P	 1.536		  1	 0.468, 2.082			    2,1			   11/12	P,N,I,Q,D,S
 326	   N	  ASN326:P	 1.294		  1	 0.279, 2.082			    3,1			   11/12	S,D,E,I,N
 327	   D	  ASP327:P	 2.293		  1	 1.004, 3.932			    1,1			   11/12	S,E,D,C
 328	   N	  ASN328:P	 2.731		  1	 1.004, 3.932			    1,1			   11/12	R,W,D,S,N
 329	   L	  LEU329:P	 1.060		  1	 0.122, 1.419			    4,1			   11/12	I,F,T,L,M
 330	   D	  ASP330:P	 1.693		  1	 0.468, 2.082			    2,1			   11/12	N,Y,G,E,D
 331	   S	  SER331:P	 1.228		  1	 0.279, 2.082			    3,1			   11/12	S,E,T,Y
 332	   Y	  TYR332:P	 1.915		  1	 0.468, 3.932			    2,1			   11/12	L,Y,N
 333	   K	  LYS333:P	 0.882		  1	 0.122, 1.419			    4,1			   11/12	K,N,Q
 334	   N	  ASN334:P	 2.345		  1	 1.004, 3.932			    1,1			   11/12	H,E,S,K,N
 335	   D	  ASP335:P	 1.234		  1	 0.279, 2.082			    3,1			   11/12	N,E,D,A,T
 336	   D	  ASP336:P	-0.782		  9	-0.952,-0.723			    9,9			   11/12	D
 337	   K	  LYS337:P	-0.366		  7	-0.760,-0.127			    9,6			   11/12	N,K
 338	   Y	  TYR338:P	 0.346		  3*	-0.317, 0.701			    7,1			   11/12	H,F,Y
 339	   V	  VAL339:P	 1.057		  1	 0.122, 1.419			    4,1			   11/12	V,I,L
 340	   K	  LYS340:P	 0.541		  2*	-0.127, 1.004			    6,1			   11/12	R,S,K
 341	   L	  LEU341:P	-0.438		  7	-0.793,-0.229			    9,6			   11/12	I,L
 342	   P	  PRO342:P	-0.731		  9	-0.945,-0.636			    9,8			   11/12	P
 343	   F	  PHE343:P	-0.709		  9	-0.945,-0.636			    9,8			   11/12	F
 344	   D	  ASP344:P	-0.369		  7	-0.760,-0.127			    9,6			   11/12	D,G
 345	   E	  GLU345:P	-0.354		  7	-0.760,-0.127			    9,6			   11/12	S,E
 346	   K	  LYS346:P	-0.762		  9	-0.945,-0.682			    9,9			   11/12	K
 347	   N	  ASN347:P	 0.052		  5*	-0.529, 0.468			    8,2			   11/12	N,H,Q
 348	   F	  PHE348:P	-0.709		  9	-0.945,-0.636			    9,8			   11/12	F
 349	   V	  VAL349:P	-0.433		  7	-0.793,-0.229			    9,6			   11/12	L,V
 350	   L	  LEU350:P	-0.715		  9	-0.945,-0.636			    9,8			   11/12	L
 351	   R	  ARG351:P	-0.781		  9	-0.952,-0.723			    9,9			   11/12	R
 352	   G	  GLY352:P	-0.712		  9	-0.945,-0.636			    9,8			   11/12	G
 353	   C	  CYS353:P	-0.691		  9	-0.945,-0.586			    9,8			   11/12	C
 354	   K	  LYS354:P	-0.762		  9	-0.945,-0.682			    9,9			   11/12	K
 355	   L	  LEU355:P	-0.715		  9	-0.945,-0.636			    9,8			   11/12	L
 356	   K	  LYS356:P	-0.762		  9	-0.945,-0.682			    9,9			   11/12	K
 357	   N	  ASN357:P	-0.810		  9	-0.952,-0.760			    9,9			   11/12	N
 358	   I	  ILE358:P	-0.503		  8	-0.822,-0.317			    9,7			   11/12	I,T
 359	   D	  ASP359:P	-0.782		  9	-0.952,-0.723			    9,9			   11/12	D
 360	   W	  TRP360:P	-0.582		  8	-0.935,-0.466			    9,8			   11/12	W
 361	   V	  VAL361:P	-0.123		  6*	-0.586, 0.122			    8,4			   11/12	V,I
 362	   I	  ILE362:P	-0.147		  6*	-0.586, 0.122			    8,4			   11/12	M,V,I
 363	   G	  GLY363:P	-0.712		  9	-0.945,-0.636			    9,8			   11/12	G
 364	   M	  MET364:P	-0.473		  8	-0.793,-0.317			    9,7			   11/12	I,M
 365	   A	  ALA365:P	-0.476		  8	-0.793,-0.317			    9,7			   11/12	V,A
 366	   I	  ILE366:P	-0.807		  9	-0.952,-0.760			    9,9			   11/12	I
 367	   Y	  TYR367:P	-0.700		  9	-0.945,-0.636			    9,8			   11/12	Y
 368	   I	  ILE368:P	 0.255		  4*	-0.317, 0.701			    7,1			   11/12	V,T,I
 369	   G	  GLY369:P	-0.712		  9	-0.945,-0.636			    9,8			   11/12	G
 370	   K	  LYS370:P	 0.078		  5*	-0.466, 0.468			    8,2			   11/12	K,R
 371	   E	  GLU371:P	-0.768		  9	-0.945,-0.723			    9,9			   11/12	E
 372	   T	  THR372:P	-0.815		  9	-0.952,-0.760			    9,9			   11/12	T
 373	   K	  LYS373:P	-0.762		  9	-0.945,-0.682			    9,9			   11/12	K
 374	   I	  ILE374:P	-0.807		  9	-0.952,-0.760			    9,9			   11/12	I
 375	   Q	  GLN375:P	-0.785		  9	-0.952,-0.723			    9,9			   11/12	Q
 376	   M	  MET376:P	-0.801		  9	-0.952,-0.760			    9,9			   11/12	M
 377	   N	  ASN377:P	-0.810		  9	-0.952,-0.760			    9,9			   11/12	N
 378	   S	  SER378:P	-0.824		  9	-0.952,-0.793			    9,9			   11/12	S
 379	   L	  LEU379:P	 0.386		  3*	-0.229, 0.701			    6,1			   11/12	T,L,S
 380	   K	  LYS380:P	-0.322		  7	-0.760,-0.127			    9,6			   11/12	K,S
 381	   P	  PRO381:P	 0.191		  4*	-0.396, 0.468			    7,2			   11/12	P,S,A
 382	   V	  VAL382:P	-0.131		  6*	-0.586, 0.122			    8,4			   11/12	I,T,V
 383	   L	  LEU383:P	 0.559		  2*	-0.229, 1.004			    6,1			   11/12	K,I,R,L
 384	   K	  LYS384:P	-0.762		  9	-0.945,-0.682			    9,9			   11/12	K
 385	   Y	  TYR385:P	-0.422		  7	-0.793,-0.229			    9,6			   11/12	T,Y
 386	   S	  SER386:P	-0.824		  9	-0.952,-0.793			    9,9			   11/12	S
 387	   K	  LYS387:P	-0.360		  7	-0.760,-0.127			    9,6			   11/12	N,K
 388	   L	  LEU388:P	-0.715		  9	-0.945,-0.636			    9,8			   11/12	L
 389	   E	  GLU389:P	-0.768		  9	-0.945,-0.723			    9,9			   11/12	E
 390	   I	  ILE390:P	 0.335		  3*	-0.317, 0.701			    7,1			   11/12	K,M,I,R
 391	   L	  LEU391:P	-0.715		  9	-0.945,-0.636			    9,8			   11/12	L
 392	   T	  THR392:P	-0.815		  9	-0.952,-0.760			    9,9			   11/12	T
 393	   N	  ASN393:P	-0.810		  9	-0.952,-0.760			    9,9			   11/12	N
 394	   K	  LYS394:P	 0.571		  2*	-0.127, 1.004			    6,1			   11/12	K,R
 395	   L	  LEU395:P	-0.222		  6*	-0.723,-0.012			    9,5			   11/12	M,L
 396	   T	  THR396:P	-0.815		  9	-0.952,-0.760			    9,9			   11/12	T
 397	   I	  ILE397:P	-0.494		  8	-0.793,-0.317			    9,7			   11/12	V,I
 398	   I	  ILE398:P	-0.451		  7	-0.793,-0.229			    9,6			   11/12	L,I
 399	   I	  ILE399:P	-0.493		  8	-0.793,-0.317			    9,7			   11/12	V,I
 400	   W	  TRP400:P	-0.582		  8	-0.935,-0.466			    9,8			   11/12	W
 401	   L	  LEU401:P	 1.067		  1	 0.122, 1.419			    4,1			   11/12	F,V,L
 402	   I	  ILE402:P	-0.451		  7	-0.793,-0.229			    9,6			   11/12	L,I
 403	   Q	  GLN403:P	-0.785		  9	-0.952,-0.723			    9,9			   11/12	Q
 404	   V	  VAL404:P	-0.460		  7	-0.793,-0.317			    9,7			   11/12	V,M
 405	   F	  PHE405:P	-0.424		  7	-0.793,-0.229			    9,6			   11/12	F,I
 406	   M	  MET406:P	-0.141		  6*	-0.586, 0.122			    8,4			   11/12	M,V,I
 407	   C	  CYS407:P	-0.691		  9	-0.945,-0.586			    9,8			   11/12	C
 408	   I	  ILE408:P	 0.870		  1*	-0.012, 1.419			    5,1			   11/12	I,F,L
 409	   I	  ILE409:P	-0.489		  8	-0.793,-0.317			    9,7			   11/12	V,I
 410	   S	  SER410:P	-0.824		  9	-0.952,-0.793			    9,9			   11/12	S
 411	   A	  ALA411:P	-0.806		  9	-0.952,-0.760			    9,9			   11/12	A
 412	   Y	  TYR412:P	-0.700		  9	-0.945,-0.636			    9,8			   11/12	Y
 413	   Y	  TYR413:P	-0.700		  9	-0.945,-0.636			    9,8			   11/12	Y
 414	   S	  SER414:P	-0.509		  8	-0.822,-0.317			    9,7			   11/12	N,S
 415	   A	  ALA415:P	-0.806		  9	-0.952,-0.760			    9,9			   11/12	A
 416	   I	  ILE416:P	 0.698		  1*	-0.012, 1.004			    5,1			   11/12	V,I,M
 417	   I	  ILE417:P	-0.807		  9	-0.952,-0.760			    9,9			   11/12	I
 418	   V	  VAL418:P	-0.804		  9	-0.952,-0.760			    9,9			   11/12	V
 419	   S	  SER419:P	-0.824		  9	-0.952,-0.793			    9,9			   11/12	S
 420	   F	  PHE420:P	 0.934		  1*	-0.012, 1.419			    5,1			   11/12	F,L,M,S
 421	   S	  SER421:P	-0.824		  9	-0.952,-0.793			    9,9			   11/12	S
 422	   K	  LYS422:P	 0.636		  2*	-0.127, 1.004			    6,1			   11/12	T,R,I,K
 423	   K	  LYS423:P	-0.762		  9	-0.945,-0.682			    9,9			   11/12	K
 424	   S	  SER424:P	-0.119		  6*	-0.586, 0.122			    8,4			   11/12	S,K,N
 425	   K	  LYS425:P	-0.359		  7	-0.760,-0.127			    9,6			   11/12	R,K
 426	   F	  PHE426:P	 0.321		  3*	-0.396, 0.701			    7,1			   11/12	F,Y
 427	   K	  LYS427:P	 1.038		  1	 0.122, 1.419			    4,1			   11/12	I,R,P,K
 428	   Y	  TYR428:P	-0.700		  9	-0.945,-0.636			    9,8			   11/12	Y
 429	   L	  LEU429:P	-0.715		  9	-0.945,-0.636			    9,8			   11/12	L
 430	   P	  PRO430:P	-0.731		  9	-0.945,-0.636			    9,8			   11/12	P
 431	   F	  PHE431:P	-0.709		  9	-0.945,-0.636			    9,8			   11/12	F
 432	   N	  ASN432:P	-0.810		  9	-0.952,-0.760			    9,9			   11/12	N
 433	   L	  LEU433:P	-0.715		  9	-0.945,-0.636			    9,8			   11/12	L
 434	   V	  VAL434:P	 0.776		  1*	-0.012, 1.419			    5,1			   11/12	N,E,V,Q
 435	   E	  GLU435:P	 1.097		  1	 0.122, 1.419			    4,1			   11/12	K,Q,D,E
 436	   P	  PRO436:P	 1.169		  1	 0.279, 1.419			    3,1			   11/12	E,S,M,A,P
 437	   K	  LYS437:P	 0.060		  5*	-0.466, 0.468			    8,2			   11/12	K,R
 438	   A	  ALA438:P	 0.654		  1*	-0.127, 1.004			    6,1			   11/12	K,N,A,T
 439	   P	  PRO439:P	-0.731		  9	-0.945,-0.636			    9,8			   11/12	P
 440	   I	  ILE440:P	 1.460		  1	 0.279, 2.082			    3,1			   11/12	Y,I,F
 441	   V	  VAL441:P	 0.251		  4*	-0.317, 0.701			    7,1			   11/12	V,I,T
 442	   S	  SER442:P	-0.403		  7	-0.760,-0.229			    9,6			   11/12	V,S
 443	   G	  GLY443:P	-0.712		  9	-0.945,-0.636			    9,8			   11/12	G
 444	   I	  ILE444:P	 0.514		  2*	-0.127, 1.004			    6,1			   11/12	V,I
 445	   I	  ILE445:P	-0.484		  8	-0.793,-0.317			    9,7			   11/12	V,I
 446	   S	  SER446:P	-0.527		  8	-0.822,-0.396			    9,7			   11/12	A,S
 447	   F	  PHE447:P	-0.709		  9	-0.945,-0.636			    9,8			   11/12	F
 448	   F	  PHE448:P	-0.709		  9	-0.945,-0.636			    9,8			   11/12	F
 449	   S	  SER449:P	-0.824		  9	-0.952,-0.793			    9,9			   11/12	S
 450	   W	  TRP450:P	-0.582		  8	-0.935,-0.466			    9,8			   11/12	W
 451	   I	  ILE451:P	 0.106		  4*	-0.466, 0.468			    8,2			   11/12	I,V
 452	   V	  VAL452:P	-0.804		  9	-0.952,-0.760			    9,9			   11/12	V
 453	   I	  ILE453:P	-0.807		  9	-0.952,-0.760			    9,9			   11/12	I
 454	   T	  THR454:P	-0.815		  9	-0.952,-0.760			    9,9			   11/12	T
 455	   A	  ALA455:P	-0.394		  7	-0.760,-0.229			    9,6			   11/12	G,A
 456	   N	  ASN456:P	-0.810		  9	-0.952,-0.760			    9,9			   11/12	N
 457	   F	  PHE457:P	-0.709		  9	-0.945,-0.636			    9,8			   11/12	F
 458	   I	  ILE458:P	-0.364		  7	-0.760,-0.127			    9,6			   11/12	I,V
 459	   P	  PRO459:P	-0.731		  9	-0.945,-0.636			    9,8			   11/12	P
 460	   I	  ILE460:P	-0.807		  9	-0.952,-0.760			    9,9			   11/12	I
 461	   C	  CYS461:P	-0.398		  7	-0.760,-0.229			    9,6			   11/12	S,C
 462	   L	  LEU462:P	-0.715		  9	-0.945,-0.636			    9,8			   11/12	L
 463	   I	  ILE463:P	-0.807		  9	-0.952,-0.760			    9,9			   11/12	I
 464	   V	  VAL464:P	-0.804		  9	-0.952,-0.760			    9,9			   11/12	V
 465	   T	  THR465:P	-0.815		  9	-0.952,-0.760			    9,9			   11/12	T
 466	   M	  MET466:P	-0.801		  9	-0.952,-0.760			    9,9			   11/12	M
 467	   S	  SER467:P	-0.824		  9	-0.952,-0.793			    9,9			   11/12	S
 468	   C	  CYS468:P	-0.194		  6*	-0.682, 0.122			    9,4			   11/12	C,F
 469	   V	  VAL469:P	-0.804		  9	-0.952,-0.760			    9,9			   11/12	V
 470	   K	  LYS470:P	-0.762		  9	-0.945,-0.682			    9,9			   11/12	K
 471	   V	  VAL471:P	-0.804		  9	-0.952,-0.760			    9,9			   11/12	V
 472	   I	  ILE472:P	-0.410		  7	-0.760,-0.229			    9,6			   11/12	V,I
 473	   Q	  GLN473:P	-0.386		  7	-0.760,-0.127			    9,6			   11/12	L,Q
 474	   A	  ALA474:P	-0.806		  9	-0.952,-0.760			    9,9			   11/12	A
 475	   Y	  TYR475:P	-0.700		  9	-0.945,-0.636			    9,8			   11/12	Y
 476	   F	  PHE476:P	-0.709		  9	-0.945,-0.636			    9,8			   11/12	F
 477	   I	  ILE477:P	-0.807		  9	-0.952,-0.760			    9,9			   11/12	I
 478	   S	  SER478:P	-0.824		  9	-0.952,-0.793			    9,9			   11/12	S
 479	   C	  CYS479:P	-0.691		  9	-0.945,-0.586			    9,8			   11/12	C
 480	   D	  ASP480:P	-0.782		  9	-0.952,-0.723			    9,9			   11/12	D
 481	   N	  ASN481:P	 0.036		  5*	-0.529, 0.279			    8,3			   11/12	K,N,E
 482	   N	  ASN482:P	-0.810		  9	-0.952,-0.760			    9,9			   11/12	N
 483	   M	  MET483:P	-0.801		  9	-0.952,-0.760			    9,9			   11/12	M
 484	   I	  ILE484:P	-0.484		  8	-0.793,-0.317			    9,7			   11/12	V,I
 485	   Y	  TYR485:P	-0.429		  7	-0.793,-0.229			    9,6			   11/12	H,Y
 486	   K	  LYS486:P	-0.299		  7*	-0.723,-0.012			    9,5			   11/12	K,I
 487	   V	  VAL487:P	-0.804		  9	-0.952,-0.760			    9,9			   11/12	V
 488	   E	  GLU488:P	 1.144		  1	 0.279, 1.419			    3,1			   11/12	A,E,V,Q,L
 489	   E	  GLU489:P	 1.089		  1	 0.279, 1.419			    3,1			   11/12	I,V,T,A,E
 490	   N	  ASN490:P	-0.431		  7	-0.793,-0.229			    9,6			   11/12	N,D
 491	   I	  ILE491:P	 1.134		  1	 0.122, 1.419			    4,1			   11/12	V,I,H,N
 492	   P	  PRO492:P	-0.731		  9	-0.945,-0.636			    9,8			   11/12	P
 493	   S	  SER493:P	 0.019		  5*	-0.529, 0.279			    8,3			    9/12	P,S,T
 494	   F	  PHE494:P	 0.329		  3*	-0.396, 0.701			    7,1			   11/12	Y,F
 495	   G	  GLY495:P	 1.233		  1	 0.279, 2.082			    3,1			   11/12	G,T,V
 496	   E	  GLU496:P	 0.552		  2*	-0.229, 1.004			    6,1			   11/12	E,M,K
 497	   S	  SER497:P	 0.497		  2*	-0.229, 1.004			    6,1			   11/12	H,Q,D,S
 498	   R	  ARG498:P	 0.282		  3*	-0.396, 0.701			    7,1			   11/12	K,V,R
 499	   Q	  GLN499:P	-0.375		  7	-0.760,-0.127			    9,6			   11/12	E,Q
 500	   K	  LYS500:P	 1.155		  1	 0.279, 1.419			    3,1			   11/12	T,A,S,P,K
 501	   S	  SER501:P	 0.229		  4*	-0.317, 0.468			    7,2			   11/12	N,D,S,C
 502	   M	  MET502:P	 0.515		  2*	-0.229, 1.004			    6,1			   11/12	V,I,L,M
 503	   K	  LYS503:P	 0.517		  2*	-0.229, 1.004			    6,1			   11/12	E,R,Q,K
 504	   L	  LEU504:P	 2.877		  1	 1.419, 3.932			    1,1			   11/12	L,S,M,E,D,Y,K
 505	   K	  LYS505:P	 1.072		  1	 0.122, 1.419			    4,1			   11/12	E,D,R,K
 506	   K	  LYS506:P	 1.055		  1	 0.122, 1.419			    4,1			   11/12	I,E,K,N
 507	   N	  ASN507:P	 0.125		  4*	-0.396, 0.468			    7,2			   11/12	N,T,L,S
 508	   V	  VAL508:P	 2.824		  1	 1.419, 3.932			    1,1			   11/12	Y,Q,V,F,S
 509	   S	  SER509:P	 1.551		  1	 0.468, 2.082			    2,1			   11/12	D,E,S,C
 510	   I	  ILE510:P	 0.857		  1*	-0.012, 1.419			    5,1			   11/12	L,I,A,M
 511	   E	  GLU511:P	 0.657		  1*	-0.127, 1.004			    6,1			   11/12	S,D,E,N
 512	   I	  ILE512:P	 2.702		  1	 1.004, 3.932			    1,1			   12/12	M,E,V,I,N,P
 513	   D	  ASP513:P	 0.927		  1	 0.122, 1.419			    4,1			   12/12	V,R,D,K
 514	   E	  GLU514:P	 1.022		  1	 0.122, 1.419			    4,1			   12/12	Q,T,E,D
 515	   I	  ILE515:P	 2.852		  1	 1.419, 3.932			    1,1			   12/12	P,K,I,Q,T,W
 516	   H	  HIS516:P	 1.730		  1	 0.468, 2.082			    2,1			   12/12	G,K,N,H,R
 517	   N	  ASN517:P	 1.944		  1	 0.701, 2.082			    1,1			   12/12	N,K,A,Q,V
 518	   L	  LEU518:P	 3.551		  1	 2.082, 3.932			    1,1			   12/12	D,M,V,T,K,L,Q,R
 519	   S	  SER519:P	 0.384		  3*	-0.229, 0.701			    6,1			   12/12	N,Q,H,S
 520	   E	  GLU520:P	 1.936		  1	 0.701, 2.082			    1,1			   12/12	N,E,M,A,S,L
 521	   D	  ASP521:P	 2.096		  1	 0.701, 3.932			    1,1			    6/12	D,H,G
 522	   K	  LYS522:P	 1.918		  1	 0.468, 3.932			    2,1			    6/12	S,G,N,K
 523	   S	  SER523:P	 2.011		  1	 0.701, 3.932			    1,1			    7/12	N,Y,S,D,T
 524	   V	  VAL524:P	 1.887		  1	 0.468, 3.932			    2,1			    7/12	H,Q,V,M
 525	   F	  PHE525:P	 1.717		  1	 0.468, 2.082			    2,1			   10/12	M,L,V,F,T
 526	   V	  VAL526:P	 2.234		  1	 0.701, 3.932			    1,1			   11/12	L,V,D,S,G
 527	   T	  THR527:P	 1.815		  1	 0.468, 2.082			    2,1			    9/12	K,T,D,E,S
 528	   N	  ASN528:P	 2.849		  1	 1.419, 3.932			    1,1			    9/12	D,H,R,F,I,N
 529	   K	  LYS529:P	 1.613		  1	 0.468, 2.082			    2,1			    9/12	H,T,R,K,N
 530	   K	  LYS530:P	 1.415		  1	 0.468, 2.082			    2,1			   12/12	T,R,S,A,N,K
 531	   S	  SER531:P	 2.395		  1	 1.004, 3.932			    1,1			   12/12	F,I,S,Y,N,G
 532	   D	  ASP532:P	 1.811		  1	 0.468, 2.082			    2,1			   12/12	D,S,G,K,N
 533	   T	  THR533:P	 0.689		  1*	-0.012, 1.004			    5,1			   12/12	N,K,S,T
 534	   S	  SER534:P	 0.524		  2*	-0.127, 1.004			    6,1			   12/12	K,Y,N,S
 535	   I	  ILE535:P	 3.514		  1	 2.082, 3.932			    1,1			   12/12	K,S,F,L,N,P,A,T,I
 536	   S	  SER536:P	 0.625		  2*	-0.012, 1.004			    5,1			   12/12	S,Q,L,N
 537	   D	  ASP537:P	 1.611		  1	 0.468, 2.082			    2,1			   12/12	T,I,H,A,D,N
 538	   S	  SER538:P	 1.928		  1	 0.701, 3.932			    1,1			   12/12	S,T,Q,G,K
 539	   T	  THR539:P	 1.272		  1	 0.468, 2.082			    2,1			   12/12	D,E,S,Q,T,N
 540	   K	  LYS540:P	 0.870		  1*	-0.229, 1.419			    6,1			    4/12	K,V
 541	   I	  ILE541:P	 0.553		  2*	-0.466, 1.004			    8,1			    4/12	I,Y
 542	   I	  ILE542:P	 3.067		  1	 1.419, 3.932			    1,1			   12/12	N,T,I,M,K,L,R,F
 543	   P	  PRO543:P	 2.131		  1	 0.701, 3.932			    1,1			   12/12	N,P,E,Q,L
 544	   T	  THR544:P	 1.256		  1	 0.279, 2.082			    3,1			   12/12	G,N,S,T
 545	   S	  SER545:P	 0.271		  4*	-0.317, 0.701			    7,1			   12/12	N,S,D
 546	   E	  GLU546:P	 0.026		  5*	-0.466, 0.279			    8,3			   12/12	E,S,N
 547	   D	  ASP547:P	 0.744		  1*	-0.012, 1.004			    5,1			   12/12	N,I,S,D
 548	   E	  GLU548:P	 2.643		  1	 1.004, 3.932			    1,1			   12/12	S,L,P,E,D,A,I,T
 549	   N	  ASN549:P	 1.041		  1	 0.122, 1.419			    4,1			   12/12	G,N,S,M,T
 550	   N	  ASN550:P	 2.610		  1	 1.004, 3.932			    1,1			   12/12	T,Q,S,N,K,P
 551	   D	  ASP551:P	 1.448		  1	 0.468, 2.082			    2,1			   12/12	H,I,D,S,A,N
 552	   I	  ILE552:P	 0.807		  1*	-0.012, 1.419			    5,1			   12/12	P,E,V,I
 553	   L	  LEU553:P	 3.293		  1	 1.419, 3.932			    1,1			   12/12	P,T,V,K,F,R,Q,L
 554	   K	  LYS554:P	 0.127		  4*	-0.466, 0.468			    8,2			   12/12	R,S,K
 555	   K	  LYS555:P	 0.931		  1	 0.122, 1.419			    4,1			   12/12	E,T,R,N,K
 556	   R	  ARG556:P	 2.266		  1	 1.004, 3.932			    1,1			   12/12	Q,I,T,R,E,K,N
 557	   S	  SER557:P	 2.339		  1	 1.004, 3.932			    1,1			   12/12	T,L,H,S,K
 558	   T	  THR558:P	 0.173		  4*	-0.317, 0.468			    7,2			   12/12	S,A,T
 559	   R	  ARG559:P	-0.084		  5*	-0.529, 0.279			    8,3			   12/12	K,R
 560	   M	  MET560:P	 0.442		  3*	-0.229, 1.004			    6,1			   12/12	K,M,V,I
 561	   R	  ARG561:P	 0.982		  1	 0.122, 1.419			    4,1			   12/12	N,L,I,R,M
 562	   T	  THR562:P	 0.720		  1*	-0.012, 1.004			    5,1			   12/12	K,T,F,S
 563	   F	  PHE563:P	 0.764		  1*	-0.012, 1.419			    5,1			   12/12	Y,S,F,L
 564	   K	  LYS564:P	-0.397		  7	-0.760,-0.229			    9,6			   12/12	K,Q
 565	   D	  ASP565:P	 0.965		  1	 0.122, 1.419			    4,1			   12/12	S,D,E
 566	   S	  SER566:P	 2.804		  1	 1.419, 3.932			    1,1			   12/12	F,S,N,Y,P,I,V,A
 567	   K	  LYS567:P	-0.391		  7	-0.760,-0.229			    9,6			   12/12	K,R
 568	   E	  GLU568:P	-0.781		  9	-0.952,-0.723			    9,9			   12/12	E
 569	   K	  LYS569:P	-0.775		  9	-0.952,-0.723			    9,9			   12/12	K
 570	   N	  ASN570:P	-0.538		  8	-0.822,-0.396			    9,7			   12/12	N,S
 571	   Y	  TYR571:P	-0.215		  6*	-0.723, 0.122			    9,4			   12/12	C,Y
 572	   I	  ILE572:P	-0.819		  9	-0.952,-0.760			    9,9			   12/12	I
 573	   N	  ASN573:P	 1.396		  1	 0.279, 2.082			    3,1			   12/12	N,Y,T,S,D
 574	   F	  PHE574:P	-0.724		  9	-0.945,-0.636			    9,8			   12/12	F
 575	   N	  ASN575:P	-0.821		  9	-0.952,-0.793			    9,9			   12/12	N
 576	   A	  ALA576:P	-0.817		  9	-0.952,-0.760			    9,9			   12/12	A
 577	   I	  ILE577:P	-0.515		  8	-0.822,-0.317			    9,7			   12/12	I,V
 578	   P	  PRO578:P	-0.746		  9	-0.945,-0.682			    9,9			   12/12	P
 579	   R	  ARG579:P	-0.793		  9	-0.952,-0.723			    9,9			   12/12	R
 580	   T	  THR580:P	-0.825		  9	-0.952,-0.793			    9,9			   12/12	T
 581	   S	  SER581:P	-0.834		  9	-0.952,-0.793			    9,9			   12/12	S
 582	   S	  SER582:P	-0.834		  9	-0.952,-0.793			    9,9			   12/12	S
 583	   L	  LEU583:P	-0.730		  9	-0.945,-0.636			    9,8			   12/12	L
 584	   I	  ILE584:P	-0.819		  9	-0.952,-0.760			    9,9			   12/12	I
 585	   E	  GLU585:P	-0.781		  9	-0.952,-0.723			    9,9			   12/12	E
 586	   E	  GLU586:P	-0.781		  9	-0.952,-0.723			    9,9			   12/12	E
 587	   L	  LEU587:P	-0.730		  9	-0.945,-0.636			    9,8			   12/12	L
 588	   G	  GLY588:P	-0.727		  9	-0.945,-0.636			    9,8			   12/12	G
 589	   Q	  GLN589:P	-0.797		  9	-0.952,-0.760			    9,9			   12/12	Q
 590	   I	  ILE590:P	-0.819		  9	-0.952,-0.760			    9,9			   12/12	I
 591	   E	  GLU591:P	-0.781		  9	-0.952,-0.723			    9,9			   12/12	E
 592	   Y	  TYR592:P	-0.716		  9	-0.945,-0.636			    9,8			   12/12	Y
 593	   I	  ILE593:P	-0.819		  9	-0.952,-0.760			    9,9			   12/12	I
 594	   F	  PHE594:P	-0.724		  9	-0.945,-0.636			    9,8			   12/12	F
 595	   S	  SER595:P	-0.566		  8	-0.822,-0.396			    9,7			   12/12	S,T
 596	   D	  ASP596:P	-0.795		  9	-0.952,-0.760			    9,9			   12/12	D
 597	   K	  LYS597:P	-0.775		  9	-0.952,-0.723			    9,9			   12/12	K
 598	   T	  THR598:P	-0.825		  9	-0.952,-0.793			    9,9			   12/12	T
 599	   G	  GLY599:P	-0.727		  9	-0.945,-0.636			    9,8			   12/12	G
 600	   T	  THR600:P	-0.825		  9	-0.952,-0.793			    9,9			   12/12	T
 601	   L	  LEU601:P	-0.730		  9	-0.945,-0.636			    9,8			   12/12	L
 602	   T	  THR602:P	-0.825		  9	-0.952,-0.793			    9,9			   12/12	T
 603	   C	  CYS603:P	-0.202		  6*	-0.682, 0.122			    9,4			   12/12	R,C
 604	   N	  ASN604:P	-0.821		  9	-0.952,-0.793			    9,9			   12/12	N
 605	   V	  VAL605:P	-0.185		  6*	-0.586, 0.122			    8,4			   12/12	I,V
 606	   M	  MET606:P	-0.812		  9	-0.952,-0.760			    9,9			   12/12	M
 607	   E	  GLU607:P	-0.781		  9	-0.952,-0.723			    9,9			   12/12	E
 608	   F	  PHE608:P	-0.724		  9	-0.945,-0.636			    9,8			   12/12	F
 609	   R	  ARG609:P	-0.439		  7	-0.793,-0.229			    9,6			   12/12	K,R
 610	   K	  LYS610:P	-0.775		  9	-0.952,-0.723			    9,9			   12/12	K
 611	   C	  CYS611:P	-0.707		  9	-0.945,-0.636			    9,8			   12/12	C
 612	   A	  ALA612:P	-0.518		  8	-0.822,-0.317			    9,7			   12/12	V,A
 613	   I	  ILE613:P	 0.118		  4*	-0.396, 0.468			    7,2			   12/12	V,I
 614	   N	  ASN614:P	-0.821		  9	-0.952,-0.793			    9,9			   12/12	N
 615	   G	  GLY615:P	-0.727		  9	-0.945,-0.636			    9,8			   12/12	G
 616	   I	  ILE616:P	-0.819		  9	-0.952,-0.760			    9,9			   12/12	I
 617	   S	  SER617:P	-0.834		  9	-0.952,-0.793			    9,9			   12/12	S
 618	   Y	  TYR618:P	-0.716		  9	-0.945,-0.636			    9,8			   12/12	Y
 619	   G	  GLY619:P	-0.727		  9	-0.945,-0.636			    9,8			   12/12	G
 620	   T	  THR620:P	-0.029		  5*	-0.529, 0.279			    8,3			   12/12	T,K,N
 621	   G	  GLY621:P	-0.727		  9	-0.945,-0.636			    9,8			   12/12	G
 622	   L	  LEU622:P	-0.730		  9	-0.945,-0.636			    9,8			   12/12	L
 623	   T	  THR623:P	-0.825		  9	-0.952,-0.793			    9,9			   12/12	T
 624	   E	  GLU624:P	-0.781		  9	-0.952,-0.723			    9,9			   12/12	E
 625	   I	  ILE625:P	-0.819		  9	-0.952,-0.760			    9,9			   12/12	I
 626	   K	  LYS626:P	-0.775		  9	-0.952,-0.723			    9,9			   12/12	K
 627	   R	  ARG627:P	 0.009		  5*	-0.529, 0.279			    8,3			   12/12	R,K
 628	   K	  LYS628:P	-0.190		  6*	-0.586, 0.122			    8,4			   12/12	H,N,K
 629	   I	  ILE629:P	-0.819		  9	-0.952,-0.760			    9,9			   12/12	I
 630	   L	  LEU630:P	-0.270		  6*	-0.723,-0.012			    9,5			   12/12	L,M
 631	   I	  ILE631:P	-0.388		  7	-0.760,-0.229			    9,6			   12/12	K,I
 632	   K	  LYS632:P	-0.775		  9	-0.952,-0.723			    9,9			   12/12	K
 633	   N	  ASN633:P	-0.045		  5*	-0.529, 0.279			    8,3			   12/12	K,N,R
 634	   N	  ASN634:P	-0.821		  9	-0.952,-0.793			    9,9			   12/12	N
 635	   I	  ILE635:P	 0.608		  2*	-0.127, 1.004			    6,1			   12/12	I,L,M
 636	   P	  PRO636:P	 0.951		  1	 0.122, 1.419			    4,1			   12/12	I,E,A,P
 637	   I	  ILE637:P	-0.819		  9	-0.952,-0.760			    9,9			   12/12	I
 638	   P	  PRO638:P	-0.746		  9	-0.945,-0.682			    9,9			   12/12	P
 639	   P	  PRO639:P	 1.374		  1	 0.279, 2.082			    3,1			   12/12	P,E,D,V,Q
 640	   E	  GLU640:P	-0.781		  9	-0.952,-0.723			    9,9			   12/12	E
 641	   P	  PRO641:P	-0.746		  9	-0.945,-0.682			    9,9			   12/12	P
 642	   V	  VAL642:P	 0.318		  3*	-0.317, 0.701			    7,1			   12/12	L,I,T,V
 643	   D	  ASP643:P	-0.390		  7*	-0.923,-0.229			    9,6			    3/12	D
 644	   L	  LEU644:P	 1.358		  1	 0.468, 2.082			    2,1			   12/12	L,I,V,A,M
 645	   D	  ASP645:P	 0.684		  1*	-0.127, 1.004			    6,1			   12/12	K,D,Q,T
 646	   I	  ILE646:P	 0.790		  1*	-0.012, 1.419			    5,1			   12/12	S,V,I,F,P
 647	   K	  LYS647:P	 0.586		  2*	-0.127, 1.004			    6,1			   12/12	N,K,T,H
 648	   N	  ASN648:P	 1.225		  1	 0.279, 2.082			    3,1			   12/12	H,I,E,K,N
 649	   K	  LYS649:P	-0.400		  7	-0.760,-0.229			    9,6			   12/12	K,R
 650	   T	  THR650:P	-0.825		  9	-0.952,-0.793			    9,9			   12/12	T
 651	   P	  PRO651:P	-0.316		  7	-0.723,-0.127			    9,6			   12/12	S,P
 652	   N	  ASN652:P	-0.031		  5*	-0.529, 0.279			    8,3			   12/12	F,H,N
 653	   V	  VAL653:P	-0.815		  9	-0.952,-0.760			    9,9			   12/12	V
 654	   N	  ASN654:P	-0.821		  9	-0.952,-0.793			    9,9			   12/12	N
 655	   I	  ILE655:P	-0.819		  9	-0.952,-0.760			    9,9			   12/12	I
 656	   I	  ILE656:P	-0.103		  6*	-0.586, 0.122			    8,4			   12/12	I,V
 657	   D	  ASP657:P	-0.795		  9	-0.952,-0.760			    9,9			   12/12	D
 658	   K	  LYS658:P	 2.461		  1	 1.004, 3.932			    1,1			   12/12	N,K,G,A,S,E
 659	   K	  LYS659:P	 0.465		  2*	-0.229, 1.004			    6,1			   12/12	K,N,E,D
 660	   L	  LEU660:P	-0.258		  6*	-0.723,-0.012			    9,5			   12/12	I,L
 661	   V	  VAL661:P	 0.236		  4*	-0.317, 0.701			    7,1			   12/12	L,I,V,E
 662	   D	  ASP662:P	 0.133		  4*	-0.396, 0.468			    7,2			   12/12	K,N,D
 663	   H	  HIS663:P	-0.018		  5*	-0.529, 0.279			    8,3			   12/12	A,H,Q
 664	   L	  LEU664:P	-0.730		  9	-0.945,-0.636			    9,8			   12/12	L
 665	   K	  LYS665:P	 0.185		  4*	-0.466, 0.468			    8,2			   12/12	K,H
 666	   D	  ASP666:P	-0.463		  7	-0.793,-0.317			    9,7			   12/12	N,D
 667	   V	  VAL667:P	 0.363		  3*	-0.317, 0.701			    7,1			   12/12	I,V,P
 668	   N	  ASN668:P	-0.536		  8	-0.822,-0.396			    9,7			   12/12	T,N
 669	   H	  HIS669:P	-0.808		  9	-0.952,-0.760			    9,9			   12/12	H
 670	   F	  PHE670:P	-0.724		  9	-0.945,-0.636			    9,8			   12/12	F
 671	   N	  ASN671:P	-0.821		  9	-0.952,-0.793			    9,9			   12/12	N
 672	   H	  HIS672:P	-0.808		  9	-0.952,-0.760			    9,9			   12/12	H
 673	   A	  ALA673:P	 0.630		  2*	-0.012, 1.004			    5,1			   12/12	P,E,A,V
 674	   S	  SER674:P	 0.601		  2*	-0.127, 1.004			    6,1			   12/12	N,A,S,F,H
 675	   L	  LEU675:P	 0.750		  1*	-0.012, 1.419			    5,1			   12/12	V,I,L
 676	   I	  ILE676:P	-0.819		  9	-0.952,-0.760			    9,9			   12/12	I
 677	   Y	  TYR677:P	 0.841		  1*	-0.012, 1.419			    5,1			   12/12	S,Y,N,G
 678	   F	  PHE678:P	-0.724		  9	-0.945,-0.636			    9,8			   12/12	F
 679	   F	  PHE679:P	-0.724		  9	-0.945,-0.636			    9,8			   12/12	F
 680	   L	  LEU680:P	-0.259		  6*	-0.723,-0.012			    9,5			   12/12	L,V
 681	   H	  HIS681:P	-0.808		  9	-0.952,-0.760			    9,9			   12/12	H
 682	   L	  LEU682:P	-0.730		  9	-0.945,-0.636			    9,8			   12/12	L
 683	   A	  ALA683:P	-0.817		  9	-0.952,-0.760			    9,9			   12/12	A
 684	   V	  VAL684:P	-0.525		  8	-0.822,-0.396			    9,7			   12/12	V,I
 685	   N	  ASN685:P	-0.821		  9	-0.952,-0.793			    9,9			   12/12	N
 686	   H	  HIS686:P	-0.808		  9	-0.952,-0.760			    9,9			   12/12	H
 687	   C	  CYS687:P	 0.127		  4*	-0.396, 0.468			    7,2			   12/12	S,A,C
 688	   V	  VAL688:P	-0.815		  9	-0.952,-0.760			    9,9			   12/12	V
 689	   M	  MET689:P	-0.511		  8	-0.822,-0.317			    9,7			   12/12	M,I
 690	   C	  CYS690:P	-0.707		  9	-0.945,-0.636			    9,8			   12/12	C
 691	   D	  ASP691:P	-0.357		  7	-0.760,-0.127			    9,6			   12/12	E,D
 692	   T	  THR692:P	 1.037		  1	 0.122, 1.419			    4,1			   12/12	Y,K,N,R,T
 693	   S	  SER693:P	 2.241		  1	 1.004, 3.932			    1,1			   12/12	A,S,D,N,G
 694	   D	  ASP694:P	 1.180		  1	 0.279, 1.419			    3,1			   12/12	K,N,D,S
 695	   D	  ASP695:P	 1.276		  1	 0.279, 2.082			    3,1			   12/12	N,E,D
 696	   V	  VAL696:P	 0.212		  4*	-0.396, 0.468			    7,2			   12/12	M,T,V,I
 697	   N	  ASN697:P	 0.168		  4*	-0.396, 0.468			    7,2			   12/12	T,S,N
 698	   A	  ALA698:P	-0.550		  8	-0.822,-0.396			    9,7			   12/12	A,T
 699	   Y	  TYR699:P	-0.716		  9	-0.945,-0.636			    9,8			   12/12	Y
 700	   S	  SER700:P	-0.566		  8	-0.822,-0.396			    9,7			   12/12	S,T
 701	   S	  SER701:P	-0.834		  9	-0.952,-0.793			    9,9			   12/12	S
 702	   S	  SER702:P	-0.834		  9	-0.952,-0.793			    9,9			   12/12	S
 703	   S	  SER703:P	-0.834		  9	-0.952,-0.793			    9,9			   12/12	S
 704	   P	  PRO704:P	-0.746		  9	-0.945,-0.682			    9,9			   12/12	P
 705	   D	  ASP705:P	-0.795		  9	-0.952,-0.760			    9,9			   12/12	D
 706	   E	  GLU706:P	-0.781		  9	-0.952,-0.723			    9,9			   12/12	E
 707	   E	  GLU707:P	-0.781		  9	-0.952,-0.723			    9,9			   12/12	E
 708	   A	  ALA708:P	-0.817		  9	-0.952,-0.760			    9,9			   12/12	A
 709	   L	  LEU709:P	-0.730		  9	-0.945,-0.636			    9,8			   12/12	L
 710	   V	  VAL710:P	-0.815		  9	-0.952,-0.760			    9,9			   12/12	V
 711	   Y	  TYR711:P	-0.314		  7	-0.723,-0.127			    9,6			   12/12	Y,N
 712	   A	  ALA712:P	-0.817		  9	-0.952,-0.760			    9,9			   12/12	A
 713	   A	  ALA713:P	-0.817		  9	-0.952,-0.760			    9,9			   12/12	A
 714	   K	  LYS714:P	-0.775		  9	-0.952,-0.723			    9,9			   12/12	K
 715	   H	  HIS715:P	-0.808		  9	-0.952,-0.760			    9,9			   12/12	H
 716	   F	  PHE716:P	-0.724		  9	-0.945,-0.636			    9,8			   12/12	F
 717	   G	  GLY717:P	-0.283		  7*	-0.723,-0.012			    9,5			   12/12	G,D
 718	   I	  ILE718:P	-0.819		  9	-0.952,-0.760			    9,9			   12/12	I
 719	   T	  THR719:P	-0.825		  9	-0.952,-0.793			    9,9			   12/12	T
 720	   F	  PHE720:P	-0.724		  9	-0.945,-0.636			    9,8			   12/12	F
 721	   L	  LEU721:P	-0.730		  9	-0.945,-0.636			    9,8			   12/12	L
 722	   Y	  TYR722:P	-0.215		  6*	-0.723, 0.122			    9,4			   12/12	Y,C
 723	   R	  ARG723:P	-0.793		  9	-0.952,-0.723			    9,9			   12/12	R
 724	   K	  LYS724:P	 0.001		  5*	-0.529, 0.279			    8,3			   12/12	R,K
 725	   D	  ASP725:P	-0.455		  7	-0.793,-0.229			    9,6			   12/12	D,E
 726	   G	  GLY726:P	-0.096		  6*	-0.636, 0.279			    8,3			   12/12	G,T
 727	   K	  LYS727:P	-0.775		  9	-0.952,-0.723			    9,9			   12/12	K
 728	   C	  CYS728:P	 0.298		  3*	-0.396, 0.701			    7,1			   12/12	C,F,Y
 729	   G	  GLY729:P	-0.258		  6*	-0.723,-0.012			    9,5			   12/12	R,G
 730	   V	  VAL730:P	-0.525		  8	-0.822,-0.396			    9,7			   12/12	I,V
 731	   K	  LYS731:P	-0.183		  6*	-0.586, 0.122			    8,4			   12/12	S,N,K
 732	   I	  ILE732:P	-0.819		  9	-0.952,-0.760			    9,9			   12/12	I
 733	   F	  PHE733:P	-0.724		  9	-0.945,-0.636			    9,8			   12/12	F
 734	   D	  ASP734:P	-0.267		  6*	-0.723,-0.012			    9,5			   12/12	D,G
 735	   K	  LYS735:P	-0.046		  5*	-0.529, 0.279			    8,3			   12/12	R,T,K
 736	   V	  VAL736:P	 0.866		  1	 0.122, 1.419			    4,1			   12/12	T,V,I
 737	   Y	  TYR737:P	-0.716		  9	-0.945,-0.636			    9,8			   12/12	Y
 738	   E	  GLU738:P	-0.781		  9	-0.952,-0.723			    9,9			   12/12	E
 739	   I	  ILE739:P	-0.819		  9	-0.952,-0.760			    9,9			   12/12	I
 740	   D	  ASP740:P	 0.001		  5*	-0.529, 0.279			    8,3			   12/12	E,D
 741	   I	  ILE741:P	-0.539		  8	-0.822,-0.396			    9,7			   12/12	T,I
 742	   L	  LEU742:P	-0.730		  9	-0.945,-0.636			    9,8			   12/12	L
 743	   A	  ALA743:P	-0.817		  9	-0.952,-0.760			    9,9			   12/12	A
 744	   T	  THR744:P	 0.184		  4*	-0.396, 0.468			    7,2			   12/12	S,I,T
 745	   I	  ILE745:P	 0.159		  4*	-0.396, 0.468			    7,2			   12/12	V,I
 746	   E	  GLU746:P	-0.781		  9	-0.952,-0.723			    9,9			   12/12	E
 747	   F	  PHE747:P	-0.724		  9	-0.945,-0.636			    9,8			   12/12	F
 748	   T	  THR748:P	-0.825		  9	-0.952,-0.793			    9,9			   12/12	T
 749	   S	  SER749:P	-0.834		  9	-0.952,-0.793			    9,9			   12/12	S
 750	   K	  LYS750:P	 0.028		  5*	-0.529, 0.279			    8,3			   12/12	K,E,Q
 751	   R	  ARG751:P	-0.793		  9	-0.952,-0.723			    9,9			   12/12	R
 752	   K	  LYS752:P	-0.775		  9	-0.952,-0.723			    9,9			   12/12	K
 753	   M	  MET753:P	-0.812		  9	-0.952,-0.760			    9,9			   12/12	M
 754	   S	  SER754:P	-0.834		  9	-0.952,-0.793			    9,9			   12/12	S
 755	   T	  THR755:P	-0.565		  8	-0.822,-0.396			    9,7			   12/12	T,S
 756	   I	  ILE756:P	 0.182		  4*	-0.396, 0.468			    7,2			   12/12	V,I
 757	   V	  VAL757:P	-0.523		  8	-0.822,-0.396			    9,7			   12/12	V,I
 758	   C	  CYS758:P	-0.707		  9	-0.945,-0.636			    9,8			   12/12	C
 759	   R	  ARG759:P	-0.449		  7	-0.793,-0.229			    9,6			   12/12	R,K
 760	   I	  ILE760:P	-0.819		  9	-0.952,-0.760			    9,9			   12/12	I
 761	   P	  PRO761:P	-0.746		  9	-0.945,-0.682			    9,9			   12/12	P
 762	   V	  VAL762:P	 0.365		  3*	-0.229, 0.701			    6,1			   12/12	F,I,V
 763	   M	  MET763:P	 1.790		  1	 0.468, 2.082			    2,1			   12/12	P,K,R,I,F,M
 764	   S	  SER764:P	 0.761		  1	 0.122, 1.004			    4,1			   12/12	A,S,P,N
 765	   N	  ASN765:P	 0.825		  1	 0.122, 1.419			    4,1			   12/12	S,T,C,N,P
 766	   E	  GLU766:P	 2.346		  1	 0.701, 3.932			    1,1			   11/12	S,E,C,H,Y
 767	   D	  ASP767:P	 0.911		  1	 0.122, 1.419			    4,1			   12/12	T,S,D,N
 768	   T	  THR768:P	 3.058		  1	 1.419, 3.932			    1,1			   12/12	T,D,P,Y,N,H,S,K,G
 769	   K	  LYS769:P	 2.264		  1	 1.004, 3.932			    1,1			   12/12	E,D,G,K,N
 770	   T	  THR770:P	 2.370		  1	 1.004, 3.932			    1,1			   11/12	P,Y,N,D,A,T
 771	   S	  SER771:P	 1.845		  1	 0.701, 2.082			    1,1			   10/12	K,P,N,G,T,S
 772	   P	  PRO772:P	 2.165		  1	 0.701, 3.932			    1,1			    6/12	R,N,P,G
 773	   T	  THR773:P	 2.490		  1*	 1.004, 3.932			    1,1			    5/12	E,A,T,I,N
 774	   N	  ASN774:P	 0.524		  2*	-0.317, 1.004			    7,1			    5/12	N,D,T
 775	   N	  ASN775:P	 0.481		  2*	-0.317, 1.004			    7,1			    5/12	A,S,N
 776	   K	  LYS776:P	 3.466		  1	 2.082, 3.932			    1,1			   12/12	R,F,S,K,G,I,A,D,N
 777	   T	  THR777:P	 2.599		  1	 1.004, 3.932			    1,1			   12/12	G,N,A,D,T
 778	   M	  MET778:P	 3.076		  1	 1.419, 3.932			    1,1			   12/12	V,M,A,Q,F,S,K,G
 779	   P	  PRO779:P	 2.582		  1	 1.004, 3.932			    1,1			   12/12	S,A,E,I,N,K,P
 780	   R	  ARG780:P	 2.606		  1	 1.004, 3.932			    1,1			   11/12	S,R,G,K,A,T,Y,N
 781	   P	  PRO781:P	 1.993		  1	 0.701, 3.932			    1,1			   11/12	D,S,A,G,K,P
 782	   P	  PRO782:P	 0.951		  1	 0.122, 1.419			    4,1			   12/12	P,N,E,R,T
 783	   N	  ASN783:P	 2.962		  1	 1.419, 3.932			    1,1			   12/12	S,G,K,M,A,V,P,N
 784	   G	  GLY784:P	 3.361		  1	 1.419, 3.932			    1,1			   12/12	G,N,D,A,R,V,T
 785	   N	  ASN785:P	 2.695		  1	 1.004, 3.932			    1,1			   12/12	C,R,S,A,K,N
 786	   G	  GLY786:P	 0.920		  1	 0.122, 1.419			    4,1			   12/12	A,T,G,N
 787	   N	  ASN787:P	 2.443		  1	 1.004, 3.932			    1,1			   12/12	K,Y,N,A,F,R
 788	   N	  ASN788:P	 0.602		  2*	-0.127, 1.004			    6,1			   12/12	T,E,D,N,G
 789	   D	  ASP789:P	 2.421		  1	 1.004, 3.932			    1,1			   12/12	G,K,N,D,S,A
 790	   V	  VAL790:P	 2.626		  1	 1.004, 3.932			    1,1			   12/12	M,S,I,V,T,N
 791	   L	  LEU791:P	 2.095		  1	 0.701, 3.932			    1,1			   12/12	D,S,A,L,G,N
 792	   T	  THR792:P	 1.057		  1	 0.279, 1.419			    3,1			   12/12	T,D,N,G
 793	   N	  ASN793:P	 3.394		  1	 2.082, 3.932			    1,1			   12/12	R,Q,H,S,V,T,C,N,Y
 794	   G	  GLY794:P	 2.098		  1	 0.701, 3.932			    1,1			   11/12	G,A,E,X,R,L
 795	   E	  GLU795:P	 2.853		  1	 1.419, 3.932			    1,1			   11/12	G,K,A,E,R,X
 796	   R	  ARG796:P	 2.101		  1	 0.701, 3.932			    1,1			   11/12	E,V,X,T,R,G
 797	   N	  ASN797:P	 1.727		  1	 0.468, 2.082			    2,1			   10/12	G,K,N,D,S,T,X
 798	   G	  GLY798:P	 1.843		  1	 0.701, 2.082			    1,1			   12/12	D,G,N,K,Y
 799	   N	  ASN799:P	 2.659		  1	 1.004, 3.932			    1,1			   12/12	Q,E,P,Y,N,G
 800	   G	  GLY800:P	 3.081		  1	 1.419, 3.932			    1,1			   12/12	A,E,D,N,K,G
 801	   M	  MET801:P	 2.257		  1	 1.004, 3.932			    1,1			   12/12	S,M,E,V,K
 802	   G	  GLY802:P	 3.164		  1	 1.419, 3.932			    1,1			   12/12	A,S,E,I,G,N,K
 803	   D	  ASP803:P	 2.500		  1	 1.004, 3.932			    1,1			   12/12	K,N,D,S,R,T,V
 804	   S	  SER804:P	 2.766		  1	 1.419, 3.932			    1,1			   12/12	G,N,S,E
 805	   P	  PRO805:P	 2.011		  1	 0.701, 3.932			    1,1			   12/12	P,N,E,D,S,A
 806	   A	  ALA806:P	 2.599		  1	 1.004, 3.932			    1,1			   12/12	Q,R,V,H,A,S,N
 807	   N	  ASN807:P	 0.647		  2*	-0.012, 1.004			    5,1			   12/12	P,N,D,S
 808	   L	  LEU808:P	 3.229		  1	 1.419, 3.932			    1,1			   11/12	N,I,T,F,L,S,A
 809	   P	  PRO809:P	 1.746		  1	 0.468, 2.082			    2,1			   11/12	L,I,S,Y,P
 810	   T	  THR810:P	 3.063		  1	 1.419, 3.932			    1,1			   11/12	K,G,V,C,I,T,A
 811	   G	  GLY811:P	 1.821		  1	 0.701, 2.082			    1,1			   11/12	E,R,H,G,K
 812	   N	  ASN812:P	 0.247		  4*	-0.317, 0.701			    7,1			   11/12	K,N
 813	   E	  GLU813:P	 0.862		  1*	-0.012, 1.419			    5,1			   11/12	E,D,S
 814	   S	  SER814:P	 3.319		  1	 1.419, 3.932			    1,1			   11/12	M,A,S,W,V,I,L
 815	   N	  ASN815:P	 0.824		  1*	-0.012, 1.419			    5,1			   11/12	N,T,I
 816	   I	  ILE816:P	 2.755		  1	 1.004, 3.932			    1,1			   11/12	K,G,I,T,L,S
 817	   S	  SER817:P	 0.528		  2*	-0.127, 1.004			    6,1			   11/12	N,L,H,T,S
 818	   P	  PRO818:P	 0.271		  4*	-0.317, 0.701			    7,1			   11/12	S,T,P
 819	   A	  ALA819:P	-0.418		  7*	-0.923,-0.229			    9,6			    3/12	A
 820	   P	  PRO820:P	 2.086		  1*	 0.468, 3.932			    2,1			    3/12	A,G,P
 821	   L	  LEU821:P	 2.321		  1*	 0.701, 3.932			    1,1			    3/12	A,L,I
 822	   E	  GLU822:P	 0.891		  1*	-0.317, 1.419			    7,1			    3/12	E,G
 823	   K	  LYS823:P	 2.004		  1	 0.701, 3.932			    1,1			   11/12	K,P,Q,R,E
 824	   V	  VAL824:P	 1.102		  1	 0.122, 1.419			    4,1			   12/12	W,L,C,V
 825	   K	  LYS825:P	 0.395		  3*	-0.229, 0.701			    6,1			   11/12	K,N,R
 826	   D	  ASP826:P	 1.473		  1	 0.468, 2.082			    2,1			   10/12	N,K,T,E,D
 827	   N	  ASN827:P	 0.568		  2*	-0.127, 1.004			    6,1			   10/12	N,T,D
 828	   A	  ALA828:P	 1.797		  1	 0.468, 2.082			    2,1			    9/12	P,A,S,V,I
 829	   S	  SER829:P	 1.632		  1	 0.468, 2.082			    2,1			    9/12	T,L,A,M,S
 830	   N	  ASN830:P	 0.736		  1*	-0.127, 1.419			    6,1			    9/12	D,E,T,N
 831	   S	  SER831:P	 0.802		  1*	-0.127, 1.419			    6,1			    9/12	N,S,E,I
 832	   D	  ASP832:P	 2.212		  1	 0.701, 3.932			    1,1			    9/12	N,G,H,D,S
 833	   V	  VAL833:P	 2.388		  1	 1.004, 3.932			    1,1			    9/12	S,F,I,V,L
 834	   N	  ASN834:P	 3.214		  1	 1.419, 3.932			    1,1			    9/12	D,A,V,P,K,N
 835	   K	  LYS835:P	 2.711		  1	 1.004, 3.932			    1,1			    9/12	H,I,S,P,K,N
 836	   I	  ILE836:P	 2.065		  1	 0.701, 3.932			    1,1			    9/12	S,E,I,G,N
 837	   G	  GLY837:P	 0.680		  1*	-0.229, 1.004			    6,1			    9/12	K,N,G
 838	   K	  LYS838:P	 1.020		  1*	-0.012, 1.419			    5,1			    9/12	E,N,K,G
 839	   K	  LYS839:P	 2.647		  1	 1.004, 3.932			    1,1			    9/12	N,K,E,I,R
 840	   E	  GLU840:P	 3.396		  1	 2.082, 3.932			    1,1			    9/12	P,L,H,S,D,E
 841	   N	  ASN841:P	 0.650		  1*	-0.127, 1.004			    6,1			    9/12	Q,T,N,K
 842	   K	  LYS842:P	 0.117		  4*	-0.466, 0.468			    8,2			   10/12	K,N
 843	   N	  ASN843:P	-0.027		  5*	-0.529, 0.279			    8,3			   10/12	G,N,K
 844	   N	  ASN844:P	 0.468		  2*	-0.229, 1.004			    6,1			   12/12	Y,N,V,A
 845	   N	  ASN845:P	 1.410		  1	 0.468, 2.082			    2,1			   12/12	D,S,Q,T,K,N
 846	   K	  LYS846:P	 0.994		  1	 0.122, 1.419			    4,1			   12/12	S,E,Q,H,N,K
 847	   D	  ASP847:P	-0.062		  5*	-0.529, 0.279			    8,3			   12/12	N,D,H
 848	   K	  LYS848:P	 2.047		  1	 0.701, 3.932			    1,1			    6/12	K,H,T,C
 849	   K	  LYS849:P	 0.624		  2*	-0.127, 1.004			    6,1			    7/12	Q,K,N
 850	   M	  MET850:P	 2.566		  1	 1.004, 3.932			    1,1			    7/12	K,N,D,E,M,T
 851	   G	  GLY851:P	 3.165		  1	 1.419, 3.932			    1,1			    7/12	K,G,H,T,E
 852	   T	  THR852:P	 2.638		  1	 1.004, 3.932			    1,1			   12/12	K,N,D,E,R,Q,T
 853	   N	  ASN853:P	 2.284		  1	 1.004, 3.932			    1,1			   12/12	N,K,I,T,V,E
 854	   N	  ASN854:P	 1.751		  1	 0.468, 2.082			    2,1			   12/12	E,D,S,P,K,N
 855	   D	  ASP855:P	 1.183		  1	 0.279, 1.419			    3,1			   12/12	E,D,G
 856	   V	  VAL856:P	 0.697		  1*	-0.012, 1.004			    5,1			   12/12	K,V,I,T
 857	   I	  ILE857:P	-0.064		  5*	-0.529, 0.279			    8,3			   12/12	F,I,C
 858	   S	  SER858:P	 0.100		  4*	-0.396, 0.468			    7,2			   12/12	N,T,S
 859	   C	  CYS859:P	-0.707		  9	-0.945,-0.636			    9,8			   12/12	C
 860	   E	  GLU860:P	 0.056		  5*	-0.466, 0.468			    8,2			   12/12	E,K
 861	   N	  ASN861:P	-0.821		  9	-0.952,-0.793			    9,9			   12/12	N
 862	   T	  THR862:P	-0.140		  6*	-0.586, 0.122			    8,4			   12/12	S,T,C
 863	   K	  LYS863:P	-0.775		  9	-0.952,-0.723			    9,9			   12/12	K
 864	   K	  LYS864:P	 0.588		  2*	-0.127, 1.004			    6,1			   12/12	N,K,S,E
 865	   H	  HIS865:P	-0.528		  8	-0.822,-0.396			    9,7			   12/12	H,S
 866	   K	  LYS866:P	-0.775		  9	-0.952,-0.723			    9,9			   12/12	K
 867	   I	  ILE867:P	-0.819		  9	-0.952,-0.760			    9,9			   12/12	I
 868	   V	  VAL868:P	-0.497		  8	-0.793,-0.317			    9,7			   12/12	M,V
 869	   V	  VAL869:P	-0.285		  7*	-0.723,-0.012			    9,5			   12/12	V,L
 870	   F	  PHE870:P	-0.724		  9	-0.945,-0.636			    9,8			   12/12	F
 871	   C	  CYS871:P	-0.212		  6*	-0.682, 0.122			    9,4			   12/12	S,C
 872	   K	  LYS872:P	-0.775		  9	-0.952,-0.723			    9,9			   12/12	K
 873	   G	  GLY873:P	-0.727		  9	-0.945,-0.636			    9,8			   12/12	G
 874	   A	  ALA874:P	-0.817		  9	-0.952,-0.760			    9,9			   12/12	A
 875	   G	  GLY875:P	-0.727		  9	-0.945,-0.636			    9,8			   12/12	G
 876	   C	  CYS876:P	-0.195		  6	-0.636,-0.012			    8,5			   12/12	C,S,D
 877	   V	  VAL877:P	-0.517		  8	-0.822,-0.317			    9,7			   12/12	V,I
 878	   I	  ILE878:P	-0.819		  9	-0.952,-0.760			    9,9			   12/12	I
 879	   I	  ILE879:P	-0.295		  7*	-0.723,-0.012			    9,5			   12/12	I,L
 880	   K	  LYS880:P	-0.427		  7	-0.793,-0.229			    9,6			   12/12	N,K
 881	   K	  LYS881:P	-0.775		  9	-0.952,-0.723			    9,9			   12/12	K
 882	   L	  LEU882:P	-0.730		  9	-0.945,-0.636			    9,8			   12/12	L
 883	   A	  ALA883:P	-0.817		  9	-0.952,-0.760			    9,9			   12/12	A
 884	   N	  ASN884:P	 1.042		  1	 0.122, 1.419			    4,1			   12/12	N,K,H
 885	   K	  LYS885:P	-0.401		  7	-0.760,-0.229			    9,6			   12/12	K,R
 886	   T	  THR886:P	-0.825		  9	-0.952,-0.793			    9,9			   12/12	T
 887	   D	  ASP887:P	 0.580		  2*	-0.127, 1.004			    6,1			   12/12	E,D,K
 888	   V	  VAL888:P	 0.585		  2*	-0.127, 1.004			    6,1			   12/12	V,I
 889	   D	  ASP889:P	-0.795		  9	-0.952,-0.760			    9,9			   12/12	D
 890	   D	  ASP890:P	 0.277		  4*	-0.317, 0.701			    7,1			   12/12	E,D
 891	   L	  LEU891:P	-0.123		  6*	-0.586, 0.122			    8,4			   12/12	L,I,M
 892	   T	  THR892:P	-0.825		  9	-0.952,-0.793			    9,9			   12/12	T
 893	   I	  ILE893:P	-0.819		  9	-0.952,-0.760			    9,9			   12/12	I
 894	   E	  GLU894:P	-0.781		  9	-0.952,-0.723			    9,9			   12/12	E
 895	   H	  HIS895:P	-0.495		  8	-0.793,-0.317			    9,7			   12/12	H,Y
 896	   M	  MET896:P	-0.812		  9	-0.952,-0.760			    9,9			   12/12	M
 897	   E	  GLU897:P	-0.781		  9	-0.952,-0.723			    9,9			   12/12	E
 898	   T	  THR898:P	-0.217		  6	-0.636,-0.012			    8,5			   12/12	N,A,T
 899	   Y	  TYR899:P	-0.225		  6*	-0.723,-0.012			    9,5			   12/12	Y,F
 900	   A	  ALA900:P	-0.817		  9	-0.952,-0.760			    9,9			   12/12	A
 901	   D	  ASP901:P	-0.795		  9	-0.952,-0.760			    9,9			   12/12	D
 902	   E	  GLU902:P	-0.781		  9	-0.952,-0.723			    9,9			   12/12	E
 903	   G	  GLY903:P	-0.727		  9	-0.945,-0.636			    9,8			   12/12	G
 904	   L	  LEU904:P	-0.730		  9	-0.945,-0.636			    9,8			   12/12	L
 905	   R	  ARG905:P	-0.793		  9	-0.952,-0.723			    9,9			   12/12	R
 906	   T	  THR906:P	-0.825		  9	-0.952,-0.793			    9,9			   12/12	T
 907	   L	  LEU907:P	-0.730		  9	-0.945,-0.636			    9,8			   12/12	L
 908	   C	  CYS908:P	-0.707		  9	-0.945,-0.636			    9,8			   12/12	C
 909	   I	  ILE909:P	-0.819		  9	-0.952,-0.760			    9,9			   12/12	I
 910	   A	  ALA910:P	-0.817		  9	-0.952,-0.760			    9,9			   12/12	A
 911	   Y	  TYR911:P	-0.351		  7	-0.760,-0.127			    9,6			   12/12	Q,Y
 912	   K	  LYS912:P	-0.443		  7	-0.793,-0.229			    9,6			   12/12	R,K
 913	   E	  GLU913:P	-0.781		  9	-0.952,-0.723			    9,9			   12/12	E
 914	   L	  LEU914:P	-0.730		  9	-0.945,-0.636			    9,8			   12/12	L
 915	   S	  SER915:P	-0.282		  7	-0.636,-0.012			    8,5			   12/12	T,S,N
 916	   P	  PRO916:P	 0.397		  3*	-0.229, 0.701			    6,1			   12/12	E,Q,H,P
 917	   K	  LYS917:P	-0.024		  5*	-0.529, 0.279			    8,3			   12/12	A,E,K
 918	   E	  GLU918:P	 0.897		  1	 0.122, 1.419			    4,1			   12/12	T,V,E,S
 919	   F	  PHE919:P	-0.724		  9	-0.945,-0.636			    9,8			   12/12	F
 920	   A	  ALA920:P	-0.817		  9	-0.952,-0.760			    9,9			   12/12	A
 921	   I	  ILE921:P	 1.644		  1	 0.468, 2.082			    2,1			   12/12	K,E,Q,I,V
 922	   W	  TRP922:P	-0.599		  8	-0.935,-0.466			    9,8			   12/12	W
 923	   Y	  TYR923:P	-0.716		  9	-0.945,-0.636			    9,8			   12/12	Y
 924	   N	  ASN924:P	 2.061		  1	 0.701, 3.932			    1,1			   12/12	H,R,D,E,K,N
 925	   L	  LEU925:P	 0.200		  4*	-0.396, 0.468			    7,2			   12/12	L,S
 926	   Y	  TYR926:P	-0.716		  9	-0.945,-0.636			    9,8			   12/12	Y
 927	   K	  LYS927:P	-0.775		  9	-0.952,-0.723			    9,9			   12/12	K
 928	   E	  GLU928:P	-0.781		  9	-0.952,-0.723			    9,9			   12/12	E
 929	   A	  ALA929:P	-0.817		  9	-0.952,-0.760			    9,9			   12/12	A
 930	   S	  SER930:P	-0.256		  6	-0.636,-0.012			    8,5			   12/12	M,S,T
 931	   L	  LEU931:P	 0.113		  4*	-0.466, 0.468			    8,2			   12/12	L,V
 932	   S	  SER932:P	-0.834		  9	-0.952,-0.793			    9,9			   12/12	S
 933	   L	  LEU933:P	 0.239		  4*	-0.317, 0.701			    7,1			   12/12	L,I,V
 934	   N	  ASN934:P	 0.019		  5*	-0.529, 0.279			    8,3			   12/12	K,N,V
 935	   G	  GLY935:P	-0.410		  7	-0.760,-0.229			    9,6			   12/12	G,D
 936	   R	  ARG936:P	-0.793		  9	-0.952,-0.723			    9,9			   12/12	R
 937	   E	  GLU937:P	-0.047		  5*	-0.529, 0.279			    8,3			   12/12	D,E
 938	   E	  GLU938:P	-0.007		  5*	-0.529, 0.279			    8,3			   12/12	E,R,Q
 939	   N	  ASN939:P	-0.201		  6	-0.636,-0.012			    8,5			   12/12	N,K
 940	   I	  ILE940:P	 0.976		  1*	-0.012, 1.419			    5,1			   12/12	L,I,V
 941	   E	  GLU941:P	-0.395		  7	-0.760,-0.229			    9,6			   12/12	K,E
 942	   K	  LYS942:P	 1.169		  1	 0.279, 1.419			    3,1			   12/12	N,K,S,H
 943	   I	  ILE943:P	-0.197		  6	-0.636,-0.012			    8,5			   12/12	I,V,A
 944	   A	  ALA944:P	-0.817		  9	-0.952,-0.760			    9,9			   12/12	A
 945	   G	  GLY945:P	 0.907		  1	 0.122, 1.419			    4,1			   12/12	E,D,S,G
 946	   G	  GLY946:P	 3.495		  1	 2.082, 3.932			    1,1			   12/12	D,S,H,F,V,G,Y
 947	   I	  ILE947:P	-0.819		  9	-0.952,-0.760			    9,9			   12/12	I
 948	   E	  GLU948:P	-0.781		  9	-0.952,-0.723			    9,9			   12/12	E
 949	   N	  ASN949:P	-0.536		  8	-0.822,-0.396			    9,7			   12/12	K,N
 950	   D	  ASP950:P	 0.286		  3*	-0.317, 0.701			    7,1			   12/12	D,N,K
 951	   L	  LEU951:P	-0.730		  9	-0.945,-0.636			    9,8			   12/12	L
 952	   I	  ILE952:P	 0.153		  4*	-0.396, 0.468			    7,2			   12/12	T,I,V
 953	   L	  LEU953:P	-0.730		  9	-0.945,-0.636			    9,8			   12/12	L
 954	   Q	  GLN954:P	-0.797		  9	-0.952,-0.760			    9,9			   12/12	Q
 955	   G	  GLY955:P	-0.727		  9	-0.945,-0.636			    9,8			   12/12	G
 956	   V	  VAL956:P	-0.517		  8	-0.822,-0.317			    9,7			   12/12	I,V
 957	   T	  THR957:P	-0.825		  9	-0.952,-0.793			    9,9			   12/12	T
 958	   G	  GLY958:P	-0.727		  9	-0.945,-0.636			    9,8			   12/12	G
 959	   I	  ILE959:P	-0.819		  9	-0.952,-0.760			    9,9			   12/12	I
 960	   E	  GLU960:P	-0.781		  9	-0.952,-0.723			    9,9			   12/12	E
 961	   D	  ASP961:P	-0.795		  9	-0.952,-0.760			    9,9			   12/12	D
 962	   K	  LYS962:P	-0.775		  9	-0.952,-0.723			    9,9			   12/12	K
 963	   L	  LEU963:P	-0.730		  9	-0.945,-0.636			    9,8			   12/12	L
 964	   Q	  GLN964:P	-0.797		  9	-0.952,-0.760			    9,9			   12/12	Q
 965	   E	  GLU965:P	-0.781		  9	-0.952,-0.723			    9,9			   12/12	E
 966	   G	  GLY966:P	-0.727		  9	-0.945,-0.636			    9,8			   12/12	G
 967	   V	  VAL967:P	-0.815		  9	-0.952,-0.760			    9,9			   12/12	V
 968	   G	  GLY968:P	-0.536		  8	-0.822,-0.396			    9,7			   12/12	G,S
 969	   S	  SER969:P	-0.571		  8	-0.822,-0.396			    9,7			   12/12	A,S
 970	   T	  THR970:P	-0.825		  9	-0.952,-0.793			    9,9			   12/12	T
 971	   I	  ILE971:P	-0.819		  9	-0.952,-0.760			    9,9			   12/12	I
 972	   E	  GLU972:P	-0.781		  9	-0.952,-0.723			    9,9			   12/12	E
 973	   D	  ASP973:P	-0.384		  7	-0.760,-0.127			    9,6			   12/12	V,D
 974	   L	  LEU974:P	-0.730		  9	-0.945,-0.636			    9,8			   12/12	L
 975	   R	  ARG975:P	-0.449		  7	-0.793,-0.229			    9,6			   12/12	R,K
 976	   L	  LEU976:P	 0.696		  1*	-0.127, 1.004			    6,1			   12/12	M,Q,I,L
 977	   A	  ALA977:P	-0.521		  8	-0.822,-0.396			    9,7			   12/12	S,A
 978	   G	  GLY978:P	-0.727		  9	-0.945,-0.636			    9,8			   12/12	G
 979	   I	  ILE979:P	-0.528		  8	-0.822,-0.396			    9,7			   12/12	I,V
 980	   H	  HIS980:P	-0.808		  9	-0.952,-0.760			    9,9			   12/12	H
 981	   V	  VAL981:P	-0.212		  6	-0.636,-0.012			    8,5			   12/12	I,V
 982	   W	  TRP982:P	-0.599		  8	-0.935,-0.466			    9,8			   12/12	W
 983	   M	  MET983:P	-0.812		  9	-0.952,-0.760			    9,9			   12/12	M
 984	   L	  LEU984:P	-0.730		  9	-0.945,-0.636			    9,8			   12/12	L
 985	   T	  THR985:P	-0.825		  9	-0.952,-0.793			    9,9			   12/12	T
 986	   G	  GLY986:P	-0.727		  9	-0.945,-0.636			    9,8			   12/12	G
 987	   D	  ASP987:P	-0.795		  9	-0.952,-0.760			    9,9			   12/12	D
 988	   K	  LYS988:P	-0.775		  9	-0.952,-0.723			    9,9			   12/12	K
 989	   I	  ILE989:P	-0.521		  8	-0.822,-0.396			    9,7			   12/12	V,I
 990	   E	  GLU990:P	-0.781		  9	-0.952,-0.723			    9,9			   12/12	E
 991	   T	  THR991:P	-0.825		  9	-0.952,-0.793			    9,9			   12/12	T
 992	   A	  ALA992:P	-0.517		  8	-0.822,-0.317			    9,7			   12/12	S,A
 993	   I	  ILE993:P	-0.387		  7	-0.760,-0.127			    9,6			   12/12	I,M
 994	   N	  ASN994:P	-0.821		  9	-0.952,-0.793			    9,9			   12/12	N
 995	   I	  ILE995:P	-0.819		  9	-0.952,-0.760			    9,9			   12/12	I
 996	   G	  GLY996:P	-0.727		  9	-0.945,-0.636			    9,8			   12/12	G
 997	   I	  ILE997:P	-0.521		  8	-0.822,-0.396			    9,7			   12/12	I,V
 998	   A	  ALA998:P	-0.817		  9	-0.952,-0.760			    9,9			   12/12	A
 999	   T	  THR999:P	-0.522		  8	-0.822,-0.396			    9,7			   12/12	A,T
1000	   N	 ASN1000:P	-0.821		  9	-0.952,-0.793			    9,9			   12/12	N
1001	   L	 LEU1001:P	-0.252		  6*	-0.723,-0.012			    9,5			   12/12	L,V
1002	   I	 ILE1002:P	-0.819		  9	-0.952,-0.760			    9,9			   12/12	I
1003	   D	 ASP1003:P	-0.795		  9	-0.952,-0.760			    9,9			   12/12	D
1004	   N	 ASN1004:P	-0.821		  9	-0.952,-0.793			    9,9			   12/12	N
1005	   G	 GLY1005:P	-0.075		  5*	-0.636, 0.279			    8,3			   12/12	G,Y
1006	   S	 SER1006:P	-0.834		  9	-0.952,-0.793			    9,9			   12/12	S
1007	   E	 GLU1007:P	-0.031		  5*	-0.529, 0.279			    8,3			   12/12	D,E,V
1008	   Q	 GLN1008:P	-0.797		  9	-0.952,-0.760			    9,9			   12/12	Q
1009	   F	 PHE1009:P	-0.239		  6*	-0.723,-0.012			    9,5			   12/12	F,Y
1010	   I	 ILE1010:P	-0.515		  8	-0.822,-0.317			    9,7			   12/12	I,V
1011	   Y	 TYR1011:P	-0.716		  9	-0.945,-0.636			    9,8			   12/12	Y
1012	   T	 THR1012:P	-0.825		  9	-0.952,-0.793			    9,9			   12/12	T
1013	   E	 GLU1013:P	-0.016		  5*	-0.529, 0.279			    8,3			   12/12	E,A
1014	   E	 GLU1014:P	 0.146		  4*	-0.466, 0.468			    8,2			   12/12	D,E
1015	   L	 LEU1015:P	-0.217		  6*	-0.723,-0.012			    9,5			   12/12	L,Y
1016	   A	 ALA1016:P	 0.416		  3*	-0.229, 0.701			    6,1			   12/12	A,V,I,L
1017	   L	 LEU1017:P	 0.573		  2*	-0.127, 1.004			    6,1			   12/12	S,E,T,L
1018	   S	 SER1018:P	 1.001		  1	 0.122, 1.419			    4,1			   12/12	N,K,S,C
1019	   E	 GLU1019:P	-0.287		  7*	-0.723,-0.012			    9,5			   12/12	E,N
1020	   D	 ASP1020:P	 0.683		  1*	-0.012, 1.004			    5,1			   12/12	N,D,E
1021	   L	 LEU1021:P	 0.697		  1*	-0.127, 1.004			    6,1			   12/12	L,E,A
1022	   L	 LEU1022:P	-0.730		  9	-0.945,-0.636			    9,8			   12/12	L
1023	   M	 MET1023:P	-0.507		  8	-0.822,-0.317			    9,7			   12/12	I,M
1024	   K	 LYS1024:P	 0.402		  3*	-0.229, 0.701			    6,1			   12/12	K,N,E
1025	   K	 LYS1025:P	-0.404		  7	-0.760,-0.229			    9,6			   12/12	R,K
1026	   L	 LEU1026:P	 0.142		  4*	-0.466, 0.468			    8,2			   12/12	L,I
1027	   D	 ASP1027:P	-0.459		  7	-0.793,-0.317			    9,7			   12/12	N,D
1028	   E	 GLU1028:P	 0.425		  3*	-0.229, 0.701			    6,1			   12/12	Q,A,E,D
1029	   D	 ASP1029:P	-0.795		  9	-0.952,-0.760			    9,9			   12/12	D
1030	   I	 ILE1030:P	-0.819		  9	-0.952,-0.760			    9,9			   12/12	I
1031	   I	 ILE1031:P	 0.594		  2*	-0.127, 1.004			    6,1			   12/12	L,I,F
1032	   Y	 TYR1032:P	 0.819		  1*	-0.012, 1.419			    5,1			   12/12	S,M,K,Y,N
1033	   I	 ILE1033:P	-0.063		  5*	-0.529, 0.279			    8,3			   12/12	I,V,A
1034	   E	 GLU1034:P	-0.781		  9	-0.952,-0.723			    9,9			   12/12	E
1035	   K	 LYS1035:P	-0.401		  7	-0.760,-0.229			    9,6			   12/12	N,K
1036	   S	 SER1036:P	-0.212		  6	-0.636,-0.012			    8,5			   12/12	T,S,A
1037	   L	 LEU1037:P	-0.730		  9	-0.945,-0.636			    9,8			   12/12	L
1038	   N	 ASN1038:P	-0.540		  8	-0.822,-0.396			    9,7			   12/12	S,N
1039	   L	 LEU1039:P	 0.241		  4*	-0.396, 0.701			    7,1			   12/12	I,L
1040	   L	 LEU1040:P	-0.293		  7*	-0.723,-0.012			    9,5			   12/12	L,P
1041	   H	 HIS1041:P	-0.808		  9	-0.952,-0.760			    9,9			   12/12	H
1042	   F	 PHE1042:P	 0.280		  3*	-0.396, 0.701			    7,1			   12/12	F,Y
1043	   N	 ASN1043:P	 0.213		  4*	-0.317, 0.468			    7,2			   12/12	N,D,E
1044	   F	 PHE1044:P	-0.724		  9	-0.945,-0.636			    9,8			   12/12	F
1045	   D	 ASP1045:P	 0.764		  1*	-0.012, 1.419			    5,1			   12/12	N,S,D,E,T
1046	   T	 THR1046:P	 2.616		  1	 1.004, 3.932			    1,1			   12/12	S,F,N,D,T,C,V,I
1047	   N	 ASN1047:P	-0.208		  6	-0.636,-0.012			    8,5			   12/12	N,D
1048	   K	 LYS1048:P	 1.971		  1	 0.701, 2.082			    1,1			   12/12	K,N,E,D,Q
1049	   V	 VAL1049:P	 2.640		  1	 1.004, 3.932			    1,1			   12/12	E,V,R,T,K
1050	   E	 GLU1050:P	 0.445		  3*	-0.229, 1.004			    6,1			   12/12	E,N,K
1051	   E	 GLU1051:P	 2.104		  1	 0.701, 3.932			    1,1			   12/12	E,D,Q,P,K
1052	   S	 SER1052:P	 0.497		  2*	-0.229, 1.004			    6,1			   12/12	G,N,E,S
1053	   F	 PHE1053:P	-0.724		  9	-0.945,-0.636			    9,8			   12/12	F
1054	   F	 PHE1054:P	 2.748		  1	 1.004, 3.932			    1,1			   12/12	C,I,F,L,G
1055	   Q	 GLN1055:P	 0.018		  5*	-0.529, 0.279			    8,3			   12/12	K,Q,R
1056	   K	 LYS1056:P	 0.371		  3*	-0.229, 0.701			    6,1			   12/12	R,S,N,K
1057	   V	 VAL1057:P	 1.637		  1	 0.468, 2.082			    2,1			   11/12	I,F,C,V,M
1058	   I	 ILE1058:P	-0.157		  6*	-0.682, 0.122			    9,4			   11/12	F,I
1059	   S	 SER1059:P	 0.277		  4*	-0.317, 0.701			    7,1			   11/12	S,C,F,T
1060	   R	 ARG1060:P	 3.179		  1	 1.419, 3.932			    1,1			   11/12	N,S,A,F,V,R
1061	   K	 LYS1061:P	-0.743		  9	-0.945,-0.682			    9,9			   11/12	K
1062	   Y	 TYR1062:P	 1.235		  1	 0.122, 2.082			    4,1			   11/12	E,N,K,Y
1063	   K	 LYS1063:P	-0.279		  7*	-0.723,-0.012			    9,5			   11/12	E,K
1064	   S	 SER1064:P	 1.118		  1	 0.279, 1.419			    3,1			   11/12	K,N,S,C
1065	   T	 THR1065:P	-0.430		  7*	-0.923,-0.229			    9,6			    3/12	T
1066	   D	 ASP1066:P	-0.390		  7*	-0.923,-0.229			    9,6			    3/12	D
1067	   S	 SER1067:P	 0.896		  1	 0.122, 1.419			    4,1			   11/12	S,I,T,G,N
1068	   L	 LEU1068:P	-0.694		  9	-0.945,-0.586			    9,8			   11/12	L
1069	   A	 ALA1069:P	-0.088		  5*	-0.586, 0.122			    8,4			   11/12	S,A,L
1070	   L	 LEU1070:P	-0.141		  6*	-0.682, 0.122			    9,4			   11/12	I,L
1071	   D	 ASP1071:P	 0.423		  3*	-0.229, 0.701			    6,1			   11/12	D,S,K,N
1072	   H	 HIS1072:P	-0.222		  6*	-0.723,-0.012			    9,5			   11/12	P,H
1073	   D	 ASP1073:P	-0.765		  9	-0.945,-0.723			    9,9			   11/12	D
1074	   T	 THR1074:P	 0.948		  1	 0.122, 1.419			    4,1			   11/12	N,K,E,D,T
1075	   Y	 TYR1075:P	-0.678		  9	-0.945,-0.586			    9,8			   11/12	Y
1076	   K	 LYS1076:P	-0.305		  7*	-0.723,-0.012			    9,5			   11/12	N,K
1077	   E	 GLU1077:P	 1.093		  1	 0.122, 1.419			    4,1			   11/12	K,T,L,M,E
1078	   D	 ASP1078:P	 0.650		  1*	-0.229, 1.004			    6,1			   11/12	D,I,L
1079	   M	 MET1079:P	 0.374		  3*	-0.229, 0.701			    6,1			   11/12	T,I,M
1080	   T	 THR1080:P	 0.229		  4*	-0.317, 0.468			    7,2			   11/12	G,N,S,T
1081	   L	 LEU1081:P	 0.823		  1*	-0.012, 1.419			    5,1			   11/12	S,L,T
1082	   N	 ASN1082:P	 1.059		  1*	-0.012, 1.419			    5,1			   12/12	F,L,N,Y
1083	   N	 ASN1083:P	-0.243		  6	-0.636,-0.012			    8,5			   12/12	N,S
1084	   N	 ASN1084:P	-0.175		  6*	-0.586, 0.122			    8,4			   12/12	N,Y,H
1085	   V	 VAL1085:P	-0.815		  9	-0.952,-0.760			    9,9			   12/12	V
1086	   L	 LEU1086:P	-0.694		  9	-0.945,-0.586			    9,8			   11/12	L
1087	   I	 ILE1087:P	-0.439		  7	-0.793,-0.229			    9,6			   11/12	V,I
1088	   V	 VAL1088:P	-0.788		  9	-0.952,-0.723			    9,9			   11/12	V
1089	   D	 ASP1089:P	-0.765		  9	-0.945,-0.723			    9,9			   11/12	D
1090	   G	 GLY1090:P	-0.690		  9	-0.945,-0.586			    9,8			   11/12	G
1091	   S	 SER1091:P	 0.906		  1	 0.122, 1.419			    4,1			   11/12	G,N,S,T
1092	   V	 VAL1092:P	-0.369		  7	-0.760,-0.127			    9,6			   11/12	L,V
1093	   L	 LEU1093:P	-0.160		  6*	-0.682, 0.122			    9,4			   11/12	I,L
1094	   D	 ASP1094:P	-0.765		  9	-0.945,-0.723			    9,9			   11/12	D
1095	   I	 ILE1095:P	-0.445		  7	-0.793,-0.229			    9,6			   11/12	I,T
1096	   L	 LEU1096:P	-0.156		  6*	-0.682, 0.122			    9,4			   11/12	M,L
1097	   L	 LEU1097:P	-0.694		  9	-0.945,-0.586			    9,8			   11/12	L
1098	   S	 SER1098:P	-0.495		  8	-0.793,-0.317			    9,7			   11/12	N,S
1099	   K	 LYS1099:P	 0.706		  1*	-0.127, 1.004			    6,1			   11/12	E,K
1100	   P	 PRO1100:P	-0.139		  6*	-0.682, 0.122			    9,4			   11/12	K,P
1101	   F	 PHE1101:P	-0.033		  5*	-0.636, 0.279			    8,3			   11/12	M,F
1102	   E	 GLU1102:P	-0.750		  9	-0.945,-0.682			    9,9			   11/12	E
1103	   R	 ARG1103:P	-0.341		  7	-0.760,-0.127			    9,6			   11/12	K,R
1104	   K	 LYS1104:P	-0.743		  9	-0.945,-0.682			    9,9			   11/12	K
1105	   F	 PHE1105:P	-0.687		  9	-0.945,-0.586			    9,8			   11/12	F
1106	   F	 PHE1106:P	-0.687		  9	-0.945,-0.586			    9,8			   11/12	F
1107	   Y	 TYR1107:P	-0.678		  9	-0.945,-0.586			    9,8			   11/12	Y
1108	   L	 LEU1108:P	-0.694		  9	-0.945,-0.586			    9,8			   11/12	L
1109	   A	 ALA1109:P	-0.790		  9	-0.952,-0.723			    9,9			   11/12	A
1110	   D	 ASP1110:P	-0.765		  9	-0.945,-0.723			    9,9			   11/12	D
1111	   K	 LYS1111:P	-0.743		  9	-0.945,-0.682			    9,9			   11/12	K
1112	   C	 CYS1112:P	-0.668		  9	-0.945,-0.586			    9,8			   11/12	C
1113	   S	 SER1113:P	-0.488		  8	-0.793,-0.317			    9,7			   11/12	S,T
1114	   S	 SER1114:P	-0.809		  9	-0.952,-0.760			    9,9			   11/12	S
1115	   V	 VAL1115:P	-0.788		  9	-0.952,-0.723			    9,9			   11/12	V
1116	   I	 ILE1116:P	-0.792		  9	-0.952,-0.723			    9,9			   11/12	I
1117	   C	 CYS1117:P	-0.668		  9	-0.945,-0.586			    9,8			   11/12	C
1118	   G	 GLY1118:P	-0.150		  6*	-0.682, 0.122			    9,4			   11/12	G,A
1119	   R	 ARG1119:P	-0.763		  9	-0.945,-0.682			    9,9			   11/12	R
1120	   V	 VAL1120:P	-0.788		  9	-0.952,-0.723			    9,9			   11/12	V
1121	   S	 SER1121:P	-0.809		  9	-0.952,-0.760			    9,9			   11/12	S
1122	   P	 PRO1122:P	-0.711		  9	-0.945,-0.636			    9,8			   11/12	P
1123	   Y	 TYR1123:P	-0.678		  9	-0.945,-0.586			    9,8			   11/12	Y
1124	   Q	 GLN1124:P	-0.767		  9	-0.945,-0.723			    9,9			   11/12	Q
1125	   K	 LYS1125:P	-0.743		  9	-0.945,-0.682			    9,9			   11/12	K
1126	   G	 GLY1126:P	-0.690		  9	-0.945,-0.586			    9,8			   11/12	G
1127	   F	 PHE1127:P	-0.022		  5*	-0.529, 0.279			    8,3			   11/12	F,A,S
1128	   I	 ILE1128:P	-0.792		  9	-0.952,-0.723			    9,9			   11/12	I
1129	   V	 VAL1129:P	-0.788		  9	-0.952,-0.723			    9,9			   11/12	V
1130	   S	 SER1130:P	-0.809		  9	-0.952,-0.760			    9,9			   11/12	S
1131	   S	 SER1131:P	-0.809		  9	-0.952,-0.760			    9,9			   11/12	S
1132	   A	 ALA1132:P	-0.790		  9	-0.952,-0.723			    9,9			   11/12	A
1133	   N	 ASN1133:P	-0.794		  9	-0.952,-0.723			    9,9			   11/12	N
1134	   R	 ARG1134:P	-0.763		  9	-0.945,-0.682			    9,9			   11/12	R
1135	   L	 LEU1135:P	-0.694		  9	-0.945,-0.586			    9,8			   11/12	L
1136	   L	 LEU1136:P	-0.694		  9	-0.945,-0.586			    9,8			   11/12	L
1137	   R	 ARG1137:P	 0.636		  2*	-0.127, 1.004			    6,1			   11/12	K,N,R
1138	   K	 LYS1138:P	-0.743		  9	-0.945,-0.682			    9,9			   11/12	K
1139	   N	 ASN1139:P	-0.400		  7	-0.760,-0.229			    9,6			   11/12	I,N
1140	   T	 THR1140:P	-0.799		  9	-0.952,-0.760			    9,9			   11/12	T
1141	   L	 LEU1141:P	-0.694		  9	-0.945,-0.586			    9,8			   11/12	L
1142	   A	 ALA1142:P	-0.790		  9	-0.952,-0.723			    9,9			   11/12	A
1143	   I	 ILE1143:P	-0.792		  9	-0.952,-0.723			    9,9			   11/12	I
1144	   G	 GLY1144:P	-0.690		  9	-0.945,-0.586			    9,8			   11/12	G
1145	   D	 ASP1145:P	-0.765		  9	-0.945,-0.723			    9,9			   11/12	D
1146	   G	 GLY1146:P	-0.690		  9	-0.945,-0.586			    9,8			   11/12	G
1147	   A	 ALA1147:P	-0.790		  9	-0.952,-0.723			    9,9			   11/12	A
1148	   N	 ASN1148:P	-0.794		  9	-0.952,-0.723			    9,9			   11/12	N
1149	   D	 ASP1149:P	-0.765		  9	-0.945,-0.723			    9,9			   11/12	D
1150	   C	 CYS1150:P	-0.305		  7*	-0.723,-0.012			    9,5			   11/12	R,C
1151	   N	 ASN1151:P	-0.794		  9	-0.952,-0.723			    9,9			   11/12	N
1152	   M	 MET1152:P	-0.785		  9	-0.952,-0.723			    9,9			   11/12	M
1153	   I	 ILE1153:P	-0.792		  9	-0.952,-0.723			    9,9			   11/12	I
1154	   K	 LYS1154:P	-0.425		  7	-0.793,-0.229			    9,6			   11/12	N,K
1155	   M	 MET1155:P	 1.030		  1	 0.122, 1.419			    4,1			   11/12	M,T,R,K
1156	   A	 ALA1156:P	-0.790		  9	-0.952,-0.723			    9,9			   11/12	A
1157	   N	 ASN1157:P	-0.794		  9	-0.952,-0.723			    9,9			   11/12	N
1158	   I	 ILE1158:P	-0.792		  9	-0.952,-0.723			    9,9			   11/12	I
1159	   G	 GLY1159:P	-0.690		  9	-0.945,-0.586			    9,8			   11/12	G
1160	   I	 ILE1160:P	 0.418		  3*	-0.229, 0.701			    6,1			   11/12	V,I
1161	   G	 GLY1161:P	-0.690		  9	-0.945,-0.586			    9,8			   11/12	G
1162	   I	 ILE1162:P	-0.792		  9	-0.952,-0.723			    9,9			   11/12	I
1163	   R	 ARG1163:P	-0.763		  9	-0.945,-0.682			    9,9			   11/12	R
1164	   G	 GLY1164:P	-0.690		  9	-0.945,-0.586			    9,8			   11/12	G
1165	   Q	 GLN1165:P	-0.767		  9	-0.945,-0.723			    9,9			   11/12	Q
1166	   E	 GLU1166:P	-0.750		  9	-0.945,-0.682			    9,9			   11/12	E
1167	   G	 GLY1167:P	-0.690		  9	-0.945,-0.586			    9,8			   11/12	G
1168	   V	 VAL1168:P	-0.788		  9	-0.952,-0.723			    9,9			   11/12	V
1169	   Q	 GLN1169:P	-0.767		  9	-0.945,-0.723			    9,9			   11/12	Q
1170	   A	 ALA1170:P	-0.790		  9	-0.952,-0.723			    9,9			   11/12	A
1171	   F	 PHE1171:P	-0.687		  9	-0.945,-0.586			    9,8			   11/12	F
1172	   N	 ASN1172:P	-0.794		  9	-0.952,-0.723			    9,9			   11/12	N
1173	   S	 SER1173:P	-0.809		  9	-0.952,-0.760			    9,9			   11/12	S
1174	   S	 SER1174:P	-0.809		  9	-0.952,-0.760			    9,9			   11/12	S
1175	   D	 ASP1175:P	-0.765		  9	-0.945,-0.723			    9,9			   11/12	D
1176	   Y	 TYR1176:P	-0.678		  9	-0.945,-0.586			    9,8			   11/12	Y
1177	   G	 GLY1177:P	-0.690		  9	-0.945,-0.586			    9,8			   11/12	G
1178	   I	 ILE1178:P	-0.792		  9	-0.952,-0.723			    9,9			   11/12	I
1179	   S	 SER1179:P	-0.809		  9	-0.952,-0.760			    9,9			   11/12	S
1180	   Q	 GLN1180:P	-0.767		  9	-0.945,-0.723			    9,9			   11/12	Q
1181	   F	 PHE1181:P	-0.687		  9	-0.945,-0.586			    9,8			   11/12	F
1182	   R	 ARG1182:P	-0.763		  9	-0.945,-0.682			    9,9			   11/12	R
1183	   F	 PHE1183:P	-0.687		  9	-0.945,-0.586			    9,8			   11/12	F
1184	   L	 LEU1184:P	-0.694		  9	-0.945,-0.586			    9,8			   11/12	L
1185	   R	 ARG1185:P	 0.147		  4*	-0.466, 0.468			    8,2			   11/12	R,K
1186	   N	 ASN1186:P	-0.794		  9	-0.952,-0.723			    9,9			   11/12	N
1187	   L	 LEU1187:P	-0.694		  9	-0.945,-0.586			    9,8			   11/12	L
1188	   I	 ILE1188:P	-0.201		  6*	-0.682, 0.122			    9,4			   11/12	L,I
1189	   L	 LEU1189:P	-0.694		  9	-0.945,-0.586			    9,8			   11/12	L
1190	   V	 VAL1190:P	-0.422		  7	-0.793,-0.229			    9,6			   11/12	V,I
1191	   H	 HIS1191:P	-0.779		  9	-0.952,-0.723			    9,9			   11/12	H
1192	   G	 GLY1192:P	-0.690		  9	-0.945,-0.586			    9,8			   11/12	G
1193	   R	 ARG1193:P	-0.763		  9	-0.945,-0.682			    9,9			   11/12	R
1194	   L	 LEU1194:P	-0.694		  9	-0.945,-0.586			    9,8			   11/12	L
1195	   S	 SER1195:P	-0.809		  9	-0.952,-0.760			    9,9			   11/12	S
1196	   Y	 TYR1196:P	-0.678		  9	-0.945,-0.586			    9,8			   11/12	Y
1197	   R	 ARG1197:P	 0.476		  2*	-0.229, 1.004			    6,1			   11/12	R,T,A
1198	   R	 ARG1198:P	-0.763		  9	-0.945,-0.682			    9,9			   11/12	R
1199	   I	 ILE1199:P	-0.792		  9	-0.952,-0.723			    9,9			   11/12	I
1200	   S	 SER1200:P	-0.809		  9	-0.952,-0.760			    9,9			   11/12	S
1201	   K	 LYS1201:P	-0.743		  9	-0.945,-0.682			    9,9			   11/12	K
1202	   L	 LEU1202:P	-0.694		  9	-0.945,-0.586			    9,8			   11/12	L
1203	   V	 VAL1203:P	-0.788		  9	-0.952,-0.723			    9,9			   11/12	V
1204	   V	 VAL1204:P	-0.788		  9	-0.952,-0.723			    9,9			   11/12	V
1205	   Y	 TYR1205:P	-0.678		  9	-0.945,-0.586			    9,8			   11/12	Y
1206	   M	 MET1206:P	-0.785		  9	-0.952,-0.723			    9,9			   11/12	M
1207	   F	 PHE1207:P	-0.687		  9	-0.945,-0.586			    9,8			   11/12	F
1208	   Y	 TYR1208:P	-0.678		  9	-0.945,-0.586			    9,8			   11/12	Y
1209	   K	 LYS1209:P	-0.743		  9	-0.945,-0.682			    9,9			   11/12	K
1210	   N	 ASN1210:P	-0.794		  9	-0.952,-0.723			    9,9			   11/12	N
1211	   I	 ILE1211:P	-0.434		  7	-0.793,-0.229			    9,6			   11/12	M,I
1212	   V	 VAL1212:P	-0.788		  9	-0.952,-0.723			    9,9			   11/12	V
1213	   F	 PHE1213:P	-0.144		  6*	-0.682, 0.122			    9,4			   11/12	F,L
1214	   I	 ILE1214:P	-0.445		  7	-0.793,-0.229			    9,6			   11/12	V,I
1215	   F	 PHE1215:P	-0.687		  9	-0.945,-0.586			    9,8			   11/12	F
1216	   P	 PRO1216:P	-0.711		  9	-0.945,-0.636			    9,8			   11/12	P
1217	   L	 LEU1217:P	-0.694		  9	-0.945,-0.586			    9,8			   11/12	L
1218	   F	 PHE1218:P	-0.687		  9	-0.945,-0.586			    9,8			   11/12	F
1219	   I	 ILE1219:P	-0.444		  7	-0.793,-0.229			    9,6			   11/12	M,I
1220	   Y	 TYR1220:P	-0.132		  6*	-0.682, 0.122			    9,4			   11/12	Y,F
1221	   G	 GLY1221:P	-0.690		  9	-0.945,-0.586			    9,8			   11/12	G
1222	   A	 ALA1222:P	-0.500		  8	-0.793,-0.317			    9,7			   11/12	A,S
1223	   I	 ILE1223:P	 0.887		  1*	-0.012, 1.419			    5,1			   11/12	L,I
1224	   S	 SER1224:P	-0.809		  9	-0.952,-0.760			    9,9			   11/12	S
1225	   L	 LEU1225:P	-0.694		  9	-0.945,-0.586			    9,8			   11/12	L
1226	   Y	 TYR1226:P	-0.678		  9	-0.945,-0.586			    9,8			   11/12	Y
1227	   S	 SER1227:P	-0.809		  9	-0.952,-0.760			    9,9			   11/12	S
1228	   G	 GLY1228:P	-0.690		  9	-0.945,-0.586			    9,8			   11/12	G
1229	   Q	 GLN1229:P	-0.767		  9	-0.945,-0.723			    9,9			   11/12	Q
1230	   K	 LYS1230:P	-0.743		  9	-0.945,-0.682			    9,9			   11/12	K
1231	   I	 ILE1231:P	-0.792		  9	-0.952,-0.723			    9,9			   11/12	I
1232	   Y	 TYR1232:P	-0.678		  9	-0.945,-0.586			    9,8			   11/12	Y
1233	   F	 PHE1233:P	 0.590		  2*	-0.229, 1.004			    6,1			   11/12	F,Y
1234	   E	 GLU1234:P	-0.750		  9	-0.945,-0.682			    9,9			   11/12	E
1235	   I	 ILE1235:P	 0.447		  3*	-0.317, 1.004			    7,1			   11/12	F,I
1236	   L	 LEU1236:P	-0.694		  9	-0.945,-0.586			    9,8			   11/12	L
1237	   L	 LEU1237:P	-0.694		  9	-0.945,-0.586			    9,8			   11/12	L
1238	   H	 HIS1238:P	-0.403		  7	-0.760,-0.229			    9,6			   11/12	Q,H
1239	   S	 SER1239:P	 0.377		  3*	-0.317, 0.701			    7,1			   11/12	V,L,S
1240	   Y	 TYR1240:P	 0.827		  1*	-0.012, 1.419			    5,1			   11/12	F,H,Y
1241	   N	 ASN1241:P	-0.794		  9	-0.952,-0.723			    9,9			   11/12	N
1242	   V	 VAL1242:P	 0.103		  4*	-0.466, 0.468			    8,2			   11/12	V,I
1243	   L	 LEU1243:P	 2.202		  1	 0.701, 3.932			    1,1			   11/12	M,L,I,V,F
1244	   F	 PHE1244:P	-0.687		  9	-0.945,-0.586			    9,8			   11/12	F
1245	   T	 THR1245:P	-0.799		  9	-0.952,-0.760			    9,9			   11/12	T
1246	   S	 SER1246:P	 1.091		  1	 0.279, 1.419			    3,1			   11/12	A,S,C
1247	   L	 LEU1247:P	 0.640		  2*	-0.127, 1.004			    6,1			   11/12	L,I,V
1248	   P	 PRO1248:P	-0.711		  9	-0.945,-0.636			    9,8			   11/12	P
1249	   I	 ILE1249:P	-0.439		  7	-0.793,-0.229			    9,6			   11/12	I,V
1250	   I	 ILE1250:P	 0.818		  1*	-0.012, 1.419			    5,1			   11/12	V,I
1251	   I	 ILE1251:P	-0.372		  7	-0.760,-0.127			    9,6			   11/12	I,A
1252	   L	 LEU1252:P	 0.164		  4*	-0.466, 0.468			    8,2			   11/12	H,L,F
1253	   A	 ALA1253:P	-0.790		  9	-0.952,-0.723			    9,9			   11/12	A
1254	   I	 ILE1254:P	-0.446		  7	-0.793,-0.229			    9,6			   11/12	I,V
1255	   L	 LEU1255:P	-0.694		  9	-0.945,-0.586			    9,8			   11/12	L
1256	   D	 ASP1256:P	-0.765		  9	-0.945,-0.723			    9,9			   11/12	D
1257	   K	 LYS1257:P	-0.255		  6*	-0.723,-0.012			    9,5			   11/12	K,Q
1258	   D	 ASP1258:P	-0.765		  9	-0.945,-0.723			    9,9			   11/12	D
1259	   V	 VAL1259:P	-0.300		  7*	-0.723,-0.012			    9,5			   11/12	I,V
1260	   S	 SER1260:P	-0.495		  8	-0.793,-0.317			    9,7			   11/12	S,N
1261	   I	 ILE1261:P	-0.101		  6*	-0.682, 0.279			    9,3			   11/12	L,I
1262	   N	 ASN1262:P	-0.457		  7	-0.793,-0.229			    9,6			   11/12	N,K
1263	   T	 THR1263:P	-0.799		  9	-0.952,-0.760			    9,9			   11/12	T
1264	   A	 ALA1264:P	-0.790		  9	-0.952,-0.723			    9,9			   11/12	A
1265	   L	 LEU1265:P	-0.166		  6*	-0.682, 0.122			    9,4			   11/12	M,L
1266	   K	 LYS1266:P	 0.750		  1*	-0.012, 1.419			    5,1			   11/12	V,E,K,N
1267	   N	 ASN1267:P	 0.017		  5*	-0.529, 0.279			    8,3			   11/12	T,K,N
1268	   P	 PRO1268:P	-0.711		  9	-0.945,-0.636			    9,8			   11/12	P
1269	   C	 CYS1269:P	 1.011		  1	 0.122, 1.419			    4,1			   11/12	S,C,F,V,N
1270	   L	 LEU1270:P	-0.694		  9	-0.945,-0.586			    9,8			   11/12	L
1271	   Y	 TYR1271:P	-0.678		  9	-0.945,-0.586			    9,8			   11/12	Y
1272	   K	 LYS1272:P	-0.743		  9	-0.945,-0.682			    9,9			   11/12	K
1273	   L	 LEU1273:P	-0.694		  9	-0.945,-0.586			    9,8			   11/12	L
1274	   G	 GLY1274:P	-0.690		  9	-0.945,-0.586			    9,8			   11/12	G
1275	   I	 ILE1275:P	-0.792		  9	-0.952,-0.723			    9,9			   11/12	I
1276	   H	 HIS1276:P	 0.818		  1*	-0.012, 1.419			    5,1			   11/12	Y,F,H
1277	   N	 ASN1277:P	-0.416		  7	-0.760,-0.229			    9,6			   11/12	H,N
1278	   F	 PHE1278:P	-0.116		  6*	-0.682, 0.122			    9,4			   11/12	F,Y
1279	   Y	 TYR1279:P	-0.678		  9	-0.945,-0.586			    9,8			   11/12	Y
1280	   F	 PHE1280:P	-0.687		  9	-0.945,-0.586			    9,8			   11/12	F
1281	   N	 ASN1281:P	-0.794		  9	-0.952,-0.723			    9,9			   11/12	N
1282	   I	 ILE1282:P	-0.792		  9	-0.952,-0.723			    9,9			   11/12	I
1283	   N	 ASN1283:P	 0.090		  5*	-0.466, 0.468			    8,2			   11/12	R,S,N
1284	   K	 LYS1284:P	-0.418		  7	-0.793,-0.229			    9,6			   11/12	K,T
1285	   F	 PHE1285:P	-0.687		  9	-0.945,-0.586			    9,8			   11/12	F
1286	   I	 ILE1286:P	 0.142		  4*	-0.396, 0.468			    7,2			   11/12	V,I
1287	   S	 SER1287:P	-0.809		  9	-0.952,-0.760			    9,9			   11/12	S
1288	   W	 TRP1288:P	-0.557		  8	-0.935,-0.396			    9,7			   11/12	W
1289	   V	 VAL1289:P	-0.788		  9	-0.952,-0.723			    9,9			   11/12	V
1290	   L	 LEU1290:P	 0.524		  2*	-0.229, 1.004			    6,1			   11/12	M,I,L
1291	   N	 ASN1291:P	-0.794		  9	-0.952,-0.723			    9,9			   11/12	N
1292	   S	 SER1292:P	-0.809		  9	-0.952,-0.760			    9,9			   11/12	S
1293	   L	 LEU1293:P	-0.694		  9	-0.945,-0.586			    9,8			   11/12	L
1294	   F	 PHE1294:P	-0.687		  9	-0.945,-0.586			    9,8			   11/12	F
1295	   H	 HIS1295:P	-0.411		  7	-0.760,-0.229			    9,6			   11/12	Q,H
1296	   G	 GLY1296:P	-0.690		  9	-0.945,-0.586			    9,8			   11/12	G
1297	   L	 LEU1297:P	 0.368		  3*	-0.396, 0.701			    7,1			   11/12	L,C,S
1298	   L	 LEU1298:P	-0.365		  7	-0.760,-0.127			    9,6			   11/12	V,L
1299	   V	 VAL1299:P	-0.788		  9	-0.952,-0.723			    9,9			   11/12	V
1300	   F	 PHE1300:P	-0.687		  9	-0.945,-0.586			    9,8			   11/12	F
1301	   S	 SER1301:P	 0.966		  1*	-0.012, 1.419			    5,1			   11/12	L,I,M,S
1302	   I	 ILE1302:P	-0.051		  5*	-0.529, 0.279			    8,3			   11/12	L,I
1303	   P	 PRO1303:P	-0.711		  9	-0.945,-0.636			    9,8			   11/12	P
1304	   L	 LEU1304:P	-0.694		  9	-0.945,-0.586			    9,8			   11/12	L
1305	   Y	 TYR1305:P	-0.678		  9	-0.945,-0.586			    9,8			   11/12	Y
1306	   F	 PHE1306:P	-0.687		  9	-0.945,-0.586			    9,8			   11/12	F
1307	   L	 LEU1307:P	-0.694		  9	-0.945,-0.586			    9,8			   11/12	L
1308	   A	 ALA1308:P	-0.480		  8	-0.793,-0.317			    9,7			   11/12	S,A
1309	   Y	 TYR1309:P	-0.678		  9	-0.945,-0.586			    9,8			   11/12	Y
1310	   Y	 TYR1310:P	-0.678		  9	-0.945,-0.586			    9,8			   11/12	Y
1311	   N	 ASN1311:P	-0.794		  9	-0.952,-0.723			    9,9			   11/12	N
1312	   I	 ILE1312:P	-0.438		  7	-0.793,-0.229			    9,6			   11/12	I,V
1313	   P	 PRO1313:P	-0.711		  9	-0.945,-0.636			    9,8			   11/12	P
1314	   S	 SER1314:P	-0.162		  6*	-0.586, 0.122			    8,4			   11/12	T,S,N
1315	   S	 SER1315:P	 0.235		  4*	-0.317, 0.701			    7,1			   11/12	P,A,S,L
1316	   T	 THR1316:P	 0.193		  4*	-0.396, 0.468			    7,2			   11/12	T,A,D
1317	   G	 GLY1317:P	-0.690		  9	-0.945,-0.586			    9,8			   11/12	G
1318	   E	 GLU1318:P	 0.966		  1*	-0.012, 1.419			    5,1			   11/12	T,I,E
1319	   P	 PRO1319:P	-0.711		  9	-0.945,-0.636			    9,8			   11/12	P
1320	   F	 PHE1320:P	 0.461		  3*	-0.317, 1.004			    7,1			   11/12	F,Y
1321	   D	 ASP1321:P	-0.765		  9	-0.945,-0.723			    9,9			   11/12	D
1322	   L	 LEU1322:P	 0.674		  1*	-0.127, 1.004			    6,1			   11/12	M,I,L
1323	   W	 TRP1323:P	-0.557		  8	-0.935,-0.396			    9,7			   11/12	W
1324	   S	 SER1324:P	-0.470		  8	-0.793,-0.317			    9,7			   11/12	S,T
1325	   I	 ILE1325:P	-0.439		  7	-0.793,-0.229			    9,6			   11/12	I,V
1326	   G	 GLY1326:P	-0.690		  9	-0.945,-0.586			    9,8			   11/12	G
1327	   C	 CYS1327:P	 0.277		  4*	-0.396, 0.701			    7,1			   11/12	S,T,C
1328	   V	 VAL1328:P	-0.432		  7	-0.793,-0.229			    9,6			   11/12	V,A
1329	   T	 THR1329:P	-0.799		  9	-0.952,-0.760			    9,9			   11/12	T
1330	   Y	 TYR1330:P	-0.099		  6*	-0.682, 0.279			    9,3			   11/12	Y,F
1331	   L	 LEU1331:P	-0.134		  6*	-0.682, 0.122			    9,4			   11/12	F,L
1332	   L	 LEU1332:P	-0.694		  9	-0.945,-0.586			    9,8			   11/12	L
1333	   S	 SER1333:P	-0.125		  6*	-0.586, 0.122			    8,4			   11/12	A,S,T
1334	   V	 VAL1334:P	-0.788		  9	-0.952,-0.723			    9,9			   11/12	V
1335	   V	 VAL1335:P	 0.506		  2*	-0.317, 1.004			    7,1			   11/12	V,I,L
1336	   I	 ILE1336:P	 0.142		  4*	-0.396, 0.468			    7,2			   11/12	I,V
1337	   V	 VAL1337:P	-0.788		  9	-0.952,-0.723			    9,9			   11/12	V
1338	   N	 ASN1338:P	-0.794		  9	-0.952,-0.723			    9,9			   11/12	N
1339	   I	 ILE1339:P	 2.255		  1	 0.701, 3.932			    1,1			   11/12	L,I,T,F
1340	   K	 LYS1340:P	-0.743		  9	-0.945,-0.682			    9,9			   11/12	K
1341	   I	 ILE1341:P	-0.430		  7	-0.793,-0.229			    9,6			   11/12	I,V
1342	   L	 LEU1342:P	-0.694		  9	-0.945,-0.586			    9,8			   11/12	L
1343	   L	 LEU1343:P	-0.147		  6*	-0.682, 0.122			    9,4			   11/12	F,L
1344	   E	 GLU1344:P	-0.750		  9	-0.945,-0.682			    9,9			   11/12	E
1345	   T	 THR1345:P	-0.799		  9	-0.952,-0.760			    9,9			   11/12	T
1346	   Y	 TYR1346:P	-0.678		  9	-0.945,-0.586			    9,8			   11/12	Y
1347	   Y	 TYR1347:P	 0.561		  2*	-0.229, 1.004			    6,1			   11/12	C,H,Y
1348	   L	 LEU1348:P	-0.694		  9	-0.945,-0.586			    9,8			   11/12	L
1349	   N	 ASN1349:P	-0.794		  9	-0.952,-0.723			    9,9			   11/12	N
1350	   T	 THR1350:P	 0.913		  1	 0.122, 1.419			    4,1			   11/12	V,T,I,M
1351	   S	 SER1351:P	-0.198		  6*	-0.682, 0.122			    9,4			   11/12	L,S
1352	   P	 PRO1352:P	-0.206		  6*	-0.682, 0.122			    9,4			   11/12	Q,P
1353	   I	 ILE1353:P	-0.383		  7	-0.760,-0.127			    9,6			   11/12	L,I
1354	   I	 ILE1354:P	 1.165		  1	 0.279, 1.419			    3,1			   11/12	T,V,I,A,S
1355	   G	 GLY1355:P	-0.043		  5*	-0.529, 0.279			    8,3			   11/12	G,A
1356	   V	 VAL1356:P	-0.435		  7	-0.793,-0.229			    9,6			   11/12	I,V
1357	   S	 SER1357:P	 0.037		  5*	-0.529, 0.279			    8,3			   11/12	F,A,S
1358	   F	 PHE1358:P	 0.338		  3*	-0.317, 0.701			    7,1			   11/12	M,L,F
1359	   S	 SER1359:P	-0.809		  9	-0.952,-0.760			    9,9			   11/12	S
1360	   I	 ILE1360:P	-0.443		  7	-0.793,-0.229			    9,6			   11/12	I,M
1361	   I	 ILE1361:P	 0.414		  3*	-0.317, 1.004			    7,1			   11/12	I,F,L
1362	   S	 SER1362:P	 0.211		  4*	-0.317, 0.468			    7,2			   11/12	A,S
1363	   F	 PHE1363:P	-0.687		  9	-0.945,-0.586			    9,8			   11/12	F
1364	   I	 ILE1364:P	 0.421		  3*	-0.229, 0.701			    6,1			   11/12	L,V,I
1365	   V	 VAL1365:P	 0.806		  1*	-0.012, 1.419			    5,1			   11/12	V,I,L
1366	   T	 THR1366:P	 0.298		  3*	-0.396, 0.701			    7,1			   11/12	T,L,M
1367	   A	 ALA1367:P	 1.059		  1	 0.122, 1.419			    4,1			   11/12	V,S,A
1368	   I	 ILE1368:P	 1.592		  1	 0.468, 2.082			    2,1			   11/12	I,V,T,A,S
1369	   A	 ALA1369:P	 0.407		  3*	-0.229, 0.701			    6,1			   11/12	S,A
1370	   F	 PHE1370:P	-0.097		  6*	-0.682, 0.279			    9,3			   11/12	C,F
1371	   S	 SER1371:P	-0.809		  9	-0.952,-0.760			    9,9			   11/12	S
1372	   F	 PHE1372:P	-0.687		  9	-0.945,-0.586			    9,8			   11/12	F
1373	   T	 THR1373:P	-0.048		  5*	-0.529, 0.279			    8,3			   11/12	T,I,M
1374	   G	 GLY1374:P	 0.613		  2*	-0.229, 1.004			    6,1			   11/12	Y,G,C
1375	   I	 ILE1375:P	 0.479		  2*	-0.317, 1.004			    7,1			   11/12	V,I,F
1376	   G	 GLY1376:P	-0.690		  9	-0.945,-0.586			    9,8			   11/12	G
1377	   N	 ASN1377:P	 0.552		  2*	-0.127, 1.004			    6,1			   11/12	N,T,S
1378	   K	 LYS1378:P	 0.461		  3*	-0.229, 1.004			    6,1			   11/12	K,N,I,S
1379	   S	 SER1379:P	 0.024		  5*	-0.466, 0.279			    8,3			   11/12	N,S,H
1380	   F	 PHE1380:P	 0.701		  1*	-0.127, 1.419			    6,1			   11/12	I,F,L
1381	   L	 LEU1381:P	-0.694		  9	-0.945,-0.586			    9,8			   11/12	L
1382	   G	 GLY1382:P	-0.690		  9	-0.945,-0.586			    9,8			   11/12	G
1383	   V	 VAL1383:P	-0.409		  7	-0.760,-0.229			    9,6			   11/12	T,V
1384	   A	 ALA1384:P	-0.006		  5*	-0.529, 0.279			    8,3			   11/12	V,I,A
1385	   T	 THR1385:P	 0.808		  1*	-0.012, 1.419			    5,1			   11/12	V,T,I
1386	   L	 LEU1386:P	 0.279		  3*	-0.396, 0.701			    7,1			   11/12	L,I,Y
1387	   L	 LEU1387:P	-0.694		  9	-0.945,-0.586			    9,8			   11/12	L
1388	   A	 ALA1388:P	-0.007		  5*	-0.529, 0.279			    8,3			   11/12	A,V
1389	   T	 THR1389:P	 2.037		  1	 0.701, 3.932			    1,1			   11/12	K,R,Q,T
1390	   S	 SER1390:P	-0.809		  9	-0.952,-0.760			    9,9			   11/12	S
1391	   L	 LEU1391:P	-0.694		  9	-0.945,-0.586			    9,8			   11/12	L
1392	   R	 ARG1392:P	-0.763		  9	-0.945,-0.682			    9,9			   11/12	R
1393	   F	 PHE1393:P	-0.687		  9	-0.945,-0.586			    9,8			   11/12	F
1394	   W	 TRP1394:P	-0.557		  8	-0.935,-0.396			    9,7			   11/12	W
1395	   L	 LEU1395:P	-0.694		  9	-0.945,-0.586			    9,8			   11/12	L
1396	   V	 VAL1396:P	-0.788		  9	-0.952,-0.723			    9,9			   11/12	V
1397	   F	 PHE1397:P	 0.691		  1*	-0.127, 1.004			    6,1			   11/12	V,F,L,S
1398	   V	 VAL1398:P	 0.511		  2*	-0.317, 1.004			    7,1			   11/12	L,V,I
1399	   L	 LEU1399:P	-0.694		  9	-0.945,-0.586			    9,8			   11/12	L
1400	   G	 GLY1400:P	 0.440		  3*	-0.317, 1.004			    7,1			   11/12	S,V,G
1401	   L	 LEU1401:P	-0.148		  6*	-0.682, 0.122			    9,4			   11/12	I,L
1402	   F	 PHE1402:P	-0.687		  9	-0.945,-0.586			    9,8			   11/12	F
1403	   A	 ALA1403:P	 0.012		  5*	-0.529, 0.279			    8,3			   11/12	A,T,V
1404	   A	 ALA1404:P	 0.303		  3*	-0.317, 0.701			    7,1			   11/12	T,S,A
1405	   L	 LEU1405:P	-0.694		  9	-0.945,-0.586			    9,8			   11/12	L
1406	   T	 THR1406:P	-0.104		  6*	-0.586, 0.122			    8,4			   11/12	S,T,L
1407	   R	 ARG1407:P	-0.763		  9	-0.945,-0.682			    9,9			   11/12	R
1408	   D	 ASP1408:P	-0.765		  9	-0.945,-0.723			    9,9			   11/12	D
1409	   Y	 TYR1409:P	-0.093		  6*	-0.636, 0.279			    8,3			   11/12	Y,F
1410	   V	 VAL1410:P	-0.084		  5*	-0.529, 0.279			    8,3			   11/12	I,V
1411	   Y	 TYR1411:P	 1.059		  1	 0.122, 1.419			    4,1			   11/12	F,Y
1412	   K	 LYS1412:P	-0.743		  9	-0.945,-0.682			    9,9			   11/12	K
1413	   V	 VAL1413:P	-0.788		  9	-0.952,-0.723			    9,9			   11/12	V
1414	   Y	 TYR1414:P	 0.627		  2*	-0.229, 1.004			    6,1			   11/12	F,I,Y
1415	   K	 LYS1415:P	-0.743		  9	-0.945,-0.682			    9,9			   11/12	K
1416	   K	 LYS1416:P	-0.351		  7	-0.760,-0.127			    9,6			   11/12	K,R
1417	   N	 ASN1417:P	-0.794		  9	-0.952,-0.723			    9,9			   11/12	N
1418	   F	 PHE1418:P	-0.687		  9	-0.945,-0.586			    9,8			   11/12	F
1419	   C	 CYS1419:P	 0.072		  5*	-0.466, 0.468			    8,2			   11/12	C,N,Y
1420	   P	 PRO1420:P	-0.711		  9	-0.945,-0.636			    9,8			   11/12	P
1421	   E	 GLU1421:P	-0.750		  9	-0.945,-0.682			    9,9			   11/12	E
1422	   A	 ALA1422:P	-0.061		  5*	-0.529, 0.279			    8,3			   11/12	A,V,I
1423	   Y	 TYR1423:P	-0.678		  9	-0.945,-0.586			    9,8			   11/12	Y
1424	   H	 HIS1424:P	-0.779		  9	-0.952,-0.723			    9,9			   11/12	H
1425	   L	 LEU1425:P	 0.904		  1*	-0.012, 1.419			    5,1			   11/12	F,I,L
1426	   L	 LEU1426:P	-0.694		  9	-0.945,-0.586			    9,8			   11/12	L
1427	   Q	 GLN1427:P	 0.856		  1*	-0.012, 1.419			    5,1			   11/12	Q,V,L
1428	   D	 ASP1428:P	-0.356		  7	-0.760,-0.127			    9,6			   11/12	E,D
1429	   E	 GLU1429:P	 0.503		  2*	-0.229, 1.004			    6,1			   11/12	K,Q,H,E
1430	   E	 GLU1430:P	-0.750		  9	-0.945,-0.682			    9,9			   11/12	E
1431	   D	 ASP1431:P	 0.246		  4*	-0.396, 0.701			    7,1			   11/12	D,E,I
1432	   K	 LYS1432:P	 2.110		  1	 0.701, 3.932			    1,1			   11/12	E,A,T,K,N
1433	   I	 ILE1433:P	 1.913		  1	 0.701, 3.932			    1,1			   11/12	I,Q,N,P,K
1434	   E	 GLU1434:P	 2.673		  1	 1.004, 3.932			    1,1			   11/12	K,S,E,D,I
1435	   N	 ASN1435:P	-0.153		  6*	-0.682, 0.122			    9,4			   11/12	G,N
1436	   P	 PRO1436:P	 2.679		  1	 1.004, 3.932			    1,1			   11/12	P,K,T,E,A,M
1437	   K	 LYS1437:P	 0.744		  1*	-0.012, 1.004			    5,1			   11/12	T,S,N,K
1438	   N	 ASN1438:P	 1.633		  1	 0.468, 2.082			    2,1			   10/12	A,D,H,N,K
1439	   I	 ILE1439:P	 0.339		  3*	-0.317, 0.701			    7,1			   11/12	V,I,L
1440	   Q	 GLN1440:P	 1.057		  1	 0.122, 1.419			    4,1			   11/12	N,E,D,Q
1441	   H	 HIS1441:P	 0.920		  1	 0.122, 1.419			    4,1			   11/12	Y,P,H,Q
1442	   N	 ASN1442:P	 2.037		  1	 0.701, 3.932			    1,1			   11/12	K,N,L,I,S
1443	   S	 SER1443:P	 1.353		  1	 0.279, 2.082			    3,1			   11/12	S,T,I,Y,K,N
1444	   R	 ARG1444:P	 2.803		  1	 1.419, 3.932			    1,1			   11/12	L,R,D,S,P,K
1445	   S	 SER1445:P	 1.170		  1	 0.279, 1.419			    3,1			   11/12	G,N,D,S,C
1446	   S	 SER1446:P	 1.997		  1	 0.701, 2.082			    1,1			   11/12	N,P,T,S,E,D
1447	   N	 ASN1447:P	 1.866		  1	 0.468, 3.932			    2,1			   11/12	N,H,C,F
1448	   N	 ASN1448:P	 1.167		  1	 0.279, 1.419			    3,1			   11/12	Q,E,K,N
1449	   I	 ILE1449:P	 3.517		  1	 2.082, 3.932			    1,1			   11/12	N,K,I,V,M,D,E
1450	   E	 GLU1450:P	 1.079		  1	 0.122, 1.419			    4,1			   11/12	E,D,K
1451	   E	 GLU1451:P	 0.695		  1*	-0.127, 1.004			    6,1			   11/12	K,D,E,T
1452	   M	 MET1452:P	 1.302		  1	 0.279, 2.082			    3,1			   10/12	T,I,M,Y
1453	   K	 LYS1453:P	-0.247		  6*	-0.723,-0.012			    9,5			   10/12	K,R
1454	   P	 PRO1454:P	 1.487		  1	 0.279, 2.082			    3,1			   10/12	N,P,S,I
1455	   S	 SER1455:P	 0.476		  2*	-0.317, 1.004			    7,1			   10/12	S,M,E
1456	   K	 LYS1456:P	-0.234		  6*	-0.723,-0.012			    9,5			   10/12	K,R
1457	   S	 SER1457:P	-0.372		  7	-0.760,-0.127			    9,6			   10/12	S,C
1458	   E	 GLU1458:P	 0.301		  3*	-0.396, 0.701			    7,1			   10/12	K,E,D
1459	   L	 LEU1459:P	 0.042		  5*	-0.466, 0.279			    8,3			   10/12	S,L,F
1460	   M	 MET1460:P	 0.400		  3*	-0.317, 0.701			    7,1			   10/12	F,L,M
1461	   G	 GLY1461:P	-0.670		  9	-0.945,-0.586			    9,8			   10/12	G
1462	   Y	 TYR1462:P	-0.657		  9	-0.935,-0.586			    9,8			   10/12	Y
1463	   A	 ALA1463:P	-0.774		  9	-0.952,-0.723			    9,9			   10/12	A
1464	   F	 PHE1464:P	-0.667		  9	-0.945,-0.586			    9,8			   10/12	F
1465	   S	 SER1465:P	-0.795		  9	-0.952,-0.760			    9,9			   10/12	S
1466	   E	 GLU1466:P	-0.731		  9	-0.945,-0.636			    9,8			   10/12	E
1467	   A	 ALA1467:P	-0.385		  7	-0.760,-0.127			    9,6			   10/12	V,A
1468	   D	 ASP1468:P	-0.747		  9	-0.945,-0.682			    9,9			   10/12	D
1469	   P	 PRO1469:P	-0.691		  9	-0.945,-0.586			    9,8			   10/12	P
1470	   V	 VAL1470:P	 0.047		  5*	-0.466, 0.468			    8,2			   10/12	A,V,T
1471	   C	 CYS1471:P	-0.647		  8	-0.935,-0.529			    9,8			   10/12	C
1472	   V	 VAL1472:P	-0.186		  6*	-0.682, 0.122			    9,4			   10/12	V,I
1473	   N	 ASN1473:P	 0.712		  1*	-0.127, 1.004			    6,1			   10/12	H,Q,K,N
1474	   F	 PHE1474:P	-0.078		  5*	-0.636, 0.279			    8,3			   10/12	L,F
1475	   I	 ILE1475:P	-0.776		  9	-0.952,-0.723			    9,9			   10/12	I
1476	   R	 ARG1476:P	-0.746		  9	-0.945,-0.682			    9,9			   10/12	R
1477	   K	 LYS1477:P	-0.241		  6*	-0.723,-0.012			    9,5			   10/12	K,Q
1478	   Q	 GLN1478:P	-0.750		  9	-0.945,-0.682			    9,9			   10/12	Q
1479	   D	 ASP1479:P	-0.782		  9	-0.952,-0.723			    9,9			   11/12	D
1480	   K	 LYS1480:P	 0.218		  4*	-0.396, 0.701			    7,1			   11/12	N,K,S
1481	   L	 LEU1481:P	 0.070		  5*	-0.466, 0.468			    8,2			   11/12	M,L,H
1482	   I	 ILE1482:P	-0.338		  7	-0.723,-0.127			    9,6			   11/12	I,A


*Below the confidence cut-off - The calculations for this site were performed on less than 6 non-gaped homologue sequences,
or the confidence interval for the estimated score is equal to- or larger than- 4 color grades.
