# Supplementary material for: In Silico Assessment of the Lipid Fingerprint Signature of ATP2, the Essential P4-ATPase of Malaria Parasites
Source: Membranes (Basel). 2022 Jul 12;12(7):702. doi: 10.3390/membranes12070702 (PMC9325222; doi:10.3390/membranes12070702)
Supplement: Supplementary file 1 [file membranes-12-00702-s001.zip › Supplementary_Material_2_(PcATP2_POPI_PyLipid_Analysis).xlsx]

## Sheet: Replica_2PyLipid_dataset
Columna1	Residue	Residue ID	Duration	Duration std	Occupancy	Occupancy std	Lipid Count	Lipid Count std	Koff	Residence Time	R Squared	Koff Bootstrap avg	R Squared Bootstrap avg	Binding Site ID	Binding Site Duration	Binding Site Occupancy	Binding Site Lipid Count	Binding Site Koff	Binding Site Koff Bootstrap avg	Binding Site Residence Time	Binding Site R Squared	Binding Site R Squared Bootstrap avg	Binding Site Pose RMSD
1406	1407ARG	1406	0.08691756272401434	0.5135488623921881	55.81767293082767	0.0	1.1955587392550144	0.0	0.24328061306232365	4.110479612051208	0.9254885046948217	4.300919827104375	0.9531430979466403	11	0.0659620596205962	90.32387045181927	1.795484727755644	0.23915816372444504	2.2490113970908734	4.181333325305956	0.9665382048439352	0.9293507124841389	0.5187162871822346
1339	1340LYS	1339	0.4043478260869566	1.5209117005126052	20.991603358656537	0.0	1.0	0.0	0.2734341176003338	3.6571880962625682	0.9524581970282416	0.5958405418969229	0.9547968989174599	11	0.0659620596205962	90.32387045181927	1.795484727755644	0.23915816372444504	2.2490113970908734	4.181333325305956	0.9665382048439352	0.9293507124841389	0.5187162871822346
1294	1295HIS	1294	0.7763636363636363	1.8070381226912462	21.91123550579768	0.0	1.0036496350364963	0.0	0.3617460967821658	2.764369840878129	0.9741479087519801	13.676557912383862	0.9689971941789114	11	0.0659620596205962	90.32387045181927	1.795484727755644	0.23915816372444504	2.2490113970908734	4.181333325305956	0.9665382048439352	0.9293507124841389	0.5187162871822346
1403	1404ALA	1403	0.6883333333333334	1.2130734611812353	14.954018392642944	0.0	1.0	0.0	0.7840673949973653	1.2754005668139794	0.9875245896895529	0.8381183629615527	0.9832381525011511	11	0.0659620596205962	90.32387045181927	1.795484727755644	0.23915816372444504	2.2490113970908734	4.181333325305956	0.9665382048439352	0.9293507124841389	0.5187162871822346
1279	1280PHE	1279	0.1316393442622951	0.20922323420384636	16.273490603758496	0.0	1.0024570024570025	0.0	0.8287479786502404	1.2066394437892605	0.9983476508878577	3.191880377248825	0.9970069301437601	11	0.0659620596205962	90.32387045181927	1.795484727755644	0.23915816372444504	2.2490113970908734	4.181333325305956	0.9665382048439352	0.9293507124841389	0.5187162871822346
1287	1288TRP	1287	0.11745562130177516	0.39089645049908	47.900839664134345	0.0	1.0993322203672788	0.0	0.8535712995834613	1.171548294194047	0.9600923580323067	0.749335438733908	0.9760098623008193	11	0.0659620596205962	90.32387045181927	1.795484727755644	0.23915816372444504	2.2490113970908734	4.181333325305956	0.9665382048439352	0.9293507124841389	0.5187162871822346
1207	1208TYR	1207	0.4127272727272727	0.7832054288637516	11.915233906437425	0.0	1.0033557046979866	0.0	0.9622143344859155	1.0392694893017493	0.9916877705738081	1.2188526949779313	0.991730384493264	11	0.0659620596205962	90.32387045181927	1.795484727755644	0.23915816372444504	2.2490113970908734	4.181333325305956	0.9665382048439352	0.9293507124841389	0.5187162871822346
1407	1408ASP	1407	0.17480769230769233	0.41221955681135686	14.47421031587365	0.0	1.0	0.0	1.3135017460267973	0.761323692964165	0.9975742970252918	1.7688175943810052	0.9916992948843504	11	0.0659620596205962	90.32387045181927	1.795484727755644	0.23915816372444504	2.2490113970908734	4.181333325305956	0.9665382048439352	0.9293507124841389	0.5187162871822346
1343	1344GLU	1343	0.10559322033898305	0.11841139412708958	10.875649740103958	0.0	1.0	0.0	1.452053586849071	0.68867981805684	0.9989089683932394	5.5223874135707565	0.998725513414799	11	0.0659620596205962	90.32387045181927	1.795484727755644	0.23915816372444504	2.2490113970908734	4.181333325305956	0.9665382048439352	0.9293507124841389	0.5187162871822346
1293	1294PHE	1293	0.08730769230769231	0.23824259630904202	59.61615353858457	0.0	1.1857813547954392	0.0	1.8063339309314204	0.5536074935404434	0.953106071655152	1.9678251809880478	0.9696113351928499	11	0.0659620596205962	90.32387045181927	1.795484727755644	0.23915816372444504	2.2490113970908734	4.181333325305956	0.9665382048439352	0.9293507124841389	0.5187162871822346
1290	1291ASN	1290	0.10956284153005463	0.17204912609091338	37.26509396241504	0.0	1.0879828326180256	0.0	2.573193812042882	0.38862210662868446	0.9996784377734291	2.4164727088466114	0.9982602130061882	11	0.0659620596205962	90.32387045181927	1.795484727755644	0.23915816372444504	2.2490113970908734	4.181333325305956	0.9665382048439352	0.9293507124841389	0.5187162871822346
1402	1403ALA	1402	0.05938356164383562	0.15723302052520352	16.83326669332267	0.0	1.0261282660332542	0.0	2.6284265657904236	0.3804557498448806	0.9973855979878282	3.7886793624061155	0.9955057868080001	11	0.0659620596205962	90.32387045181927	1.795484727755644	0.23915816372444504	2.2490113970908734	4.181333325305956	0.9665382048439352	0.9293507124841389	0.5187162871822346
1297	1298LEU	1297	0.09212765957446808	0.2109949698927781	21.831267493002798	0.0	1.0091575091575091	0.0	2.8931116208867285	0.34564860642794815	0.9987029196479391	2.1680152723436734	0.996087241695505	11	0.0659620596205962	90.32387045181927	1.795484727755644	0.23915816372444504	2.2490113970908734	4.181333325305956	0.9665382048439352	0.9293507124841389	0.5187162871822346
1404	1405LEU	1404	0.06645714285714287	0.12795542591233935	15.19392243102759	0.0	1.0210526315789474	0.0	3.031331198251215	0.3298880704876139	0.9993863873917507	5.925099309765571	0.9938278815408047	11	0.0659620596205962	90.32387045181927	1.795484727755644	0.23915816372444504	2.2490113970908734	4.181333325305956	0.9665382048439352	0.9293507124841389	0.5187162871822346
1405	1406THR	1405	0.03811369509043927	0.08897526000269881	31.94722111155538	0.0	1.0963704630788487	0.0	4.536601784233112	0.22042930977003186	0.9965114257326756	4.398122866553591	0.9913215620937181	11	0.0659620596205962	90.32387045181927	1.795484727755644	0.23915816372444504	2.2490113970908734	4.181333325305956	0.9665382048439352	0.9293507124841389	0.5187162871822346
1278	1279TYR	1278	0.06283828382838283	0.09266425209786532	42.06317473010796	0.0	1.0979087452471483	0.0	6.440593412442993	0.1552651962268005	0.9998484111708641	7.776052219845054	0.9996189098856136	11	0.0659620596205962	90.32387045181927	1.795484727755644	0.23915816372444504	2.2490113970908734	4.181333325305956	0.9665382048439352	0.9293507124841389	0.5187162871822346
1200	1201LYS	1200	0.037142857142857144	0.032461384699341456	2.4390243902439024	0.0	1.0	0.0	11.694101148262762	0.08551319911822011	0.9991607308415691	22.252033984009486	0.9979329767571954	11	0.0659620596205962	90.32387045181927	1.795484727755644	0.23915816372444504	2.2490113970908734	4.181333325305956	0.9665382048439352	0.9293507124841389	0.5187162871822346
1410	1411TYR	1410	0.04147869674185465	0.048170217426570454	36.14554178328669	0.0	1.0973451327433628	0.0	12.26937573245128	0.08150373921267236	0.9999386302821102	14.7946652772652	0.9996726786538431	11	0.0659620596205962	90.32387045181927	1.795484727755644	0.23915816372444504	2.2490113970908734	4.181333325305956	0.9665382048439352	0.9293507124841389	0.5187162871822346
1310	1311ASN	1310	0.02090909090909091	0.014431370787625039	0.5997600959616154	0.0	1.0	0.0	18.78363694441307	0.053237826250546	0.9993944023980118	70.43080333538703	0.9972317883961613	11	0.0659620596205962	90.32387045181927	1.795484727755644	0.23915816372444504	2.2490113970908734	4.181333325305956	0.9665382048439352	0.9293507124841389	0.5187162871822346
1204	1205TYR	1204	0.0175	0.01299038105676658	0.23990403838464613	0.0	1.0	0.0	23.602226840635286	0.04236888352747836	0.9922885257138508	17.381225118608377	0.5939156803846924	11	0.0659620596205962	90.32387045181927	1.795484727755644	0.23915816372444504	2.2490113970908734	4.181333325305956	0.9665382048439352	0.9293507124841389	0.5187162871822346
1296	1297LEU	1296	0.02414634146341463	0.027417335601643694	18.0327868852459	0.0	1.0598669623059866	0.0	26.124627622402738	0.038278057565209724	0.9998824534666257	31.611098229897607	0.9977052414891917	11	0.0659620596205962	90.32387045181927	1.795484727755644	0.23915816372444504	2.2490113970908734	4.181333325305956	0.9665382048439352	0.9293507124841389	0.5187162871822346
1395	1396VAL	1395	0.020625	0.020453835214941967	2.7189124350259894	0.0	1.0294117647058822	0.0	38.8333690673329	0.025751049265545493	0.9991328109761715	37.00122390488516	0.9976485628064904	11	0.0659620596205962	90.32387045181927	1.795484727755644	0.23915816372444504	2.2490113970908734	4.181333325305956	0.9665382048439352	0.9293507124841389	0.5187162871822346
1304	1305TYR	1304	0.019241706161137444	0.01766978208650997	12.155137944822071	0.0	1.0394736842105263	0.0	39.96991665034806	0.02501881624492434	0.9999575623717383	46.21517890647806	0.9995136868599624	11	0.0659620596205962	90.32387045181927	1.795484727755644	0.23915816372444504	2.2490113970908734	4.181333325305956	0.9665382048439352	0.9293507124841389	0.5187162871822346
1306	1307LEU	1306	0.022083333333333333	0.020202963204001098	1.4794082367053178	0.0	1.0	0.0	41.40572100389407	0.024151251946704498	0.9984408750698097	39.196970523308664	0.9975709158710184	11	0.0659620596205962	90.32387045181927	1.795484727755644	0.23915816372444504	2.2490113970908734	4.181333325305956	0.9665382048439352	0.9293507124841389	0.5187162871822346
1291	1292SER	1291	0.021333333333333333	0.01783878421367954	0.7596961215513794	0.0	1.0	0.0	41.913479166136334	0.02385867314990024	0.9987157227709803	48.64279757598736	0.9977962361837902	11	0.0659620596205962	90.32387045181927	1.795484727755644	0.23915816372444504	2.2490113970908734	4.181333325305956	0.9665382048439352	0.9293507124841389	0.5187162871822346
1300	1301SER	1300	0.021127450980392155	0.01879203605234662	11.075569772091164	0.0	1.0216606498194947	0.0	45.81128819076688	0.021828681084797498	0.9995686109551966	45.183924728231304	0.9988198162580322	11	0.0659620596205962	90.32387045181927	1.795484727755644	0.23915816372444504	2.2490113970908734	4.181333325305956	0.9665382048439352	0.9293507124841389	0.5187162871822346
1398	1399LEU	1398	0.015654008438818562	0.011981636563262383	10.875649740103958	0.0	1.0330882352941178	0.0	47.6092721741149	0.021004311856371933	0.9999740321753681	54.42151494380946	0.998273459932037	11	0.0659620596205962	90.32387045181927	1.795484727755644	0.23915816372444504	2.2490113970908734	4.181333325305956	0.9665382048439352	0.9293507124841389	0.5187162871822346
1301	1302ILE	1301	0.01379310344827586	0.008057463065895118	4.998000799680128	0.0	1.0	0.0	77.34758507408694	0.012928651864724099	0.9999061451016027	68.84910021054068	0.9997826853444016	11	0.0659620596205962	90.32387045181927	1.795484727755644	0.23915816372444504	2.2490113970908734	4.181333325305956	0.9665382048439352	0.9293507124841389	0.5187162871822346
1305	1306PHE	1305	0.014857142857142857	0.010521115794012553	1.799280287884846	0.0	1.0222222222222221	0.0	78.42677488526685	0.012750747451529576	0.9993950229328132	79.58980842871372	0.9990514740566535	11	0.0659620596205962	90.32387045181927	1.795484727755644	0.23915816372444504	2.2490113970908734	4.181333325305956	0.9665382048439352	0.9293507124841389	0.5187162871822346
1399	1400GLY	1399	0.010370370370370372	0.0018885257457751054	1.0795681727309077	0.0	1.0	0.0	264.3452072170211	0.0037829322140084196	0.9999999675752421	206.74118564583802	0.8999540799932901	11	0.0659620596205962	90.32387045181927	1.795484727755644	0.23915816372444504	2.2490113970908734	4.181333325305956	0.9665382048439352	0.9293507124841389	0.5187162871822346
1196	1197ARG	1196	0.01	0.0	0.07996801279488205	0.0	1.0	0.0	0.0	0.0	-0.00040016006402532334	0.0	-0.00040016006402532334	11	0.0659620596205962	90.32387045181927	1.795484727755644	0.23915816372444504	2.2490113970908734	4.181333325305956	0.9665382048439352	0.9293507124841389	0.5187162871822346
52	53ILE	52	0.2729333333333333	0.855022453246437	49.300279888044784	0.0	1.0178426601784265	0.0	0.5075039698273993	1.9704279364358415	0.9789581756332724	0.6124372682162397	0.9869584000168145	4	0.09639671361502347	99.68012794882047	2.862414761331729	0.44480396256991134	0.4964584063619378	2.2481814105755107	0.9968116210760024	0.9778272414466768	0.6623445644201262
50	51HIS	50	0.16556886227544912	0.42621661692081436	66.17353058776489	0.0	1.2060422960725075	0.0	1.180608875696615	0.8470205675947953	0.9815078926224443	1.2219947197334082	0.9851212925800649	4	0.09639671361502347	99.68012794882047	2.862414761331729	0.44480396256991134	0.4964584063619378	2.2481814105755107	0.9968116210760024	0.9778272414466768	0.6623445644201262
55	56VAL	55	0.10430000000000002	0.20819824687062086	49.26029588164734	0.0	1.0568181818181819	0.0	1.29023485249017	0.7750526953058097	0.9981133810986866	2.1702797626144177	0.997536245206369	4	0.09639671361502347	99.68012794882047	2.862414761331729	0.44480396256991134	0.4964584063619378	2.2481814105755107	0.9968116210760024	0.9778272414466768	0.6623445644201262
384	385TYR	384	0.21448598130841123	0.41859183975341563	52.73890443822471	0.0	1.0386656557998484	0.0	1.70190762477843	0.5875759562039622	0.9983641114015412	1.6021808986780477	0.9976328545259138	4	0.09639671361502347	99.68012794882047	2.862414761331729	0.44480396256991134	0.4964584063619378	2.2481814105755107	0.9968116210760024	0.9778272414466768	0.6623445644201262
51	52LYS	51	0.32211538461538464	0.36001782294802664	24.99000399840064	0.0	1.0	0.0	1.8325466746865615	0.5456886931248504	0.9986761597889473	2.097024507269264	0.9979373909494911	4	0.09639671361502347	99.68012794882047	2.862414761331729	0.44480396256991134	0.4964584063619378	2.2481814105755107	0.9968116210760024	0.9778272414466768	0.6623445644201262
389	390ILE	389	0.16655462184873954	0.19622674662768044	50.7796881247501	0.0	1.0070866141732284	0.0	2.0703277704046448	0.4830153052550468	0.9995625835623843	3.9437933679273627	0.9992319478737706	4	0.09639671361502347	99.68012794882047	2.862414761331729	0.44480396256991134	0.4964584063619378	2.2481814105755107	0.9968116210760024	0.9778272414466768	0.6623445644201262
388	389GLU	388	0.16357142857142856	0.20769507673018922	3.1587365053978407	0.0	1.0	0.0	2.8327648988127305	0.35301199913170356	0.9955060263331591	2.8897572791052255	0.9917632812111454	4	0.09639671361502347	99.68012794882047	2.862414761331729	0.44480396256991134	0.4964584063619378	2.2481814105755107	0.9968116210760024	0.9778272414466768	0.6623445644201262
1046	1047ASN	1046	0.11180232558139536	0.15593568439908256	33.866453418632545	0.0	1.036599763872491	0.0	3.603801059400981	0.2774847955026182	0.9998739408185517	4.689017719830093	0.9994369032533751	4	0.09639671361502347	99.68012794882047	2.862414761331729	0.44480396256991134	0.4964584063619378	2.2481814105755107	0.9968116210760024	0.9778272414466768	0.6623445644201262
385	386SER	385	0.12	0.15658863304850706	0.7996801279488205	0.0	1.0	0.0	3.6837266460737763	0.2714642252475029	0.9919004223162784	13.621765683898072	0.9882697014261936	4	0.09639671361502347	99.68012794882047	2.862414761331729	0.44480396256991134	0.4964584063619378	2.2481814105755107	0.9968116210760024	0.9778272414466768	0.6623445644201262
392	393ASN	392	0.17295918367346938	0.23774110933686113	24.91003598560576	0.0	1.0016051364365972	0.0	3.7344200943390833	0.2677791932182123	0.9984882991332146	3.393018814918438	0.998931445003486	4	0.09639671361502347	99.68012794882047	2.862414761331729	0.44480396256991134	0.4964584063619378	2.2481814105755107	0.9968116210760024	0.9778272414466768	0.6623445644201262
1047	1048LYS	1047	0.1295897435897436	0.18717559532308062	51.29948020791684	0.0	1.2073265783320344	0.0	4.21467831058405	0.23726603225891865	0.9998098851550611	3.833975357487206	0.9991032336778943	4	0.09639671361502347	99.68012794882047	2.862414761331729	0.44480396256991134	0.4964584063619378	2.2481814105755107	0.9968116210760024	0.9778272414466768	0.6623445644201262
1044	1045ASP	1044	0.07382252559726962	0.1323626053227244	36.70531787285086	0.0	1.1241830065359477	0.0	4.280773306299786	0.23360265270958244	0.9997146536370256	4.120176137725904	0.9979689242116363	4	0.09639671361502347	99.68012794882047	2.862414761331729	0.44480396256991134	0.4964584063619378	2.2481814105755107	0.9968116210760024	0.9778272414466768	0.6623445644201262
393	394LYS	393	0.09842857142857142	0.16666735374008038	40.66373450619752	0.0	1.1396263520157326	0.0	4.5841661304716625	0.21814218148702008	0.987513024974498	3.5768959128319864	0.9983919399583477	4	0.09639671361502347	99.68012794882047	2.862414761331729	0.44480396256991134	0.4964584063619378	2.2481814105755107	0.9968116210760024	0.9778272414466768	0.6623445644201262
396	397ILE	396	0.06095406360424029	0.09716916149882454	34.02638944422231	0.0	1.0881316098707403	0.0	4.603802426862663	0.2172117539547557	0.9993024024909344	6.773286168980311	0.9949060717717083	4	0.09639671361502347	99.68012794882047	2.862414761331729	0.44480396256991134	0.4964584063619378	2.2481814105755107	0.9968116210760024	0.9778272414466768	0.6623445644201262
395	396THR	395	0.08	0.1041633332799983	0.39984006397441024	0.0	1.0	0.0	5.299807460143789	0.18868609992349966	0.9839564611418667	18.49123725589372	0.9836532978604732	4	0.09639671361502347	99.68012794882047	2.862414761331729	0.44480396256991134	0.4964584063619378	2.2481814105755107	0.9968116210760024	0.9778272414466768	0.6623445644201262
399	400TRP	399	0.06819314641744549	0.10715743832577572	52.89884046381447	0.0	1.0959939531368104	0.0	6.784217819025327	0.14740092766415153	0.9997447173956989	6.558246120111216	0.9981488079111147	4	0.09639671361502347	99.68012794882047	2.862414761331729	0.44480396256991134	0.4964584063619378	2.2481814105755107	0.9968116210760024	0.9778272414466768	0.6623445644201262
47	48GLU	47	0.05612244897959184	0.08724388351242184	5.037984806077569	0.0	1.0	0.0	7.984839736473756	0.1252373288636119	0.9980396873034246	7.12865024544727	0.9962381813979014	4	0.09639671361502347	99.68012794882047	2.862414761331729	0.44480396256991134	0.4964584063619378	2.2481814105755107	0.9968116210760024	0.9778272414466768	0.6623445644201262
46	47TYR	46	0.053118556701030925	0.07116349960666214	49.74010395841663	0.0	1.1704180064308682	0.0	9.776280849231217	0.10228838710977065	0.9997850644469828	9.779886578103026	0.9996886123132718	4	0.09639671361502347	99.68012794882047	2.862414761331729	0.44480396256991134	0.4964584063619378	2.2481814105755107	0.9968116210760024	0.9778272414466768	0.6623445644201262
39	40ASN	39	0.04081911262798635	0.043561709905156794	26.5093962415034	0.0	1.0723981900452488	0.0	11.474509058114531	0.0871496980773065	0.999872195120748	16.973185048803455	0.9995628595496306	4	0.09639671361502347	99.68012794882047	2.862414761331729	0.44480396256991134	0.4964584063619378	2.2481814105755107	0.9968116210760024	0.9778272414466768	0.6623445644201262
59	60ILE	59	0.04646276595744681	0.05929540810329847	37.664934026389446	0.0	1.0583864118895967	0.0	13.643720713178555	0.07329378994353745	0.9996866411387861	13.866550361420304	0.9994545418838806	4	0.09639671361502347	99.68012794882047	2.862414761331729	0.44480396256991134	0.4964584063619378	2.2481814105755107	0.9968116210760024	0.9778272414466768	0.6623445644201262
56	57TYR	56	0.026642335766423362	0.029701123679565844	8.276689324270292	0.0	1.0241545893719808	0.0	13.93434608481187	0.07176511864377891	0.9997175147918124	26.750634082404055	0.9993736202397804	4	0.09639671361502347	99.68012794882047	2.862414761331729	0.44480396256991134	0.4964584063619378	2.2481814105755107	0.9968116210760024	0.9778272414466768	0.6623445644201262
403	404VAL	403	0.025560439560439557	0.02953976972508727	28.028788484606157	0.0	1.0499286733238231	0.0	15.015980288232857	0.06659571874795556	0.9998277748157138	16.09418951241053	0.9996755145310393	4	0.09639671361502347	99.68012794882047	2.862414761331729	0.44480396256991134	0.4964584063619378	2.2481814105755107	0.9968116210760024	0.9778272414466768	0.6623445644201262
502	503LYS	502	0.028500000000000004	0.02928736929121494	2.0791683326669332	0.0	1.0	0.0	18.871872899158355	0.0529889113467163	0.9970240531807216	27.27361838615524	0.9952744624075145	4	0.09639671361502347	99.68012794882047	2.862414761331729	0.44480396256991134	0.4964584063619378	2.2481814105755107	0.9968116210760024	0.9778272414466768	0.6623445644201262
382	383LEU	382	0.03734006734006735	0.04205170191164086	25.629748100759695	0.0	1.0842433697347893	0.0	19.723495855960433	0.05070095115505603	0.9999320040932994	20.54968607639985	0.9993807962477181	4	0.09639671361502347	99.68012794882047	2.862414761331729	0.44480396256991134	0.4964584063619378	2.2481814105755107	0.9968116210760024	0.9778272414466768	0.6623445644201262
379	380LYS	379	0.027410071942446042	0.027519466739657442	17.033186725309875	0.0	1.0845070422535212	0.0	19.8801305136087	0.05030148063240642	0.9998808239226554	30.46868019107577	0.9998051302509635	4	0.09639671361502347	99.68012794882047	2.862414761331729	0.44480396256991134	0.4964584063619378	2.2481814105755107	0.9968116210760024	0.9778272414466768	0.6623445644201262
42	43PHE	42	0.03221837088388215	0.037692555551016055	47.580967612954815	0.0	1.2226890756302522	0.0	20.722652954734667	0.04825636959632247	0.9999490671988454	21.81674659218219	0.9985098550827605	4	0.09639671361502347	99.68012794882047	2.862414761331729	0.44480396256991134	0.4964584063619378	2.2481814105755107	0.9968116210760024	0.9778272414466768	0.6623445644201262
380	381PRO	380	0.025098039215686273	0.027679719270621638	5.7976809276289485	0.0	1.0551724137931036	0.0	22.779824026671715	0.0438984953891282	0.9991208197347186	26.05941946218443	0.9976198311024694	4	0.09639671361502347	99.68012794882047	2.862414761331729	0.44480396256991134	0.4964584063619378	2.2481814105755107	0.9968116210760024	0.9778272414466768	0.6623445644201262
34	35LYS	34	0.03127659574468085	0.03534733558688542	3.5185925629748103	0.0	1.0227272727272727	0.0	23.661950787912637	0.04226194234631049	0.9991820610893077	20.11250004844033	0.9977194237036846	4	0.09639671361502347	99.68012794882047	2.862414761331729	0.44480396256991134	0.4964584063619378	2.2481814105755107	0.9968116210760024	0.9778272414466768	0.6623445644201262
49	50PHE	49	0.03558922558922559	0.0417754896290124	46.781287485006	0.0	1.1735042735042736	0.0	23.87551412861184	0.041883914818053036	0.9950145066806722	20.16252245546833	0.997811840201172	4	0.09639671361502347	99.68012794882047	2.862414761331729	0.44480396256991134	0.4964584063619378	2.2481814105755107	0.9968116210760024	0.9778272414466768	0.6623445644201262
383	384LYS	383	0.027916666666666663	0.022169642657371716	1.1195521791283487	0.0	1.0	0.0	30.451792863865407	0.032838788982655145	0.9992096852050026	30.60979471446608	0.9982500557514046	4	0.09639671361502347	99.68012794882047	2.862414761331729	0.44480396256991134	0.4964584063619378	2.2481814105755107	0.9968116210760024	0.9778272414466768	0.6623445644201262
58	59PHE	58	0.0185	0.01661174283451318	25.38984406237505	0.0	1.062992125984252	0.0	33.14691965504838	0.030168715838658537	0.9999677759402258	37.012031257516504	0.999926375357776	4	0.09639671361502347	99.68012794882047	2.862414761331729	0.44480396256991134	0.4964584063619378	2.2481814105755107	0.9968116210760024	0.9778272414466768	0.6623445644201262
1045	1046THR	1045	0.035	0.005000000000000001	0.1599360255897641	0.0	1.0	0.0	33.73520569521287	0.029642623466852112	0.9819958232021153	33.44365887501849	0.9787532963751246	4	0.09639671361502347	99.68012794882047	2.862414761331729	0.44480396256991134	0.4964584063619378	2.2481814105755107	0.9968116210760024	0.9778272414466768	0.6623445644201262
447	448PHE	447	0.023725	0.021174852419792684	24.670131947221112	0.0	1.0502431118314424	0.0	42.30946716915299	0.02363537210246601	0.9999412267194911	44.60303424525085	0.9998359504010871	4	0.09639671361502347	99.68012794882047	2.862414761331729	0.44480396256991134	0.4964584063619378	2.2481814105755107	0.9968116210760024	0.9778272414466768	0.6623445644201262
386	387LYS	386	0.021428571428571432	0.019587584572574413	0.6797281087564974	0.0	1.0	0.0	42.73232767761618	0.023401486751301277	0.998704402715646	36.265980295838034	0.9973825531684272	4	0.09639671361502347	99.68012794882047	2.862414761331729	0.44480396256991134	0.4964584063619378	2.2481814105755107	0.9968116210760024	0.9778272414466768	0.6623445644201262
446	447PHE	446	0.02108352144469526	0.017883489851532226	23.270691723310676	0.0	1.0687285223367697	0.0	42.790006209582614	0.02336994285773333	0.9999630858959797	45.597308306615005	0.9996751530152922	4	0.09639671361502347	99.68012794882047	2.862414761331729	0.44480396256991134	0.4964584063619378	2.2481814105755107	0.9968116210760024	0.9778272414466768	0.6623445644201262
381	382VAL	381	0.024503816793893136	0.02079392675788383	7.876849260295882	0.0	1.0101522842639594	0.0	44.257524202685694	0.022595028032302737	0.9992282484090114	18.624203541807052	0.9990593566663417	4	0.09639671361502347	99.68012794882047	2.862414761331729	0.44480396256991134	0.4964584063619378	2.2481814105755107	0.9968116210760024	0.9778272414466768	0.6623445644201262
43	44LEU	43	0.024499999999999997	0.020979385486343864	17.313074770091962	0.0	1.048498845265589	0.0	44.67264675382186	0.022385062732251194	0.9999512360861263	37.1951477243457	0.9998117245151933	4	0.09639671361502347	99.68012794882047	2.862414761331729	0.44480396256991134	0.4964584063619378	2.2481814105755107	0.9968116210760024	0.9778272414466768	0.6623445644201262
62	63VAL	62	0.017796610169491526	0.014054108104420716	13.754498200719713	0.0	1.0261627906976745	0.0	48.24543998996019	0.020727347500781392	0.9999363324831039	51.127522070969746	0.9988610638722026	4	0.09639671361502347	99.68012794882047	2.862414761331729	0.44480396256991134	0.4964584063619378	2.2481814105755107	0.9968116210760024	0.9778272414466768	0.6623445644201262
1156	1157ASN	1156	0.02	0.0	0.03998400639744103	0.0	1.0	0.0	59.89496507342637	0.016695894200356925	0.9763873287863242	59.89496507342638	0.9763873287863241	4	0.09639671361502347	99.68012794882047	2.862414761331729	0.44480396256991134	0.4964584063619378	2.2481814105755107	0.9968116210760024	0.9778272414466768	0.6623445644201262
406	407CYS	406	0.012	0.006782329983125268	0.7996801279488205	0.0	1.0	0.0	79.32656490378224	0.012606117524601404	0.999602414787421	115.43789474613064	0.9994821834256717	4	0.09639671361502347	99.68012794882047	2.862414761331729	0.44480396256991134	0.4964584063619378	2.2481814105755107	0.9968116210760024	0.9778272414466768	0.6623445644201262
63	64LEU	63	0.014457831325301207	0.009281801347836825	7.117153138744502	0.0	1.0280898876404494	0.0	81.55433555806472	0.012261763806389228	0.9999569866720559	86.31143712840338	0.9998729458904361	4	0.09639671361502347	99.68012794882047	2.862414761331729	0.44480396256991134	0.4964584063619378	2.2481814105755107	0.9968116210760024	0.9778272414466768	0.6623445644201262
60	61ILE	60	0.014347826086956525	0.006805424279347185	1.839264294282287	0.0	1.0	0.0	86.04987099060524	0.011621167916790695	0.9998227945593734	83.83655716122476	0.9996820659308916	4	0.09639671361502347	99.68012794882047	2.862414761331729	0.44480396256991134	0.4964584063619378	2.2481814105755107	0.9968116210760024	0.9778272414466768	0.6623445644201262
450	451ILE	450	0.015911330049261083	0.010388133610319315	10.15593762495002	0.0	1.0	0.0	87.72806155439211	0.011398861234155868	0.9999302352574837	77.89028110541292	0.9998080397014999	4	0.09639671361502347	99.68012794882047	2.862414761331729	0.44480396256991134	0.4964584063619378	2.2481814105755107	0.9968116210760024	0.9778272414466768	0.6623445644201262
451	452VAL	451	0.011111111111111112	0.0031426968052735444	0.3598560575769692	0.0	1.0	0.0	166.21877841595935	0.006016167424221582	0.9999868071054127	56.559318163024685	0.3996915133940818	4	0.09639671361502347	99.68012794882047	2.862414761331729	0.44480396256991134	0.4964584063619378	2.2481814105755107	0.9968116210760024	0.9778272414466768	0.6623445644201262
402	403GLN	402	0.010869565217391308	0.0028177133471338524	0.9196321471411435	0.0	1.0	0.0	186.6212961971279	0.0053584452598791354	0.9999963004509823	208.5863376301208	0.9999552624629642	4	0.09639671361502347	99.68012794882047	2.862414761331729	0.44480396256991134	0.4964584063619378	2.2481814105755107	0.9968116210760024	0.9778272414466768	0.6623445644201262
1138	1139ASN	1138	0.01	0.0	0.03998400639744103	0.0	1.0	0.0	0.0	0.0	-0.00040016006402532334	0.0	-0.00040016006402532334	4	0.09639671361502347	99.68012794882047	2.862414761331729	0.44480396256991134	0.4964584063619378	2.2481814105755107	0.9968116210760024	0.9778272414466768	0.6623445644201262
138	139LYS	138	0.1453846153846154	0.3919672353774834	36.10555777688924	0.0	1.0420819490586932	0.0	0.6847195442203486	1.4604519594057204	0.9950726517390566	1.095552867989224	0.9886197084007236	6	0.08358762886597938	96.56137544982008	3.012008281573499	0.6364234108795802	0.8513371529264118	1.5712809788344089	0.9759265746594115	0.981744879114997	0.6700421977580812
1243	1244PHE	1243	0.10527027027027026	0.18032420482528932	39.58416633346661	0.0	1.0292929292929294	0.0	0.9461628439315416	1.0569005181441617	0.9967384567479761	2.583242076451898	0.9959498134094389	6	0.08358762886597938	96.56137544982008	3.012008281573499	0.6364234108795802	0.8513371529264118	1.5712809788344089	0.9759265746594115	0.981744879114997	0.6700421977580812
76	77PRO	76	0.08702479338842976	0.19932383480363075	24.030387844862055	0.0	1.0099833610648918	0.0	2.020075144941852	0.4950310895631484	0.9982940578214584	3.82381760279398	0.9945622728670142	6	0.08358762886597938	96.56137544982008	3.012008281573499	0.6364234108795802	0.8513371529264118	1.5712809788344089	0.9759265746594115	0.981744879114997	0.6700421977580812
1237	1238HIS	1237	0.13515151515151516	0.23564381457230987	8.316673330667733	0.0	1.0	0.0	2.0490199670921814	0.4880381919455507	0.9931865518254673	2.8207009705157566	0.9914350872719867	6	0.08358762886597938	96.56137544982008	3.012008281573499	0.6364234108795802	0.8513371529264118	1.5712809788344089	0.9759265746594115	0.981744879114997	0.6700421977580812
1361	1362SER	1361	0.07800000000000001	0.17155806659194417	41.503398640543786	0.0	1.0597302504816957	0.0	2.3595183773123702	0.4238153046890267	0.9989608165921211	2.7253356147770713	0.9951096134732739	6	0.08358762886597938	96.56137544982008	3.012008281573499	0.6364234108795802	0.8513371529264118	1.5712809788344089	0.9759265746594115	0.981744879114997	0.6700421977580812
147	148LYS	147	0.08732307692307692	0.16856654542549773	59.2562974810076	0.0	1.263157894736842	0.0	2.8059578260037035	0.35638454389181545	0.9994542441016481	3.301988392300193	0.9990448920834527	6	0.08358762886597938	96.56137544982008	3.012008281573499	0.6364234108795802	0.8513371529264118	1.5712809788344089	0.9759265746594115	0.981744879114997	0.6700421977580812
139	140LYS	139	0.05156351791530944	0.14947518952887356	43.702518992403036	0.0	1.111619396157365	0.0	2.907333315877617	0.343957809907371	0.9993726293086932	2.595371471450383	0.9947922554536561	6	0.08358762886597938	96.56137544982008	3.012008281573499	0.6364234108795802	0.8513371529264118	1.5712809788344089	0.9759265746594115	0.981744879114997	0.6700421977580812
141	142PHE	141	0.07739856801909308	0.1827936512787851	65.21391443422631	0.0	1.3476394849785407	0.0	3.055518788702761	0.32727666532351973	0.9781441057261808	2.8328585611209043	0.9939191667808733	6	0.08358762886597938	96.56137544982008	3.012008281573499	0.6364234108795802	0.8513371529264118	1.5712809788344089	0.9759265746594115	0.981744879114997	0.6700421977580812
80	81PHE	80	0.035339366515837106	0.07466060606060103	20.471811275489806	0.0	1.0703125	0.0	3.2344896359842705	0.3091677861245319	0.9955614951160296	8.934479029468447	0.9893445790764354	6	0.08358762886597938	96.56137544982008	3.012008281573499	0.6364234108795802	0.8513371529264118	1.5712809788344089	0.9759265746594115	0.981744879114997	0.6700421977580812
140	141LEU	140	0.038624031007751934	0.09339134820011272	39.1843262694922	0.0	1.1479591836734695	0.0	3.387198784168018	0.2952292037520985	0.9973943325667838	4.615892790277824	0.9817106351581222	6	0.08358762886597938	96.56137544982008	3.012008281573499	0.6364234108795802	0.8513371529264118	1.5712809788344089	0.9759265746594115	0.981744879114997	0.6700421977580812
1242	1243LEU	1242	0.08102739726027398	0.15668102774385156	28.9484206317473	0.0	1.0538674033149171	0.0	3.786419744177637	0.26410172869442067	0.9980565770595435	3.0063464256933754	0.9969070568304497	6	0.08358762886597938	96.56137544982008	3.012008281573499	0.6364234108795802	0.8513371529264118	1.5712809788344089	0.9759265746594115	0.981744879114997	0.6700421977580812
1244	1245THR	1244	0.06909090909090909	0.11212448807662972	1.0795681727309077	0.0	1.0	0.0	4.1258636076705475	0.24237349924531257	0.9773903055347655	11.013938197073672	0.9834650214143086	6	0.08358762886597938	96.56137544982008	3.012008281573499	0.6364234108795802	0.8513371529264118	1.5712809788344089	0.9759265746594115	0.981744879114997	0.6700421977580812
1238	1239SER	1238	0.10081081081081084	0.17729770929418182	22.191123550579768	0.0	1.0342342342342343	0.0	4.2282284189775465	0.2365056711486311	0.9970405622497318	3.130477161545909	0.9979051201203797	6	0.08358762886597938	96.56137544982008	3.012008281573499	0.6364234108795802	0.8513371529264118	1.5712809788344089	0.9759265746594115	0.981744879114997	0.6700421977580812
1358	1359SER	1358	0.12073529411764707	0.17554382875267588	37.10515793682527	0.0	1.0290948275862069	0.0	4.257688508167978	0.2348692249518943	0.9986546892897001	3.8553256163013656	0.9972499283242513	6	0.08358762886597938	96.56137544982008	3.012008281573499	0.6364234108795802	0.8513371529264118	1.5712809788344089	0.9759265746594115	0.981744879114997	0.6700421977580812
1378	1379SER	1378	0.043000000000000003	0.06388270501473775	0.8396641343462615	0.0	1.0	0.0	4.495793011407104	0.22243016915207528	0.9827648072129717	15.057305580468835	0.9886570077624516	6	0.08358762886597938	96.56137544982008	3.012008281573499	0.6364234108795802	0.8513371529264118	1.5712809788344089	0.9759265746594115	0.981744879114997	0.6700421977580812
144	145LYS	144	0.08846368715083798	0.13689957812730053	57.81687325069972	0.0	1.3035961272475796	0.0	4.7294354556251275	0.21144172690011306	0.9994533572065113	5.287823406797706	0.9982771584666752	6	0.08358762886597938	96.56137544982008	3.012008281573499	0.6364234108795802	0.8513371529264118	1.5712809788344089	0.9759265746594115	0.981744879114997	0.6700421977580812
142	143PRO	142	0.09844444444444443	0.13571957290360076	14.914034386245502	0.0	1.0053619302949062	0.0	5.041390642971911	0.1983579672394714	0.9996868217150524	5.156316189639609	0.9990035082796561	6	0.08358762886597938	96.56137544982008	3.012008281573499	0.6364234108795802	0.8513371529264118	1.5712809788344089	0.9759265746594115	0.981744879114997	0.6700421977580812
1241	1242VAL	1241	0.12961538461538463	0.16402346851853872	6.2375049980008	0.0	1.0	0.0	5.381386099090526	0.185825729948833	0.9985204530636907	4.118853227835753	0.9958007440311338	6	0.08358762886597938	96.56137544982008	3.012008281573499	0.6364234108795802	0.8513371529264118	1.5712809788344089	0.9759265746594115	0.981744879114997	0.6700421977580812
1369	1370PHE	1369	0.06385964912280702	0.11142229431335689	33.4266293482607	0.0	1.0861244019138756	0.0	5.872753615392668	0.17027787397362784	0.9994622042277796	5.056459025905514	0.9970251682845154	6	0.08358762886597938	96.56137544982008	3.012008281573499	0.6364234108795802	0.8513371529264118	1.5712809788344089	0.9759265746594115	0.981744879114997	0.6700421977580812
75	76ILE	75	0.058823529411764705	0.11361522714197972	15.63374650139944	0.0	1.0051150895140666	0.0	6.269637698840351	0.15949884954037497	0.9585878889053184	5.387102925438906	0.9826008881546671	6	0.08358762886597938	96.56137544982008	3.012008281573499	0.6364234108795802	0.8513371529264118	1.5712809788344089	0.9759265746594115	0.981744879114997	0.6700421977580812
1353	1354ILE	1353	0.05588424437299034	0.08101708431631646	37.704918032786885	0.0	1.090137857900318	0.0	6.363693605777531	0.15714144362514726	0.9989350313902984	8.869410660542618	0.9984765493392093	6	0.08358762886597938	96.56137544982008	3.012008281573499	0.6364234108795802	0.8513371529264118	1.5712809788344089	0.9759265746594115	0.981744879114997	0.6700421977580812
1234	1235ILE	1234	0.0763803680981595	0.11219408077892386	29.388244702119152	0.0	1.0136054421768708	0.0	6.6160964199793515	0.1511465275778313	0.9997526984917672	6.140263538938347	0.9990959366003228	6	0.08358762886597938	96.56137544982008	3.012008281573499	0.6364234108795802	0.8513371529264118	1.5712809788344089	0.9759265746594115	0.981744879114997	0.6700421977580812
1379	1380PHE	1379	0.030000000000000002	0.028284271247461905	1.0395841663334666	0.0	1.0	0.0	7.015490828647316	0.14254170156086055	0.9956883320878215	22.584170127382833	0.9956744879125937	6	0.08358762886597938	96.56137544982008	3.012008281573499	0.6364234108795802	0.8513371529264118	1.5712809788344089	0.9759265746594115	0.981744879114997	0.6700421977580812
1365	1366THR	1365	0.04623287671232876	0.06938714510212361	30.707716913234705	0.0	1.05078125	0.0	7.307828043583026	0.136839563552415	0.9996155654848669	8.367013624531062	0.9993995612662134	6	0.08358762886597938	96.56137544982008	3.012008281573499	0.6364234108795802	0.8513371529264118	1.5712809788344089	0.9759265746594115	0.981744879114997	0.6700421977580812
81	82PRO	81	0.07720930232558139	0.0855984563378349	5.597760895641743	0.0	1.0	0.0	7.960510080506807	0.12562009090959345	0.9995581407175764	9.880063168630503	0.9983581381032168	6	0.08358762886597938	96.56137544982008	3.012008281573499	0.6364234108795802	0.8513371529264118	1.5712809788344089	0.9759265746594115	0.981744879114997	0.6700421977580812
1246	1247LEU	1246	0.06972350230414746	0.08032719409537575	35.225909636145545	0.0	1.029511918274688	0.0	8.674092348236986	0.11528583739407047	0.9997835373371884	7.96874136920987	0.9991160766558502	6	0.08358762886597938	96.56137544982008	3.012008281573499	0.6364234108795802	0.8513371529264118	1.5712809788344089	0.9759265746594115	0.981744879114997	0.6700421977580812
1239	1240TYR	1239	0.051428571428571435	0.061220578106331774	3.438624550179928	0.0	1.0	0.0	8.883113425446497	0.11257314323325061	0.9973854874012468	8.272695376981844	0.996064308020793	6	0.08358762886597938	96.56137544982008	3.012008281573499	0.6364234108795802	0.8513371529264118	1.5712809788344089	0.9759265746594115	0.981744879114997	0.6700421977580812
1354	1355GLY	1354	0.07154411764705883	0.08655904714048389	14.434226309476209	0.0	1.0	0.0	8.946926984548808	0.11177022029206041	0.9997839208516665	9.734080560925928	0.9995540291095256	6	0.08358762886597938	96.56137544982008	3.012008281573499	0.6364234108795802	0.8513371529264118	1.5712809788344089	0.9759265746594115	0.981744879114997	0.6700421977580812
1350	1351SER	1350	0.04077205882352941	0.05200176282529003	22.790883646541385	0.0	1.0456140350877192	0.0	9.174970561522034	0.10899217532029991	0.9997126762177116	10.069709820739732	0.9992663452995292	6	0.08358762886597938	96.56137544982008	3.012008281573499	0.6364234108795802	0.8513371529264118	1.5712809788344089	0.9759265746594115	0.981744879114997	0.6700421977580812
1370	1371SER	1370	0.04	0.05606119105813881	1.1995201919232308	0.0	1.0	0.0	9.553486607040107	0.10467382654444557	0.9863468576794098	35.48225139644613	0.9902479973037839	6	0.08358762886597938	96.56137544982008	3.012008281573499	0.6364234108795802	0.8513371529264118	1.5712809788344089	0.9759265746594115	0.981744879114997	0.6700421977580812
73	74ASN	73	0.03740259740259741	0.05748862332179574	5.517792882846861	0.0	1.0072463768115942	0.0	9.860951648415325	0.10141009059310234	0.998520687915708	10.479025672518805	0.9965823626009097	6	0.08358762886597938	96.56137544982008	3.012008281573499	0.6364234108795802	0.8513371529264118	1.5712809788344089	0.9759265746594115	0.981744879114997	0.6700421977580812
1362	1363PHE	1362	0.06051282051282052	0.0724851432328074	28.148740503798482	0.0	1.0411931818181819	0.0	12.424097424768613	0.08048874423717939	0.9999369338792129	11.153468406469688	0.9996316361815751	6	0.08358762886597938	96.56137544982008	3.012008281573499	0.6364234108795802	0.8513371529264118	1.5712809788344089	0.9759265746594115	0.981744879114997	0.6700421977580812
1373	1374GLY	1373	0.03111111111111111	0.0459091964750817	2.838864454218313	0.0	1.0	0.0	13.57980349985805	0.07363876804332647	0.9991179543871311	17.169853826786838	0.9941367379927419	6	0.08358762886597938	96.56137544982008	3.012008281573499	0.6364234108795802	0.8513371529264118	1.5712809788344089	0.9759265746594115	0.981744879114997	0.6700421977580812
148	149ILE	148	0.029144385026737968	0.02523293637486021	12.554978008796482	0.0	1.0286624203821657	0.0	16.00452286095359	0.062482337567195526	0.9994189155064872	19.42074439451286	0.9993065903393175	6	0.08358762886597938	96.56137544982008	3.012008281573499	0.6364234108795802	0.8513371529264118	1.5712809788344089	0.9759265746594115	0.981744879114997	0.6700421977580812
1376	1377ASN	1376	0.030869565217391304	0.028116689068216943	1.799280287884846	0.0	1.0	0.0	16.157450502529425	0.061890952402636264	0.9979916656079982	23.847896851720623	0.9970457927662719	6	0.08358762886597938	96.56137544982008	3.012008281573499	0.6364234108795802	0.8513371529264118	1.5712809788344089	0.9759265746594115	0.981744879114997	0.6700421977580812
1372	1373THR	1372	0.02469924812030075	0.029661368248143413	16.153538584566174	0.0	1.056930693069307	0.0	17.257664048263376	0.057945269835092725	0.9988800867241638	21.381312453244764	0.9974744555117866	6	0.08358762886597938	96.56137544982008	3.012008281573499	0.6364234108795802	0.8513371529264118	1.5712809788344089	0.9759265746594115	0.981744879114997	0.6700421977580812
151	152ILE	151	0.02458100558659218	0.02622885691946267	21.55137944822071	0.0	1.0556586270871986	0.0	18.658552788180426	0.053594724700913934	0.9998304623780488	20.525387669038075	0.9997458494917899	6	0.08358762886597938	96.56137544982008	3.012008281573499	0.6364234108795802	0.8513371529264118	1.5712809788344089	0.9759265746594115	0.981744879114997	0.6700421977580812
1377	1378LYS	1377	0.0321875	0.03407109983182228	2.5989604158336665	0.0	1.0	0.0	22.478147253802245	0.04448765232778903	0.9982514700063502	21.43705534790499	0.9980970975390757	6	0.08358762886597938	96.56137544982008	3.012008281573499	0.6364234108795802	0.8513371529264118	1.5712809788344089	0.9759265746594115	0.981744879114997	0.6700421977580812
1232	1233PHE	1232	0.030000000000000006	0.03768288736283355	0.7197121151539384	0.0	1.0	0.0	22.908085646245535	0.04365270915441564	0.9807368771404821	15.21190270149539	0.9845094127630055	6	0.08358762886597938	96.56137544982008	3.012008281573499	0.6364234108795802	0.8513371529264118	1.5712809788344089	0.9759265746594115	0.981744879114997	0.6700421977580812
1357	1358PHE	1357	0.033839150227617604	0.04243690219093716	51.779288284686125	0.0	1.2138996138996139	0.0	23.007209519510205	0.04346463655890107	0.9895048231626656	15.78482421815718	0.9989631591678736	6	0.08358762886597938	96.56137544982008	3.012008281573499	0.6364234108795802	0.8513371529264118	1.5712809788344089	0.9759265746594115	0.981744879114997	0.6700421977580812
1247	1248PRO	1247	0.04	0.03866830866792722	1.879248300679728	0.0	1.0	0.0	24.198184356505067	0.041325414554550056	0.9992846414885983	20.868315238402097	0.9979488119976206	6	0.08358762886597938	96.56137544982008	3.012008281573499	0.6364234108795802	0.8513371529264118	1.5712809788344089	0.9759265746594115	0.981744879114997	0.6700421977580812
1371	1372PHE	1371	0.01874285714285714	0.01890176538564262	10.075969612155138	0.0	1.0119047619047619	0.0	27.13320817170706	0.036855206862074726	0.999812181820132	40.43035115957854	0.9985866557281199	6	0.08358762886597938	96.56137544982008	3.012008281573499	0.6364234108795802	0.8513371529264118	1.5712809788344089	0.9759265746594115	0.981744879114997	0.6700421977580812
1368	1369ALA	1368	0.024691943127962086	0.02612900698795996	14.0343862455018	0.0	1.0142450142450143	0.0	29.24666791826547	0.03419192924112454	0.99992997974738	30.20392440123802	0.9978746256930048	6	0.08358762886597938	96.56137544982008	3.012008281573499	0.6364234108795802	0.8513371529264118	1.5712809788344089	0.9759265746594115	0.981744879114997	0.6700421977580812
1374	1375ILE	1374	0.021521739130434786	0.02196512960841697	5.47780887644942	0.0	1.0145985401459854	0.0	36.38685871907144	0.02748244930183737	0.9997910357426592	32.5725020871217	0.9994119701203452	6	0.08358762886597938	96.56137544982008	3.012008281573499	0.6364234108795802	0.8513371529264118	1.5712809788344089	0.9759265746594115	0.981744879114997	0.6700421977580812
1364	1365VAL	1364	0.026751269035532998	0.025680664098535946	25.30987604958017	0.0	1.0679304897314377	0.0	40.115565275801345	0.02492797977854306	0.9972467034322678	29.63189516218593	0.999855349852751	6	0.08358762886597938	96.56137544982008	3.012008281573499	0.6364234108795802	0.8513371529264118	1.5712809788344089	0.9759265746594115	0.981744879114997	0.6700421977580812
145	146THR	145	0.0221875	0.01430349061418226	1.5593762495002	0.0	1.0	0.0	42.103623799882925	0.02375092473638292	0.9984873275063149	42.27281406468377	0.99757706610558	6	0.08358762886597938	96.56137544982008	3.012008281573499	0.6364234108795802	0.8513371529264118	1.5712809788344089	0.9759265746594115	0.981744879114997	0.6700421977580812
1375	1376GLY	1375	0.0204	0.015615377036754507	1.3594562175129947	0.0	1.0	0.0	47.091178764530966	0.021235399627609217	0.9995874358074855	56.43041877497269	0.9991296967841606	6	0.08358762886597938	96.56137544982008	3.012008281573499	0.6364234108795802	0.8513371529264118	1.5712809788344089	0.9759265746594115	0.981744879114997	0.6700421977580812
1235	1236LEU	1235	0.020666666666666667	0.011813363431112901	0.8796481407437026	0.0	1.0	0.0	50.27368507155435	0.01989112193738541	0.9993996804756536	43.85797912651825	0.9972577485715448	6	0.08358762886597938	96.56137544982008	3.012008281573499	0.6364234108795802	0.8513371529264118	1.5712809788344089	0.9759265746594115	0.981744879114997	0.6700421977580812
84	85ILE	84	0.018181818181818184	0.011922615498730912	0.47980807676929227	0.0	1.0	0.0	53.660555170681576	0.01863566257969631	0.9975579865054371	59.92309235176306	0.9975420575011034	6	0.08358762886597938	96.56137544982008	3.012008281573499	0.6364234108795802	0.8513371529264118	1.5712809788344089	0.9759265746594115	0.981744879114997	0.6700421977580812
152	153GLU	152	0.01375	0.010728660991319777	1.0395841663334666	0.0	1.0384615384615385	0.0	56.859368278595774	0.017587251323304652	0.999529480666946	92.34617825934062	0.8989391541909735	6	0.08358762886597938	96.56137544982008	3.012008281573499	0.6364234108795802	0.8513371529264118	1.5712809788344089	0.9759265746594115	0.981744879114997	0.6700421977580812
1253	1254ILE	1253	0.01625	0.013169567191065925	0.4398240703718513	0.0	1.0	0.0	57.234911457566376	0.017471853708403026	0.9972704148800686	81.34827656275823	0.9975885976414057	6	0.08358762886597938	96.56137544982008	3.012008281573499	0.6364234108795802	0.8513371529264118	1.5712809788344089	0.9759265746594115	0.981744879114997	0.6700421977580812
1249	1250ILE	1249	0.018333333333333337	0.010671873729054747	0.3198720511795282	0.0	1.0	0.0	58.374988434699176	0.017130624378943457	0.9991771873300915	53.22627967289783	0.8973709955156142	6	0.08358762886597938	96.56137544982008	3.012008281573499	0.6364234108795802	0.8513371529264118	1.5712809788344089	0.9759265746594115	0.981744879114997	0.6700421977580812
1254	1255LEU	1254	0.017	0.012369316876852983	2.7189124350259894	0.0	1.0	0.0	58.49558433286311	0.01709530747328897	0.9997989521737191	60.159430885394116	0.9996903053171813	6	0.08358762886597938	96.56137544982008	3.012008281573499	0.6364234108795802	0.8513371529264118	1.5712809788344089	0.9759265746594115	0.981744879114997	0.6700421977580812
1233	1234GLU	1233	0.015555555555555555	0.007856742013183862	1.1195521791283487	0.0	1.0	0.0	76.33855254723977	0.013099541013450323	0.9997287424844538	69.76676850881354	0.9988808527874026	6	0.08358762886597938	96.56137544982008	3.012008281573499	0.6364234108795802	0.8513371529264118	1.5712809788344089	0.9759265746594115	0.981744879114997	0.6700421977580812
155	156TYR	155	0.015	0.01	0.3198720511795282	0.0	1.0	0.0	79.32656313867597	0.01260611780510186	0.9985612676558585	84.98687730172735	0.9985754988300686	6	0.08358762886597938	96.56137544982008	3.012008281573499	0.6364234108795802	0.8513371529264118	1.5712809788344089	0.9759265746594115	0.981744879114997	0.6700421977580812
1250	1251ILE	1250	0.01625	0.009492321458245431	1.0795681727309077	0.0	1.0	0.0	80.70366064660102	0.012391011659049406	0.9997644587158077	59.63613628083624	0.9988803483143791	6	0.08358762886597938	96.56137544982008	3.012008281573499	0.6364234108795802	0.8513371529264118	1.5712809788344089	0.9759265746594115	0.981744879114997	0.6700421977580812
1351	1352PRO	1351	0.01	0.0	0.03998400639744103	0.0	1.0	0.0	0.0	0.0	-0.00040016006402532334	0.0	-0.00040016006402532334	6	0.08358762886597938	96.56137544982008	3.012008281573499	0.6364234108795802	0.8513371529264118	1.5712809788344089	0.9759265746594115	0.981744879114997	0.6700421977580812
105	106LYS	105	0.15369863013698631	0.329821482844991	23.47061175529788	0.0	1.018739352640545	0.0	0.45380550358339455	2.2035872022346084	0.9949019962129091	1.453763590633506	0.9945383711377935	2	0.09887519260400617	100.0	4.678928428628549	1.1073768736355236	1.273041506159102	0.9030349321970172	0.9994560040219307	0.9871579680076856	0.7415419064035237
143	144GLN	143	0.10782312925170068	0.21837219991640472	36.42542982806877	0.0	1.026344676180022	0.0	0.8569447229649199	1.1669364116510654	0.9955488167082482	2.1281812413541266	0.9962240717397248	2	0.09887519260400617	100.0	4.678928428628549	1.1073768736355236	1.273041506159102	0.9030349321970172	0.9994560040219307	0.9871579680076856	0.7415419064035237
133	134PHE	133	0.09868312757201644	0.31831461130921146	43.50259896041583	0.0	1.2095588235294117	0.0	1.170676661579766	0.8542068299632395	0.97271381213758	1.681758700599246	0.9868852800128854	2	0.09887519260400617	100.0	4.678928428628549	1.1073768736355236	1.273041506159102	0.9030349321970172	0.9994560040219307	0.9871579680076856	0.7415419064035237
135	136ARG	135	0.1336996336996337	0.33041744808630463	73.45061975209916	0.0	1.3429504627109417	0.0	1.196596784039914	0.8357033992886309	0.9990709670652114	1.3725467029392582	0.9943390545702547	2	0.09887519260400617	100.0	4.678928428628549	1.1073768736355236	1.273041506159102	0.9030349321970172	0.9994560040219307	0.9871579680076856	0.7415419064035237
134	135LEU	134	0.10338645418326693	0.332278272917692	56.61735305877649	0.0	1.1207627118644068	0.0	1.2012006064956404	0.8325004121646099	0.997938904858036	1.33096540503562	0.9899955314451887	2	0.09887519260400617	100.0	4.678928428628549	1.1073768736355236	1.273041506159102	0.9030349321970172	0.9994560040219307	0.9871579680076856	0.7415419064035237
98	99TRP	98	0.10313609467455621	0.3232255873145064	41.903238704518195	0.0	1.1259541984732824	0.0	1.2016750505430618	0.8321717252497498	0.9728540717661789	1.4520784190161942	0.9902205897928049	2	0.09887519260400617	100.0	4.678928428628549	1.1073768736355236	1.273041506159102	0.9030349321970172	0.9994560040219307	0.9871579680076856	0.7415419064035237
35	36TYR	35	0.12836065573770492	0.3443780185409847	50.61975209916034	0.0	1.1271721958925751	0.0	1.2782642000954667	0.7823108868458613	0.9734022855092785	0.9647274818484265	0.9886847434251406	2	0.09887519260400617	100.0	4.678928428628549	1.1073768736355236	1.273041506159102	0.9030349321970172	0.9994560040219307	0.9871579680076856	0.7415419064035237
97	98ASP	97	0.1108	0.27309954229181715	5.637744902039184	0.0	1.0	0.0	1.3251446437387477	0.7546346013810323	0.9861524786401564	4.0088152657185665	0.9872533547547908	2	0.09887519260400617	100.0	4.678928428628549	1.1073768736355236	1.273041506159102	0.9030349321970172	0.9994560040219307	0.9871579680076856	0.7415419064035237
40	41PHE	40	0.06699633699633699	0.18560994388403246	41.74330267892843	0.0	1.103448275862069	0.0	1.3901035469268932	0.7193708714798286	0.9970119832237944	1.9790663223521094	0.9880484853489507	2	0.09887519260400617	100.0	4.678928428628549	1.1073768736355236	1.273041506159102	0.9030349321970172	0.9994560040219307	0.9871579680076856	0.7415419064035237
101	102HIS	101	0.31418604651162785	0.4817228410811072	25.74970011995202	0.0	1.0062111801242235	0.0	1.4801533361610348	0.675605679201877	0.9980433843673044	1.5514491566378594	0.9921496779543378	2	0.09887519260400617	100.0	4.678928428628549	1.1073768736355236	1.273041506159102	0.9030349321970172	0.9994560040219307	0.9871579680076856	0.7415419064035237
132	133LYS	132	0.1348471615720524	0.30053896019775345	68.1327469012395	0.0	1.2816901408450705	0.0	1.6031475427946738	0.6237729050544893	0.9991402872794921	1.602949306469153	0.9945347877800363	2	0.09887519260400617	100.0	4.678928428628549	1.1073768736355236	1.273041506159102	0.9030349321970172	0.9994560040219307	0.9871579680076856	0.7415419064035237
95	96TYR	95	0.07418803418803419	0.1884540766396909	16.673330667732905	0.0	1.0359712230215827	0.0	1.7416784716897389	0.5741587877754621	0.9920517462211011	3.006739414121236	0.9894833421501008	2	0.09887519260400617	100.0	4.678928428628549	1.1073768736355236	1.273041506159102	0.9030349321970172	0.9994560040219307	0.9871579680076856	0.7415419064035237
131	132ILE	131	0.07162790697674419	0.15867916527895493	42.66293482606957	0.0	1.169634489222118	0.0	1.8789606712587563	0.5322091171445746	0.9981950140478676	2.852948875323027	0.9767431430750065	2	0.09887519260400617	100.0	4.678928428628549	1.1073768736355236	1.273041506159102	0.9030349321970172	0.9994560040219307	0.9871579680076856	0.7415419064035237
146	147LYS	146	0.24387596899224806	0.4104588283038729	57.696921231507396	0.0	1.2044352044352045	0.0	1.9231889037808347	0.5199697221807387	0.9843986226216426	2.223130843474972	0.9933903546939433	2	0.09887519260400617	100.0	4.678928428628549	1.1073768736355236	1.273041506159102	0.9030349321970172	0.9994560040219307	0.9871579680076856	0.7415419064035237
157	158ASP	157	0.0543661971830986	0.14128915904273537	13.634546181527389	0.0	1.029325513196481	0.0	2.109170637840943	0.4741200081486305	0.9970837992068826	3.5887988177791357	0.9786351903046911	2	0.09887519260400617	100.0	4.678928428628549	1.1073768736355236	1.273041506159102	0.9030349321970172	0.9994560040219307	0.9871579680076856	0.7415419064035237
190	191ARG	190	0.20957142857142858	0.27311659317842213	26.14954018392643	0.0	1.0061162079510704	0.0	2.2127915306630546	0.4519178540512372	0.998478866343863	2.443148063402698	0.996994057279567	2	0.09887519260400617	100.0	4.678928428628549	1.1073768736355236	1.273041506159102	0.9030349321970172	0.9994560040219307	0.9871579680076856	0.7415419064035237
108	109ASN	108	0.1163934426229508	0.13575572067027497	6.797281087564974	0.0	1.0	0.0	2.7213092787403483	0.36747017614362615	0.9974155566033407	4.557281456520807	0.9963292349419046	2	0.09887519260400617	100.0	4.678928428628549	1.1073768736355236	1.273041506159102	0.9030349321970172	0.9994560040219307	0.9871579680076856	0.7415419064035237
154	155TYR	154	0.040788912579957357	0.0867318011774879	39.06437425029988	0.0	1.1392016376663254	0.0	3.3346565902872523	0.29988095413262883	0.9991085914863606	3.948563135336453	0.9881284182894362	2	0.09887519260400617	100.0	4.678928428628549	1.1073768736355236	1.273041506159102	0.9030349321970172	0.9994560040219307	0.9871579680076856	0.7415419064035237
83	84SER	83	0.020762711864406775	0.06396710992352105	13.834466213514593	0.0	1.023121387283237	0.0	3.6450297891462	0.2743461803735318	0.8108314587516527	10.804141383239353	0.9555317928755225	2	0.09887519260400617	100.0	4.678928428628549	1.1073768736355236	1.273041506159102	0.9030349321970172	0.9994560040219307	0.9871579680076856	0.7415419064035237
94	95ALA	94	0.05943548387096774	0.14086886157078768	12.834866053578569	0.0	1.0	0.0	3.7931581331282556	0.2636325628679472	0.937509319818448	4.499347242560853	0.9872632925489105	2	0.09887519260400617	100.0	4.678928428628549	1.1073768736355236	1.273041506159102	0.9030349321970172	0.9994560040219307	0.9871579680076856	0.7415419064035237
29	30SER	29	0.12634020618556702	0.1833269507128983	53.33866453418633	0.0	1.1776611694152923	0.0	4.3443869972436975	0.2301820718629467	0.9996323933241119	3.2198813802753015	0.9989261666358153	2	0.09887519260400617	100.0	4.678928428628549	1.1073768736355236	1.273041506159102	0.9030349321970172	0.9994560040219307	0.9871579680076856	0.7415419064035237
150	151SER	150	0.07936170212765957	0.1567023322883884	39.464214314274294	0.0	1.1144883485309016	0.0	4.628309016886538	0.21606163208884	0.970348960459351	3.9289536320733367	0.9989037645629016	2	0.09887519260400617	100.0	4.678928428628549	1.1073768736355236	1.273041506159102	0.9030349321970172	0.9994560040219307	0.9871579680076856	0.7415419064035237
37	38ILE	37	0.06839024390243903	0.10558475454639954	54.178328668532586	0.0	1.2022140221402213	0.0	4.633013345138993	0.21584224466981314	0.9996816510496265	4.639265776182259	0.9968182402461373	2	0.09887519260400617	100.0	4.678928428628549	1.1073768736355236	1.273041506159102	0.9030349321970172	0.9994560040219307	0.9871579680076856	0.7415419064035237
153	154SER	153	0.06090909090909092	0.11543585309591485	11.235505797680927	0.0	1.0	0.0	4.697615669237448	0.21287394934169387	0.9968808146304687	4.041874471791563	0.9932737421866452	2	0.09887519260400617	100.0	4.678928428628549	1.1073768736355236	1.273041506159102	0.9030349321970172	0.9994560040219307	0.9871579680076856	0.7415419064035237
130	131PHE	130	0.06947058823529412	0.11273217487742865	46.58136745301879	0.0	1.3158798283261803	0.0	5.067952117994492	0.19731835990505045	0.9993577172554475	5.549789039829383	0.9991812302586242	2	0.09887519260400617	100.0	4.678928428628549	1.1073768736355236	1.273041506159102	0.9030349321970172	0.9994560040219307	0.9871579680076856	0.7415419064035237
26	27HIS	26	0.06643478260869565	0.10339196255321259	31.307477009196322	0.0	1.1123882503192848	0.0	5.287265948838246	0.1891336675091456	0.9996730333842987	6.440783722814828	0.9993939291470891	2	0.09887519260400617	100.0	4.678928428628549	1.1073768736355236	1.273041506159102	0.9030349321970172	0.9994560040219307	0.9871579680076856	0.7415419064035237
27	28THR	27	0.08326732673267327	0.1123564775229648	11.71531387445022	0.0	1.030716723549488	0.0	5.331855822064444	0.18755195814968784	0.9997361689663042	5.994736557402567	0.9987857295465778	2	0.09887519260400617	100.0	4.678928428628549	1.1073768736355236	1.273041506159102	0.9030349321970172	0.9994560040219307	0.9871579680076856	0.7415419064035237
30	31VAL	30	0.06905660377358491	0.11181629393100831	25.78968412634946	0.0	1.0201550387596898	0.0	5.635233570662101	0.17745493375929525	0.9995160310676718	5.1255960061067585	0.9964874296467858	2	0.09887519260400617	100.0	4.678928428628549	1.1073768736355236	1.273041506159102	0.9030349321970172	0.9994560040219307	0.9871579680076856	0.7415419064035237
127	128SER	127	0.06280276816608996	0.10430242423683074	37.98480607756897	0.0	1.1242105263157895	0.0	6.03727210450944	0.16563772225092632	0.9997254529820532	5.496991554362163	0.9989682591898909	2	0.09887519260400617	100.0	4.678928428628549	1.1073768736355236	1.273041506159102	0.9030349321970172	0.9994560040219307	0.9871579680076856	0.7415419064035237
192	193LYS	192	0.0914859437751004	0.13231564731850162	37.98480607756897	0.0	1.16	0.0	6.403657683115066	0.15616075210215624	0.9950975263293981	4.990039231206353	0.9982954804812522	2	0.09887519260400617	100.0	4.678928428628549	1.1073768736355236	1.273041506159102	0.9030349321970172	0.9994560040219307	0.9871579680076856	0.7415419064035237
44	45ASN	44	0.0467632850241546	0.08237804339539184	24.110355857656938	0.0	1.0132669983416251	0.0	6.440447117767391	0.15526872307378783	0.9994915528835061	6.878839997988353	0.9986112873062863	2	0.09887519260400617	100.0	4.678928428628549	1.1073768736355236	1.273041506159102	0.9030349321970172	0.9994560040219307	0.9871579680076856	0.7415419064035237
126	127SER	126	0.043860759493670895	0.06736190452846216	27.34906037584966	0.0	1.108187134502924	0.0	6.525106452201692	0.15325420471302525	0.9995272460901242	6.904065542058083	0.9994443133542898	2	0.09887519260400617	100.0	4.678928428628549	1.1073768736355236	1.273041506159102	0.9030349321970172	0.9994560040219307	0.9871579680076856	0.7415419064035237
41	42ILE	41	0.03517605633802817	0.06197998305856891	39.8640543782487	0.0	1.1474423269809428	0.0	6.905293975668258	0.14481642686374194	0.9955530647260402	7.399431841965621	0.9913295876589252	2	0.09887519260400617	100.0	4.678928428628549	1.1073768736355236	1.273041506159102	0.9030349321970172	0.9994560040219307	0.9871579680076856	0.7415419064035237
28	29ASN	28	0.05761904761904762	0.08788004605330532	0.9596161535385845	0.0	1.0	0.0	7.170587875778667	0.13945857959259836	0.996105276670702	10.07907350130187	0.9941895825052696	2	0.09887519260400617	100.0	4.678928428628549	1.1073768736355236	1.273041506159102	0.9030349321970172	0.9994560040219307	0.9871579680076856	0.7415419064035237
172	173PHE	172	0.04356	0.07005516683300383	24.71011595361855	0.0	1.1003236245954693	0.0	8.554651547671082	0.11689546843930072	0.9991989935495423	8.103966453785153	0.997573503141697	2	0.09887519260400617	100.0	4.678928428628549	1.1073768736355236	1.273041506159102	0.9030349321970172	0.9994560040219307	0.9871579680076856	0.7415419064035237
36	37THR	36	0.060561403508771934	0.0813463501685814	34.78608556577369	0.0	1.0942528735632184	0.0	8.797820791977987	0.11366451120620895	0.9998560645911967	8.795335754510644	0.9996312533778404	2	0.09887519260400617	100.0	4.678928428628549	1.1073768736355236	1.273041506159102	0.9030349321970172	0.9994560040219307	0.9871579680076856	0.7415419064035237
91	92ILE	91	0.0518421052631579	0.07246373308843347	19.95201919232307	0.0	1.0581162324649298	0.0	8.935089187848579	0.11191830086709895	0.9995420412435757	8.967297443095466	0.9980627152231248	2	0.09887519260400617	100.0	4.678928428628549	1.1073768736355236	1.273041506159102	0.9030349321970172	0.9994560040219307	0.9871579680076856	0.7415419064035237
90	91ALA	90	0.04960893854748603	0.07203632795888956	17.073170731707318	0.0	1.0023419203747073	0.0	9.003360202331114	0.11106964261421907	0.999561165375042	10.08710335728049	0.9986315328620563	2	0.09887519260400617	100.0	4.678928428628549	1.1073768736355236	1.273041506159102	0.9030349321970172	0.9994560040219307	0.9871579680076856	0.7415419064035237
129	130ALA	129	0.056952054794520555	0.07625631186018339	29.908036785285887	0.0	1.0989304812834224	0.0	9.971269209563586	0.10028813574112369	0.9997423680931211	10.291498528329818	0.9996624108302891	2	0.09887519260400617	100.0	4.678928428628549	1.1073768736355236	1.273041506159102	0.9030349321970172	0.9994560040219307	0.9871579680076856	0.7415419064035237
102	103LYS	102	0.03215686274509804	0.04716735849933395	3.9984006397441023	0.0	1.0	0.0	10.390878222264854	0.09623825615213825	0.9986863306974688	16.025374512433167	0.9952456154502425	2	0.09887519260400617	100.0	4.678928428628549	1.1073768736355236	1.273041506159102	0.9030349321970172	0.9994560040219307	0.9871579680076856	0.7415419064035237
109	110ASN	109	0.028124999999999997	0.02855230945125105	0.9596161535385845	0.0	1.0	0.0	10.693726438685202	0.09351277178574903	0.9951152700143333	18.510664017150045	0.9931550801071081	2	0.09887519260400617	100.0	4.678928428628549	1.1073768736355236	1.273041506159102	0.9030349321970172	0.9994560040219307	0.9871579680076856	0.7415419064035237
168	169ASP	168	0.02563380281690142	0.024479505332282173	3.7984806077568973	0.0	1.0105263157894737	0.0	10.841223189002092	0.09224051406066916	0.9972537072841157	30.768781013830015	0.9979468371558872	2	0.09887519260400617	100.0	4.678928428628549	1.1073768736355236	1.273041506159102	0.9030349321970172	0.9994560040219307	0.9871579680076856	0.7415419064035237
193	194ASP	193	0.04377777777777778	0.061401733196272026	6.877249100359856	0.0	1.005813953488372	0.0	11.050548131405144	0.09049324867044799	0.9992299895751071	12.54648396742639	0.9977795665587456	2	0.09887519260400617	100.0	4.678928428628549	1.1073768736355236	1.273041506159102	0.9030349321970172	0.9994560040219307	0.9871579680076856	0.7415419064035237
128	129ASN	128	0.047658536585365854	0.0600559128731647	35.265893642542984	0.0	1.1111111111111112	0.0	11.830132534609447	0.08452990675078802	0.999919578418804	12.380490077393015	0.9996597311843735	2	0.09887519260400617	100.0	4.678928428628549	1.1073768736355236	1.273041506159102	0.9030349321970172	0.9994560040219307	0.9871579680076856	0.7415419064035237
169	170THR	169	0.036630434782608697	0.0489959442401601	6.1975209916033585	0.0	1.0129032258064516	0.0	11.946843592488138	0.08370411751508773	0.9996141159534961	11.762258359670025	0.9987745175699347	2	0.09887519260400617	100.0	4.678928428628549	1.1073768736355236	1.273041506159102	0.9030349321970172	0.9994560040219307	0.9871579680076856	0.7415419064035237
124	125ASN	124	0.024693877551020413	0.03396288735690267	5.757696921231507	0.0	1.1041666666666667	0.0	13.547371937621287	0.0738150546544738	0.9978409318815508	15.976237638779375	0.9977612807221738	2	0.09887519260400617	100.0	4.678928428628549	1.1073768736355236	1.273041506159102	0.9030349321970172	0.9994560040219307	0.9871579680076856	0.7415419064035237
161	162GLU	161	0.020833333333333332	0.01977301752950779	0.5597760895641744	0.0	1.0	0.0	13.753190435877109	0.07271040160916852	0.9917482970512969	30.471386398301764	0.9933414148937849	2	0.09887519260400617	100.0	4.678928428628549	1.1073768736355236	1.273041506159102	0.9030349321970172	0.9994560040219307	0.9871579680076856	0.7415419064035237
125	126THR	125	0.03041062801932367	0.03602971778093339	26.94922031187525	0.0	1.1335311572700297	0.0	13.844370910456021	0.07223152330054561	0.9996755003958604	13.405635301948298	0.9994890008335098	2	0.09887519260400617	100.0	4.678928428628549	1.1073768736355236	1.273041506159102	0.9030349321970172	0.9994560040219307	0.9871579680076856	0.7415419064035237
87	88ILE	87	0.03085294117647059	0.03834259829863722	20.991603358656537	0.0	1.036190476190476	0.0	16.153543087225664	0.061905923338317466	0.9998852495412738	16.435373518179823	0.9996459013504981	2	0.09887519260400617	100.0	4.678928428628549	1.1073768736355236	1.273041506159102	0.9030349321970172	0.9994560040219307	0.9871579680076856	0.7415419064035237
38	39PHE	38	0.04318295739348371	0.0525909557990281	71.69132347061175	0.0	1.407696597880647	0.0	16.706996331424516	0.059855163678888254	0.9996505135266484	15.185333407085398	0.9992688562614334	2	0.09887519260400617	100.0	4.678928428628549	1.1073768736355236	1.273041506159102	0.9030349321970172	0.9994560040219307	0.9871579680076856	0.7415419064035237
156	157ASP	156	0.04666666666666667	0.05382585087318381	1.4394242303078768	0.0	1.0	0.0	17.375192228648586	0.05755332009226227	0.997338495779672	14.823811069983396	0.9978329230883048	2	0.09887519260400617	100.0	4.678928428628549	1.1073768736355236	1.273041506159102	0.9030349321970172	0.9994560040219307	0.9871579680076856	0.7415419064035237
88	89ALA	88	0.07	0.0	0.11995201919232307	0.0	1.0	0.0	17.583514393475816	0.056871452294601575	0.9771998407642095	17.583514393475813	0.9771998407642094	2	0.09887519260400617	100.0	4.678928428628549	1.1073768736355236	1.273041506159102	0.9030349321970172	0.9994560040219307	0.9871579680076856	0.7415419064035237
466	467SER	466	0.0325	0.03344772040064913	0.23990403838464613	0.0	1.0	0.0	17.772696269887373	0.05626608280558531	0.9897516368545217	20.57864075278941	0.8892472886690361	2	0.09887519260400617	100.0	4.678928428628549	1.1073768736355236	1.273041506159102	0.9030349321970172	0.9994560040219307	0.9871579680076856	0.7415419064035237
174	175ARG	174	0.02198757763975155	0.026252947205776988	8.396641343462615	0.0	1.0523809523809524	0.0	19.75153348532275	0.05062898031401431	0.9997003481146156	22.271059911685416	0.997012701366146	2	0.09887519260400617	100.0	4.678928428628549	1.1073768736355236	1.273041506159102	0.9030349321970172	0.9994560040219307	0.9871579680076856	0.7415419064035237
92	93ASN	92	0.039599999999999996	0.04113198268987285	1.7592962814874051	0.0	1.0	0.0	21.662527513583083	0.046162664969402516	0.999352741073942	17.607011683099962	0.9977548848323472	2	0.09887519260400617	100.0	4.678928428628549	1.1073768736355236	1.273041506159102	0.9030349321970172	0.9994560040219307	0.9871579680076856	0.7415419064035237
86	87LEU	86	0.02703180212014134	0.039916286684619835	16.953218712514992	0.0	1.0495283018867925	0.0	23.834262628934773	0.041956406018032244	0.9669130741967573	11.81346348132502	0.996454812409256	2	0.09887519260400617	100.0	4.678928428628549	1.1073768736355236	1.273041506159102	0.9030349321970172	0.9994560040219307	0.9871579680076856	0.7415419064035237
137	138ILE	137	0.0292687074829932	0.032518585586299435	36.5453818472611	0.0	1.1214442013129102	0.0	24.74297006372866	0.0404155199405881	0.9998446442970299	25.6194494368405	0.9979746273894475	2	0.09887519260400617	100.0	4.678928428628549	1.1073768736355236	1.273041506159102	0.9030349321970172	0.9994560040219307	0.9871579680076856	0.7415419064035237
48	49GLN	48	0.02632768361581921	0.027382310503912367	10.395841663334666	0.0	1.0038461538461538	0.0	28.034217673943683	0.03567069399369924	0.9996498189713752	29.2943946100627	0.9988885599947276	2	0.09887519260400617	100.0	4.678928428628549	1.1073768736355236	1.273041506159102	0.9030349321970172	0.9994560040219307	0.9871579680076856	0.7415419064035237
45	46ALA	45	0.02049315068493151	0.022238509908487504	18.39264294282287	0.0	1.05	0.0	29.469715690032164	0.033933140398033766	0.9996338481466751	32.86301063877779	0.999490667000695	2	0.09887519260400617	100.0	4.678928428628549	1.1073768736355236	1.273041506159102	0.9030349321970172	0.9994560040219307	0.9871579680076856	0.7415419064035237
164	165ASP	164	0.017142857142857144	0.0153197218496623	0.6397441023590564	0.0	1.0	0.0	41.266007866241814	0.024233020146784367	0.9972362360731598	69.8059590902423	0.996909747245396	2	0.09887519260400617	100.0	4.678928428628549	1.1073768736355236	1.273041506159102	0.9030349321970172	0.9994560040219307	0.9871579680076856	0.7415419064035237
165	166GLU	165	0.018333333333333337	0.010671873729054747	0.2798880447820872	0.0	1.0	0.0	58.374988434699176	0.017130624378943457	0.9991771873300915	53.17344773993049	0.8954575597022745	2	0.09887519260400617	100.0	4.678928428628549	1.1073768736355236	1.273041506159102	0.9030349321970172	0.9994560040219307	0.9871579680076856	0.7415419064035237
136	137TYR	136	0.019243697478991597	0.019016121593171835	5.47780887644942	0.0	1.0072992700729928	0.0	60.40556072381907	0.016554767276676912	0.9895248405825761	22.98008000238719	0.999361157469845	2	0.09887519260400617	100.0	4.678928428628549	1.1073768736355236	1.273041506159102	0.9030349321970172	0.9994560040219307	0.9871579680076856	0.7415419064035237
149	150ASP	149	0.015789473684210527	0.010913916501751433	0.7996801279488205	0.0	1.0	0.0	75.75446566716084	0.013200541924401623	0.9992931450836136	52.274451975168404	0.9978790257706638	2	0.09887519260400617	100.0	4.678928428628549	1.1073768736355236	1.273041506159102	0.9030349321970172	0.9994560040219307	0.9871579680076856	0.7415419064035237
158	159GLU	158	0.013181818181818178	0.005548434370788047	0.9596161535385845	0.0	1.0	0.0	102.46162361287203	0.00975975164885414	0.9998824530985277	95.18270686644487	0.9991860741580773	2	0.09887519260400617	100.0	4.678928428628549	1.1073768736355236	1.273041506159102	0.9030349321970172	0.9994560040219307	0.9871579680076856	0.7415419064035237
1222	1223ILE	1222	0.4075	0.6134278686202641	8.076769292283087	0.0	1.0	0.0	0.9172947549040247	1.0901621258094174	0.9954173681534889	1.3276208072835085	0.9893597388387922	12	0.03200680272108843	28.54858056777289	1.0854341736694677	1.6549815820861238	2.560087591658463	0.6042363315847227	0.9364508856085468	0.9711086948331221	0.8687177325480504
416	417ILE	416	0.3111111111111111	0.2881914658480614	7.197121151539384	0.0	1.0	0.0	2.216435984340025	0.4511747720508896	0.9975742508772877	2.359101479771433	0.9922542595136854	12	0.03200680272108843	28.54858056777289	1.0854341736694677	1.6549815820861238	2.560087591658463	0.6042363315847227	0.9364508856085468	0.9711086948331221	0.8687177325480504
1221	1222ALA	1221	0.1675	0.1939233095839693	5.237904838064774	0.0	1.0076335877862594	0.0	2.499462125292008	0.4000860784730521	0.9982491251453165	4.970403620523325	0.9964998207898208	12	0.03200680272108843	28.54858056777289	1.0854341736694677	1.6549815820861238	2.560087591658463	0.6042363315847227	0.9364508856085468	0.9711086948331221	0.8687177325480504
1303	1304LEU	1303	0.026176470588235298	0.03895810010785743	2.7189124350259894	0.0	1.0	0.0	2.714937402348648	0.36833261758997327	0.9793093585963142	24.448090852505164	0.9909489084363079	12	0.03200680272108843	28.54858056777289	1.0854341736694677	1.6549815820861238	2.560087591658463	0.6042363315847227	0.9364508856085468	0.9711086948331221	0.8687177325480504
420	421SER	420	0.18	0.2104281350010022	5.717712914834066	0.0	1.0	0.0	2.9142597169342306	0.3431403159399908	0.9974118286192893	5.085013704254472	0.9956341661083293	12	0.03200680272108843	28.54858056777289	1.0854341736694677	1.6549815820861238	2.560087591658463	0.6042363315847227	0.9364508856085468	0.9711086948331221	0.8687177325480504
424	425LYS	424	0.060384615384615384	0.06423998091476206	3.9984006397441023	0.0	1.0	0.0	4.096939211556836	0.24408465646235455	0.9968507804073542	9.768821113880037	0.9969337193998667	12	0.03200680272108843	28.54858056777289	1.0854341736694677	1.6549815820861238	2.560087591658463	0.6042363315847227	0.9364508856085468	0.9711086948331221	0.8687177325480504
412	413TYR	412	0.04050000000000001	0.1080034721664077	10.95561775289884	0.0	1.0218978102189782	0.0	4.626206217842078	0.2161598408958207	0.988853214286682	3.9931492730567646	0.9880987042129424	12	0.03200680272108843	28.54858056777289	1.0854341736694677	1.6549815820861238	2.560087591658463	0.6042363315847227	0.9364508856085468	0.9711086948331221	0.8687177325480504
1307	1308ALA	1307	0.03625	0.0342554740151118	0.6397441023590564	0.0	1.0	0.0	4.9181871239829595	0.20332695255201208	0.9959957432070168	19.20338151624642	0.996247152042194	12	0.03200680272108843	28.54858056777289	1.0854341736694677	1.6549815820861238	2.560087591658463	0.6042363315847227	0.9364508856085468	0.9711086948331221	0.8687177325480504
1224	1225LEU	1224	0.124	0.12117755567760888	5.917632946821271	0.0	1.0	0.0	5.134362716918853	0.1947661384936402	0.9969795557103975	5.574156499363139	0.9964473477932749	12	0.03200680272108843	28.54858056777289	1.0854341736694677	1.6549815820861238	2.560087591658463	0.6042363315847227	0.9364508856085468	0.9711086948331221	0.8687177325480504
1218	1219ILE	1218	0.03321428571428572	0.07380251502821429	12.994802079168332	0.0	1.0246153846153847	0.0	5.1611053169644805	0.19375694518633713	0.9972867874415282	7.287613325284552	0.9866725952797818	12	0.03200680272108843	28.54858056777289	1.0854341736694677	1.6549815820861238	2.560087591658463	0.6042363315847227	0.9364508856085468	0.9711086948331221	0.8687177325480504
1223	1224SER	1223	0.085	0.08845903006477067	4.078368652538985	0.0	1.0	0.0	7.498566419090653	0.1333588240885742	0.9986685098951263	6.755628655898325	0.9960084840216407	12	0.03200680272108843	28.54858056777289	1.0854341736694677	1.6549815820861238	2.560087591658463	0.6042363315847227	0.9364508856085468	0.9711086948331221	0.8687177325480504
422	423LYS	422	0.026060606060606062	0.023605263144424786	2.5589764094362257	0.0	1.0	0.0	7.5270624739803615	0.1328539524491542	0.9975437130852833	33.08600278660207	0.9980518427637364	12	0.03200680272108843	28.54858056777289	1.0854341736694677	1.6549815820861238	2.560087591658463	0.6042363315847227	0.9364508856085468	0.9711086948331221	0.8687177325480504
423	424SER	423	0.07851851851851853	0.09609808660767948	4.678128748500599	0.0	1.0	0.0	8.191782018448935	0.12207356076466302	0.9980631152467605	5.362600584136878	0.995479928852769	12	0.03200680272108843	28.54858056777289	1.0854341736694677	1.6549815820861238	2.560087591658463	0.6042363315847227	0.9364508856085468	0.9711086948331221	0.8687177325480504
426	427LYS	426	0.028333333333333335	0.023213980461973534	1.9992003198720512	0.0	1.0	0.0	13.219187129921398	0.07564761661755416	0.9995670095986859	34.68765391318347	0.99746013535284	12	0.03200680272108843	28.54858056777289	1.0854341736694677	1.6549815820861238	2.560087591658463	0.6042363315847227	0.9364508856085468	0.9711086948331221	0.8687177325480504
409	410SER	409	0.03409638554216868	0.04461444318998683	6.877249100359856	0.0	1.0	0.0	18.342468790593127	0.054518288209537344	0.9994999901268938	16.83971229016841	0.9983797216855053	12	0.03200680272108843	28.54858056777289	1.0854341736694677	1.6549815820861238	2.560087591658463	0.6042363315847227	0.9364508856085468	0.9711086948331221	0.8687177325480504
419	420PHE	419	0.028833333333333332	0.03276642929720736	5.1179528188724515	0.0	1.0	0.0	19.989937338532886	0.05002516931718369	0.9991218775741705	22.778431261977012	0.997267526807371	12	0.03200680272108843	28.54858056777289	1.0854341736694677	1.6549815820861238	2.560087591658463	0.6042363315847227	0.9364508856085468	0.9711086948331221	0.8687177325480504
1302	1303PRO	1302	0.06	0.0	0.07996801279488205	0.0	1.0	0.0	20.374942120637414	0.04907989402272304	0.977103874369469	20.37494212063741	0.9771038743694691	12	0.03200680272108843	28.54858056777289	1.0854341736694677	1.6549815820861238	2.560087591658463	0.6042363315847227	0.9364508856085468	0.9711086948331221	0.8687177325480504
1219	1220TYR	1219	0.03538461538461539	0.032726226747973305	1.1595361855257897	0.0	1.0	0.0	20.774306129771944	0.0481363850976898	0.9989798847515834	26.89605174915929	0.9966458147095885	12	0.03200680272108843	28.54858056777289	1.0854341736694677	1.6549815820861238	2.560087591658463	0.6042363315847227	0.9364508856085468	0.9711086948331221	0.8687177325480504
1299	1300PHE	1299	0.018235294117647058	0.019900891362306744	6.597361055577769	0.0	1.0242424242424242	0.0	21.773615970859243	0.04592714417937525	0.9988673812282615	26.139646069002225	0.9969388429254071	12	0.03200680272108843	28.54858056777289	1.0854341736694677	1.6549815820861238	2.560087591658463	0.6042363315847227	0.9364508856085468	0.9711086948331221	0.8687177325480504
1321	1322LEU	1321	0.0246875	0.02633728049267806	2.199120351859256	0.0	1.0	0.0	26.179798508671837	0.038197391002408154	0.9982063483378105	21.337740124809	0.9958539082078438	12	0.03200680272108843	28.54858056777289	1.0854341736694677	1.6549815820861238	2.560087591658463	0.6042363315847227	0.9364508856085468	0.9711086948331221	0.8687177325480504
1230	1231ILE	1230	0.03	0.021602468994692866	0.19992003198720512	0.0	1.0	0.0	27.32981591946826	0.03659007447934016	0.9947242881600585	35.496070735009766	0.9886169157477298	12	0.03200680272108843	28.54858056777289	1.0854341736694677	1.6549815820861238	2.560087591658463	0.6042363315847227	0.9364508856085468	0.9711086948331221	0.8687177325480504
1308	1309TYR	1308	0.023823529411764705	0.022362614006200425	2.199120351859256	0.0	1.018181818181818	0.0	28.40448841312776	0.035205703600626304	0.9971346868196643	31.34201440363899	0.9959829510194396	12	0.03200680272108843	28.54858056777289	1.0854341736694677	1.6549815820861238	2.560087591658463	0.6042363315847227	0.9364508856085468	0.9711086948331221	0.8687177325480504
1229	1230LYS	1229	0.036666666666666674	0.004714045207910318	0.11995201919232307	0.0	1.0	0.0	32.29949543283146	0.030960235960328042	0.9809372042317266	33.008369915861536	0.980810837061914	12	0.03200680272108843	28.54858056777289	1.0854341736694677	1.6549815820861238	2.560087591658463	0.6042363315847227	0.9364508856085468	0.9711086948331221	0.8687177325480504
1322	1323TRP	1322	0.022142857142857148	0.022734043518342212	0.9596161535385845	0.0	1.0	0.0	36.41261375661886	0.027463010666687618	0.9979717167429822	41.29379271907713	0.9957910825437397	12	0.03200680272108843	28.54858056777289	1.0854341736694677	1.6549815820861238	2.560087591658463	0.6042363315847227	0.9364508856085468	0.9711086948331221	0.8687177325480504
1225	1226TYR	1225	0.019	0.012206555615733703	0.39984006397441024	0.0	1.0	0.0	36.667149048628204	0.027272368480947173	0.9995891502025059	76.2601714958251	0.9983677312580349	12	0.03200680272108843	28.54858056777289	1.0854341736694677	1.6549815820861238	2.560087591658463	0.6042363315847227	0.9364508856085468	0.9711086948331221	0.8687177325480504
1228	1229GLN	1228	0.021	0.017	0.5997600959616154	0.0	1.0	0.0	37.07259351778329	0.026974104186164145	0.9924347817619329	31.222204340830775	0.991473484409543	12	0.03200680272108843	28.54858056777289	1.0854341736694677	1.6549815820861238	2.560087591658463	0.6042363315847227	0.9364508856085468	0.9711086948331221	0.8687177325480504
1309	1310TYR	1309	0.025	0.021794494717703367	0.6397441023590564	0.0	1.0	0.0	37.8817262764698	0.026397952213206004	0.9963478493932518	62.61610208984723	0.9953528170988688	12	0.03200680272108843	28.54858056777289	1.0854341736694677	1.6549815820861238	2.560087591658463	0.6042363315847227	0.9364508856085468	0.9711086948331221	0.8687177325480504
1226	1227SER	1226	0.023333333333333334	0.01825741858350554	0.9996001599360256	0.0	1.0	0.0	48.78609413987069	0.02049764420847015	0.9988502411501805	34.11205089701072	0.9978864672599741	12	0.03200680272108843	28.54858056777289	1.0854341736694677	1.6549815820861238	2.560087591658463	0.6042363315847227	0.9364508856085468	0.9711086948331221	0.8687177325480504
1318	1319PRO	1318	0.021249999999999998	0.012686114456365274	0.5197920831667333	0.0	1.0	0.0	49.32788960232719	0.020272507258304075	0.9992156144875647	72.3524945365386	0.9969401483912572	12	0.03200680272108843	28.54858056777289	1.0854341736694677	1.6549815820861238	2.560087591658463	0.6042363315847227	0.9364508856085468	0.9711086948331221	0.8687177325480504
427	428TYR	427	0.019999999999999997	0.014638501094227999	1.719312275089964	0.0	1.0	0.0	64.18277549149923	0.015580504151498501	0.9998463522305229	48.758975976126095	0.9992260227797736	12	0.03200680272108843	28.54858056777289	1.0854341736694677	1.6549815820861238	2.560087591658463	0.6042363315847227	0.9364508856085468	0.9711086948331221	0.8687177325480504
1320	1321ASP	1320	0.014736842105263156	0.005954583420518295	0.7996801279488205	0.0	1.0	0.0	80.35587378875412	0.012444640980805947	0.9982794407398539	96.88055816173467	0.9977540955861078	12	0.03200680272108843	28.54858056777289	1.0854341736694677	1.6549815820861238	2.560087591658463	0.6042363315847227	0.9364508856085468	0.9711086948331221	0.8687177325480504
413	414SER	413	0.014000000000000002	0.004898979485566357	0.23990403838464613	0.0	1.0	0.0	86.488705490105	0.011562203345897089	0.9972269941852094	93.41887261483717	0.9953431660301432	12	0.03200680272108843	28.54858056777289	1.0854341736694677	1.6549815820861238	2.560087591658463	0.6042363315847227	0.9364508856085468	0.9711086948331221	0.8687177325480504
1215	1216PRO	1215	0.012727272727272728	0.00616575453011388	0.9996001599360256	0.0	1.0	0.0	126.99054430362413	0.007874602046031716	0.9995859712059751	124.08136884693442	0.9993071485657914	12	0.03200680272108843	28.54858056777289	1.0854341736694677	1.6549815820861238	2.560087591658463	0.6042363315847227	0.9364508856085468	0.9711086948331221	0.8687177325480504
1295	1296GLY	1295	0.01	0.0	0.1599360255897641	0.0	1.0	0.0	0.0	0.0	-0.00040016006402532334	0.0	-0.00040016006402532334	12	0.03200680272108843	28.54858056777289	1.0854341736694677	1.6549815820861238	2.560087591658463	0.6042363315847227	0.9364508856085468	0.9711086948331221	0.8687177325480504
1313	1314SER	1313	0.01	0.0	0.07996801279488205	0.0	1.0	0.0	0.0	0.0	-0.00040016006402532334	0.0	-0.00040016006402532334	12	0.03200680272108843	28.54858056777289	1.0854341736694677	1.6549815820861238	2.560087591658463	0.6042363315847227	0.9364508856085468	0.9711086948331221	0.8687177325480504
1319	1320PHE	1319	0.01	0.0	0.11995201919232307	0.0	1.0	0.0	0.0	0.0	-0.00040016006402532334	0.0	-0.00040016006402532334	12	0.03200680272108843	28.54858056777289	1.0854341736694677	1.6549815820861238	2.560087591658463	0.6042363315847227	0.9364508856085468	0.9711086948331221	0.8687177325480504
1408	1409TYR	1408	0.061984126984126996	0.1703265763326153	56.77728908436625	0.0	1.1830985915492958	0.0	1.0502854677302356	0.9521220951110491	0.9894423266407839	1.6477659554385486	0.9907762340736272	9	0.06191387559808613	94.72211115553779	2.3440270156184044	2.0974171715749024	1.863897005809633	0.4767768727902246	0.9190271492955504	0.9639515074222933	0.6117369062011452
1400	1401LEU	1400	0.0664406779661017	0.07432778324591839	21.391443422630946	0.0	1.0018691588785047	0.0	1.927892218790711	0.5187011961837056	0.9992571377807262	8.19098662440696	0.9993339223342705	9	0.06191387559808613	94.72211115553779	2.3440270156184044	2.0974171715749024	1.863897005809633	0.4767768727902246	0.9190271492955504	0.9639515074222933	0.6117369062011452
1415	1416LYS	1415	0.07920265780730897	0.1954244774117961	58.13674530187925	0.0	1.2173314993122422	0.0	2.21511520836919	0.4514437877640771	0.9984264928701244	2.3384296199719077	0.9952555190056083	9	0.06191387559808613	94.72211115553779	2.3440270156184044	2.0974171715749024	1.863897005809633	0.4767768727902246	0.9190271492955504	0.9639515074222933	0.6117369062011452
1345	1346TYR	1345	0.10292307692307692	0.17533022098466808	37.98480607756897	0.0	1.0063157894736843	0.0	2.718913766313981	0.3677939375604749	0.9992204858385206	2.8725172694509675	0.9986950207635135	9	0.06191387559808613	94.72211115553779	2.3440270156184044	2.0974171715749024	1.863897005809633	0.4767768727902246	0.9190271492955504	0.9639515074222933	0.6117369062011452
1347	1348LEU	1347	0.14208333333333334	0.25054350642375695	45.181927229108354	0.0	1.0831858407079646	0.0	3.395525753099123	0.2945052026441832	0.9969477279023866	1.9881554562580388	0.9968461750746027	9	0.06191387559808613	94.72211115553779	2.3440270156184044	2.0974171715749024	1.863897005809633	0.4767768727902246	0.9190271492955504	0.9639515074222933	0.6117369062011452
1342	1343LEU	1342	0.193972602739726	0.2498971828354937	31.427429028388644	0.0	1.0038167938931297	0.0	3.3985194922918844	0.2942457744521049	0.9991530582185463	2.978842742299565	0.9982740231144938	9	0.06191387559808613	94.72211115553779	2.3440270156184044	2.0974171715749024	1.863897005809633	0.4767768727902246	0.9190271492955504	0.9639515074222933	0.6117369062011452
1341	1342LEU	1341	0.12432432432432436	0.16070016634210835	22.31107556977209	0.0	1.0	0.0	3.992782053845543	0.2504519371491555	0.9991285790778003	4.115095757050419	0.9988669392867525	9	0.06191387559808613	94.72211115553779	2.3440270156184044	2.0974171715749024	1.863897005809633	0.4767768727902246	0.9190271492955504	0.9639515074222933	0.6117369062011452
1346	1347TYR	1346	0.08826291079812207	0.1634409525254282	40.58376649340264	0.0	1.0886699507389161	0.0	4.2106137144379385	0.23749507027231226	0.9998610446192815	3.6233873320391354	0.9979222847482087	9	0.06191387559808613	94.72211115553779	2.3440270156184044	2.0974171715749024	1.863897005809633	0.4767768727902246	0.9190271492955504	0.9639515074222933	0.6117369062011452
1412	1413VAL	1412	0.04759894459102902	0.07566268428413944	38.024790083966415	0.0	1.1303890641430074	0.0	4.712570930149558	0.21219839760974465	0.9995422476519885	6.839202060294549	0.9994927512352936	9	0.06191387559808613	94.72211115553779	2.3440270156184044	2.0974171715749024	1.863897005809633	0.4767768727902246	0.9190271492955504	0.9639515074222933	0.6117369062011452
1411	1412LYS	1411	0.07218934911242604	0.11070751327722093	26.62934826069572	0.0	1.018018018018018	0.0	4.928011465679108	0.2029216057966688	0.999718728692604	4.741419033892413	0.9981760240838543	9	0.06191387559808613	94.72211115553779	2.3440270156184044	2.0974171715749024	1.863897005809633	0.4767768727902246	0.9190271492955504	0.9639515074222933	0.6117369062011452
1414	1415LYS	1414	0.037314814814814815	0.08824006062463795	10.59576169532187	0.0	1.0075471698113208	0.0	5.732095605685253	0.1744562667461743	0.9684778723703074	4.304192522502514	0.9891227248596319	9	0.06191387559808613	94.72211115553779	2.3440270156184044	2.0974171715749024	1.863897005809633	0.4767768727902246	0.9190271492955504	0.9639515074222933	0.6117369062011452
1338	1339ILE	1338	0.08971631205673757	0.09792849658366386	21.47141143542583	0.0	1.0018621973929236	0.0	6.857391750223328	0.14582804022643633	0.9994173492630832	6.177494255651552	0.9988255144073349	9	0.06191387559808613	94.72211115553779	2.3440270156184044	2.0974171715749024	1.863897005809633	0.4767768727902246	0.9190271492955504	0.9639515074222933	0.6117369062011452
1257	1258ASP	1257	0.04207547169811321	0.04747823694355201	4.4382247101159535	0.0	1.0	0.0	7.496352864617186	0.13339820284074458	0.9983776735778802	13.75059199675635	0.9979227372851905	9	0.06191387559808613	94.72211115553779	2.3440270156184044	2.0974171715749024	1.863897005809633	0.4767768727902246	0.9190271492955504	0.9639515074222933	0.6117369062011452
1401	1402PHE	1401	0.03649754500818331	0.06645457632175492	48.540583766493405	0.0	1.187808896210873	0.0	8.721765067314228	0.11465569093893732	0.9998785698437265	9.431848885504005	0.99973699074085	9	0.06191387559808613	94.72211115553779	2.3440270156184044	2.0974171715749024	1.863897005809633	0.4767768727902246	0.9190271492955504	0.9639515074222933	0.6117369062011452
1409	1410VAL	1409	0.025074257425742576	0.020067816475938527	24.790083966413434	0.0	1.0870967741935484	0.0	9.737684648957778	0.10269381645122691	0.9998936077329129	31.063020891518484	0.9998780246397262	9	0.06191387559808613	94.72211115553779	2.3440270156184044	2.0974171715749024	1.863897005809633	0.4767768727902246	0.9190271492955504	0.9639515074222933	0.6117369062011452
1256	1257LYS	1256	0.04776315789473685	0.06123936393604083	15.353858456617353	0.0	1.0364583333333333	0.0	12.152222491797977	0.08228947426488778	0.9994788375690528	13.151671715799967	0.9976648099022498	9	0.06191387559808613	94.72211115553779	2.3440270156184044	2.0974171715749024	1.863897005809633	0.4767768727902246	0.9190271492955504	0.9639515074222933	0.6117369062011452
1344	1345THR	1344	0.03928571428571429	0.042504501562319545	0.7996801279488205	0.0	1.0	0.0	13.261592039326787	0.07540572783678876	0.9962330733265785	22.03858771982984	0.9959332146961873	9	0.06191387559808613	94.72211115553779	2.3440270156184044	2.0974171715749024	1.863897005809633	0.4767768727902246	0.9190271492955504	0.9639515074222933	0.6117369062011452
1352	1353ILE	1352	0.03470219435736677	0.04384164681196175	26.62934826069572	0.0	1.0435435435435436	0.0	13.517561445093417	0.07397784016457927	0.999807660056092	16.408634242304764	0.9973123713836032	9	0.06191387559808613	94.72211115553779	2.3440270156184044	2.0974171715749024	1.863897005809633	0.4767768727902246	0.9190271492955504	0.9639515074222933	0.6117369062011452
1348	1349ASN	1348	0.03843260188087774	0.04483394303526236	27.548980407836865	0.0	1.060957910014514	0.0	13.78312990732767	0.07255246135845818	0.9999071873711435	14.240041813650702	0.9997530664937774	9	0.06191387559808613	94.72211115553779	2.3440270156184044	2.0974171715749024	1.863897005809633	0.4767768727902246	0.9190271492955504	0.9639515074222933	0.6117369062011452
1356	1357SER	1356	0.03735955056179775	0.04316541145252088	26.94922031187525	0.0	1.0519287833827893	0.0	16.042142895417513	0.06233581177522444	0.9998542548039527	17.180535646039335	0.9991164257581792	9	0.06191387559808613	94.72211115553779	2.3440270156184044	2.0974171715749024	1.863897005809633	0.4767768727902246	0.9190271492955504	0.9639515074222933	0.6117369062011452
1397	1398VAL	1397	0.03817567567567568	0.04556013492971386	20.831667333066772	0.0	1.0479846449136276	0.0	17.01839008694775	0.058759964655349495	0.9998192516486766	16.018748008142037	0.9988631648849395	9	0.06191387559808613	94.72211115553779	2.3440270156184044	2.0974171715749024	1.863897005809633	0.4767768727902246	0.9190271492955504	0.9639515074222933	0.6117369062011452
1349	1350THR	1349	0.04352490421455939	0.04368807442784641	27.309076369452217	0.0	1.0849194729136165	0.0	19.783046816903056	0.05054833106625309	0.9999779166144028	17.03585265329386	0.9997509765817032	9	0.06191387559808613	94.72211115553779	2.3440270156184044	2.0974171715749024	1.863897005809633	0.4767768727902246	0.9190271492955504	0.9639515074222933	0.6117369062011452
1413	1414TYR	1413	0.029614512471655325	0.02384922723545362	34.02638944422231	0.0	1.1421856639247943	0.0	23.035311296356056	0.04341161216076943	0.9999363455110272	26.529779800777533	0.9998636522201464	9	0.06191387559808613	94.72211115553779	2.3440270156184044	2.0974171715749024	1.863897005809633	0.4767768727902246	0.9190271492955504	0.9639515074222933	0.6117369062011452
1417	1418PHE	1417	0.021446078431372546	0.018906815720785213	23.15073970411835	0.0	1.077720207253886	0.0	27.090092022282946	0.03691386500929751	0.9999772870505709	25.40335463327366	0.9999002664738704	9	0.06191387559808613	94.72211115553779	2.3440270156184044	2.0974171715749024	1.863897005809633	0.4767768727902246	0.9190271492955504	0.9639515074222933	0.6117369062011452
1360	1361ILE	1360	0.02201195219123506	0.020299938584821264	26.349460215913634	0.0	1.0819423368740515	0.0	30.47159506812658	0.032817448438923515	0.9999598022873765	32.43312132035943	0.9998942102677362	9	0.06191387559808613	94.72211115553779	2.3440270156184044	2.0974171715749024	1.863897005809633	0.4767768727902246	0.9190271492955504	0.9639515074222933	0.6117369062011452
583	584ILE	583	0.020192307692307693	0.018894822036811074	8.716513394642144	0.0	1.0275229357798166	0.0	34.61422506518703	0.02888985664468166	0.9998822750136865	42.35449393029586	0.9997478088743345	9	0.06191387559808613	94.72211115553779	2.3440270156184044	2.0974171715749024	1.863897005809633	0.4767768727902246	0.9190271492955504	0.9639515074222933	0.6117369062011452
1396	1397PHE	1396	0.02210526315789474	0.021046051603297058	2.199120351859256	0.0	1.0363636363636364	0.0	36.87993470682617	0.027115015467066655	0.9996575163056621	36.1357922723235	0.9989133679375628	9	0.06191387559808613	94.72211115553779	2.3440270156184044	2.0974171715749024	1.863897005809633	0.4767768727902246	0.9190271492955504	0.9639515074222933	0.6117369062011452
1334	1335VAL	1334	0.022666666666666665	0.020308728282303755	13.034786085565774	0.0	1.0	0.0	40.603322129640794	0.02462852662171677	0.9999422856534466	37.1248332642383	0.9998370588633483	9	0.06191387559808613	94.72211115553779	2.3440270156184044	2.0974171715749024	1.863897005809633	0.4767768727902246	0.9190271492955504	0.9639515074222933	0.6117369062011452
1416	1417ASN	1416	0.02727027027027027	0.025316535189101375	25.989604158336665	0.0	1.0676923076923077	0.0	40.68263305196727	0.024580513230857446	0.9989487598926846	24.59519795031461	0.9998182887067621	9	0.06191387559808613	94.72211115553779	2.3440270156184044	2.0974171715749024	1.863897005809633	0.4767768727902246	0.9190271492955504	0.9639515074222933	0.6117369062011452
1418	1419CYS	1418	0.015714285714285712	0.01105595571719709	12.355057976809276	0.0	1.029126213592233	0.0	42.84917850917018	0.023337670284297035	0.99997434667875	56.57977391974832	0.9999285203785295	9	0.06191387559808613	94.72211115553779	2.3440270156184044	2.0974171715749024	1.863897005809633	0.4767768727902246	0.9190271492955504	0.9639515074222933	0.6117369062011452
1393	1394TRP	1393	0.021085714285714284	0.01751631309636237	19.752099160335867	0.0	1.0364372469635628	0.0	51.38120230133189	0.01946237057932913	0.999759232632747	51.600774838235296	0.9996026996401873	9	0.06191387559808613	94.72211115553779	2.3440270156184044	2.0974171715749024	1.863897005809633	0.4767768727902246	0.9190271492955504	0.9639515074222933	0.6117369062011452
1259	1260SER	1259	0.015	0.007637626158259733	0.2798880447820872	0.0	1.0	0.0	78.33172621484334	0.01276621936375132	0.9994162431836086	63.321767565624114	0.7983429661535255	9	0.06191387559808613	94.72211115553779	2.3440270156184044	2.0974171715749024	1.863897005809633	0.4767768727902246	0.9190271492955504	0.9639515074222933	0.6117369062011452
584	585GLU	584	0.013636363636363636	0.0077138921583987	0.4398240703718513	0.0	1.0	0.0	100.48210780995221	0.009952020531768297	0.9975127579324257	136.44315690579066	0.8977012143390766	9	0.06191387559808613	94.72211115553779	2.3440270156184044	2.0974171715749024	1.863897005809633	0.4767768727902246	0.9190271492955504	0.9639515074222933	0.6117369062011452
1420	1421GLU	1420	0.010869565217391308	0.00407862239984646	0.9596161535385845	0.0	1.0	0.0	100.482148513231	0.009952016500406785	0.9997582214706294	76.40454399436481	0.5989953993901265	9	0.06191387559808613	94.72211115553779	2.3440270156184044	2.0974171715749024	1.863897005809633	0.4767768727902246	0.9190271492955504	0.9639515074222933	0.6117369062011452
1359	1360ILE	1359	0.0136	0.007418894796396563	1.0395841663334666	0.0	1.0	0.0	112.66223556983594	0.008876088734988132	0.9999079173184696	101.26969889322586	0.9996700217375449	9	0.06191387559808613	94.72211115553779	2.3440270156184044	2.0974171715749024	1.863897005809633	0.4767768727902246	0.9190271492955504	0.9639515074222933	0.6117369062011452
582	583LEU	582	0.012622950819672135	0.005978551648790318	2.6789284286285486	0.0	1.0298507462686568	0.0	131.7559198418059	0.0075897917998725235	0.999689933191083	101.16104998449694	0.9994743045452605	9	0.06191387559808613	94.72211115553779	2.3440270156184044	2.0974171715749024	1.863897005809633	0.4767768727902246	0.9190271492955504	0.9639515074222933	0.6117369062011452
1419	1420PRO	1419	0.012197802197802199	0.00487248335766931	3.7984806077568973	0.0	1.0105263157894737	0.0	134.67817591671326	0.007425107989422228	0.9999958658406105	119.91207416624884	0.9999532433869802	9	0.06191387559808613	94.72211115553779	2.3440270156184044	2.0974171715749024	1.863897005809633	0.4767768727902246	0.9190271492955504	0.9639515074222933	0.6117369062011452
581	582SER	581	0.011666666666666665	0.0037267799624996494	0.7596961215513794	0.0	1.0	0.0	135.48870472245918	0.007380689054843668	0.9999062396673124	143.78939023841818	0.9998147414328231	9	0.06191387559808613	94.72211115553779	2.3440270156184044	2.0974171715749024	1.863897005809633	0.4767768727902246	0.9190271492955504	0.9639515074222933	0.6117369062011452
580	581SER	580	0.01	0.0	0.03998400639744103	0.0	1.0	0.0	0.0	0.0	-0.00040016006402532334	0.0	-0.00040016006402532334	9	0.06191387559808613	94.72211115553779	2.3440270156184044	2.0974171715749024	1.863897005809633	0.4767768727902246	0.9190271492955504	0.9639515074222933	0.6117369062011452
587	588GLY	587	0.01	0.0	0.03998400639744103	0.0	1.0	0.0	0.0	0.0	-0.00040016006402532334	0.0	-0.00040016006402532334	9	0.06191387559808613	94.72211115553779	2.3440270156184044	2.0974171715749024	1.863897005809633	0.4767768727902246	0.9190271492955504	0.9639515074222933	0.6117369062011452
1048	1049VAL	1048	0.1075531914893617	0.31036589994958613	20.191923230707715	0.0	1.0376237623762377	0.0	1.1201029938025882	0.8927750443779676	0.930742549652378	2.791964746336431	0.9875820497076317	7	0.08744661095636028	98.36065573770492	3.227642276422764	2.396943665656456	1.5993366319332578	0.41719795685149236	0.960663302230316	0.9744710139449675	0.6056252087329341
1052	1053PHE	1052	0.07158940397350995	0.1407285962861459	69.41223510595762	0.0	1.3692396313364055	0.0	2.1463726423931617	0.46590232294659717	0.9985063498807302	2.955705009838758	0.9976316772587218	7	0.08744661095636028	98.36065573770492	3.227642276422764	2.396943665656456	1.5993366319332578	0.41719795685149236	0.960663302230316	0.9744710139449675	0.6056252087329341
1281	1282ILE	1281	0.11096774193548388	0.26421343814216025	7.477009196321472	0.0	1.0	0.0	2.234497092835145	0.4475279933039399	0.9935662262115204	4.106547694605842	0.9902530447480895	7	0.08744661095636028	98.36065573770492	3.227642276422764	2.396943665656456	1.5993366319332578	0.41719795685149236	0.960663302230316	0.9744710139449675	0.6056252087329341
397	398ILE	397	0.06966183574879228	0.12755743858236113	30.5077968812475	0.0	1.056356487549148	0.0	3.009252343795139	0.33230845597310166	0.9983560787556653	4.134441546538645	0.9982001574491421	7	0.08744661095636028	98.36065573770492	3.227642276422764	2.396943665656456	1.5993366319332578	0.41719795685149236	0.960663302230316	0.9744710139449675	0.6056252087329341
1282	1283ASN	1282	0.1725	0.21088355791763377	44.46221511395442	0.0	1.0962230215827338	0.0	3.0370119615630196	0.3292710113283001	0.9986454804882584	3.0404895176598226	0.998330507007146	7	0.08744661095636028	98.36065573770492	3.227642276422764	2.396943665656456	1.5993366319332578	0.41719795685149236	0.960663302230316	0.9744710139449675	0.6056252087329341
1285	1286ILE	1285	0.12348837209302324	0.23418223594507256	49.70011995201919	0.0	1.0997586484312147	0.0	3.1763281497525675	0.3148289322933775	0.9966663501895293	2.9744559184878776	0.9960184455984742	7	0.08744661095636028	98.36065573770492	3.227642276422764	2.396943665656456	1.5993366319332578	0.41719795685149236	0.960663302230316	0.9744710139449675	0.6056252087329341
1283	1284LYS	1283	0.10806451612903226	0.20747288840207165	62.85485805677729	0.0	1.2315521628498727	0.0	3.2468550783293106	0.30799034015234095	0.9862558363204057	2.9576971424992378	0.9949206114235206	7	0.08744661095636028	98.36065573770492	3.227642276422764	2.396943665656456	1.5993366319332578	0.41719795685149236	0.960663302230316	0.9744710139449675	0.6056252087329341
1284	1285PHE	1284	0.09142857142857141	0.15535016404686464	3.9984006397441023	0.0	1.0	0.0	3.337555055564978	0.2996205256097928	0.9939496268696505	8.074433790211978	0.9959607247780559	7	0.08744661095636028	98.36065573770492	3.227642276422764	2.396943665656456	1.5993366319332578	0.41719795685149236	0.960663302230316	0.9744710139449675	0.6056252087329341
1049	1050GLU	1049	0.06281553398058252	0.12092617884300005	27.189124350259895	0.0	1.035294117647059	0.0	5.031982847789619	0.19872881729699582	0.9996195261316814	4.455487980988522	0.9950649101656014	7	0.08744661095636028	98.36065573770492	3.227642276422764	2.396943665656456	1.5993366319332578	0.41719795685149236	0.960663302230316	0.9744710139449675	0.6056252087329341
1050	1051GLU	1050	0.08044776119402985	0.11629777574933013	18.512594962015193	0.0	1.0237580993520519	0.0	6.403407171139956	0.1561668613713934	0.9990175222417823	6.208740636302123	0.9985465328204152	7	0.08744661095636028	98.36065573770492	3.227642276422764	2.396943665656456	1.5993366319332578	0.41719795685149236	0.960663302230316	0.9744710139449675	0.6056252087329341
1286	1287SER	1286	0.08390334572490707	0.09772127663421994	43.38264694122351	0.0	1.1133640552995392	0.0	6.975169617883618	0.14336568926382848	0.9999100379366199	7.17970368754559	0.9997336637213736	7	0.08744661095636028	98.36065573770492	3.227642276422764	2.396943665656456	1.5993366319332578	0.41719795685149236	0.960663302230316	0.9744710139449675	0.6056252087329341
1053	1054PHE	1053	0.042125340599455045	0.07488123629180887	63.9344262295082	0.0	1.3846153846153846	0.0	8.670094521239145	0.11533899631085894	0.9995507011160616	9.101821276806405	0.9979657974379375	7	0.08744661095636028	98.36065573770492	3.227642276422764	2.396943665656456	1.5993366319332578	0.41719795685149236	0.960663302230316	0.9744710139449675	0.6056252087329341
404	405PHE	404	0.038940998487140686	0.06697549283021532	56.81727309076369	0.0	1.2610837438423645	0.0	9.047584830149056	0.11052673379394282	0.9998912311837943	10.30582908432033	0.9957662122601582	7	0.08744661095636028	98.36065573770492	3.227642276422764	2.396943665656456	1.5993366319332578	0.41719795685149236	0.960663302230316	0.9744710139449675	0.6056252087329341
1051	1052SER	1051	0.06217821782178218	0.08920000844021672	25.949620151939225	0.0	1.0400616332819723	0.0	9.556929007130046	0.10463612309497534	0.9932539411477909	7.163645848323979	0.9978786778894058	7	0.08744661095636028	98.36065573770492	3.227642276422764	2.396943665656456	1.5993366319332578	0.41719795685149236	0.960663302230316	0.9744710139449675	0.6056252087329341
400	401LEU	400	0.04600877192982456	0.0682156019111895	42.1031587365054	0.0	1.1623931623931625	0.0	10.152326688560146	0.09849958838763738	0.9997283619706994	10.267286194447374	0.9995805087737079	7	0.08744661095636028	98.36065573770492	3.227642276422764	2.396943665656456	1.5993366319332578	0.41719795685149236	0.960663302230316	0.9744710139449675	0.6056252087329341
1210	1211ILE	1210	0.023333333333333334	0.025603819159562027	0.2798880447820872	0.0	1.0	0.0	10.187115516059533	0.09816321395625137	0.9853328608953499	18.560921762903362	0.6900576208232846	7	0.08744661095636028	98.36065573770492	3.227642276422764	2.396943665656456	1.5993366319332578	0.41719795685149236	0.960663302230316	0.9744710139449675	0.6056252087329341
1277	1278PHE	1277	0.04887323943661972	0.06266337221594333	52.25909636145542	0.0	1.215761285386381	0.0	11.750715422697128	0.08510120141863423	0.9999053133073745	11.82580435920153	0.9988342297527064	7	0.08744661095636028	98.36065573770492	3.227642276422764	2.396943665656456	1.5993366319332578	0.41719795685149236	0.960663302230316	0.9744710139449675	0.6056252087329341
1289	1290LEU	1289	0.0537712895377129	0.059948365885176796	45.821671331467414	0.0	1.1396160558464223	0.0	13.386090173253356	0.07470441234574172	0.9998768997354112	12.250279007404652	0.9997928224431849	7	0.08744661095636028	98.36065573770492	3.227642276422764	2.396943665656456	1.5993366319332578	0.41719795685149236	0.960663302230316	0.9744710139449675	0.6056252087329341
398	399ILE	398	0.022	0.019390719429665314	0.19992003198720512	0.0	1.0	0.0	15.196724078251295	0.06580365576493846	0.9925913842048436	40.34521824163441	0.9928521264674455	7	0.08744661095636028	98.36065573770492	3.227642276422764	2.396943665656456	1.5993366319332578	0.41719795685149236	0.960663302230316	0.9744710139449675	0.6056252087329341
394	395LEU	394	0.03684210526315789	0.03839581002071468	0.9996001599360256	0.0	1.0	0.0	16.054671683306616	0.0622871659866943	0.9958418069636322	16.99210897448178	0.9950702818015673	7	0.08744661095636028	98.36065573770492	3.227642276422764	2.396943665656456	1.5993366319332578	0.41719795685149236	0.960663302230316	0.9744710139449675	0.6056252087329341
401	402ILE	401	0.049467680608365025	0.05494987260388471	27.309076369452217	0.0	1.0307467057101025	0.0	16.222824193389798	0.06164154823347362	0.999768922776023	13.521083863537319	0.9992807579955334	7	0.08744661095636028	98.36065573770492	3.227642276422764	2.396943665656456	1.5993366319332578	0.41719795685149236	0.960663302230316	0.9744710139449675	0.6056252087329341
1214	1215PHE	1214	0.029292307692307697	0.03281356336682138	24.270291883246703	0.0	1.013179571663921	0.0	21.945617017778627	0.04556718542886618	0.9998653984281624	21.14121755786711	0.9997333872356281	7	0.08744661095636028	98.36065573770492	3.227642276422764	2.396943665656456	1.5993366319332578	0.41719795685149236	0.960663302230316	0.9744710139449675	0.6056252087329341
405	406MET	405	0.03357142857142857	0.03545381205336947	21.631347461015594	0.0	1.022181146025878	0.0	22.571425140204074	0.04430380420325372	0.9999426873289287	24.19435526561354	0.9994200484289317	7	0.08744661095636028	98.36065573770492	3.227642276422764	2.396943665656456	1.5993366319332578	0.41719795685149236	0.960663302230316	0.9744710139449675	0.6056252087329341
1275	1276HIS	1275	0.02936170212765958	0.030415859197461162	2.9588164734106357	0.0	1.0675675675675675	0.0	23.25940111917196	0.042993368353570066	0.9994947173500504	27.6806227730145	0.9983056008649154	7	0.08744661095636028	98.36065573770492	3.227642276422764	2.396943665656456	1.5993366319332578	0.41719795685149236	0.960663302230316	0.9744710139449675	0.6056252087329341
1292	1293LEU	1292	0.025	0.024823209096419416	22.63094762095162	0.0	1.0441696113074206	0.0	29.060522541961806	0.03441094352505378	0.9997724956860049	31.27087962807177	0.9985477646905265	7	0.08744661095636028	98.36065573770492	3.227642276422764	2.396943665656456	1.5993366319332578	0.41719795685149236	0.960663302230316	0.9744710139449675	0.6056252087329341
1280	1281ASN	1280	0.026428571428571426	0.026260728290360417	1.9992003198720512	0.0	1.0	0.0	29.89079405797076	0.0334551165840754	0.9993592333360307	26.301630998244224	0.9979813877929784	7	0.08744661095636028	98.36065573770492	3.227642276422764	2.396943665656456	1.5993366319332578	0.41719795685149236	0.960663302230316	0.9744710139449675	0.6056252087329341
408	409ILE	408	0.017679738562091502	0.01396220556521697	14.394242303078768	0.0	1.038888888888889	0.0	32.037050352628285	0.03121385985891679	0.9998939174824858	34.23575841833394	0.9997907183586852	7	0.08744661095636028	98.36065573770492	3.227642276422764	2.396943665656456	1.5993366319332578	0.41719795685149236	0.960663302230316	0.9744710139449675	0.6056252087329341
1276	1277ASN	1276	0.028692810457516343	0.025659734496955917	9.876049580167933	0.0	1.008097165991903	0.0	36.64778304743508	0.02728678017727974	0.9997033294178636	27.88432024604475	0.9994567449640493	7	0.08744661095636028	98.36065573770492	3.227642276422764	2.396943665656456	1.5993366319332578	0.41719795685149236	0.960663302230316	0.9744710139449675	0.6056252087329341
1288	1289VAL	1288	0.028757763975155278	0.02458999857224074	8.876449420231907	0.0	1.0	0.0	38.8664161913087	0.025729153804091145	0.9997595777510372	22.425488576269423	0.9993362350961019	7	0.08744661095636028	98.36065573770492	3.227642276422764	2.396943665656456	1.5993366319332578	0.41719795685149236	0.960663302230316	0.9744710139449675	0.6056252087329341
407	408ILE	407	0.015279503105590059	0.008637784380716754	14.194322271091563	0.0	1.0338028169014084	0.0	46.336061182675635	0.021581463216253805	0.9999711951673225	61.99560667278231	0.9999372681284356	7	0.08744661095636028	98.36065573770492	3.227642276422764	2.396943665656456	1.5993366319332578	0.41719795685149236	0.960663302230316	0.9744710139449675	0.6056252087329341
1217	1218PHE	1217	0.021530054644808744	0.018755193772383074	10.195921631347462	0.0	1.003921568627451	0.0	47.07034023405489	0.02124480076046934	0.9998564657568558	44.10322697207626	0.9996974453746199	7	0.08744661095636028	98.36065573770492	3.227642276422764	2.396943665656456	1.5993366319332578	0.41719795685149236	0.960663302230316	0.9744710139449675	0.6056252087329341
1213	1214ILE	1213	0.02	0.0	0.03998400639744103	0.0	1.0	0.0	59.89496507342637	0.016695894200356925	0.9763873287863242	59.89496507342638	0.9763873287863241	7	0.08744661095636028	98.36065573770492	3.227642276422764	2.396943665656456	1.5993366319332578	0.41719795685149236	0.960663302230316	0.9744710139449675	0.6056252087329341
456	457PHE	456	0.015555555555555557	0.00831479419283098	0.9996001599360256	0.0	1.0	0.0	71.99952522155196	0.013888980474841592	0.9985867495014353	89.44743438618923	0.9991151185152966	7	0.08744661095636028	98.36065573770492	3.227642276422764	2.396943665656456	1.5993366319332578	0.41719795685149236	0.960663302230316	0.9744710139449675	0.6056252087329341
1274	1275ILE	1274	0.014444444444444446	0.0087488976377909	1.2794882047181129	0.0	1.03125	0.0	94.0856228787211	0.010628616460232472	0.9995722966489523	76.16218468779961	0.9994632305148695	7	0.08744661095636028	98.36065573770492	3.227642276422764	2.396943665656456	1.5993366319332578	0.41719795685149236	0.960663302230316	0.9744710139449675	0.6056252087329341
505	506LYS	505	0.01	0.0	0.03998400639744103	0.0	1.0	0.0	0.0	0.0	-0.00040016006402532334	0.0	-0.00040016006402532334	7	0.08744661095636028	98.36065573770492	3.227642276422764	2.396943665656456	1.5993366319332578	0.41719795685149236	0.960663302230316	0.9744710139449675	0.6056252087329341
1272	1273LEU	1272	0.01	0.0	0.11995201919232307	0.0	1.0	0.0	0.0	0.0	-0.00040016006402532334	0.0	-0.00040016006402532334	7	0.08744661095636028	98.36065573770492	3.227642276422764	2.396943665656456	1.5993366319332578	0.41719795685149236	0.960663302230316	0.9744710139449675	0.6056252087329341
1059	1060ARG	1059	0.08768000000000001	0.12397721941281527	71.77129148340664	0.0	1.346518105849582	0.0	4.5363420002398565	0.22044193315828603	0.9998494444247572	4.535809855220548	0.9995148500849671	10	0.09185798816568048	97.80087964814075	2.8237939493049877	3.9685556976882275	3.7219535802931616	0.2519808404308203	0.9997323982715184	0.9987819503707153	0.4079472469208843
1042	1043ASN	1042	0.07106145251396648	0.10792865230767804	24.71011595361855	0.0	1.0453074433656957	0.0	5.255629049838417	0.19027218064995374	0.999462536052059	5.1970206932796135	0.999126486466737	10	0.09185798816568048	97.80087964814075	2.8237939493049877	3.9685556976882275	3.7219535802931616	0.2519808404308203	0.9997323982715184	0.9987819503707153	0.4079472469208843
1055	1056LYS	1055	0.09066079295154186	0.1160016876881875	48.42063174730108	0.0	1.0982658959537572	0.0	5.654846459926399	0.17683946099802955	0.9995229998536076	6.201417110150339	0.9991979256540382	10	0.09185798816568048	97.80087964814075	2.8237939493049877	3.9685556976882275	3.7219535802931616	0.2519808404308203	0.9997323982715184	0.9987819503707153	0.4079472469208843
1038	1039LEU	1038	0.016666666666666666	0.011268723396380222	0.9996001599360256	0.0	1.0	0.0	8.362065261878287	0.11958768183248787	0.9989409789505603	52.8089744209669	0.9988974267836557	10	0.09185798816568048	97.80087964814075	2.8237939493049877	3.9685556976882275	3.7219535802931616	0.2519808404308203	0.9997323982715184	0.9987819503707153	0.4079472469208843
1054	1055GLN	1054	0.09091743119266055	0.07931520307780085	20.591763294682128	0.0	1.0155339805825243	0.0	9.65829259011532	0.10353796912545803	0.9992071816112383	8.84877039416006	0.9988215562601186	10	0.09185798816568048	97.80087964814075	2.8237939493049877	3.9685556976882275	3.7219535802931616	0.2519808404308203	0.9997323982715184	0.9987819503707153	0.4079472469208843
1043	1044PHE	1043	0.0901123595505618	0.08781357144762748	11.435425829668132	0.0	1.0034965034965035	0.0	10.237508275038106	0.09768001872470064	0.9991192381151627	8.334648115777004	0.9986367327090464	10	0.09185798816568048	97.80087964814075	2.8237939493049877	3.9685556976882275	3.7219535802931616	0.2519808404308203	0.9997323982715184	0.9987819503707153	0.4079472469208843
1060	1061LYS	1060	0.0529610829103215	0.06973867227736737	71.17153138744503	0.0	1.3404494382022472	0.0	11.596199963149866	0.0862351462701382	0.9999442772871697	11.489422861566448	0.9997648787614708	10	0.09185798816568048	97.80087964814075	2.8237939493049877	3.9685556976882275	3.7219535802931616	0.2519808404308203	0.9997323982715184	0.9987819503707153	0.4079472469208843
1041	1042PHE	1041	0.05220833333333333	0.06946610634370949	31.867253098760496	0.0	1.0915934755332497	0.0	11.653311813236183	0.0858125154485414	0.999751789625141	9.914395496206511	0.9992457723292668	10	0.09185798816568048	97.80087964814075	2.8237939493049877	3.9685556976882275	3.7219535802931616	0.2519808404308203	0.9997323982715184	0.9987819503707153	0.4079472469208843
1064	1065THR	1064	0.05192139737991266	0.0675120751014973	24.71011595361855	0.0	1.0307443365695792	0.0	12.137888163195361	0.08238665462680823	0.9989993108531329	9.076618025442178	0.9981716559688383	10	0.09185798816568048	97.80087964814075	2.8237939493049877	3.9685556976882275	3.7219535802931616	0.2519808404308203	0.9997323982715184	0.9987819503707153	0.4079472469208843
1056	1057VAL	1056	0.03845288326300984	0.0542938062790431	59.97600959616153	0.0	1.2346666666666666	0.0	12.864379923039317	0.07773402262545598	0.9998640212477715	12.981673979688205	0.9997339998028781	10	0.09185798816568048	97.80087964814075	2.8237939493049877	3.9685556976882275	3.7219535802931616	0.2519808404308203	0.9997323982715184	0.9987819503707153	0.4079472469208843
1057	1058ILE	1057	0.03239242685025818	0.0449320490343707	40.503798480607756	0.0	1.15893385982231	0.0	14.65170900343859	0.0682514237598707	0.9999292071916079	15.828850502261611	0.9979846207574568	10	0.09185798816568048	97.80087964814075	2.8237939493049877	3.9685556976882275	3.7219535802931616	0.2519808404308203	0.9997323982715184	0.9987819503707153	0.4079472469208843
1062	1063LYS	1062	0.042091254752851706	0.04915444001257984	49.50019992003199	0.0	1.184168012924071	0.0	15.19839311174576	0.0657964294414237	0.9999570233581853	16.367442902998587	0.9986990717674702	10	0.09185798816568048	97.80087964814075	2.8237939493049877	3.9685556976882275	3.7219535802931616	0.2519808404308203	0.9997323982715184	0.9987819503707153	0.4079472469208843
1063	1064SER	1063	0.0445945945945946	0.05400173143343294	37.18512594962015	0.0	1.0526881720430108	0.0	16.4021818082154	0.06096749881769556	0.9999256484435742	14.39614309280662	0.9995891663953396	10	0.09185798816568048	97.80087964814075	2.8237939493049877	3.9685556976882275	3.7219535802931616	0.2519808404308203	0.9997323982715184	0.9987819503707153	0.4079472469208843
1133	1134ARG	1133	0.028441558441558448	0.037901613407214756	5.237904838064774	0.0	1.015267175572519	0.0	16.486970037200045	0.060653958716712045	0.999069919106204	19.06913689294678	0.9949316330887072	10	0.09185798816568048	97.80087964814075	2.8237939493049877	3.9685556976882275	3.7219535802931616	0.2519808404308203	0.9997323982715184	0.9987819503707153	0.4079472469208843
1061	1062TYR	1061	0.03428835489833641	0.038695240758620145	45.021991203518596	0.0	1.189165186500888	0.0	16.567074536646	0.060360686963049644	0.9999082419044056	17.866189675754164	0.9994200388937978	10	0.09185798816568048	97.80087964814075	2.8237939493049877	3.9685556976882275	3.7219535802931616	0.2519808404308203	0.9997323982715184	0.9987819503707153	0.4079472469208843
1065	1066ASP	1065	0.0384272997032641	0.047422167025024775	25.669732107157138	0.0	1.0669781931464175	0.0	16.69819761055991	0.05988670294377172	0.9998666078811224	15.79905461489309	0.9996022345124753	10	0.09185798816568048	97.80087964814075	2.8237939493049877	3.9685556976882275	3.7219535802931616	0.2519808404308203	0.9997323982715184	0.9987819503707153	0.4079472469208843
1035	1036SER	1035	0.048253968253968264	0.052115247214126005	26.749300279888043	0.0	1.0373692077727952	0.0	17.482055537996665	0.05720151144849834	0.9997550526264425	11.820280173404091	0.9991642081369372	10	0.09185798816568048	97.80087964814075	2.8237939493049877	3.9685556976882275	3.7219535802931616	0.2519808404308203	0.9997323982715184	0.9987819503707153	0.4079472469208843
1058	1059SER	1058	0.040540540540540536	0.043616631215933385	3.278688524590164	0.0	1.0	0.0	19.906215231742213	0.05023556654835179	0.9991852825889691	18.53648432966524	0.998890518231533	10	0.09185798816568048	97.80087964814075	2.8237939493049877	3.9685556976882275	3.7219535802931616	0.2519808404308203	0.9997323982715184	0.9987819503707153	0.4079472469208843
1066	1067SER	1066	0.02764705882352941	0.024139158269039045	1.9992003198720512	0.0	1.0	0.0	20.233097391731935	0.0494239700743318	0.9984352893641877	24.691328183093088	0.9973992327684977	10	0.09185798816568048	97.80087964814075	2.8237939493049877	3.9685556976882275	3.7219535802931616	0.2519808404308203	0.9997323982715184	0.9987819503707153	0.4079472469208843
1037	1038ASN	1037	0.035757575757575766	0.03794176582768716	5.47780887644942	0.0	1.0218978102189782	0.0	23.877217364549285	0.04188092710856286	0.9996974249968893	14.621931578071166	0.998391552042303	10	0.09185798816568048	97.80087964814075	2.8237939493049877	3.9685556976882275	3.7219535802931616	0.2519808404308203	0.9997323982715184	0.9987819503707153	0.4079472469208843
1136	1137ARG	1136	0.023200000000000002	0.018701871564097538	1.3594562175129947	0.0	1.0	0.0	27.422773024242918	0.0364660422604219	0.9979348229635769	40.76929052249626	0.9983298359861195	10	0.09185798816568048	97.80087964814075	2.8237939493049877	3.9685556976882275	3.7219535802931616	0.2519808404308203	0.9997323982715184	0.9987819503707153	0.4079472469208843
1034	1035LYS	1034	0.02570175438596491	0.02465442909732676	13.434626149540184	0.0	1.0238095238095237	0.0	27.464584730833927	0.036410526858515375	0.9999676467654504	31.383950735322884	0.9998964757924677	10	0.09185798816568048	97.80087964814075	2.8237939493049877	3.9685556976882275	3.7219535802931616	0.2519808404308203	0.9997323982715184	0.9987819503707153	0.4079472469208843
1067	1068LEU	1067	0.014849999999999999	0.01330328906699392	8.95641743302679	0.0	1.03125	0.0	33.01291549425914	0.030291174984950885	0.999963945097035	39.09735243206486	0.9998226438789517	10	0.09185798816568048	97.80087964814075	2.8237939493049877	3.9685556976882275	3.7219535802931616	0.2519808404308203	0.9997323982715184	0.9987819503707153	0.4079472469208843
1033	1034GLU	1033	0.014210526315789477	0.008775437895017403	3.438624550179928	0.0	1.0116279069767442	0.0	64.64984797849031	0.015467940471147133	0.9999056995276044	73.53168327365351	0.9998644532165365	10	0.09185798816568048	97.80087964814075	2.8237939493049877	3.9685556976882275	3.7219535802931616	0.2519808404308203	0.9997323982715184	0.9987819503707153	0.4079472469208843
1040	1041HIS	1040	0.018064516129032263	0.01220418265301837	5.037984806077569	0.0	1.0	0.0	72.299019940688	0.01383144613606617	0.9997844566421122	61.137819120554965	0.9995761359405428	10	0.09185798816568048	97.80087964814075	2.8237939493049877	3.9685556976882275	3.7219535802931616	0.2519808404308203	0.9997323982715184	0.9987819503707153	0.4079472469208843
1134	1135LEU	1134	0.015384615384615389	0.008426500884694862	1.839264294282287	0.0	1.0	0.0	80.37249390118866	0.012442067571393484	0.9999523897614113	63.35275080920759	0.9993884217358344	10	0.09185798816568048	97.80087964814075	2.8237939493049877	3.9685556976882275	3.7219535802931616	0.2519808404308203	0.9997323982715184	0.9987819503707153	0.4079472469208843
1039	1040LEU	1039	0.013913043478260867	0.006419488287058	0.9596161535385845	0.0	1.0	0.0	92.08252860881196	0.010859823411759608	0.9998971697644248	110.36138298878234	0.999279321844897	10	0.09185798816568048	97.80087964814075	2.8237939493049877	3.9685556976882275	3.7219535802931616	0.2519808404308203	0.9997323982715184	0.9987819503707153	0.4079472469208843
1105	1106PHE	1105	0.012222222222222223	0.00415739709641549	0.3598560575769692	0.0	1.0	0.0	116.58823633058815	0.008577194676523634	0.9996712400675939	113.22448945626157	0.8993990294775275	10	0.09185798816568048	97.80087964814075	2.8237939493049877	3.9685556976882275	3.7219535802931616	0.2519808404308203	0.9997323982715184	0.9987819503707153	0.4079472469208843
1102	1103ARG	1102	0.011666666666666665	0.0037267799624996494	0.7197121151539384	0.0	1.0	0.0	135.48870472245918	0.007380689054843668	0.9999062396673124	108.56272237449653	0.899556833989428	10	0.09185798816568048	97.80087964814075	2.8237939493049877	3.9685556976882275	3.7219535802931616	0.2519808404308203	0.9997323982715184	0.9987819503707153	0.4079472469208843
1036	1037LEU	1036	0.011111111111111112	0.0031426968052735444	0.3598560575769692	0.0	1.0	0.0	166.21877841595935	0.006016167424221582	0.9999868071054127	89.80098905993172	0.599768906825865	10	0.09185798816568048	97.80087964814075	2.8237939493049877	3.9685556976882275	3.7219535802931616	0.2519808404308203	0.9997323982715184	0.9987819503707153	0.4079472469208843
1032	1033ILE	1032	0.01	0.0	0.03998400639744103	0.0	1.0	0.0	0.0	0.0	-0.00040016006402532334	0.0	-0.00040016006402532334	10	0.09185798816568048	97.80087964814075	2.8237939493049877	3.9685556976882275	3.7219535802931616	0.2519808404308203	0.9997323982715184	0.9987819503707153	0.4079472469208843
1068	1069ALA	1068	0.01	0.0	0.1599360255897641	0.0	1.0	0.0	0.0	0.0	-0.00040016006402532334	0.0	-0.00040016006402532334	10	0.09185798816568048	97.80087964814075	2.8237939493049877	3.9685556976882275	3.7219535802931616	0.2519808404308203	0.9997323982715184	0.9987819503707153	0.4079472469208843
1098	1099LYS	1098	0.01	0.0	0.07996801279488205	0.0	1.0	0.0	0.0	0.0	-0.00040016006402532334	0.0	-0.00040016006402532334	10	0.09185798816568048	97.80087964814075	2.8237939493049877	3.9685556976882275	3.7219535802931616	0.2519808404308203	0.9997323982715184	0.9987819503707153	0.4079472469208843
1389	1390SER	1389	0.095	0.13621149521450615	6.717313074770092	0.0	1.0	0.0	1.6487688119120256	0.6065131707824648	0.996614754081882	4.1202318981165735	0.9938483735638861	13	0.027667731629392973	27.948820471811274	1.1044349070100143	4.620600321688933	5.162649201767975	0.21642209461528963	0.9973310740613708	0.9833420095968544	0.7318302087190666
1391	1392ARG	1391	0.13703703703703704	0.1543400482056091	10.475809676129549	0.0	1.0	0.0	5.3582869086612375	0.18662681133844866	0.9972077279416455	4.5009763411498565	0.9974158547400356	13	0.027667731629392973	27.948820471811274	1.1044349070100143	4.620600321688933	5.162649201767975	0.21642209461528963	0.9973310740613708	0.9833420095968544	0.7318302087190666
1390	1391LEU	1390	0.03347826086956522	0.06140448189648232	10.915633746501399	0.0	1.043956043956044	0.0	9.904184043259445	0.10096742908170982	0.9997436661126561	8.622511577439786	0.9954965133884388	13	0.027667731629392973	27.948820471811274	1.1044349070100143	4.620600321688933	5.162649201767975	0.21642209461528963	0.9973310740613708	0.9833420095968544	0.7318302087190666
1315	1316THR	1315	0.0478	0.06325472314380957	5.037984806077569	0.0	1.0	0.0	11.20205898872623	0.08926930317064047	0.9980226577875575	11.342772977619408	0.9965192349865962	13	0.027667731629392973	27.948820471811274	1.1044349070100143	4.620600321688933	5.162649201767975	0.21642209461528963	0.9973310740613708	0.9833420095968544	0.7318302087190666
1385	1386LEU	1385	0.021764705882352943	0.021393226191350364	3.198720511795282	0.0	1.0	0.0	17.827881604808848	0.05609191390020576	0.9986787277379755	33.56140381574826	0.9965967756298226	13	0.027667731629392973	27.948820471811274	1.1044349070100143	4.620600321688933	5.162649201767975	0.21642209461528963	0.9973310740613708	0.9833420095968544	0.7318302087190666
1311	1312ILE	1311	0.038636363636363635	0.033884221930977974	2.199120351859256	0.0	1.0	0.0	21.03981021419287	0.04752894583266858	0.9997165933651517	27.777018569184765	0.9985563018603644	13	0.027667731629392973	27.948820471811274	1.1044349070100143	4.620600321688933	5.162649201767975	0.21642209461528963	0.9973310740613708	0.9833420095968544	0.7318302087190666
1388	1389THR	1388	0.05708333333333334	0.06048272251000464	7.477009196321472	0.0	1.0053475935828877	0.0	21.42364361758919	0.04667740081238947	0.9990592577125491	10.858973782047608	0.9984739452438556	13	0.027667731629392973	27.948820471811274	1.1044349070100143	4.620600321688933	5.162649201767975	0.21642209461528963	0.9973310740613708	0.9833420095968544	0.7318302087190666
1386	1387LEU	1386	0.016666666666666666	0.0107496769977314	1.4794082367053178	0.0	1.0	0.0	26.008423408194837	0.03844908183419207	0.9983820622125142	49.18702672158066	0.9981983958096246	13	0.027667731629392973	27.948820471811274	1.1044349070100143	4.620600321688933	5.162649201767975	0.21642209461528963	0.9973310740613708	0.9833420095968544	0.7318302087190666
1314	1315SER	1314	0.026578947368421053	0.02904409676314111	2.6389444222311074	0.0	1.0	0.0	27.142491163751675	0.0368426020281986	0.9988233143946649	25.809398855122417	0.9957507237873188	13	0.027667731629392973	27.948820471811274	1.1044349070100143	4.620600321688933	5.162649201767975	0.21642209461528963	0.9973310740613708	0.9833420095968544	0.7318302087190666
1394	1395LEU	1394	0.02095588235294118	0.023068908171420974	8.15673730507797	0.0	1.0196078431372548	0.0	29.880603582307593	0.033466526111008796	0.9994973675878414	39.09634939736832	0.9966272385505818	13	0.027667731629392973	27.948820471811274	1.1044349070100143	4.620600321688933	5.162649201767975	0.21642209461528963	0.9973310740613708	0.9833420095968544	0.7318302087190666
1392	1393PHE	1392	0.04	0.0	0.03998400639744103	0.0	1.0	0.0	30.03795556016311	0.033291213777751856	0.9767096661971979	30.037955560163105	0.976709666197198	13	0.027667731629392973	27.948820471811274	1.1044349070100143	4.620600321688933	5.162649201767975	0.21642209461528963	0.9973310740613708	0.9833420095968544	0.7318302087190666
1384	1385THR	1384	0.021724137931034483	0.020353592501205112	1.639344262295082	0.0	1.0	0.0	34.67659670537739	0.028837893421211295	0.9981168519741188	32.837194427224915	0.9977778331348534	13	0.027667731629392973	27.948820471811274	1.1044349070100143	4.620600321688933	5.162649201767975	0.21642209461528963	0.9973310740613708	0.9833420095968544	0.7318302087190666
1316	1317GLY	1316	0.02068965517241379	0.016385661200712724	1.2794882047181129	0.0	1.0	0.0	54.002160063404105	0.018517777785664442	0.9993255755923557	39.31928916924918	0.9981696210705092	13	0.027667731629392973	27.948820471811274	1.1044349070100143	4.620600321688933	5.162649201767975	0.21642209461528963	0.9973310740613708	0.9833420095968544	0.7318302087190666
1387	1388ALA	1387	0.018240740740740745	0.014454827702042927	5.957616953218713	0.0	1.0	0.0	59.876006823594935	0.016701180540415344	0.9998147959946799	53.523675544290064	0.9995853280298306	13	0.027667731629392973	27.948820471811274	1.1044349070100143	4.620600321688933	5.162649201767975	0.21642209461528963	0.9973310740613708	0.9833420095968544	0.7318302087190666
1326	1327CYS	1326	0.02	0.0	0.03998400639744103	0.0	1.0	0.0	59.89496507342637	0.016695894200356925	0.9763873287863242	59.89496507342638	0.9763873287863241	13	0.027667731629392973	27.948820471811274	1.1044349070100143	4.620600321688933	5.162649201767975	0.21642209461528963	0.9973310740613708	0.9833420095968544	0.7318302087190666
1380	1381LEU	1380	0.013750000000000002	0.009921567416492215	0.4398240703718513	0.0	1.0	0.0	65.96745626103029	0.015158989851648128	0.9966993931242696	32.760427058520754	0.5970290366576372	13	0.027667731629392973	27.948820471811274	1.1044349070100143	4.620600321688933	5.162649201767975	0.21642209461528963	0.9973310740613708	0.9833420095968544	0.7318302087190666
1363	1364ILE	1363	0.01710144927536232	0.012170461898676531	3.318672530987605	0.0	1.036144578313253	0.0	72.25894554316271	0.013839116976910024	0.9998124247862854	56.782269557787984	0.9994816358062962	13	0.027667731629392973	27.948820471811274	1.1044349070100143	4.620600321688933	5.162649201767975	0.21642209461528963	0.9973310740613708	0.9833420095968544	0.7318302087190666
1383	1384ALA	1383	0.015	0.005	0.1599360255897641	0.0	1.0	0.0	78.05103835872583	0.012812129358279108	0.9946937684248531	59.56983315766355	0.7907730136463875	13	0.027667731629392973	27.948820471811274	1.1044349070100143	4.620600321688933	5.162649201767975	0.21642209461528963	0.9973310740613708	0.9833420095968544	0.7318302087190666
1366	1367ALA	1366	0.015000000000000003	0.006708203932499369	0.47980807676929227	0.0	1.0	0.0	78.20164397520325	0.012787454958326545	0.9992733698968508	65.11249614385858	0.9957741340578459	13	0.027667731629392973	27.948820471811274	1.1044349070100143	4.620600321688933	5.162649201767975	0.21642209461528963	0.9973310740613708	0.9833420095968544	0.7318302087190666
1327	1328VAL	1327	0.0125	0.004330127018922193	0.1599360255897641	0.0	1.0	0.0	109.61878658451234	0.009122523895382059	0.9994710699157849	70.41113552237681	0.6985542386296725	13	0.027667731629392973	27.948820471811274	1.1044349070100143	4.620600321688933	5.162649201767975	0.21642209461528963	0.9973310740613708	0.9833420095968544	0.7318302087190666
1330	1331LEU	1330	0.012	0.004	0.39984006397441024	0.0	1.0	0.0	123.22643475050604	0.008115141868907258	0.9997892498032755	137.8538938253701	0.9995299516413348	13	0.027667731629392973	27.948820471811274	1.1044349070100143	4.620600321688933	5.162649201767975	0.21642209461528963	0.9973310740613708	0.9833420095968544	0.7318302087190666
1367	1368ILE	1367	0.01310344827586207	0.006487892318009234	2.4390243902439024	0.0	1.0	0.0	132.73338815252475	0.007533899450007965	0.9999603478788923	118.03516407628756	0.9998144098937389	13	0.027667731629392973	27.948820471811274	1.1044349070100143	4.620600321688933	5.162649201767975	0.21642209461528963	0.9973310740613708	0.9833420095968544	0.7318302087190666
1312	1313PRO	1312	0.01	0.0	0.07996801279488205	0.0	1.0	0.0	0.0	0.0	-0.00040016006402532334	0.0	-0.00040016006402532334	13	0.027667731629392973	27.948820471811274	1.1044349070100143	4.620600321688933	5.162649201767975	0.21642209461528963	0.9973310740613708	0.9833420095968544	0.7318302087190666
1317	1318GLU	1317	0.01	0.0	0.03998400639744103	0.0	1.0	0.0	0.0	0.0	-0.00040016006402532334	0.0	-0.00040016006402532334	13	0.027667731629392973	27.948820471811274	1.1044349070100143	4.620600321688933	5.162649201767975	0.21642209461528963	0.9973310740613708	0.9833420095968544	0.7318302087190666
1331	1332LEU	1331	0.01	0.0	0.03998400639744103	0.0	1.0	0.0	0.0	0.0	-0.00040016006402532334	0.0	-0.00040016006402532334	13	0.027667731629392973	27.948820471811274	1.1044349070100143	4.620600321688933	5.162649201767975	0.21642209461528963	0.9973310740613708	0.9833420095968544	0.7318302087190666
1381	1382GLY	1381	0.01	0.0	0.11995201919232307	0.0	1.0	0.0	0.0	0.0	-0.00040016006402532334	0.0	-0.00040016006402532334	13	0.027667731629392973	27.948820471811274	1.1044349070100143	4.620600321688933	5.162649201767975	0.21642209461528963	0.9973310740613708	0.9833420095968544	0.7318302087190666
1382	1383VAL	1382	0.01	0.0	0.03998400639744103	0.0	1.0	0.0	0.0	0.0	-0.00040016006402532334	0.0	-0.00040016006402532334	13	0.027667731629392973	27.948820471811274	1.1044349070100143	4.620600321688933	5.162649201767975	0.21642209461528963	0.9973310740613708	0.9833420095968544	0.7318302087190666
79	80LEU	79	0.044444444444444446	0.10188349676753468	4.678128748500599	0.0	1.0	0.0	4.302072454222977	0.23244610839094199	0.9942146345854346	7.904187767429223	0.9913346677023659	5	0.03356321839080461	7.876849260295882	1.0203045685279188	4.790709243538424	8.286039358633536	0.20873735999503046	0.9960010581474114	0.9879193298525959	0.5935922029095344
61	62GLY	61	0.027142857142857142	0.04349524956468095	0.7596961215513794	0.0	1.0	0.0	7.16413673791769	0.13958415878737926	0.983878101051911	31.22218599091759	0.9864499962512859	5	0.03356321839080461	7.876849260295882	1.0203045685279188	4.790709243538424	8.286039358633536	0.20873735999503046	0.9960010581474114	0.9879193298525959	0.5935922029095344
64	65GLN	64	0.04	0.042426406871192854	0.23990403838464613	0.0	1.0	0.0	13.703281842109192	0.07297521947823277	0.984880010344177	10.557521332834344	0.7856882463286551	5	0.03356321839080461	7.876849260295882	1.0203045685279188	4.790709243538424	8.286039358633536	0.20873735999503046	0.9960010581474114	0.9879193298525959	0.5935922029095344
65	66LEU	65	0.02657894736842106	0.037011827113240275	2.5189924030387845	0.0	1.0158730158730158	0.0	14.699103175929213	0.06803136137159499	0.9970993016642897	26.87676059108649	0.9958589015663801	5	0.03356321839080461	7.876849260295882	1.0203045685279188	4.790709243538424	8.286039358633536	0.20873735999503046	0.9960010581474114	0.9879193298525959	0.5935922029095344
74	75ARG	74	0.0375	0.04048147724577254	2.5589764094362257	0.0	1.0	0.0	17.12644509956364	0.05838923338652916	0.9984063799079947	20.49680334698897	0.9968230992420514	5	0.03356321839080461	7.876849260295882	1.0203045685279188	4.790709243538424	8.286039358633536	0.20873735999503046	0.9960010581474114	0.9879193298525959	0.5935922029095344
82	83LEU	82	0.014583333333333332	0.012903218806001687	1.0795681727309077	0.0	1.0	0.0	47.90644247963417	0.020874019197420404	0.9992980609759273	44.947817139344465	0.8977704303941849	5	0.03356321839080461	7.876849260295882	1.0203045685279188	4.790709243538424	8.286039358633536	0.20873735999503046	0.9960010581474114	0.9879193298525959	0.5935922029095344
70	71THR	70	0.01	0.0	0.03998400639744103	0.0	1.0	0.0	0.0	0.0	-0.00040016006402532334	0.0	-0.00040016006402532334	5	0.03356321839080461	7.876849260295882	1.0203045685279188	4.790709243538424	8.286039358633536	0.20873735999503046	0.9960010581474114	0.9879193298525959	0.5935922029095344
31	32ILE	31	0.07857142857142858	0.10232002616839991	1.7592962814874051	0.0	1.0	0.0	5.668665528196812	0.17640836190208198	0.9909356867339265	14.109114627268124	0.9887358285220419	3	0.023095238095238096	3.318672530987605	1.0120481927710843	8.116458450758863	12.723511834178746	0.12320644602160234	0.9941505122258552	0.9691294341205913	0.3002611100439628
32	33THR	32	0.11333333333333333	0.053124591501697425	0.39984006397441024	0.0	1.0	0.0	9.208288663140706	0.10859781188255302	0.993981011635156	9.507299507238454	0.98612562912978	3	0.023095238095238096	3.318672530987605	1.0120481927710843	8.116458450758863	12.723511834178746	0.12320644602160234	0.9941505122258552	0.9691294341205913	0.3002611100439628
33	34SER	33	0.0775	0.052618912949622974	0.3598560575769692	0.0	1.0	0.0	11.073663086624512	0.09030435477198731	0.9938311018184445	12.45368069041669	0.9892650658989837	3	0.023095238095238096	3.318672530987605	1.0120481927710843	8.116458450758863	12.723511834178746	0.12320644602160234	0.9941505122258552	0.9691294341205913	0.3002611100439628
369	370LYS	369	0.017692307692307695	0.02314519814645489	1.839264294282287	0.0	1.0	0.0	26.034401925797702	0.038410715285496604	0.9957934442205096	53.644736915748794	0.9940783395367635	3	0.023095238095238096	3.318672530987605	1.0120481927710843	8.116458450758863	12.723511834178746	0.12320644602160234	0.9941505122258552	0.9691294341205913	0.3002611100439628
23	24LYS	23	0.03766490765171504	0.04511151364104506	55.297880847660934	0.0	1.413593637020969	0.0	13.491330274717257	0.07412167515267189	0.9997102426827865	16.38846005218671	0.998056176239045	1	0.04240039840637451	71.29148340663734	1.8564217610768368	11.592920994179389	11.4210895628305	0.08625953722121311	0.9997219836011877	0.9994650518977457	0.34761988260908794
24	25ARG	24	0.030630434782608695	0.03584741740479463	32.26709316273491	0.0	1.147459727385378	0.0	18.981423147489835	0.052683088735221796	0.9999137715524374	16.950524531983863	0.9997588083328613	1	0.04240039840637451	71.29148340663734	1.8564217610768368	11.592920994179389	11.4210895628305	0.08625953722121311	0.9997219836011877	0.9994650518977457	0.34761988260908794
25	26ARG	25	0.037142857142857144	0.039754347727831055	7.077169132347061	0.0	1.0564971751412429	0.0	20.215754305204783	0.04946637087603198	0.9998812714360075	16.30955056760099	0.9994985584502881	1	0.04240039840637451	71.29148340663734	1.8564217610768368	11.592920994179389	11.4210895628305	0.08625953722121311	0.9997219836011877	0.9994650518977457	0.34761988260908794
16	17ILE	16	0.013619631901840491	0.011972467694113425	7.197121151539384	0.0	1.0555555555555556	0.0	22.024855556446393	0.04540324895376273	0.999786178757399	54.8838269577275	0.9992623308357163	1	0.04240039840637451	71.29148340663734	1.8564217610768368	11.592920994179389	11.4210895628305	0.08625953722121311	0.9997219836011877	0.9994650518977457	0.34761988260908794
195	196GLU	195	0.027250000000000003	0.02889528508251822	2.2391043582566974	0.0	1.0	0.0	34.20470247746088	0.02923574618603825	0.9947996395626568	25.299759180443818	0.9971840220695272	1	0.04240039840637451	71.29148340663734	1.8564217610768368	11.592920994179389	11.4210895628305	0.08625953722121311	0.9997219836011877	0.9994650518977457	0.34761988260908794
2	3LYS	2	0.025714285714285714	0.017612611437054216	0.47980807676929227	0.0	1.0	0.0	34.73356739485844	0.028790592933682607	0.9988409906569916	34.6712807854351	0.9940042001655163	1	0.04240039840637451	71.29148340663734	1.8564217610768368	11.592920994179389	11.4210895628305	0.08625953722121311	0.9997219836011877	0.9994650518977457	0.34761988260908794
17	18SER	17	0.018	0.0116619037896906	0.23990403838464613	0.0	1.0	0.0	39.428877392931504	0.02536212203138383	0.9981388885977795	49.65763894148438	0.9943151320404839	1	0.04240039840637451	71.29148340663734	1.8564217610768368	11.592920994179389	11.4210895628305	0.08625953722121311	0.9997219836011877	0.9994650518977457	0.34761988260908794
21	22VAL	21	0.017320388349514562	0.012346308431592805	24.110355857656938	0.0	1.1343283582089552	0.0	41.986341307229964	0.02381726935154033	0.9999782418319973	61.64461949567785	0.9999521693643431	1	0.04240039840637451	71.29148340663734	1.8564217610768368	11.592920994179389	11.4210895628305	0.08625953722121311	0.9997219836011877	0.9994650518977457	0.34761988260908794
13	14GLU	13	0.021111111111111112	0.01911627837120584	0.3598560575769692	0.0	1.0	0.0	44.77361647053616	0.02233458181020652	0.9975381409157192	61.179585913067115	0.8968502369435294	1	0.04240039840637451	71.29148340663734	1.8564217610768368	11.592920994179389	11.4210895628305	0.08625953722121311	0.9997219836011877	0.9994650518977457	0.34761988260908794
22	23ASN	22	0.023080808080808084	0.01899238378327607	21.311475409836067	0.0	1.0619136960600375	0.0	48.06806566345368	0.020803832777492096	0.9999043700276489	44.79812577857262	0.9998591489120117	1	0.04240039840637451	71.29148340663734	1.8564217610768368	11.592920994179389	11.4210895628305	0.08625953722121311	0.9997219836011877	0.9994650518977457	0.34761988260908794
370	371GLU	370	0.016	0.009165151389911681	0.4398240703718513	0.0	1.0	0.0	49.34483353803857	0.02026554612306327	0.9995061616600373	86.10590553187733	0.9986065784131858	1	0.04240039840637451	71.29148340663734	1.8564217610768368	11.592920994179389	11.4210895628305	0.08625953722121311	0.9997219836011877	0.9994650518977457	0.34761988260908794
18	19ILE	18	0.018571428571428572	0.008329931278350428	0.2798880447820872	0.0	1.0	0.0	57.06764959358988	0.017523062665477727	0.9965627612370255	58.330606157635046	0.9936572571949599	1	0.04240039840637451	71.29148340663734	1.8564217610768368	11.592920994179389	11.4210895628305	0.08625953722121311	0.9997219836011877	0.9994650518977457	0.34761988260908794
274	275ASN	274	0.02	0.0	0.03998400639744103	0.0	1.0	0.0	59.89496507342637	0.016695894200356925	0.9763873287863242	59.89496507342638	0.9763873287863241	1	0.04240039840637451	71.29148340663734	1.8564217610768368	11.592920994179389	11.4210895628305	0.08625953722121311	0.9997219836011877	0.9994650518977457	0.34761988260908794
20	21GLY	20	0.016226415094339624	0.012472825570595026	2.5589764094362257	0.0	1.0625	0.0	65.66281703134361	0.015229319197844622	0.9997609997311827	58.53143905888987	0.9995843477623284	1	0.04240039840637451	71.29148340663734	1.8564217610768368	11.592920994179389	11.4210895628305	0.08625953722121311	0.9997219836011877	0.9994650518977457	0.34761988260908794
375	376MET	375	0.015	0.005	0.07996801279488205	0.0	1.0	0.0	78.05103835872583	0.012812129358279108	0.9946937684248531	37.20991185083297	0.49531616021656105	1	0.04240039840637451	71.29148340663734	1.8564217610768368	11.592920994179389	11.4210895628305	0.08625953722121311	0.9997219836011877	0.9994650518977457	0.34761988260908794
273	274PRO	273	0.015	0.007637626158259733	0.3198720511795282	0.0	1.0	0.0	78.33172621484334	0.01276621936375132	0.9994162431836086	95.8155526359773	0.9982723299673368	1	0.04240039840637451	71.29148340663734	1.8564217610768368	11.592920994179389	11.4210895628305	0.08625953722121311	0.9997219836011877	0.9994650518977457	0.34761988260908794
19	20ASN	19	0.01636363636363637	0.009791208740244552	1.919232307077169	0.0	1.0	0.0	81.44119180037026	0.012278798699940608	0.9998440043834751	71.4000311565921	0.9991542986766305	1	0.04240039840637451	71.29148340663734	1.8564217610768368	11.592920994179389	11.4210895628305	0.08625953722121311	0.9997219836011877	0.9994650518977457	0.34761988260908794
14	15THR	14	0.014875621890547263	0.008702344439437303	8.876449420231907	0.0	1.0495495495495495	0.0	103.54974851517386	0.00965719390282694	0.9999380447960596	84.83470187649748	0.9998847681656382	1	0.04240039840637451	71.29148340663734	1.8564217610768368	11.592920994179389	11.4210895628305	0.08625953722121311	0.9997219836011877	0.9994650518977457	0.34761988260908794
0	1MET	0	0.011	0.003	0.39984006397441024	0.0	1.1	0.0	174.84244474025857	0.005719435011822068	0.9999923100626968	47.29136608977793	0.29969727494776405	1	0.04240039840637451	71.29148340663734	1.8564217610768368	11.592920994179389	11.4210895628305	0.08625953722121311	0.9997219836011877	0.9994650518977457	0.34761988260908794
272	273LYS	272	0.01625	0.006959705453537527	0.3198720511795282	0.0	1.125	0.0	219.76865802536435	0.00455023936982218	0.9998702362670839	128.34545806074124	0.9961018398914862	1	0.04240039840637451	71.29148340663734	1.8564217610768368	11.592920994179389	11.4210895628305	0.08625953722121311	0.9997219836011877	0.9994650518977457	0.34761988260908794
327	328ASN	327	0.01	0.0	0.03998400639744103	0.0	1.0	0.0	0.0	0.0	-0.00040016006402532334	0.0	-0.00040016006402532334	1	0.04240039840637451	71.29148340663734	1.8564217610768368	11.592920994179389	11.4210895628305	0.08625953722121311	0.9997219836011877	0.9994650518977457	0.34761988260908794
330	331SER	330	0.01	0.0	0.03998400639744103	0.0	1.0	0.0	0.0	0.0	-0.00040016006402532334	0.0	-0.00040016006402532334	1	0.04240039840637451	71.29148340663734	1.8564217610768368	11.592920994179389	11.4210895628305	0.08625953722121311	0.9997219836011877	0.9994650518977457	0.34761988260908794
331	332TYR	331	0.01	0.0	0.07996801279488205	0.0	1.0	0.0	0.0	0.0	-0.00040016006402532334	0.0	-0.00040016006402532334	1	0.04240039840637451	71.29148340663734	1.8564217610768368	11.592920994179389	11.4210895628305	0.08625953722121311	0.9997219836011877	0.9994650518977457	0.34761988260908794
332	333LYS	332	0.01	0.0	0.03998400639744103	0.0	1.0	0.0	0.0	0.0	-0.00040016006402532334	0.0	-0.00040016006402532334	1	0.04240039840637451	71.29148340663734	1.8564217610768368	11.592920994179389	11.4210895628305	0.08625953722121311	0.9997219836011877	0.9994650518977457	0.34761988260908794
429	430PRO	429	0.026000000000000002	0.03352610922848042	0.7596961215513794	0.0	1.0	0.0	5.306614473182886	0.1884440644884843	0.9869617905759354	56.799192334927724	0.9918994284117375	8	0.027076923076923075	17.113154738104758	1.0537383177570094	14.20478844448364	14.56109409839892	0.07039879572358891	0.9996541918682674	0.9975598347651966	0.8088968434034772
440	441VAL	440	0.03321428571428572	0.030125164069330503	2.6389444222311074	0.0	1.0	0.0	5.339854627719055	0.18727101573309213	0.9982882976991779	21.081463660434004	0.9977712791413653	8	0.027076923076923075	17.113154738104758	1.0537383177570094	14.20478844448364	14.56109409839892	0.07039879572358891	0.9996541918682674	0.9975598347651966	0.8088968434034772
436	437LYS	436	0.030555555555555558	0.027074428735580455	2.7189124350259894	0.0	1.0	0.0	9.560509887130591	0.10459693173332739	0.9996515281989237	25.344060167500324	0.9991561469054802	8	0.027076923076923075	17.113154738104758	1.0537383177570094	14.20478844448364	14.56109409839892	0.07039879572358891	0.9996541918682674	0.9975598347651966	0.8088968434034772
432	433LEU	432	0.03125	0.04539754949333719	0.5997600959616154	0.0	1.0	0.0	11.626538486727844	0.08601012254348445	0.9821143800334442	28.48467134627585	0.991221296466105	8	0.027076923076923075	17.113154738104758	1.0537383177570094	14.20478844448364	14.56109409839892	0.07039879572358891	0.9996541918682674	0.9975598347651966	0.8088968434034772
431	432ASN	431	0.04777777777777778	0.05411464738615965	0.9996001599360256	0.0	1.0	0.0	11.774131508146473	0.08493195437031632	0.9970801935624746	18.961987771470508	0.9929851664296203	8	0.027076923076923075	17.113154738104758	1.0537383177570094	14.20478844448364	14.56109409839892	0.07039879572358891	0.9996541918682674	0.9975598347651966	0.8088968434034772
418	419SER	418	0.019	0.014106735979665884	1.1195521791283487	0.0	1.0	0.0	11.984601428003442	0.08344040525731473	0.9982563980643324	40.917555663156705	0.9972713965034844	8	0.027076923076923075	17.113154738104758	1.0537383177570094	14.20478844448364	14.56109409839892	0.07039879572358891	0.9996541918682674	0.9975598347651966	0.8088968434034772
67	68PRO	67	0.03695652173913044	0.049645244319611065	2.3190723710515795	0.0	1.0	0.0	13.309328389300134	0.07513527134877349	0.9977142341548964	20.173734123964756	0.995003549090242	8	0.027076923076923075	17.113154738104758	1.0537383177570094	14.20478844448364	14.56109409839892	0.07039879572358891	0.9996541918682674	0.9975598347651966	0.8088968434034772
444	445ILE	444	0.04909090909090908	0.036545002258621416	1.1595361855257897	0.0	1.0	0.0	16.452838665639405	0.06077978519830925	0.9965589760455248	16.309543190149796	0.9950310291308803	8	0.027076923076923075	17.113154738104758	1.0537383177570094	14.20478844448364	14.56109409839892	0.07039879572358891	0.9996541918682674	0.9975598347651966	0.8088968434034772
428	429LEU	428	0.026000000000000002	0.032	0.39984006397441024	0.0	1.0	0.0	17.595330578156755	0.05683326014013188	0.9832064458868127	16.818298507605732	0.9837003734888002	8	0.027076923076923075	17.113154738104758	1.0537383177570094	14.20478844448364	14.56109409839892	0.07039879572358891	0.9996541918682674	0.9975598347651966	0.8088968434034772
66	67VAL	66	0.019636363636363643	0.0245663210968066	3.358656537385046	0.0	1.0	0.0	21.025956992922097	0.04756026088784577	0.9985640162169563	32.7058758319035	0.9944154198152122	8	0.027076923076923075	17.113154738104758	1.0537383177570094	14.20478844448364	14.56109409839892	0.07039879572358891	0.9996541918682674	0.9975598347651966	0.8088968434034772
421	422LYS	421	0.022272727272727274	0.01621778434082843	1.4794082367053178	0.0	1.0	0.0	22.223636529633254	0.04499713620975525	0.9995942605838514	37.5968241842093	0.9986634023066057	8	0.027076923076923075	17.113154738104758	1.0537383177570094	14.20478844448364	14.56109409839892	0.07039879572358891	0.9996541918682674	0.9975598347651966	0.8088968434034772
430	431PHE	430	0.038	0.038678159211627434	1.1995201919232308	0.0	1.0	0.0	22.97283296430356	0.04352967705610599	0.9977705876232255	58.179126385733056	0.9953391513105073	8	0.027076923076923075	17.113154738104758	1.0537383177570094	14.20478844448364	14.56109409839892	0.07039879572358891	0.9996541918682674	0.9975598347651966	0.8088968434034772
438	439PRO	438	0.02347826086956522	0.018558648669924387	1.4394242303078768	0.0	1.0	0.0	23.282875075280348	0.04295002214145407	0.9984362559733557	43.02257566579259	0.9980444212041049	8	0.027076923076923075	17.113154738104758	1.0537383177570094	14.20478844448364	14.56109409839892	0.07039879572358891	0.9996541918682674	0.9975598347651966	0.8088968434034772
443	444ILE	443	0.020000000000000007	0.025123073680758716	4.318272690923631	0.0	1.0092592592592593	0.0	26.233185057047038	0.03811965637513655	0.9987588885361077	23.227630744953725	0.9943389102868887	8	0.027076923076923075	17.113154738104758	1.0537383177570094	14.20478844448364	14.56109409839892	0.07039879572358891	0.9996541918682674	0.9975598347651966	0.8088968434034772
425	426PHE	425	0.03333333333333333	0.020548046676563254	0.3198720511795282	0.0	1.0	0.0	26.970022244663426	0.03707820449417207	0.9951128034025344	38.03636655288002	0.9903215994044867	8	0.027076923076923075	17.113154738104758	1.0537383177570094	14.20478844448364	14.56109409839892	0.07039879572358891	0.9996541918682674	0.9975598347651966	0.8088968434034772
439	440ILE	439	0.03128205128205129	0.02451367877480435	3.0787684926029586	0.0	1.0	0.0	27.06580349745438	0.036946991065462106	0.9991633466921529	24.88473773505898	0.998203455507166	8	0.027076923076923075	17.113154738104758	1.0537383177570094	14.20478844448364	14.56109409839892	0.07039879572358891	0.9996541918682674	0.9975598347651966	0.8088968434034772
411	412TYR	411	0.02098591549295775	0.02438857557398689	4.198320671731308	0.0	1.0285714285714285	0.0	27.3926185485332	0.0365061849865955	0.9992415805182069	35.048683400015136	0.9990058684960077	8	0.027076923076923075	17.113154738104758	1.0537383177570094	14.20478844448364	14.56109409839892	0.07039879572358891	0.9996541918682674	0.9975598347651966	0.8088968434034772
437	438ALA	437	0.03346153846153846	0.02111184641786686	1.799280287884846	0.0	1.0	0.0	29.38046023058971	0.03403622653122505	0.9985052401515337	34.89844085810511	0.9972005163591378	8	0.027076923076923075	17.113154738104758	1.0537383177570094	14.20478844448364	14.56109409839892	0.07039879572358891	0.9996541918682674	0.9975598347651966	0.8088968434034772
435	436PRO	435	0.013793103448275867	0.007150497018388868	1.3594562175129947	0.0	1.0	0.0	30.851629804499424	0.032413198470771204	0.9991163519024404	96.77099577658683	0.9989378723106223	8	0.027076923076923075	17.113154738104758	1.0537383177570094	14.20478844448364	14.56109409839892	0.07039879572358891	0.9996541918682674	0.9975598347651966	0.8088968434034772
415	416ILE	415	0.024	0.01854723699099141	1.3194722111155537	0.0	1.0	0.0	37.68136656833161	0.02653831564698149	0.9990781125835771	39.89004899644151	0.9981503791021142	8	0.027076923076923075	17.113154738104758	1.0537383177570094	14.20478844448364	14.56109409839892	0.07039879572358891	0.9996541918682674	0.9975598347651966	0.8088968434034772
441	442SER	441	0.025	0.004999999999999999	0.11995201919232307	0.0	1.0	0.0	46.39032363183988	0.021556219524057223	0.9853549162556323	50.455303645633364	0.9772713572495239	8	0.027076923076923075	17.113154738104758	1.0537383177570094	14.20478844448364	14.56109409839892	0.07039879572358891	0.9996541918682674	0.9975598347651966	0.8088968434034772
68	69GLU	68	0.019090909090909092	0.011642044068059725	0.6397441023590564	0.0	1.0	0.0	51.7622744160757	0.019319089264930603	0.9987622669042959	42.59000303430208	0.9975320907146221	8	0.027076923076923075	17.113154738104758	1.0537383177570094	14.20478844448364	14.56109409839892	0.07039879572358891	0.9996541918682674	0.9975598347651966	0.8088968434034772
69	70LEU	69	0.016923076923076923	0.00910166120476864	0.5597760895641744	0.0	1.0	0.0	66.3772027904208	0.015065413394375737	0.9996998208420232	66.17858111355852	0.9970725791337468	8	0.027076923076923075	17.113154738104758	1.0537383177570094	14.20478844448364	14.56109409839892	0.07039879572358891	0.9996541918682674	0.9975598347651966	0.8088968434034772
434	435GLU	434	0.015	0.006454972243679028	0.5197920831667333	0.0	1.0	0.0	78.14799000652997	0.012796234425433603	0.9988747690082571	77.9353160955707	0.996534382523589	8	0.027076923076923075	17.113154738104758	1.0537383177570094	14.20478844448364	14.56109409839892	0.07039879572358891	0.9996541918682674	0.9975598347651966	0.8088968434034772
414	415ALA	414	0.012	0.004	0.19992003198720512	0.0	1.0	0.0	123.22643475050604	0.008115141868907258	0.9997892498032755	83.8860560962444	0.798726465582589	8	0.027076923076923075	17.113154738104758	1.0537383177570094	14.20478844448364	14.56109409839892	0.07039879572358891	0.9996541918682674	0.9975598347651966	0.8088968434034772
442	443GLY	442	0.011428571428571429	0.0034992710611188257	0.2798880447820872	0.0	1.0	0.0	146.67217245481402	0.006817925876894437	0.9999544354294425	54.233586294685416	0.39965811012452146	8	0.027076923076923075	17.113154738104758	1.0537383177570094	14.20478844448364	14.56109409839892	0.07039879572358891	0.9996541918682674	0.9975598347651966	0.8088968434034772
433	434VAL	433	0.016	0.008	0.19992003198720512	0.0	1.0	0.0	165.5739050058132	0.006039599053757237	0.9990472434590882	105.15621361661927	0.996324237088505	8	0.027076923076923075	17.113154738104758	1.0537383177570094	14.20478844448364	14.56109409839892	0.07039879572358891	0.9996541918682674	0.9975598347651966	0.8088968434034772
123	124PRO	123	0.01415584415584416	0.010300756415378405	6.917233106757297	0.0	1.046242774566474	0.0	39.56839583566854	0.025272695010257654	0.9998812502720035	54.25663931795492	0.9997577333403831	0	0.01628930817610063	14.0343862455018	1.1139601139601139	49.43310871034075	61.54952531909869	0.020229356924720644	0.9999476780125512	0.9999483589622322	0.46810234188874744
176	177TYR	176	0.012068965517241383	0.004827586206896552	1.2794882047181129	0.0	1.0	0.0	61.5741487685171	0.01624058180259084	0.9999886564429743	85.38411868864371	0.9997573112096507	0	0.01628930817610063	14.0343862455018	1.1139601139601139	49.43310871034075	61.54952531909869	0.020229356924720644	0.9999476780125512	0.9999483589622322	0.46810234188874744
121	122SER	121	0.014181818181818186	0.009475501251487552	2.3190723710515795	0.0	1.0	0.0	77.91836994264291	0.012833944046007606	0.9999372852685636	84.45684817839978	0.9996225859493727	0	0.01628930817610063	14.0343862455018	1.1139601139601139	49.43310871034075	61.54952531909869	0.020229356924720644	0.9999476780125512	0.9999483589622322	0.46810234188874744
10	11GLU	10	0.01454545454545455	0.008907235428302466	2.4390243902439024	0.0	1.0163934426229508	0.0	94.26518463665533	0.010608370458876146	0.9998983245517943	93.82692949998734	0.9997446123226457	0	0.01628930817610063	14.0343862455018	1.1139601139601139	49.43310871034075	61.54952531909869	0.020229356924720644	0.9999476780125512	0.9999483589622322	0.46810234188874744
9	10VAL	9	0.013333333333333334	0.004714045207910317	0.11995201919232307	0.0	1.0	0.0	94.61374302722459	0.010569289069477524	0.9984721040748877	70.59927415851364	0.7968433797467191	0	0.01628930817610063	14.0343862455018	1.1139601139601139	49.43310871034075	61.54952531909869	0.020229356924720644	0.9999476780125512	0.9999483589622322	0.46810234188874744
177	178ASP	177	0.013333333333333334	0.006749485577105528	2.5989604158336665	0.0	1.0	0.0	127.92043713543086	0.007817359152246238	0.9998992216701211	106.511094141803	0.9997879113764029	0	0.01628930817610063	14.0343862455018	1.1139601139601139	49.43310871034075	61.54952531909869	0.020229356924720644	0.9999476780125512	0.9999483589622322	0.46810234188874744
179	180LYS	179	0.010833333333333332	0.002763853991962833	0.47980807676929227	0.0	1.0	0.0	190.29287646496982	0.005255057459726221	0.9999970489209425	146.753118015518	0.799908526198392	0	0.01628930817610063	14.0343862455018	1.1139601139601139	49.43310871034075	61.54952531909869	0.020229356924720644	0.9999476780125512	0.9999483589622322	0.46810234188874744
178	179ASP	178	0.010606060606060605	0.002386062992124791	1.3994402239104358	0.0	1.0	0.0	218.5256645610005	0.0045761215370694105	0.9999994775496246	223.1811927099183	0.9999838070626099	0	0.01628930817610063	14.0343862455018	1.1139601139601139	49.43310871034075	61.54952531909869	0.020229356924720644	0.9999476780125512	0.9999483589622322	0.46810234188874744
15	16GLN	15	0.010588235294117647	0.002352941176470588	0.7197121151539384	0.0	1.0	0.0	221.2300684846254	0.004520181216096744	0.9999995572118416	147.12970674592776	0.7998919700973494	0	0.01628930817610063	14.0343862455018	1.1139601139601139	49.43310871034075	61.54952531909869	0.020229356924720644	0.9999476780125512	0.9999483589622322	0.46810234188874744
8	9ASN	8	0.01	0.0	0.1599360255897641	0.0	1.0	0.0	0.0	0.0	-0.00040016006402532334	0.0	-0.00040016006402532334	0	0.01628930817610063	14.0343862455018	1.1139601139601139	49.43310871034075	61.54952531909869	0.020229356924720644	0.9999476780125512	0.9999483589622322	0.46810234188874744
180	181LEU	180	0.01	0.0	0.03998400639744103	0.0	1.0	0.0	0.0	0.0	-0.00040016006402532334	0.0	-0.00040016006402532334	0	0.01628930817610063	14.0343862455018	1.1139601139601139	49.43310871034075	61.54952531909869	0.020229356924720644	0.9999476780125512	0.9999483589622322	0.46810234188874744
325	326ASN	325	0.01	0.0	0.03998400639744103	0.0	1.0	0.0	0.0	0.0	-0.00040016006402532334	0.0	-0.00040016006402532334	0	0.01628930817610063	14.0343862455018	1.1139601139601139	49.43310871034075	61.54952531909869	0.020229356924720644	0.9999476780125512	0.9999483589622322	0.46810234188874744
326	327ASP	326	0.01	0.0	0.03998400639744103	0.0	1.0	0.0	0.0	0.0	-0.00040016006402532334	0.0	-0.00040016006402532334	0	0.01628930817610063	14.0343862455018	1.1139601139601139	49.43310871034075	61.54952531909869	0.020229356924720644	0.9999476780125512	0.9999483589622322	0.46810234188874744
160	161ASP	160	0.04	0.0	0.11995201919232307	0.0	1.0	0.0	30.03795556016311	0.033291213777751856	0.9767096661971979	30.037955560163105	0.976709666197198	-1	0.0	0.0	0.0	0.0	0.0	0.0	0.0	0.0	0.0
1	2PRO	1	0.0	0.0	0.0	0.0	0.0	0.0	0.0	0.0	0.0	0.0	0.0	-1	0.0	0.0	0.0	0.0	0.0	0.0	0.0	0.0	0.0
3	4HIS	3	0.0	0.0	0.0	0.0	0.0	0.0	0.0	0.0	0.0	0.0	0.0	-1	0.0	0.0	0.0	0.0	0.0	0.0	0.0	0.0	0.0
4	5ILE	4	0.0	0.0	0.0	0.0	0.0	0.0	0.0	0.0	0.0	0.0	0.0	-1	0.0	0.0	0.0	0.0	0.0	0.0	0.0	0.0	0.0
5	6LYS	5	0.0	0.0	0.0	0.0	0.0	0.0	0.0	0.0	0.0	0.0	0.0	-1	0.0	0.0	0.0	0.0	0.0	0.0	0.0	0.0	0.0
6	7GLY	6	0.0	0.0	0.0	0.0	0.0	0.0	0.0	0.0	0.0	0.0	0.0	-1	0.0	0.0	0.0	0.0	0.0	0.0	0.0	0.0	0.0
7	8ASP	7	0.0	0.0	0.0	0.0	0.0	0.0	0.0	0.0	0.0	0.0	0.0	-1	0.0	0.0	0.0	0.0	0.0	0.0	0.0	0.0	0.0
11	12ALA	11	0.0	0.0	0.0	0.0	0.0	0.0	0.0	0.0	0.0	0.0	0.0	-1	0.0	0.0	0.0	0.0	0.0	0.0	0.0	0.0	0.0
12	13ASN	12	0.0	0.0	0.0	0.0	0.0	0.0	0.0	0.0	0.0	0.0	0.0	-1	0.0	0.0	0.0	0.0	0.0	0.0	0.0	0.0	0.0
53	54SER	53	0.0	0.0	0.0	0.0	0.0	0.0	0.0	0.0	0.0	0.0	0.0	-1	0.0	0.0	0.0	0.0	0.0	0.0	0.0	0.0	0.0
54	55ASN	54	0.01	0.0	0.11995201919232307	0.0	1.0	0.0	0.0	0.0	-0.00040016006402532334	0.0	-0.00040016006402532334	-1	0.0	0.0	0.0	0.0	0.0	0.0	0.0	0.0	0.0
57	58PHE	57	0.0	0.0	0.0	0.0	0.0	0.0	0.0	0.0	0.0	0.0	0.0	-1	0.0	0.0	0.0	0.0	0.0	0.0	0.0	0.0	0.0
71	72ALA	71	0.0	0.0	0.0	0.0	0.0	0.0	0.0	0.0	0.0	0.0	0.0	-1	0.0	0.0	0.0	0.0	0.0	0.0	0.0	0.0	0.0
72	73THR	72	0.0	0.0	0.0	0.0	0.0	0.0	0.0	0.0	0.0	0.0	0.0	-1	0.0	0.0	0.0	0.0	0.0	0.0	0.0	0.0	0.0
77	78THR	77	0.0	0.0	0.0	0.0	0.0	0.0	0.0	0.0	0.0	0.0	0.0	-1	0.0	0.0	0.0	0.0	0.0	0.0	0.0	0.0	0.0
78	79ILE	78	0.0	0.0	0.0	0.0	0.0	0.0	0.0	0.0	0.0	0.0	0.0	-1	0.0	0.0	0.0	0.0	0.0	0.0	0.0	0.0	0.0
85	86VAL	85	0.0	0.0	0.0	0.0	0.0	0.0	0.0	0.0	0.0	0.0	0.0	-1	0.0	0.0	0.0	0.0	0.0	0.0	0.0	0.0	0.0
89	90ASN	89	0.0	0.0	0.0	0.0	0.0	0.0	0.0	0.0	0.0	0.0	0.0	-1	0.0	0.0	0.0	0.0	0.0	0.0	0.0	0.0	0.0
93	94ASP	93	0.0	0.0	0.0	0.0	0.0	0.0	0.0	0.0	0.0	0.0	0.0	-1	0.0	0.0	0.0	0.0	0.0	0.0	0.0	0.0	0.0
96	97GLU	96	0.0	0.0	0.0	0.0	0.0	0.0	0.0	0.0	0.0	0.0	0.0	-1	0.0	0.0	0.0	0.0	0.0	0.0	0.0	0.0	0.0
99	100ASN	99	0.0	0.0	0.0	0.0	0.0	0.0	0.0	0.0	0.0	0.0	0.0	-1	0.0	0.0	0.0	0.0	0.0	0.0	0.0	0.0	0.0
100	101ARG	100	0.0	0.0	0.0	0.0	0.0	0.0	0.0	0.0	0.0	0.0	0.0	-1	0.0	0.0	0.0	0.0	0.0	0.0	0.0	0.0	0.0
103	104THR	103	0.0	0.0	0.0	0.0	0.0	0.0	0.0	0.0	0.0	0.0	0.0	-1	0.0	0.0	0.0	0.0	0.0	0.0	0.0	0.0	0.0
104	105ASP	104	0.0	0.0	0.0	0.0	0.0	0.0	0.0	0.0	0.0	0.0	0.0	-1	0.0	0.0	0.0	0.0	0.0	0.0	0.0	0.0	0.0
106	107ILE	106	0.0	0.0	0.0	0.0	0.0	0.0	0.0	0.0	0.0	0.0	0.0	-1	0.0	0.0	0.0	0.0	0.0	0.0	0.0	0.0	0.0
107	108GLU	107	0.0	0.0	0.0	0.0	0.0	0.0	0.0	0.0	0.0	0.0	0.0	-1	0.0	0.0	0.0	0.0	0.0	0.0	0.0	0.0	0.0
110	111ARG	110	0.0	0.0	0.0	0.0	0.0	0.0	0.0	0.0	0.0	0.0	0.0	-1	0.0	0.0	0.0	0.0	0.0	0.0	0.0	0.0	0.0
111	112ILE	111	0.0	0.0	0.0	0.0	0.0	0.0	0.0	0.0	0.0	0.0	0.0	-1	0.0	0.0	0.0	0.0	0.0	0.0	0.0	0.0	0.0
112	113CYS	112	0.0	0.0	0.0	0.0	0.0	0.0	0.0	0.0	0.0	0.0	0.0	-1	0.0	0.0	0.0	0.0	0.0	0.0	0.0	0.0	0.0
113	114TYR	113	0.0	0.0	0.0	0.0	0.0	0.0	0.0	0.0	0.0	0.0	0.0	-1	0.0	0.0	0.0	0.0	0.0	0.0	0.0	0.0	0.0
114	115VAL	114	0.0	0.0	0.0	0.0	0.0	0.0	0.0	0.0	0.0	0.0	0.0	-1	0.0	0.0	0.0	0.0	0.0	0.0	0.0	0.0	0.0
115	116ILE	115	0.0	0.0	0.0	0.0	0.0	0.0	0.0	0.0	0.0	0.0	0.0	-1	0.0	0.0	0.0	0.0	0.0	0.0	0.0	0.0	0.0
116	117SER	116	0.0	0.0	0.0	0.0	0.0	0.0	0.0	0.0	0.0	0.0	0.0	-1	0.0	0.0	0.0	0.0	0.0	0.0	0.0	0.0	0.0
117	118ASP	117	0.0	0.0	0.0	0.0	0.0	0.0	0.0	0.0	0.0	0.0	0.0	-1	0.0	0.0	0.0	0.0	0.0	0.0	0.0	0.0	0.0
118	119GLY	118	0.0	0.0	0.0	0.0	0.0	0.0	0.0	0.0	0.0	0.0	0.0	-1	0.0	0.0	0.0	0.0	0.0	0.0	0.0	0.0	0.0
119	120ASN	119	0.0	0.0	0.0	0.0	0.0	0.0	0.0	0.0	0.0	0.0	0.0	-1	0.0	0.0	0.0	0.0	0.0	0.0	0.0	0.0	0.0
120	121LEU	120	0.0	0.0	0.0	0.0	0.0	0.0	0.0	0.0	0.0	0.0	0.0	-1	0.0	0.0	0.0	0.0	0.0	0.0	0.0	0.0	0.0
122	123GLN	122	0.01	0.0	0.03998400639744103	0.0	1.0	0.0	0.0	0.0	-0.00040016006402532334	0.0	-0.00040016006402532334	-1	0.0	0.0	0.0	0.0	0.0	0.0	0.0	0.0	0.0
159	160ASN	159	0.0	0.0	0.0	0.0	0.0	0.0	0.0	0.0	0.0	0.0	0.0	-1	0.0	0.0	0.0	0.0	0.0	0.0	0.0	0.0	0.0
162	163ASP	162	0.0	0.0	0.0	0.0	0.0	0.0	0.0	0.0	0.0	0.0	0.0	-1	0.0	0.0	0.0	0.0	0.0	0.0	0.0	0.0	0.0
163	164ILE	163	0.0	0.0	0.0	0.0	0.0	0.0	0.0	0.0	0.0	0.0	0.0	-1	0.0	0.0	0.0	0.0	0.0	0.0	0.0	0.0	0.0
166	167ILE	166	0.0	0.0	0.0	0.0	0.0	0.0	0.0	0.0	0.0	0.0	0.0	-1	0.0	0.0	0.0	0.0	0.0	0.0	0.0	0.0	0.0
167	168ALA	167	0.0	0.0	0.0	0.0	0.0	0.0	0.0	0.0	0.0	0.0	0.0	-1	0.0	0.0	0.0	0.0	0.0	0.0	0.0	0.0	0.0
170	171ASN	170	0.0	0.0	0.0	0.0	0.0	0.0	0.0	0.0	0.0	0.0	0.0	-1	0.0	0.0	0.0	0.0	0.0	0.0	0.0	0.0	0.0
171	172TYR	171	0.0	0.0	0.0	0.0	0.0	0.0	0.0	0.0	0.0	0.0	0.0	-1	0.0	0.0	0.0	0.0	0.0	0.0	0.0	0.0	0.0
173	174MET	173	0.0	0.0	0.0	0.0	0.0	0.0	0.0	0.0	0.0	0.0	0.0	-1	0.0	0.0	0.0	0.0	0.0	0.0	0.0	0.0	0.0
175	176ASN	175	0.0	0.0	0.0	0.0	0.0	0.0	0.0	0.0	0.0	0.0	0.0	-1	0.0	0.0	0.0	0.0	0.0	0.0	0.0	0.0	0.0
181	182GLU	181	0.01	0.0	0.03998400639744103	0.0	1.0	0.0	0.0	0.0	-0.00040016006402532334	0.0	-0.00040016006402532334	-1	0.0	0.0	0.0	0.0	0.0	0.0	0.0	0.0	0.0
182	183ASN	182	0.0	0.0	0.0	0.0	0.0	0.0	0.0	0.0	0.0	0.0	0.0	-1	0.0	0.0	0.0	0.0	0.0	0.0	0.0	0.0	0.0
183	184ILE	183	0.0	0.0	0.0	0.0	0.0	0.0	0.0	0.0	0.0	0.0	0.0	-1	0.0	0.0	0.0	0.0	0.0	0.0	0.0	0.0	0.0
184	185ASP	184	0.0	0.0	0.0	0.0	0.0	0.0	0.0	0.0	0.0	0.0	0.0	-1	0.0	0.0	0.0	0.0	0.0	0.0	0.0	0.0	0.0
185	186GLY	185	0.0	0.0	0.0	0.0	0.0	0.0	0.0	0.0	0.0	0.0	0.0	-1	0.0	0.0	0.0	0.0	0.0	0.0	0.0	0.0	0.0
186	187THR	186	0.0	0.0	0.0	0.0	0.0	0.0	0.0	0.0	0.0	0.0	0.0	-1	0.0	0.0	0.0	0.0	0.0	0.0	0.0	0.0	0.0
187	188ILE	187	0.0	0.0	0.0	0.0	0.0	0.0	0.0	0.0	0.0	0.0	0.0	-1	0.0	0.0	0.0	0.0	0.0	0.0	0.0	0.0	0.0
188	189GLN	188	0.0	0.0	0.0	0.0	0.0	0.0	0.0	0.0	0.0	0.0	0.0	-1	0.0	0.0	0.0	0.0	0.0	0.0	0.0	0.0	0.0
189	190LYS	189	0.0	0.0	0.0	0.0	0.0	0.0	0.0	0.0	0.0	0.0	0.0	-1	0.0	0.0	0.0	0.0	0.0	0.0	0.0	0.0	0.0
191	192TRP	191	0.0	0.0	0.0	0.0	0.0	0.0	0.0	0.0	0.0	0.0	0.0	-1	0.0	0.0	0.0	0.0	0.0	0.0	0.0	0.0	0.0
194	195ILE	194	0.0	0.0	0.0	0.0	0.0	0.0	0.0	0.0	0.0	0.0	0.0	-1	0.0	0.0	0.0	0.0	0.0	0.0	0.0	0.0	0.0
196	197VAL	196	0.0	0.0	0.0	0.0	0.0	0.0	0.0	0.0	0.0	0.0	0.0	-1	0.0	0.0	0.0	0.0	0.0	0.0	0.0	0.0	0.0
197	198GLY	197	0.0	0.0	0.0	0.0	0.0	0.0	0.0	0.0	0.0	0.0	0.0	-1	0.0	0.0	0.0	0.0	0.0	0.0	0.0	0.0	0.0
198	199ASP	198	0.0	0.0	0.0	0.0	0.0	0.0	0.0	0.0	0.0	0.0	0.0	-1	0.0	0.0	0.0	0.0	0.0	0.0	0.0	0.0	0.0
199	200ILE	199	0.0	0.0	0.0	0.0	0.0	0.0	0.0	0.0	0.0	0.0	0.0	-1	0.0	0.0	0.0	0.0	0.0	0.0	0.0	0.0	0.0
200	201ILE	200	0.0	0.0	0.0	0.0	0.0	0.0	0.0	0.0	0.0	0.0	0.0	-1	0.0	0.0	0.0	0.0	0.0	0.0	0.0	0.0	0.0
201	202ILE	201	0.0	0.0	0.0	0.0	0.0	0.0	0.0	0.0	0.0	0.0	0.0	-1	0.0	0.0	0.0	0.0	0.0	0.0	0.0	0.0	0.0
202	203CYS	202	0.0	0.0	0.0	0.0	0.0	0.0	0.0	0.0	0.0	0.0	0.0	-1	0.0	0.0	0.0	0.0	0.0	0.0	0.0	0.0	0.0
203	204ARG	203	0.0	0.0	0.0	0.0	0.0	0.0	0.0	0.0	0.0	0.0	0.0	-1	0.0	0.0	0.0	0.0	0.0	0.0	0.0	0.0	0.0
204	205ARG	204	0.0	0.0	0.0	0.0	0.0	0.0	0.0	0.0	0.0	0.0	0.0	-1	0.0	0.0	0.0	0.0	0.0	0.0	0.0	0.0	0.0
205	206SER	205	0.0	0.0	0.0	0.0	0.0	0.0	0.0	0.0	0.0	0.0	0.0	-1	0.0	0.0	0.0	0.0	0.0	0.0	0.0	0.0	0.0
206	207ASP	206	0.0	0.0	0.0	0.0	0.0	0.0	0.0	0.0	0.0	0.0	0.0	-1	0.0	0.0	0.0	0.0	0.0	0.0	0.0	0.0	0.0
207	208PHE	207	0.0	0.0	0.0	0.0	0.0	0.0	0.0	0.0	0.0	0.0	0.0	-1	0.0	0.0	0.0	0.0	0.0	0.0	0.0	0.0	0.0
208	209PHE	208	0.0	0.0	0.0	0.0	0.0	0.0	0.0	0.0	0.0	0.0	0.0	-1	0.0	0.0	0.0	0.0	0.0	0.0	0.0	0.0	0.0
209	210CYS	209	0.0	0.0	0.0	0.0	0.0	0.0	0.0	0.0	0.0	0.0	0.0	-1	0.0	0.0	0.0	0.0	0.0	0.0	0.0	0.0	0.0
210	211ALA	210	0.0	0.0	0.0	0.0	0.0	0.0	0.0	0.0	0.0	0.0	0.0	-1	0.0	0.0	0.0	0.0	0.0	0.0	0.0	0.0	0.0
211	212ASP	211	0.0	0.0	0.0	0.0	0.0	0.0	0.0	0.0	0.0	0.0	0.0	-1	0.0	0.0	0.0	0.0	0.0	0.0	0.0	0.0	0.0
212	213ILE	212	0.0	0.0	0.0	0.0	0.0	0.0	0.0	0.0	0.0	0.0	0.0	-1	0.0	0.0	0.0	0.0	0.0	0.0	0.0	0.0	0.0
213	214LEU	213	0.0	0.0	0.0	0.0	0.0	0.0	0.0	0.0	0.0	0.0	0.0	-1	0.0	0.0	0.0	0.0	0.0	0.0	0.0	0.0	0.0
214	215LEU	214	0.0	0.0	0.0	0.0	0.0	0.0	0.0	0.0	0.0	0.0	0.0	-1	0.0	0.0	0.0	0.0	0.0	0.0	0.0	0.0	0.0
215	216LEU	215	0.0	0.0	0.0	0.0	0.0	0.0	0.0	0.0	0.0	0.0	0.0	-1	0.0	0.0	0.0	0.0	0.0	0.0	0.0	0.0	0.0
216	217SER	216	0.0	0.0	0.0	0.0	0.0	0.0	0.0	0.0	0.0	0.0	0.0	-1	0.0	0.0	0.0	0.0	0.0	0.0	0.0	0.0	0.0
217	218SER	217	0.0	0.0	0.0	0.0	0.0	0.0	0.0	0.0	0.0	0.0	0.0	-1	0.0	0.0	0.0	0.0	0.0	0.0	0.0	0.0	0.0
218	219SER	218	0.0	0.0	0.0	0.0	0.0	0.0	0.0	0.0	0.0	0.0	0.0	-1	0.0	0.0	0.0	0.0	0.0	0.0	0.0	0.0	0.0
219	220ASP	219	0.0	0.0	0.0	0.0	0.0	0.0	0.0	0.0	0.0	0.0	0.0	-1	0.0	0.0	0.0	0.0	0.0	0.0	0.0	0.0	0.0
220	221PRO	220	0.0	0.0	0.0	0.0	0.0	0.0	0.0	0.0	0.0	0.0	0.0	-1	0.0	0.0	0.0	0.0	0.0	0.0	0.0	0.0	0.0
221	222ASN	221	0.0	0.0	0.0	0.0	0.0	0.0	0.0	0.0	0.0	0.0	0.0	-1	0.0	0.0	0.0	0.0	0.0	0.0	0.0	0.0	0.0
222	223GLY	222	0.0	0.0	0.0	0.0	0.0	0.0	0.0	0.0	0.0	0.0	0.0	-1	0.0	0.0	0.0	0.0	0.0	0.0	0.0	0.0	0.0
223	224ILE	223	0.0	0.0	0.0	0.0	0.0	0.0	0.0	0.0	0.0	0.0	0.0	-1	0.0	0.0	0.0	0.0	0.0	0.0	0.0	0.0	0.0
224	225CYS	224	0.0	0.0	0.0	0.0	0.0	0.0	0.0	0.0	0.0	0.0	0.0	-1	0.0	0.0	0.0	0.0	0.0	0.0	0.0	0.0	0.0
225	226PHE	225	0.0	0.0	0.0	0.0	0.0	0.0	0.0	0.0	0.0	0.0	0.0	-1	0.0	0.0	0.0	0.0	0.0	0.0	0.0	0.0	0.0
226	227ALA	226	0.0	0.0	0.0	0.0	0.0	0.0	0.0	0.0	0.0	0.0	0.0	-1	0.0	0.0	0.0	0.0	0.0	0.0	0.0	0.0	0.0
227	228GLU	227	0.0	0.0	0.0	0.0	0.0	0.0	0.0	0.0	0.0	0.0	0.0	-1	0.0	0.0	0.0	0.0	0.0	0.0	0.0	0.0	0.0
228	229THR	228	0.0	0.0	0.0	0.0	0.0	0.0	0.0	0.0	0.0	0.0	0.0	-1	0.0	0.0	0.0	0.0	0.0	0.0	0.0	0.0	0.0
229	230SER	229	0.0	0.0	0.0	0.0	0.0	0.0	0.0	0.0	0.0	0.0	0.0	-1	0.0	0.0	0.0	0.0	0.0	0.0	0.0	0.0	0.0
230	231SER	230	0.0	0.0	0.0	0.0	0.0	0.0	0.0	0.0	0.0	0.0	0.0	-1	0.0	0.0	0.0	0.0	0.0	0.0	0.0	0.0	0.0
231	232LEU	231	0.0	0.0	0.0	0.0	0.0	0.0	0.0	0.0	0.0	0.0	0.0	-1	0.0	0.0	0.0	0.0	0.0	0.0	0.0	0.0	0.0
232	233ASP	232	0.0	0.0	0.0	0.0	0.0	0.0	0.0	0.0	0.0	0.0	0.0	-1	0.0	0.0	0.0	0.0	0.0	0.0	0.0	0.0	0.0
233	234GLY	233	0.0	0.0	0.0	0.0	0.0	0.0	0.0	0.0	0.0	0.0	0.0	-1	0.0	0.0	0.0	0.0	0.0	0.0	0.0	0.0	0.0
234	235GLU	234	0.0	0.0	0.0	0.0	0.0	0.0	0.0	0.0	0.0	0.0	0.0	-1	0.0	0.0	0.0	0.0	0.0	0.0	0.0	0.0	0.0
235	236THR	235	0.0	0.0	0.0	0.0	0.0	0.0	0.0	0.0	0.0	0.0	0.0	-1	0.0	0.0	0.0	0.0	0.0	0.0	0.0	0.0	0.0
236	237ASN	236	0.0	0.0	0.0	0.0	0.0	0.0	0.0	0.0	0.0	0.0	0.0	-1	0.0	0.0	0.0	0.0	0.0	0.0	0.0	0.0	0.0
237	238LEU	237	0.0	0.0	0.0	0.0	0.0	0.0	0.0	0.0	0.0	0.0	0.0	-1	0.0	0.0	0.0	0.0	0.0	0.0	0.0	0.0	0.0
238	239LYS	238	0.0	0.0	0.0	0.0	0.0	0.0	0.0	0.0	0.0	0.0	0.0	-1	0.0	0.0	0.0	0.0	0.0	0.0	0.0	0.0	0.0
239	240VAL	239	0.0	0.0	0.0	0.0	0.0	0.0	0.0	0.0	0.0	0.0	0.0	-1	0.0	0.0	0.0	0.0	0.0	0.0	0.0	0.0	0.0
240	241LYS	240	0.0	0.0	0.0	0.0	0.0	0.0	0.0	0.0	0.0	0.0	0.0	-1	0.0	0.0	0.0	0.0	0.0	0.0	0.0	0.0	0.0
241	242GLU	241	0.0	0.0	0.0	0.0	0.0	0.0	0.0	0.0	0.0	0.0	0.0	-1	0.0	0.0	0.0	0.0	0.0	0.0	0.0	0.0	0.0
242	243VAL	242	0.0	0.0	0.0	0.0	0.0	0.0	0.0	0.0	0.0	0.0	0.0	-1	0.0	0.0	0.0	0.0	0.0	0.0	0.0	0.0	0.0
243	244ASN	243	0.0	0.0	0.0	0.0	0.0	0.0	0.0	0.0	0.0	0.0	0.0	-1	0.0	0.0	0.0	0.0	0.0	0.0	0.0	0.0	0.0
244	245LYS	244	0.0	0.0	0.0	0.0	0.0	0.0	0.0	0.0	0.0	0.0	0.0	-1	0.0	0.0	0.0	0.0	0.0	0.0	0.0	0.0	0.0
245	246TYR	245	0.0	0.0	0.0	0.0	0.0	0.0	0.0	0.0	0.0	0.0	0.0	-1	0.0	0.0	0.0	0.0	0.0	0.0	0.0	0.0	0.0
246	247ILE	246	0.0	0.0	0.0	0.0	0.0	0.0	0.0	0.0	0.0	0.0	0.0	-1	0.0	0.0	0.0	0.0	0.0	0.0	0.0	0.0	0.0
247	248PHE	247	0.0	0.0	0.0	0.0	0.0	0.0	0.0	0.0	0.0	0.0	0.0	-1	0.0	0.0	0.0	0.0	0.0	0.0	0.0	0.0	0.0
248	249ASN	248	0.0	0.0	0.0	0.0	0.0	0.0	0.0	0.0	0.0	0.0	0.0	-1	0.0	0.0	0.0	0.0	0.0	0.0	0.0	0.0	0.0
249	250ASN	249	0.0	0.0	0.0	0.0	0.0	0.0	0.0	0.0	0.0	0.0	0.0	-1	0.0	0.0	0.0	0.0	0.0	0.0	0.0	0.0	0.0
250	251LEU	250	0.0	0.0	0.0	0.0	0.0	0.0	0.0	0.0	0.0	0.0	0.0	-1	0.0	0.0	0.0	0.0	0.0	0.0	0.0	0.0	0.0
251	252THR	251	0.0	0.0	0.0	0.0	0.0	0.0	0.0	0.0	0.0	0.0	0.0	-1	0.0	0.0	0.0	0.0	0.0	0.0	0.0	0.0	0.0
252	253TYR	252	0.0	0.0	0.0	0.0	0.0	0.0	0.0	0.0	0.0	0.0	0.0	-1	0.0	0.0	0.0	0.0	0.0	0.0	0.0	0.0	0.0
253	254ASN	253	0.0	0.0	0.0	0.0	0.0	0.0	0.0	0.0	0.0	0.0	0.0	-1	0.0	0.0	0.0	0.0	0.0	0.0	0.0	0.0	0.0
254	255ILE	254	0.0	0.0	0.0	0.0	0.0	0.0	0.0	0.0	0.0	0.0	0.0	-1	0.0	0.0	0.0	0.0	0.0	0.0	0.0	0.0	0.0
255	256ASP	255	0.0	0.0	0.0	0.0	0.0	0.0	0.0	0.0	0.0	0.0	0.0	-1	0.0	0.0	0.0	0.0	0.0	0.0	0.0	0.0	0.0
256	257GLU	256	0.0	0.0	0.0	0.0	0.0	0.0	0.0	0.0	0.0	0.0	0.0	-1	0.0	0.0	0.0	0.0	0.0	0.0	0.0	0.0	0.0
257	258ALA	257	0.0	0.0	0.0	0.0	0.0	0.0	0.0	0.0	0.0	0.0	0.0	-1	0.0	0.0	0.0	0.0	0.0	0.0	0.0	0.0	0.0
258	259ILE	258	0.0	0.0	0.0	0.0	0.0	0.0	0.0	0.0	0.0	0.0	0.0	-1	0.0	0.0	0.0	0.0	0.0	0.0	0.0	0.0	0.0
259	260GLU	259	0.0	0.0	0.0	0.0	0.0	0.0	0.0	0.0	0.0	0.0	0.0	-1	0.0	0.0	0.0	0.0	0.0	0.0	0.0	0.0	0.0
260	261LYS	260	0.0	0.0	0.0	0.0	0.0	0.0	0.0	0.0	0.0	0.0	0.0	-1	0.0	0.0	0.0	0.0	0.0	0.0	0.0	0.0	0.0
261	262VAL	261	0.0	0.0	0.0	0.0	0.0	0.0	0.0	0.0	0.0	0.0	0.0	-1	0.0	0.0	0.0	0.0	0.0	0.0	0.0	0.0	0.0
262	263LYS	262	0.0	0.0	0.0	0.0	0.0	0.0	0.0	0.0	0.0	0.0	0.0	-1	0.0	0.0	0.0	0.0	0.0	0.0	0.0	0.0	0.0
263	264LYS	263	0.0	0.0	0.0	0.0	0.0	0.0	0.0	0.0	0.0	0.0	0.0	-1	0.0	0.0	0.0	0.0	0.0	0.0	0.0	0.0	0.0
264	265LEU	264	0.0	0.0	0.0	0.0	0.0	0.0	0.0	0.0	0.0	0.0	0.0	-1	0.0	0.0	0.0	0.0	0.0	0.0	0.0	0.0	0.0
265	266ARG	265	0.0	0.0	0.0	0.0	0.0	0.0	0.0	0.0	0.0	0.0	0.0	-1	0.0	0.0	0.0	0.0	0.0	0.0	0.0	0.0	0.0
266	267GLY	266	0.0	0.0	0.0	0.0	0.0	0.0	0.0	0.0	0.0	0.0	0.0	-1	0.0	0.0	0.0	0.0	0.0	0.0	0.0	0.0	0.0
267	268TYR	267	0.0	0.0	0.0	0.0	0.0	0.0	0.0	0.0	0.0	0.0	0.0	-1	0.0	0.0	0.0	0.0	0.0	0.0	0.0	0.0	0.0
268	269ILE	268	0.0	0.0	0.0	0.0	0.0	0.0	0.0	0.0	0.0	0.0	0.0	-1	0.0	0.0	0.0	0.0	0.0	0.0	0.0	0.0	0.0
269	270LEU	269	0.0	0.0	0.0	0.0	0.0	0.0	0.0	0.0	0.0	0.0	0.0	-1	0.0	0.0	0.0	0.0	0.0	0.0	0.0	0.0	0.0
270	271SER	270	0.0	0.0	0.0	0.0	0.0	0.0	0.0	0.0	0.0	0.0	0.0	-1	0.0	0.0	0.0	0.0	0.0	0.0	0.0	0.0	0.0
271	272GLU	271	0.0	0.0	0.0	0.0	0.0	0.0	0.0	0.0	0.0	0.0	0.0	-1	0.0	0.0	0.0	0.0	0.0	0.0	0.0	0.0	0.0
275	276LYS	275	0.0	0.0	0.0	0.0	0.0	0.0	0.0	0.0	0.0	0.0	0.0	-1	0.0	0.0	0.0	0.0	0.0	0.0	0.0	0.0	0.0
276	277ASN	276	0.0	0.0	0.0	0.0	0.0	0.0	0.0	0.0	0.0	0.0	0.0	-1	0.0	0.0	0.0	0.0	0.0	0.0	0.0	0.0	0.0
277	278LEU	277	0.0	0.0	0.0	0.0	0.0	0.0	0.0	0.0	0.0	0.0	0.0	-1	0.0	0.0	0.0	0.0	0.0	0.0	0.0	0.0	0.0
278	279SER	278	0.0	0.0	0.0	0.0	0.0	0.0	0.0	0.0	0.0	0.0	0.0	-1	0.0	0.0	0.0	0.0	0.0	0.0	0.0	0.0	0.0
279	280THR	279	0.0	0.0	0.0	0.0	0.0	0.0	0.0	0.0	0.0	0.0	0.0	-1	0.0	0.0	0.0	0.0	0.0	0.0	0.0	0.0	0.0
280	281MET	280	0.0	0.0	0.0	0.0	0.0	0.0	0.0	0.0	0.0	0.0	0.0	-1	0.0	0.0	0.0	0.0	0.0	0.0	0.0	0.0	0.0
281	282ASN	281	0.0	0.0	0.0	0.0	0.0	0.0	0.0	0.0	0.0	0.0	0.0	-1	0.0	0.0	0.0	0.0	0.0	0.0	0.0	0.0	0.0
282	283GLY	282	0.0	0.0	0.0	0.0	0.0	0.0	0.0	0.0	0.0	0.0	0.0	-1	0.0	0.0	0.0	0.0	0.0	0.0	0.0	0.0	0.0
283	284ALA	283	0.0	0.0	0.0	0.0	0.0	0.0	0.0	0.0	0.0	0.0	0.0	-1	0.0	0.0	0.0	0.0	0.0	0.0	0.0	0.0	0.0
284	285ILE	284	0.0	0.0	0.0	0.0	0.0	0.0	0.0	0.0	0.0	0.0	0.0	-1	0.0	0.0	0.0	0.0	0.0	0.0	0.0	0.0	0.0
285	286TYR	285	0.0	0.0	0.0	0.0	0.0	0.0	0.0	0.0	0.0	0.0	0.0	-1	0.0	0.0	0.0	0.0	0.0	0.0	0.0	0.0	0.0
286	287LEU	286	0.0	0.0	0.0	0.0	0.0	0.0	0.0	0.0	0.0	0.0	0.0	-1	0.0	0.0	0.0	0.0	0.0	0.0	0.0	0.0	0.0
287	288GLU	287	0.0	0.0	0.0	0.0	0.0	0.0	0.0	0.0	0.0	0.0	0.0	-1	0.0	0.0	0.0	0.0	0.0	0.0	0.0	0.0	0.0
288	289SER	288	0.0	0.0	0.0	0.0	0.0	0.0	0.0	0.0	0.0	0.0	0.0	-1	0.0	0.0	0.0	0.0	0.0	0.0	0.0	0.0	0.0
289	290ASP	289	0.0	0.0	0.0	0.0	0.0	0.0	0.0	0.0	0.0	0.0	0.0	-1	0.0	0.0	0.0	0.0	0.0	0.0	0.0	0.0	0.0
290	291GLU	290	0.0	0.0	0.0	0.0	0.0	0.0	0.0	0.0	0.0	0.0	0.0	-1	0.0	0.0	0.0	0.0	0.0	0.0	0.0	0.0	0.0
291	292ASN	291	0.0	0.0	0.0	0.0	0.0	0.0	0.0	0.0	0.0	0.0	0.0	-1	0.0	0.0	0.0	0.0	0.0	0.0	0.0	0.0	0.0
292	293ASN	292	0.0	0.0	0.0	0.0	0.0	0.0	0.0	0.0	0.0	0.0	0.0	-1	0.0	0.0	0.0	0.0	0.0	0.0	0.0	0.0	0.0
293	294ASP	293	0.0	0.0	0.0	0.0	0.0	0.0	0.0	0.0	0.0	0.0	0.0	-1	0.0	0.0	0.0	0.0	0.0	0.0	0.0	0.0	0.0
294	295LEU	294	0.0	0.0	0.0	0.0	0.0	0.0	0.0	0.0	0.0	0.0	0.0	-1	0.0	0.0	0.0	0.0	0.0	0.0	0.0	0.0	0.0
295	296THR	295	0.0	0.0	0.0	0.0	0.0	0.0	0.0	0.0	0.0	0.0	0.0	-1	0.0	0.0	0.0	0.0	0.0	0.0	0.0	0.0	0.0
296	297ASN	296	0.0	0.0	0.0	0.0	0.0	0.0	0.0	0.0	0.0	0.0	0.0	-1	0.0	0.0	0.0	0.0	0.0	0.0	0.0	0.0	0.0
297	298ASN	297	0.0	0.0	0.0	0.0	0.0	0.0	0.0	0.0	0.0	0.0	0.0	-1	0.0	0.0	0.0	0.0	0.0	0.0	0.0	0.0	0.0
298	299LYS	298	0.0	0.0	0.0	0.0	0.0	0.0	0.0	0.0	0.0	0.0	0.0	-1	0.0	0.0	0.0	0.0	0.0	0.0	0.0	0.0	0.0
299	300GLU	299	0.0	0.0	0.0	0.0	0.0	0.0	0.0	0.0	0.0	0.0	0.0	-1	0.0	0.0	0.0	0.0	0.0	0.0	0.0	0.0	0.0
300	301LEU	300	0.0	0.0	0.0	0.0	0.0	0.0	0.0	0.0	0.0	0.0	0.0	-1	0.0	0.0	0.0	0.0	0.0	0.0	0.0	0.0	0.0
301	302ARG	301	0.0	0.0	0.0	0.0	0.0	0.0	0.0	0.0	0.0	0.0	0.0	-1	0.0	0.0	0.0	0.0	0.0	0.0	0.0	0.0	0.0
302	303LYS	302	0.0	0.0	0.0	0.0	0.0	0.0	0.0	0.0	0.0	0.0	0.0	-1	0.0	0.0	0.0	0.0	0.0	0.0	0.0	0.0	0.0
303	304SER	303	0.0	0.0	0.0	0.0	0.0	0.0	0.0	0.0	0.0	0.0	0.0	-1	0.0	0.0	0.0	0.0	0.0	0.0	0.0	0.0	0.0
304	305ILE	304	0.0	0.0	0.0	0.0	0.0	0.0	0.0	0.0	0.0	0.0	0.0	-1	0.0	0.0	0.0	0.0	0.0	0.0	0.0	0.0	0.0
305	306SER	305	0.0	0.0	0.0	0.0	0.0	0.0	0.0	0.0	0.0	0.0	0.0	-1	0.0	0.0	0.0	0.0	0.0	0.0	0.0	0.0	0.0
306	307GLY	306	0.0	0.0	0.0	0.0	0.0	0.0	0.0	0.0	0.0	0.0	0.0	-1	0.0	0.0	0.0	0.0	0.0	0.0	0.0	0.0	0.0
307	308GLY	307	0.0	0.0	0.0	0.0	0.0	0.0	0.0	0.0	0.0	0.0	0.0	-1	0.0	0.0	0.0	0.0	0.0	0.0	0.0	0.0	0.0
308	309THR	308	0.0	0.0	0.0	0.0	0.0	0.0	0.0	0.0	0.0	0.0	0.0	-1	0.0	0.0	0.0	0.0	0.0	0.0	0.0	0.0	0.0
309	310SER	309	0.0	0.0	0.0	0.0	0.0	0.0	0.0	0.0	0.0	0.0	0.0	-1	0.0	0.0	0.0	0.0	0.0	0.0	0.0	0.0	0.0
310	311HIS	310	0.0	0.0	0.0	0.0	0.0	0.0	0.0	0.0	0.0	0.0	0.0	-1	0.0	0.0	0.0	0.0	0.0	0.0	0.0	0.0	0.0
311	312GLY	311	0.0	0.0	0.0	0.0	0.0	0.0	0.0	0.0	0.0	0.0	0.0	-1	0.0	0.0	0.0	0.0	0.0	0.0	0.0	0.0	0.0
312	313GLU	312	0.0	0.0	0.0	0.0	0.0	0.0	0.0	0.0	0.0	0.0	0.0	-1	0.0	0.0	0.0	0.0	0.0	0.0	0.0	0.0	0.0
313	314GLY	313	0.0	0.0	0.0	0.0	0.0	0.0	0.0	0.0	0.0	0.0	0.0	-1	0.0	0.0	0.0	0.0	0.0	0.0	0.0	0.0	0.0
314	315MET	314	0.0	0.0	0.0	0.0	0.0	0.0	0.0	0.0	0.0	0.0	0.0	-1	0.0	0.0	0.0	0.0	0.0	0.0	0.0	0.0	0.0
315	316LYS	315	0.0	0.0	0.0	0.0	0.0	0.0	0.0	0.0	0.0	0.0	0.0	-1	0.0	0.0	0.0	0.0	0.0	0.0	0.0	0.0	0.0
316	317ASN	316	0.0	0.0	0.0	0.0	0.0	0.0	0.0	0.0	0.0	0.0	0.0	-1	0.0	0.0	0.0	0.0	0.0	0.0	0.0	0.0	0.0
317	318ASN	317	0.0	0.0	0.0	0.0	0.0	0.0	0.0	0.0	0.0	0.0	0.0	-1	0.0	0.0	0.0	0.0	0.0	0.0	0.0	0.0	0.0
318	319ASN	318	0.0	0.0	0.0	0.0	0.0	0.0	0.0	0.0	0.0	0.0	0.0	-1	0.0	0.0	0.0	0.0	0.0	0.0	0.0	0.0	0.0
319	320SER	319	0.0	0.0	0.0	0.0	0.0	0.0	0.0	0.0	0.0	0.0	0.0	-1	0.0	0.0	0.0	0.0	0.0	0.0	0.0	0.0	0.0
320	321ILE	320	0.0	0.0	0.0	0.0	0.0	0.0	0.0	0.0	0.0	0.0	0.0	-1	0.0	0.0	0.0	0.0	0.0	0.0	0.0	0.0	0.0
321	322GLU	321	0.0	0.0	0.0	0.0	0.0	0.0	0.0	0.0	0.0	0.0	0.0	-1	0.0	0.0	0.0	0.0	0.0	0.0	0.0	0.0	0.0
322	323ASN	322	0.0	0.0	0.0	0.0	0.0	0.0	0.0	0.0	0.0	0.0	0.0	-1	0.0	0.0	0.0	0.0	0.0	0.0	0.0	0.0	0.0
323	324ASN	323	0.0	0.0	0.0	0.0	0.0	0.0	0.0	0.0	0.0	0.0	0.0	-1	0.0	0.0	0.0	0.0	0.0	0.0	0.0	0.0	0.0
324	325SER	324	0.0	0.0	0.0	0.0	0.0	0.0	0.0	0.0	0.0	0.0	0.0	-1	0.0	0.0	0.0	0.0	0.0	0.0	0.0	0.0	0.0
328	329LEU	328	0.0	0.0	0.0	0.0	0.0	0.0	0.0	0.0	0.0	0.0	0.0	-1	0.0	0.0	0.0	0.0	0.0	0.0	0.0	0.0	0.0
329	330ASP	329	0.0	0.0	0.0	0.0	0.0	0.0	0.0	0.0	0.0	0.0	0.0	-1	0.0	0.0	0.0	0.0	0.0	0.0	0.0	0.0	0.0
333	334ASN	333	0.0	0.0	0.0	0.0	0.0	0.0	0.0	0.0	0.0	0.0	0.0	-1	0.0	0.0	0.0	0.0	0.0	0.0	0.0	0.0	0.0
334	335ASP	334	0.0	0.0	0.0	0.0	0.0	0.0	0.0	0.0	0.0	0.0	0.0	-1	0.0	0.0	0.0	0.0	0.0	0.0	0.0	0.0	0.0
335	336ASP	335	0.0	0.0	0.0	0.0	0.0	0.0	0.0	0.0	0.0	0.0	0.0	-1	0.0	0.0	0.0	0.0	0.0	0.0	0.0	0.0	0.0
336	337LYS	336	0.0	0.0	0.0	0.0	0.0	0.0	0.0	0.0	0.0	0.0	0.0	-1	0.0	0.0	0.0	0.0	0.0	0.0	0.0	0.0	0.0
337	338TYR	337	0.0	0.0	0.0	0.0	0.0	0.0	0.0	0.0	0.0	0.0	0.0	-1	0.0	0.0	0.0	0.0	0.0	0.0	0.0	0.0	0.0
338	339VAL	338	0.0	0.0	0.0	0.0	0.0	0.0	0.0	0.0	0.0	0.0	0.0	-1	0.0	0.0	0.0	0.0	0.0	0.0	0.0	0.0	0.0
339	340LYS	339	0.0	0.0	0.0	0.0	0.0	0.0	0.0	0.0	0.0	0.0	0.0	-1	0.0	0.0	0.0	0.0	0.0	0.0	0.0	0.0	0.0
340	341LEU	340	0.0	0.0	0.0	0.0	0.0	0.0	0.0	0.0	0.0	0.0	0.0	-1	0.0	0.0	0.0	0.0	0.0	0.0	0.0	0.0	0.0
341	342PRO	341	0.0	0.0	0.0	0.0	0.0	0.0	0.0	0.0	0.0	0.0	0.0	-1	0.0	0.0	0.0	0.0	0.0	0.0	0.0	0.0	0.0
342	343PHE	342	0.0	0.0	0.0	0.0	0.0	0.0	0.0	0.0	0.0	0.0	0.0	-1	0.0	0.0	0.0	0.0	0.0	0.0	0.0	0.0	0.0
343	344ASP	343	0.0	0.0	0.0	0.0	0.0	0.0	0.0	0.0	0.0	0.0	0.0	-1	0.0	0.0	0.0	0.0	0.0	0.0	0.0	0.0	0.0
344	345GLU	344	0.0	0.0	0.0	0.0	0.0	0.0	0.0	0.0	0.0	0.0	0.0	-1	0.0	0.0	0.0	0.0	0.0	0.0	0.0	0.0	0.0
345	346LYS	345	0.0	0.0	0.0	0.0	0.0	0.0	0.0	0.0	0.0	0.0	0.0	-1	0.0	0.0	0.0	0.0	0.0	0.0	0.0	0.0	0.0
346	347ASN	346	0.0	0.0	0.0	0.0	0.0	0.0	0.0	0.0	0.0	0.0	0.0	-1	0.0	0.0	0.0	0.0	0.0	0.0	0.0	0.0	0.0
347	348PHE	347	0.0	0.0	0.0	0.0	0.0	0.0	0.0	0.0	0.0	0.0	0.0	-1	0.0	0.0	0.0	0.0	0.0	0.0	0.0	0.0	0.0
348	349VAL	348	0.0	0.0	0.0	0.0	0.0	0.0	0.0	0.0	0.0	0.0	0.0	-1	0.0	0.0	0.0	0.0	0.0	0.0	0.0	0.0	0.0
349	350LEU	349	0.0	0.0	0.0	0.0	0.0	0.0	0.0	0.0	0.0	0.0	0.0	-1	0.0	0.0	0.0	0.0	0.0	0.0	0.0	0.0	0.0
350	351ARG	350	0.0	0.0	0.0	0.0	0.0	0.0	0.0	0.0	0.0	0.0	0.0	-1	0.0	0.0	0.0	0.0	0.0	0.0	0.0	0.0	0.0
351	352GLY	351	0.0	0.0	0.0	0.0	0.0	0.0	0.0	0.0	0.0	0.0	0.0	-1	0.0	0.0	0.0	0.0	0.0	0.0	0.0	0.0	0.0
352	353CYS	352	0.0	0.0	0.0	0.0	0.0	0.0	0.0	0.0	0.0	0.0	0.0	-1	0.0	0.0	0.0	0.0	0.0	0.0	0.0	0.0	0.0
353	354LYS	353	0.0	0.0	0.0	0.0	0.0	0.0	0.0	0.0	0.0	0.0	0.0	-1	0.0	0.0	0.0	0.0	0.0	0.0	0.0	0.0	0.0
354	355LEU	354	0.0	0.0	0.0	0.0	0.0	0.0	0.0	0.0	0.0	0.0	0.0	-1	0.0	0.0	0.0	0.0	0.0	0.0	0.0	0.0	0.0
355	356LYS	355	0.0	0.0	0.0	0.0	0.0	0.0	0.0	0.0	0.0	0.0	0.0	-1	0.0	0.0	0.0	0.0	0.0	0.0	0.0	0.0	0.0
356	357ASN	356	0.0	0.0	0.0	0.0	0.0	0.0	0.0	0.0	0.0	0.0	0.0	-1	0.0	0.0	0.0	0.0	0.0	0.0	0.0	0.0	0.0
357	358ILE	357	0.0	0.0	0.0	0.0	0.0	0.0	0.0	0.0	0.0	0.0	0.0	-1	0.0	0.0	0.0	0.0	0.0	0.0	0.0	0.0	0.0
358	359ASP	358	0.0	0.0	0.0	0.0	0.0	0.0	0.0	0.0	0.0	0.0	0.0	-1	0.0	0.0	0.0	0.0	0.0	0.0	0.0	0.0	0.0
359	360TRP	359	0.0	0.0	0.0	0.0	0.0	0.0	0.0	0.0	0.0	0.0	0.0	-1	0.0	0.0	0.0	0.0	0.0	0.0	0.0	0.0	0.0
360	361VAL	360	0.0	0.0	0.0	0.0	0.0	0.0	0.0	0.0	0.0	0.0	0.0	-1	0.0	0.0	0.0	0.0	0.0	0.0	0.0	0.0	0.0
361	362ILE	361	0.0	0.0	0.0	0.0	0.0	0.0	0.0	0.0	0.0	0.0	0.0	-1	0.0	0.0	0.0	0.0	0.0	0.0	0.0	0.0	0.0
362	363GLY	362	0.0	0.0	0.0	0.0	0.0	0.0	0.0	0.0	0.0	0.0	0.0	-1	0.0	0.0	0.0	0.0	0.0	0.0	0.0	0.0	0.0
363	364MET	363	0.0	0.0	0.0	0.0	0.0	0.0	0.0	0.0	0.0	0.0	0.0	-1	0.0	0.0	0.0	0.0	0.0	0.0	0.0	0.0	0.0
364	365ALA	364	0.0	0.0	0.0	0.0	0.0	0.0	0.0	0.0	0.0	0.0	0.0	-1	0.0	0.0	0.0	0.0	0.0	0.0	0.0	0.0	0.0
365	366ILE	365	0.0	0.0	0.0	0.0	0.0	0.0	0.0	0.0	0.0	0.0	0.0	-1	0.0	0.0	0.0	0.0	0.0	0.0	0.0	0.0	0.0
366	367TYR	366	0.0	0.0	0.0	0.0	0.0	0.0	0.0	0.0	0.0	0.0	0.0	-1	0.0	0.0	0.0	0.0	0.0	0.0	0.0	0.0	0.0
367	368ILE	367	0.0	0.0	0.0	0.0	0.0	0.0	0.0	0.0	0.0	0.0	0.0	-1	0.0	0.0	0.0	0.0	0.0	0.0	0.0	0.0	0.0
368	369GLY	368	0.0	0.0	0.0	0.0	0.0	0.0	0.0	0.0	0.0	0.0	0.0	-1	0.0	0.0	0.0	0.0	0.0	0.0	0.0	0.0	0.0
371	372THR	371	0.0	0.0	0.0	0.0	0.0	0.0	0.0	0.0	0.0	0.0	0.0	-1	0.0	0.0	0.0	0.0	0.0	0.0	0.0	0.0	0.0
372	373LYS	372	0.0	0.0	0.0	0.0	0.0	0.0	0.0	0.0	0.0	0.0	0.0	-1	0.0	0.0	0.0	0.0	0.0	0.0	0.0	0.0	0.0
373	374ILE	373	0.0	0.0	0.0	0.0	0.0	0.0	0.0	0.0	0.0	0.0	0.0	-1	0.0	0.0	0.0	0.0	0.0	0.0	0.0	0.0	0.0
374	375GLN	374	0.0	0.0	0.0	0.0	0.0	0.0	0.0	0.0	0.0	0.0	0.0	-1	0.0	0.0	0.0	0.0	0.0	0.0	0.0	0.0	0.0
376	377ASN	376	0.0	0.0	0.0	0.0	0.0	0.0	0.0	0.0	0.0	0.0	0.0	-1	0.0	0.0	0.0	0.0	0.0	0.0	0.0	0.0	0.0
377	378SER	377	0.01	0.0	0.03998400639744103	0.0	1.0	0.0	0.0	0.0	-0.00040016006402532334	0.0	-0.00040016006402532334	-1	0.0	0.0	0.0	0.0	0.0	0.0	0.0	0.0	0.0
378	379LEU	378	0.01	0.0	0.11995201919232307	0.0	1.0	0.0	0.0	0.0	-0.00040016006402532334	0.0	-0.00040016006402532334	-1	0.0	0.0	0.0	0.0	0.0	0.0	0.0	0.0	0.0
387	388LEU	387	0.0	0.0	0.0	0.0	0.0	0.0	0.0	0.0	0.0	0.0	0.0	-1	0.0	0.0	0.0	0.0	0.0	0.0	0.0	0.0	0.0
390	391LEU	390	0.0	0.0	0.0	0.0	0.0	0.0	0.0	0.0	0.0	0.0	0.0	-1	0.0	0.0	0.0	0.0	0.0	0.0	0.0	0.0	0.0
391	392THR	391	0.0	0.0	0.0	0.0	0.0	0.0	0.0	0.0	0.0	0.0	0.0	-1	0.0	0.0	0.0	0.0	0.0	0.0	0.0	0.0	0.0
410	411ALA	410	0.0	0.0	0.0	0.0	0.0	0.0	0.0	0.0	0.0	0.0	0.0	-1	0.0	0.0	0.0	0.0	0.0	0.0	0.0	0.0	0.0
417	418VAL	417	0.0	0.0	0.0	0.0	0.0	0.0	0.0	0.0	0.0	0.0	0.0	-1	0.0	0.0	0.0	0.0	0.0	0.0	0.0	0.0	0.0
445	446SER	445	0.0	0.0	0.0	0.0	0.0	0.0	0.0	0.0	0.0	0.0	0.0	-1	0.0	0.0	0.0	0.0	0.0	0.0	0.0	0.0	0.0
448	449SER	448	0.0	0.0	0.0	0.0	0.0	0.0	0.0	0.0	0.0	0.0	0.0	-1	0.0	0.0	0.0	0.0	0.0	0.0	0.0	0.0	0.0
449	450TRP	449	0.0	0.0	0.0	0.0	0.0	0.0	0.0	0.0	0.0	0.0	0.0	-1	0.0	0.0	0.0	0.0	0.0	0.0	0.0	0.0	0.0
452	453ILE	452	0.0	0.0	0.0	0.0	0.0	0.0	0.0	0.0	0.0	0.0	0.0	-1	0.0	0.0	0.0	0.0	0.0	0.0	0.0	0.0	0.0
453	454THR	453	0.0	0.0	0.0	0.0	0.0	0.0	0.0	0.0	0.0	0.0	0.0	-1	0.0	0.0	0.0	0.0	0.0	0.0	0.0	0.0	0.0
454	455ALA	454	0.0	0.0	0.0	0.0	0.0	0.0	0.0	0.0	0.0	0.0	0.0	-1	0.0	0.0	0.0	0.0	0.0	0.0	0.0	0.0	0.0
455	456ASN	455	0.0	0.0	0.0	0.0	0.0	0.0	0.0	0.0	0.0	0.0	0.0	-1	0.0	0.0	0.0	0.0	0.0	0.0	0.0	0.0	0.0
457	458ILE	457	0.0	0.0	0.0	0.0	0.0	0.0	0.0	0.0	0.0	0.0	0.0	-1	0.0	0.0	0.0	0.0	0.0	0.0	0.0	0.0	0.0
458	459PRO	458	0.0	0.0	0.0	0.0	0.0	0.0	0.0	0.0	0.0	0.0	0.0	-1	0.0	0.0	0.0	0.0	0.0	0.0	0.0	0.0	0.0
459	460ILE	459	0.0	0.0	0.0	0.0	0.0	0.0	0.0	0.0	0.0	0.0	0.0	-1	0.0	0.0	0.0	0.0	0.0	0.0	0.0	0.0	0.0
460	461CYS	460	0.0	0.0	0.0	0.0	0.0	0.0	0.0	0.0	0.0	0.0	0.0	-1	0.0	0.0	0.0	0.0	0.0	0.0	0.0	0.0	0.0
461	462LEU	461	0.0	0.0	0.0	0.0	0.0	0.0	0.0	0.0	0.0	0.0	0.0	-1	0.0	0.0	0.0	0.0	0.0	0.0	0.0	0.0	0.0
462	463ILE	462	0.0	0.0	0.0	0.0	0.0	0.0	0.0	0.0	0.0	0.0	0.0	-1	0.0	0.0	0.0	0.0	0.0	0.0	0.0	0.0	0.0
463	464VAL	463	0.0	0.0	0.0	0.0	0.0	0.0	0.0	0.0	0.0	0.0	0.0	-1	0.0	0.0	0.0	0.0	0.0	0.0	0.0	0.0	0.0
464	465THR	464	0.0	0.0	0.0	0.0	0.0	0.0	0.0	0.0	0.0	0.0	0.0	-1	0.0	0.0	0.0	0.0	0.0	0.0	0.0	0.0	0.0
465	466MET	465	0.0	0.0	0.0	0.0	0.0	0.0	0.0	0.0	0.0	0.0	0.0	-1	0.0	0.0	0.0	0.0	0.0	0.0	0.0	0.0	0.0
467	468CYS	467	0.0	0.0	0.0	0.0	0.0	0.0	0.0	0.0	0.0	0.0	0.0	-1	0.0	0.0	0.0	0.0	0.0	0.0	0.0	0.0	0.0
468	469VAL	468	0.0	0.0	0.0	0.0	0.0	0.0	0.0	0.0	0.0	0.0	0.0	-1	0.0	0.0	0.0	0.0	0.0	0.0	0.0	0.0	0.0
469	470LYS	469	0.0	0.0	0.0	0.0	0.0	0.0	0.0	0.0	0.0	0.0	0.0	-1	0.0	0.0	0.0	0.0	0.0	0.0	0.0	0.0	0.0
470	471VAL	470	0.0	0.0	0.0	0.0	0.0	0.0	0.0	0.0	0.0	0.0	0.0	-1	0.0	0.0	0.0	0.0	0.0	0.0	0.0	0.0	0.0
471	472ILE	471	0.0	0.0	0.0	0.0	0.0	0.0	0.0	0.0	0.0	0.0	0.0	-1	0.0	0.0	0.0	0.0	0.0	0.0	0.0	0.0	0.0
472	473GLN	472	0.0	0.0	0.0	0.0	0.0	0.0	0.0	0.0	0.0	0.0	0.0	-1	0.0	0.0	0.0	0.0	0.0	0.0	0.0	0.0	0.0
473	474ALA	473	0.0	0.0	0.0	0.0	0.0	0.0	0.0	0.0	0.0	0.0	0.0	-1	0.0	0.0	0.0	0.0	0.0	0.0	0.0	0.0	0.0
474	475TYR	474	0.0	0.0	0.0	0.0	0.0	0.0	0.0	0.0	0.0	0.0	0.0	-1	0.0	0.0	0.0	0.0	0.0	0.0	0.0	0.0	0.0
475	476PHE	475	0.0	0.0	0.0	0.0	0.0	0.0	0.0	0.0	0.0	0.0	0.0	-1	0.0	0.0	0.0	0.0	0.0	0.0	0.0	0.0	0.0
476	477ILE	476	0.0	0.0	0.0	0.0	0.0	0.0	0.0	0.0	0.0	0.0	0.0	-1	0.0	0.0	0.0	0.0	0.0	0.0	0.0	0.0	0.0
477	478SER	477	0.0	0.0	0.0	0.0	0.0	0.0	0.0	0.0	0.0	0.0	0.0	-1	0.0	0.0	0.0	0.0	0.0	0.0	0.0	0.0	0.0
478	479CYS	478	0.0	0.0	0.0	0.0	0.0	0.0	0.0	0.0	0.0	0.0	0.0	-1	0.0	0.0	0.0	0.0	0.0	0.0	0.0	0.0	0.0
479	480ASP	479	0.0	0.0	0.0	0.0	0.0	0.0	0.0	0.0	0.0	0.0	0.0	-1	0.0	0.0	0.0	0.0	0.0	0.0	0.0	0.0	0.0
480	481ASN	480	0.0	0.0	0.0	0.0	0.0	0.0	0.0	0.0	0.0	0.0	0.0	-1	0.0	0.0	0.0	0.0	0.0	0.0	0.0	0.0	0.0
481	482ASN	481	0.0	0.0	0.0	0.0	0.0	0.0	0.0	0.0	0.0	0.0	0.0	-1	0.0	0.0	0.0	0.0	0.0	0.0	0.0	0.0	0.0
482	483MET	482	0.0	0.0	0.0	0.0	0.0	0.0	0.0	0.0	0.0	0.0	0.0	-1	0.0	0.0	0.0	0.0	0.0	0.0	0.0	0.0	0.0
483	484ILE	483	0.0	0.0	0.0	0.0	0.0	0.0	0.0	0.0	0.0	0.0	0.0	-1	0.0	0.0	0.0	0.0	0.0	0.0	0.0	0.0	0.0
484	485TYR	484	0.0	0.0	0.0	0.0	0.0	0.0	0.0	0.0	0.0	0.0	0.0	-1	0.0	0.0	0.0	0.0	0.0	0.0	0.0	0.0	0.0
485	486LYS	485	0.0	0.0	0.0	0.0	0.0	0.0	0.0	0.0	0.0	0.0	0.0	-1	0.0	0.0	0.0	0.0	0.0	0.0	0.0	0.0	0.0
486	487VAL	486	0.0	0.0	0.0	0.0	0.0	0.0	0.0	0.0	0.0	0.0	0.0	-1	0.0	0.0	0.0	0.0	0.0	0.0	0.0	0.0	0.0
487	488GLU	487	0.0	0.0	0.0	0.0	0.0	0.0	0.0	0.0	0.0	0.0	0.0	-1	0.0	0.0	0.0	0.0	0.0	0.0	0.0	0.0	0.0
488	489GLU	488	0.0	0.0	0.0	0.0	0.0	0.0	0.0	0.0	0.0	0.0	0.0	-1	0.0	0.0	0.0	0.0	0.0	0.0	0.0	0.0	0.0
489	490ASN	489	0.0	0.0	0.0	0.0	0.0	0.0	0.0	0.0	0.0	0.0	0.0	-1	0.0	0.0	0.0	0.0	0.0	0.0	0.0	0.0	0.0
490	491ILE	490	0.0	0.0	0.0	0.0	0.0	0.0	0.0	0.0	0.0	0.0	0.0	-1	0.0	0.0	0.0	0.0	0.0	0.0	0.0	0.0	0.0
491	492PRO	491	0.0	0.0	0.0	0.0	0.0	0.0	0.0	0.0	0.0	0.0	0.0	-1	0.0	0.0	0.0	0.0	0.0	0.0	0.0	0.0	0.0
492	493SER	492	0.0	0.0	0.0	0.0	0.0	0.0	0.0	0.0	0.0	0.0	0.0	-1	0.0	0.0	0.0	0.0	0.0	0.0	0.0	0.0	0.0
493	494PHE	493	0.0	0.0	0.0	0.0	0.0	0.0	0.0	0.0	0.0	0.0	0.0	-1	0.0	0.0	0.0	0.0	0.0	0.0	0.0	0.0	0.0
494	495GLY	494	0.0	0.0	0.0	0.0	0.0	0.0	0.0	0.0	0.0	0.0	0.0	-1	0.0	0.0	0.0	0.0	0.0	0.0	0.0	0.0	0.0
495	496GLU	495	0.0	0.0	0.0	0.0	0.0	0.0	0.0	0.0	0.0	0.0	0.0	-1	0.0	0.0	0.0	0.0	0.0	0.0	0.0	0.0	0.0
496	497SER	496	0.0	0.0	0.0	0.0	0.0	0.0	0.0	0.0	0.0	0.0	0.0	-1	0.0	0.0	0.0	0.0	0.0	0.0	0.0	0.0	0.0
497	498ARG	497	0.0	0.0	0.0	0.0	0.0	0.0	0.0	0.0	0.0	0.0	0.0	-1	0.0	0.0	0.0	0.0	0.0	0.0	0.0	0.0	0.0
498	499GLN	498	0.0	0.0	0.0	0.0	0.0	0.0	0.0	0.0	0.0	0.0	0.0	-1	0.0	0.0	0.0	0.0	0.0	0.0	0.0	0.0	0.0
499	500LYS	499	0.0	0.0	0.0	0.0	0.0	0.0	0.0	0.0	0.0	0.0	0.0	-1	0.0	0.0	0.0	0.0	0.0	0.0	0.0	0.0	0.0
500	501SER	500	0.0	0.0	0.0	0.0	0.0	0.0	0.0	0.0	0.0	0.0	0.0	-1	0.0	0.0	0.0	0.0	0.0	0.0	0.0	0.0	0.0
501	502MET	501	0.0	0.0	0.0	0.0	0.0	0.0	0.0	0.0	0.0	0.0	0.0	-1	0.0	0.0	0.0	0.0	0.0	0.0	0.0	0.0	0.0
503	504LEU	503	0.0	0.0	0.0	0.0	0.0	0.0	0.0	0.0	0.0	0.0	0.0	-1	0.0	0.0	0.0	0.0	0.0	0.0	0.0	0.0	0.0
504	505LYS	504	0.0	0.0	0.0	0.0	0.0	0.0	0.0	0.0	0.0	0.0	0.0	-1	0.0	0.0	0.0	0.0	0.0	0.0	0.0	0.0	0.0
506	507ASN	506	0.0	0.0	0.0	0.0	0.0	0.0	0.0	0.0	0.0	0.0	0.0	-1	0.0	0.0	0.0	0.0	0.0	0.0	0.0	0.0	0.0
507	508VAL	507	0.0	0.0	0.0	0.0	0.0	0.0	0.0	0.0	0.0	0.0	0.0	-1	0.0	0.0	0.0	0.0	0.0	0.0	0.0	0.0	0.0
508	509SER	508	0.0	0.0	0.0	0.0	0.0	0.0	0.0	0.0	0.0	0.0	0.0	-1	0.0	0.0	0.0	0.0	0.0	0.0	0.0	0.0	0.0
509	510ILE	509	0.0	0.0	0.0	0.0	0.0	0.0	0.0	0.0	0.0	0.0	0.0	-1	0.0	0.0	0.0	0.0	0.0	0.0	0.0	0.0	0.0
510	511GLU	510	0.0	0.0	0.0	0.0	0.0	0.0	0.0	0.0	0.0	0.0	0.0	-1	0.0	0.0	0.0	0.0	0.0	0.0	0.0	0.0	0.0
511	512ILE	511	0.0	0.0	0.0	0.0	0.0	0.0	0.0	0.0	0.0	0.0	0.0	-1	0.0	0.0	0.0	0.0	0.0	0.0	0.0	0.0	0.0
512	513ASP	512	0.0	0.0	0.0	0.0	0.0	0.0	0.0	0.0	0.0	0.0	0.0	-1	0.0	0.0	0.0	0.0	0.0	0.0	0.0	0.0	0.0
513	514GLU	513	0.0	0.0	0.0	0.0	0.0	0.0	0.0	0.0	0.0	0.0	0.0	-1	0.0	0.0	0.0	0.0	0.0	0.0	0.0	0.0	0.0
514	515ILE	514	0.0	0.0	0.0	0.0	0.0	0.0	0.0	0.0	0.0	0.0	0.0	-1	0.0	0.0	0.0	0.0	0.0	0.0	0.0	0.0	0.0
515	516HIS	515	0.0	0.0	0.0	0.0	0.0	0.0	0.0	0.0	0.0	0.0	0.0	-1	0.0	0.0	0.0	0.0	0.0	0.0	0.0	0.0	0.0
516	517ASN	516	0.0	0.0	0.0	0.0	0.0	0.0	0.0	0.0	0.0	0.0	0.0	-1	0.0	0.0	0.0	0.0	0.0	0.0	0.0	0.0	0.0
517	518LEU	517	0.0	0.0	0.0	0.0	0.0	0.0	0.0	0.0	0.0	0.0	0.0	-1	0.0	0.0	0.0	0.0	0.0	0.0	0.0	0.0	0.0
518	519SER	518	0.0	0.0	0.0	0.0	0.0	0.0	0.0	0.0	0.0	0.0	0.0	-1	0.0	0.0	0.0	0.0	0.0	0.0	0.0	0.0	0.0
519	520GLU	519	0.0	0.0	0.0	0.0	0.0	0.0	0.0	0.0	0.0	0.0	0.0	-1	0.0	0.0	0.0	0.0	0.0	0.0	0.0	0.0	0.0
520	521ASP	520	0.0	0.0	0.0	0.0	0.0	0.0	0.0	0.0	0.0	0.0	0.0	-1	0.0	0.0	0.0	0.0	0.0	0.0	0.0	0.0	0.0
521	522LYS	521	0.0	0.0	0.0	0.0	0.0	0.0	0.0	0.0	0.0	0.0	0.0	-1	0.0	0.0	0.0	0.0	0.0	0.0	0.0	0.0	0.0
522	523SER	522	0.0	0.0	0.0	0.0	0.0	0.0	0.0	0.0	0.0	0.0	0.0	-1	0.0	0.0	0.0	0.0	0.0	0.0	0.0	0.0	0.0
523	524VAL	523	0.0	0.0	0.0	0.0	0.0	0.0	0.0	0.0	0.0	0.0	0.0	-1	0.0	0.0	0.0	0.0	0.0	0.0	0.0	0.0	0.0
524	525PHE	524	0.0	0.0	0.0	0.0	0.0	0.0	0.0	0.0	0.0	0.0	0.0	-1	0.0	0.0	0.0	0.0	0.0	0.0	0.0	0.0	0.0
525	526VAL	525	0.0	0.0	0.0	0.0	0.0	0.0	0.0	0.0	0.0	0.0	0.0	-1	0.0	0.0	0.0	0.0	0.0	0.0	0.0	0.0	0.0
526	527THR	526	0.0	0.0	0.0	0.0	0.0	0.0	0.0	0.0	0.0	0.0	0.0	-1	0.0	0.0	0.0	0.0	0.0	0.0	0.0	0.0	0.0
527	528ASN	527	0.0	0.0	0.0	0.0	0.0	0.0	0.0	0.0	0.0	0.0	0.0	-1	0.0	0.0	0.0	0.0	0.0	0.0	0.0	0.0	0.0
528	529LYS	528	0.0	0.0	0.0	0.0	0.0	0.0	0.0	0.0	0.0	0.0	0.0	-1	0.0	0.0	0.0	0.0	0.0	0.0	0.0	0.0	0.0
529	530LYS	529	0.0	0.0	0.0	0.0	0.0	0.0	0.0	0.0	0.0	0.0	0.0	-1	0.0	0.0	0.0	0.0	0.0	0.0	0.0	0.0	0.0
530	531SER	530	0.0	0.0	0.0	0.0	0.0	0.0	0.0	0.0	0.0	0.0	0.0	-1	0.0	0.0	0.0	0.0	0.0	0.0	0.0	0.0	0.0
531	532ASP	531	0.0	0.0	0.0	0.0	0.0	0.0	0.0	0.0	0.0	0.0	0.0	-1	0.0	0.0	0.0	0.0	0.0	0.0	0.0	0.0	0.0
532	533THR	532	0.0	0.0	0.0	0.0	0.0	0.0	0.0	0.0	0.0	0.0	0.0	-1	0.0	0.0	0.0	0.0	0.0	0.0	0.0	0.0	0.0
533	534SER	533	0.0	0.0	0.0	0.0	0.0	0.0	0.0	0.0	0.0	0.0	0.0	-1	0.0	0.0	0.0	0.0	0.0	0.0	0.0	0.0	0.0
534	535ILE	534	0.0	0.0	0.0	0.0	0.0	0.0	0.0	0.0	0.0	0.0	0.0	-1	0.0	0.0	0.0	0.0	0.0	0.0	0.0	0.0	0.0
535	536SER	535	0.0	0.0	0.0	0.0	0.0	0.0	0.0	0.0	0.0	0.0	0.0	-1	0.0	0.0	0.0	0.0	0.0	0.0	0.0	0.0	0.0
536	537ASP	536	0.0	0.0	0.0	0.0	0.0	0.0	0.0	0.0	0.0	0.0	0.0	-1	0.0	0.0	0.0	0.0	0.0	0.0	0.0	0.0	0.0
537	538SER	537	0.0	0.0	0.0	0.0	0.0	0.0	0.0	0.0	0.0	0.0	0.0	-1	0.0	0.0	0.0	0.0	0.0	0.0	0.0	0.0	0.0
538	539THR	538	0.0	0.0	0.0	0.0	0.0	0.0	0.0	0.0	0.0	0.0	0.0	-1	0.0	0.0	0.0	0.0	0.0	0.0	0.0	0.0	0.0
539	540LYS	539	0.0	0.0	0.0	0.0	0.0	0.0	0.0	0.0	0.0	0.0	0.0	-1	0.0	0.0	0.0	0.0	0.0	0.0	0.0	0.0	0.0
540	541ILE	540	0.0	0.0	0.0	0.0	0.0	0.0	0.0	0.0	0.0	0.0	0.0	-1	0.0	0.0	0.0	0.0	0.0	0.0	0.0	0.0	0.0
541	542ILE	541	0.0	0.0	0.0	0.0	0.0	0.0	0.0	0.0	0.0	0.0	0.0	-1	0.0	0.0	0.0	0.0	0.0	0.0	0.0	0.0	0.0
542	543PRO	542	0.0	0.0	0.0	0.0	0.0	0.0	0.0	0.0	0.0	0.0	0.0	-1	0.0	0.0	0.0	0.0	0.0	0.0	0.0	0.0	0.0
543	544THR	543	0.0	0.0	0.0	0.0	0.0	0.0	0.0	0.0	0.0	0.0	0.0	-1	0.0	0.0	0.0	0.0	0.0	0.0	0.0	0.0	0.0
544	545SER	544	0.0	0.0	0.0	0.0	0.0	0.0	0.0	0.0	0.0	0.0	0.0	-1	0.0	0.0	0.0	0.0	0.0	0.0	0.0	0.0	0.0
545	546GLU	545	0.0	0.0	0.0	0.0	0.0	0.0	0.0	0.0	0.0	0.0	0.0	-1	0.0	0.0	0.0	0.0	0.0	0.0	0.0	0.0	0.0
546	547ASP	546	0.0	0.0	0.0	0.0	0.0	0.0	0.0	0.0	0.0	0.0	0.0	-1	0.0	0.0	0.0	0.0	0.0	0.0	0.0	0.0	0.0
547	548GLU	547	0.0	0.0	0.0	0.0	0.0	0.0	0.0	0.0	0.0	0.0	0.0	-1	0.0	0.0	0.0	0.0	0.0	0.0	0.0	0.0	0.0
548	549ASN	548	0.0	0.0	0.0	0.0	0.0	0.0	0.0	0.0	0.0	0.0	0.0	-1	0.0	0.0	0.0	0.0	0.0	0.0	0.0	0.0	0.0
549	550ASN	549	0.0	0.0	0.0	0.0	0.0	0.0	0.0	0.0	0.0	0.0	0.0	-1	0.0	0.0	0.0	0.0	0.0	0.0	0.0	0.0	0.0
550	551ASP	550	0.0	0.0	0.0	0.0	0.0	0.0	0.0	0.0	0.0	0.0	0.0	-1	0.0	0.0	0.0	0.0	0.0	0.0	0.0	0.0	0.0
551	552ILE	551	0.0	0.0	0.0	0.0	0.0	0.0	0.0	0.0	0.0	0.0	0.0	-1	0.0	0.0	0.0	0.0	0.0	0.0	0.0	0.0	0.0
552	553LEU	552	0.0	0.0	0.0	0.0	0.0	0.0	0.0	0.0	0.0	0.0	0.0	-1	0.0	0.0	0.0	0.0	0.0	0.0	0.0	0.0	0.0
553	554LYS	553	0.0	0.0	0.0	0.0	0.0	0.0	0.0	0.0	0.0	0.0	0.0	-1	0.0	0.0	0.0	0.0	0.0	0.0	0.0	0.0	0.0
554	555LYS	554	0.0	0.0	0.0	0.0	0.0	0.0	0.0	0.0	0.0	0.0	0.0	-1	0.0	0.0	0.0	0.0	0.0	0.0	0.0	0.0	0.0
555	556ARG	555	0.0	0.0	0.0	0.0	0.0	0.0	0.0	0.0	0.0	0.0	0.0	-1	0.0	0.0	0.0	0.0	0.0	0.0	0.0	0.0	0.0
556	557SER	556	0.0	0.0	0.0	0.0	0.0	0.0	0.0	0.0	0.0	0.0	0.0	-1	0.0	0.0	0.0	0.0	0.0	0.0	0.0	0.0	0.0
557	558THR	557	0.0	0.0	0.0	0.0	0.0	0.0	0.0	0.0	0.0	0.0	0.0	-1	0.0	0.0	0.0	0.0	0.0	0.0	0.0	0.0	0.0
558	559ARG	558	0.0	0.0	0.0	0.0	0.0	0.0	0.0	0.0	0.0	0.0	0.0	-1	0.0	0.0	0.0	0.0	0.0	0.0	0.0	0.0	0.0
559	560MET	559	0.0	0.0	0.0	0.0	0.0	0.0	0.0	0.0	0.0	0.0	0.0	-1	0.0	0.0	0.0	0.0	0.0	0.0	0.0	0.0	0.0
560	561ARG	560	0.0	0.0	0.0	0.0	0.0	0.0	0.0	0.0	0.0	0.0	0.0	-1	0.0	0.0	0.0	0.0	0.0	0.0	0.0	0.0	0.0
561	562THR	561	0.0	0.0	0.0	0.0	0.0	0.0	0.0	0.0	0.0	0.0	0.0	-1	0.0	0.0	0.0	0.0	0.0	0.0	0.0	0.0	0.0
562	563PHE	562	0.0	0.0	0.0	0.0	0.0	0.0	0.0	0.0	0.0	0.0	0.0	-1	0.0	0.0	0.0	0.0	0.0	0.0	0.0	0.0	0.0
563	564LYS	563	0.0	0.0	0.0	0.0	0.0	0.0	0.0	0.0	0.0	0.0	0.0	-1	0.0	0.0	0.0	0.0	0.0	0.0	0.0	0.0	0.0
564	565ASP	564	0.0	0.0	0.0	0.0	0.0	0.0	0.0	0.0	0.0	0.0	0.0	-1	0.0	0.0	0.0	0.0	0.0	0.0	0.0	0.0	0.0
565	566SER	565	0.0	0.0	0.0	0.0	0.0	0.0	0.0	0.0	0.0	0.0	0.0	-1	0.0	0.0	0.0	0.0	0.0	0.0	0.0	0.0	0.0
566	567LYS	566	0.0	0.0	0.0	0.0	0.0	0.0	0.0	0.0	0.0	0.0	0.0	-1	0.0	0.0	0.0	0.0	0.0	0.0	0.0	0.0	0.0
567	568GLU	567	0.0	0.0	0.0	0.0	0.0	0.0	0.0	0.0	0.0	0.0	0.0	-1	0.0	0.0	0.0	0.0	0.0	0.0	0.0	0.0	0.0
568	569LYS	568	0.0	0.0	0.0	0.0	0.0	0.0	0.0	0.0	0.0	0.0	0.0	-1	0.0	0.0	0.0	0.0	0.0	0.0	0.0	0.0	0.0
569	570ASN	569	0.0	0.0	0.0	0.0	0.0	0.0	0.0	0.0	0.0	0.0	0.0	-1	0.0	0.0	0.0	0.0	0.0	0.0	0.0	0.0	0.0
570	571TYR	570	0.0	0.0	0.0	0.0	0.0	0.0	0.0	0.0	0.0	0.0	0.0	-1	0.0	0.0	0.0	0.0	0.0	0.0	0.0	0.0	0.0
571	572ILE	571	0.0	0.0	0.0	0.0	0.0	0.0	0.0	0.0	0.0	0.0	0.0	-1	0.0	0.0	0.0	0.0	0.0	0.0	0.0	0.0	0.0
572	573ASN	572	0.0	0.0	0.0	0.0	0.0	0.0	0.0	0.0	0.0	0.0	0.0	-1	0.0	0.0	0.0	0.0	0.0	0.0	0.0	0.0	0.0
573	574PHE	573	0.0	0.0	0.0	0.0	0.0	0.0	0.0	0.0	0.0	0.0	0.0	-1	0.0	0.0	0.0	0.0	0.0	0.0	0.0	0.0	0.0
574	575ASN	574	0.0	0.0	0.0	0.0	0.0	0.0	0.0	0.0	0.0	0.0	0.0	-1	0.0	0.0	0.0	0.0	0.0	0.0	0.0	0.0	0.0
575	576ALA	575	0.0	0.0	0.0	0.0	0.0	0.0	0.0	0.0	0.0	0.0	0.0	-1	0.0	0.0	0.0	0.0	0.0	0.0	0.0	0.0	0.0
576	577ILE	576	0.0	0.0	0.0	0.0	0.0	0.0	0.0	0.0	0.0	0.0	0.0	-1	0.0	0.0	0.0	0.0	0.0	0.0	0.0	0.0	0.0
577	578PRO	577	0.0	0.0	0.0	0.0	0.0	0.0	0.0	0.0	0.0	0.0	0.0	-1	0.0	0.0	0.0	0.0	0.0	0.0	0.0	0.0	0.0
578	579ARG	578	0.01	0.0	0.03998400639744103	0.0	1.0	0.0	0.0	0.0	-0.00040016006402532334	0.0	-0.00040016006402532334	-1	0.0	0.0	0.0	0.0	0.0	0.0	0.0	0.0	0.0
579	580THR	579	0.0	0.0	0.0	0.0	0.0	0.0	0.0	0.0	0.0	0.0	0.0	-1	0.0	0.0	0.0	0.0	0.0	0.0	0.0	0.0	0.0
585	586GLU	585	0.0	0.0	0.0	0.0	0.0	0.0	0.0	0.0	0.0	0.0	0.0	-1	0.0	0.0	0.0	0.0	0.0	0.0	0.0	0.0	0.0
586	587LEU	586	0.0	0.0	0.0	0.0	0.0	0.0	0.0	0.0	0.0	0.0	0.0	-1	0.0	0.0	0.0	0.0	0.0	0.0	0.0	0.0	0.0
588	589GLN	588	0.0	0.0	0.0	0.0	0.0	0.0	0.0	0.0	0.0	0.0	0.0	-1	0.0	0.0	0.0	0.0	0.0	0.0	0.0	0.0	0.0
589	590ILE	589	0.0	0.0	0.0	0.0	0.0	0.0	0.0	0.0	0.0	0.0	0.0	-1	0.0	0.0	0.0	0.0	0.0	0.0	0.0	0.0	0.0
590	591GLU	590	0.0	0.0	0.0	0.0	0.0	0.0	0.0	0.0	0.0	0.0	0.0	-1	0.0	0.0	0.0	0.0	0.0	0.0	0.0	0.0	0.0
591	592TYR	591	0.0	0.0	0.0	0.0	0.0	0.0	0.0	0.0	0.0	0.0	0.0	-1	0.0	0.0	0.0	0.0	0.0	0.0	0.0	0.0	0.0
592	593ILE	592	0.0	0.0	0.0	0.0	0.0	0.0	0.0	0.0	0.0	0.0	0.0	-1	0.0	0.0	0.0	0.0	0.0	0.0	0.0	0.0	0.0
593	594PHE	593	0.0	0.0	0.0	0.0	0.0	0.0	0.0	0.0	0.0	0.0	0.0	-1	0.0	0.0	0.0	0.0	0.0	0.0	0.0	0.0	0.0
594	595SER	594	0.0	0.0	0.0	0.0	0.0	0.0	0.0	0.0	0.0	0.0	0.0	-1	0.0	0.0	0.0	0.0	0.0	0.0	0.0	0.0	0.0
595	596ASP	595	0.0	0.0	0.0	0.0	0.0	0.0	0.0	0.0	0.0	0.0	0.0	-1	0.0	0.0	0.0	0.0	0.0	0.0	0.0	0.0	0.0
596	597LYS	596	0.0	0.0	0.0	0.0	0.0	0.0	0.0	0.0	0.0	0.0	0.0	-1	0.0	0.0	0.0	0.0	0.0	0.0	0.0	0.0	0.0
597	598THR	597	0.0	0.0	0.0	0.0	0.0	0.0	0.0	0.0	0.0	0.0	0.0	-1	0.0	0.0	0.0	0.0	0.0	0.0	0.0	0.0	0.0
598	599GLY	598	0.0	0.0	0.0	0.0	0.0	0.0	0.0	0.0	0.0	0.0	0.0	-1	0.0	0.0	0.0	0.0	0.0	0.0	0.0	0.0	0.0
599	600THR	599	0.0	0.0	0.0	0.0	0.0	0.0	0.0	0.0	0.0	0.0	0.0	-1	0.0	0.0	0.0	0.0	0.0	0.0	0.0	0.0	0.0
600	601LEU	600	0.0	0.0	0.0	0.0	0.0	0.0	0.0	0.0	0.0	0.0	0.0	-1	0.0	0.0	0.0	0.0	0.0	0.0	0.0	0.0	0.0
601	602THR	601	0.0	0.0	0.0	0.0	0.0	0.0	0.0	0.0	0.0	0.0	0.0	-1	0.0	0.0	0.0	0.0	0.0	0.0	0.0	0.0	0.0
602	603CYS	602	0.0	0.0	0.0	0.0	0.0	0.0	0.0	0.0	0.0	0.0	0.0	-1	0.0	0.0	0.0	0.0	0.0	0.0	0.0	0.0	0.0
603	604ASN	603	0.0	0.0	0.0	0.0	0.0	0.0	0.0	0.0	0.0	0.0	0.0	-1	0.0	0.0	0.0	0.0	0.0	0.0	0.0	0.0	0.0
604	605VAL	604	0.0	0.0	0.0	0.0	0.0	0.0	0.0	0.0	0.0	0.0	0.0	-1	0.0	0.0	0.0	0.0	0.0	0.0	0.0	0.0	0.0
605	606MET	605	0.0	0.0	0.0	0.0	0.0	0.0	0.0	0.0	0.0	0.0	0.0	-1	0.0	0.0	0.0	0.0	0.0	0.0	0.0	0.0	0.0
606	607GLU	606	0.0	0.0	0.0	0.0	0.0	0.0	0.0	0.0	0.0	0.0	0.0	-1	0.0	0.0	0.0	0.0	0.0	0.0	0.0	0.0	0.0
607	608PHE	607	0.0	0.0	0.0	0.0	0.0	0.0	0.0	0.0	0.0	0.0	0.0	-1	0.0	0.0	0.0	0.0	0.0	0.0	0.0	0.0	0.0
608	609ARG	608	0.0	0.0	0.0	0.0	0.0	0.0	0.0	0.0	0.0	0.0	0.0	-1	0.0	0.0	0.0	0.0	0.0	0.0	0.0	0.0	0.0
609	610LYS	609	0.0	0.0	0.0	0.0	0.0	0.0	0.0	0.0	0.0	0.0	0.0	-1	0.0	0.0	0.0	0.0	0.0	0.0	0.0	0.0	0.0
610	611CYS	610	0.0	0.0	0.0	0.0	0.0	0.0	0.0	0.0	0.0	0.0	0.0	-1	0.0	0.0	0.0	0.0	0.0	0.0	0.0	0.0	0.0
611	612ALA	611	0.0	0.0	0.0	0.0	0.0	0.0	0.0	0.0	0.0	0.0	0.0	-1	0.0	0.0	0.0	0.0	0.0	0.0	0.0	0.0	0.0
612	613ILE	612	0.0	0.0	0.0	0.0	0.0	0.0	0.0	0.0	0.0	0.0	0.0	-1	0.0	0.0	0.0	0.0	0.0	0.0	0.0	0.0	0.0
613	614ASN	613	0.0	0.0	0.0	0.0	0.0	0.0	0.0	0.0	0.0	0.0	0.0	-1	0.0	0.0	0.0	0.0	0.0	0.0	0.0	0.0	0.0
614	615GLY	614	0.0	0.0	0.0	0.0	0.0	0.0	0.0	0.0	0.0	0.0	0.0	-1	0.0	0.0	0.0	0.0	0.0	0.0	0.0	0.0	0.0
615	616ILE	615	0.0	0.0	0.0	0.0	0.0	0.0	0.0	0.0	0.0	0.0	0.0	-1	0.0	0.0	0.0	0.0	0.0	0.0	0.0	0.0	0.0
616	617SER	616	0.0	0.0	0.0	0.0	0.0	0.0	0.0	0.0	0.0	0.0	0.0	-1	0.0	0.0	0.0	0.0	0.0	0.0	0.0	0.0	0.0
617	618TYR	617	0.0	0.0	0.0	0.0	0.0	0.0	0.0	0.0	0.0	0.0	0.0	-1	0.0	0.0	0.0	0.0	0.0	0.0	0.0	0.0	0.0
618	619GLY	618	0.0	0.0	0.0	0.0	0.0	0.0	0.0	0.0	0.0	0.0	0.0	-1	0.0	0.0	0.0	0.0	0.0	0.0	0.0	0.0	0.0
619	620THR	619	0.0	0.0	0.0	0.0	0.0	0.0	0.0	0.0	0.0	0.0	0.0	-1	0.0	0.0	0.0	0.0	0.0	0.0	0.0	0.0	0.0
620	621GLY	620	0.0	0.0	0.0	0.0	0.0	0.0	0.0	0.0	0.0	0.0	0.0	-1	0.0	0.0	0.0	0.0	0.0	0.0	0.0	0.0	0.0
621	622LEU	621	0.0	0.0	0.0	0.0	0.0	0.0	0.0	0.0	0.0	0.0	0.0	-1	0.0	0.0	0.0	0.0	0.0	0.0	0.0	0.0	0.0
622	623THR	622	0.0	0.0	0.0	0.0	0.0	0.0	0.0	0.0	0.0	0.0	0.0	-1	0.0	0.0	0.0	0.0	0.0	0.0	0.0	0.0	0.0
623	624GLU	623	0.0	0.0	0.0	0.0	0.0	0.0	0.0	0.0	0.0	0.0	0.0	-1	0.0	0.0	0.0	0.0	0.0	0.0	0.0	0.0	0.0
624	625ILE	624	0.0	0.0	0.0	0.0	0.0	0.0	0.0	0.0	0.0	0.0	0.0	-1	0.0	0.0	0.0	0.0	0.0	0.0	0.0	0.0	0.0
625	626LYS	625	0.0	0.0	0.0	0.0	0.0	0.0	0.0	0.0	0.0	0.0	0.0	-1	0.0	0.0	0.0	0.0	0.0	0.0	0.0	0.0	0.0
626	627ARG	626	0.0	0.0	0.0	0.0	0.0	0.0	0.0	0.0	0.0	0.0	0.0	-1	0.0	0.0	0.0	0.0	0.0	0.0	0.0	0.0	0.0
627	628LYS	627	0.0	0.0	0.0	0.0	0.0	0.0	0.0	0.0	0.0	0.0	0.0	-1	0.0	0.0	0.0	0.0	0.0	0.0	0.0	0.0	0.0
628	629ILE	628	0.0	0.0	0.0	0.0	0.0	0.0	0.0	0.0	0.0	0.0	0.0	-1	0.0	0.0	0.0	0.0	0.0	0.0	0.0	0.0	0.0
629	630LEU	629	0.0	0.0	0.0	0.0	0.0	0.0	0.0	0.0	0.0	0.0	0.0	-1	0.0	0.0	0.0	0.0	0.0	0.0	0.0	0.0	0.0
630	631ILE	630	0.0	0.0	0.0	0.0	0.0	0.0	0.0	0.0	0.0	0.0	0.0	-1	0.0	0.0	0.0	0.0	0.0	0.0	0.0	0.0	0.0
631	632LYS	631	0.0	0.0	0.0	0.0	0.0	0.0	0.0	0.0	0.0	0.0	0.0	-1	0.0	0.0	0.0	0.0	0.0	0.0	0.0	0.0	0.0
632	633ASN	632	0.0	0.0	0.0	0.0	0.0	0.0	0.0	0.0	0.0	0.0	0.0	-1	0.0	0.0	0.0	0.0	0.0	0.0	0.0	0.0	0.0
633	634ASN	633	0.0	0.0	0.0	0.0	0.0	0.0	0.0	0.0	0.0	0.0	0.0	-1	0.0	0.0	0.0	0.0	0.0	0.0	0.0	0.0	0.0
634	635ILE	634	0.0	0.0	0.0	0.0	0.0	0.0	0.0	0.0	0.0	0.0	0.0	-1	0.0	0.0	0.0	0.0	0.0	0.0	0.0	0.0	0.0
635	636PRO	635	0.0	0.0	0.0	0.0	0.0	0.0	0.0	0.0	0.0	0.0	0.0	-1	0.0	0.0	0.0	0.0	0.0	0.0	0.0	0.0	0.0
636	637ILE	636	0.0	0.0	0.0	0.0	0.0	0.0	0.0	0.0	0.0	0.0	0.0	-1	0.0	0.0	0.0	0.0	0.0	0.0	0.0	0.0	0.0
637	638PRO	637	0.0	0.0	0.0	0.0	0.0	0.0	0.0	0.0	0.0	0.0	0.0	-1	0.0	0.0	0.0	0.0	0.0	0.0	0.0	0.0	0.0
638	639PRO	638	0.0	0.0	0.0	0.0	0.0	0.0	0.0	0.0	0.0	0.0	0.0	-1	0.0	0.0	0.0	0.0	0.0	0.0	0.0	0.0	0.0
639	640GLU	639	0.0	0.0	0.0	0.0	0.0	0.0	0.0	0.0	0.0	0.0	0.0	-1	0.0	0.0	0.0	0.0	0.0	0.0	0.0	0.0	0.0
640	641PRO	640	0.0	0.0	0.0	0.0	0.0	0.0	0.0	0.0	0.0	0.0	0.0	-1	0.0	0.0	0.0	0.0	0.0	0.0	0.0	0.0	0.0
641	642VAL	641	0.0	0.0	0.0	0.0	0.0	0.0	0.0	0.0	0.0	0.0	0.0	-1	0.0	0.0	0.0	0.0	0.0	0.0	0.0	0.0	0.0
642	643ASP	642	0.0	0.0	0.0	0.0	0.0	0.0	0.0	0.0	0.0	0.0	0.0	-1	0.0	0.0	0.0	0.0	0.0	0.0	0.0	0.0	0.0
643	644LEU	643	0.0	0.0	0.0	0.0	0.0	0.0	0.0	0.0	0.0	0.0	0.0	-1	0.0	0.0	0.0	0.0	0.0	0.0	0.0	0.0	0.0
644	645ASP	644	0.0	0.0	0.0	0.0	0.0	0.0	0.0	0.0	0.0	0.0	0.0	-1	0.0	0.0	0.0	0.0	0.0	0.0	0.0	0.0	0.0
645	646ILE	645	0.0	0.0	0.0	0.0	0.0	0.0	0.0	0.0	0.0	0.0	0.0	-1	0.0	0.0	0.0	0.0	0.0	0.0	0.0	0.0	0.0
646	647LYS	646	0.0	0.0	0.0	0.0	0.0	0.0	0.0	0.0	0.0	0.0	0.0	-1	0.0	0.0	0.0	0.0	0.0	0.0	0.0	0.0	0.0
647	648ASN	647	0.0	0.0	0.0	0.0	0.0	0.0	0.0	0.0	0.0	0.0	0.0	-1	0.0	0.0	0.0	0.0	0.0	0.0	0.0	0.0	0.0
648	649LYS	648	0.0	0.0	0.0	0.0	0.0	0.0	0.0	0.0	0.0	0.0	0.0	-1	0.0	0.0	0.0	0.0	0.0	0.0	0.0	0.0	0.0
649	650THR	649	0.0	0.0	0.0	0.0	0.0	0.0	0.0	0.0	0.0	0.0	0.0	-1	0.0	0.0	0.0	0.0	0.0	0.0	0.0	0.0	0.0
650	651PRO	650	0.0	0.0	0.0	0.0	0.0	0.0	0.0	0.0	0.0	0.0	0.0	-1	0.0	0.0	0.0	0.0	0.0	0.0	0.0	0.0	0.0
651	652ASN	651	0.0	0.0	0.0	0.0	0.0	0.0	0.0	0.0	0.0	0.0	0.0	-1	0.0	0.0	0.0	0.0	0.0	0.0	0.0	0.0	0.0
652	653VAL	652	0.0	0.0	0.0	0.0	0.0	0.0	0.0	0.0	0.0	0.0	0.0	-1	0.0	0.0	0.0	0.0	0.0	0.0	0.0	0.0	0.0
653	654ASN	653	0.0	0.0	0.0	0.0	0.0	0.0	0.0	0.0	0.0	0.0	0.0	-1	0.0	0.0	0.0	0.0	0.0	0.0	0.0	0.0	0.0
654	655ILE	654	0.0	0.0	0.0	0.0	0.0	0.0	0.0	0.0	0.0	0.0	0.0	-1	0.0	0.0	0.0	0.0	0.0	0.0	0.0	0.0	0.0
655	656ILE	655	0.0	0.0	0.0	0.0	0.0	0.0	0.0	0.0	0.0	0.0	0.0	-1	0.0	0.0	0.0	0.0	0.0	0.0	0.0	0.0	0.0
656	657ASP	656	0.0	0.0	0.0	0.0	0.0	0.0	0.0	0.0	0.0	0.0	0.0	-1	0.0	0.0	0.0	0.0	0.0	0.0	0.0	0.0	0.0
657	658LYS	657	0.0	0.0	0.0	0.0	0.0	0.0	0.0	0.0	0.0	0.0	0.0	-1	0.0	0.0	0.0	0.0	0.0	0.0	0.0	0.0	0.0
658	659LYS	658	0.0	0.0	0.0	0.0	0.0	0.0	0.0	0.0	0.0	0.0	0.0	-1	0.0	0.0	0.0	0.0	0.0	0.0	0.0	0.0	0.0
659	660LEU	659	0.0	0.0	0.0	0.0	0.0	0.0	0.0	0.0	0.0	0.0	0.0	-1	0.0	0.0	0.0	0.0	0.0	0.0	0.0	0.0	0.0
660	661VAL	660	0.0	0.0	0.0	0.0	0.0	0.0	0.0	0.0	0.0	0.0	0.0	-1	0.0	0.0	0.0	0.0	0.0	0.0	0.0	0.0	0.0
661	662ASP	661	0.0	0.0	0.0	0.0	0.0	0.0	0.0	0.0	0.0	0.0	0.0	-1	0.0	0.0	0.0	0.0	0.0	0.0	0.0	0.0	0.0
662	663HIS	662	0.0	0.0	0.0	0.0	0.0	0.0	0.0	0.0	0.0	0.0	0.0	-1	0.0	0.0	0.0	0.0	0.0	0.0	0.0	0.0	0.0
663	664LEU	663	0.0	0.0	0.0	0.0	0.0	0.0	0.0	0.0	0.0	0.0	0.0	-1	0.0	0.0	0.0	0.0	0.0	0.0	0.0	0.0	0.0
664	665LYS	664	0.0	0.0	0.0	0.0	0.0	0.0	0.0	0.0	0.0	0.0	0.0	-1	0.0	0.0	0.0	0.0	0.0	0.0	0.0	0.0	0.0
665	666ASP	665	0.0	0.0	0.0	0.0	0.0	0.0	0.0	0.0	0.0	0.0	0.0	-1	0.0	0.0	0.0	0.0	0.0	0.0	0.0	0.0	0.0
666	667VAL	666	0.0	0.0	0.0	0.0	0.0	0.0	0.0	0.0	0.0	0.0	0.0	-1	0.0	0.0	0.0	0.0	0.0	0.0	0.0	0.0	0.0
667	668ASN	667	0.0	0.0	0.0	0.0	0.0	0.0	0.0	0.0	0.0	0.0	0.0	-1	0.0	0.0	0.0	0.0	0.0	0.0	0.0	0.0	0.0
668	669HIS	668	0.0	0.0	0.0	0.0	0.0	0.0	0.0	0.0	0.0	0.0	0.0	-1	0.0	0.0	0.0	0.0	0.0	0.0	0.0	0.0	0.0
669	670PHE	669	0.0	0.0	0.0	0.0	0.0	0.0	0.0	0.0	0.0	0.0	0.0	-1	0.0	0.0	0.0	0.0	0.0	0.0	0.0	0.0	0.0
670	671ASN	670	0.0	0.0	0.0	0.0	0.0	0.0	0.0	0.0	0.0	0.0	0.0	-1	0.0	0.0	0.0	0.0	0.0	0.0	0.0	0.0	0.0
671	672HIS	671	0.0	0.0	0.0	0.0	0.0	0.0	0.0	0.0	0.0	0.0	0.0	-1	0.0	0.0	0.0	0.0	0.0	0.0	0.0	0.0	0.0
672	673ALA	672	0.0	0.0	0.0	0.0	0.0	0.0	0.0	0.0	0.0	0.0	0.0	-1	0.0	0.0	0.0	0.0	0.0	0.0	0.0	0.0	0.0
673	674SER	673	0.0	0.0	0.0	0.0	0.0	0.0	0.0	0.0	0.0	0.0	0.0	-1	0.0	0.0	0.0	0.0	0.0	0.0	0.0	0.0	0.0
674	675LEU	674	0.0	0.0	0.0	0.0	0.0	0.0	0.0	0.0	0.0	0.0	0.0	-1	0.0	0.0	0.0	0.0	0.0	0.0	0.0	0.0	0.0
675	676ILE	675	0.0	0.0	0.0	0.0	0.0	0.0	0.0	0.0	0.0	0.0	0.0	-1	0.0	0.0	0.0	0.0	0.0	0.0	0.0	0.0	0.0
676	677TYR	676	0.0	0.0	0.0	0.0	0.0	0.0	0.0	0.0	0.0	0.0	0.0	-1	0.0	0.0	0.0	0.0	0.0	0.0	0.0	0.0	0.0
677	678PHE	677	0.0	0.0	0.0	0.0	0.0	0.0	0.0	0.0	0.0	0.0	0.0	-1	0.0	0.0	0.0	0.0	0.0	0.0	0.0	0.0	0.0
678	679PHE	678	0.0	0.0	0.0	0.0	0.0	0.0	0.0	0.0	0.0	0.0	0.0	-1	0.0	0.0	0.0	0.0	0.0	0.0	0.0	0.0	0.0
679	680LEU	679	0.0	0.0	0.0	0.0	0.0	0.0	0.0	0.0	0.0	0.0	0.0	-1	0.0	0.0	0.0	0.0	0.0	0.0	0.0	0.0	0.0
680	681HIS	680	0.0	0.0	0.0	0.0	0.0	0.0	0.0	0.0	0.0	0.0	0.0	-1	0.0	0.0	0.0	0.0	0.0	0.0	0.0	0.0	0.0
681	682LEU	681	0.0	0.0	0.0	0.0	0.0	0.0	0.0	0.0	0.0	0.0	0.0	-1	0.0	0.0	0.0	0.0	0.0	0.0	0.0	0.0	0.0
682	683ALA	682	0.0	0.0	0.0	0.0	0.0	0.0	0.0	0.0	0.0	0.0	0.0	-1	0.0	0.0	0.0	0.0	0.0	0.0	0.0	0.0	0.0
683	684VAL	683	0.0	0.0	0.0	0.0	0.0	0.0	0.0	0.0	0.0	0.0	0.0	-1	0.0	0.0	0.0	0.0	0.0	0.0	0.0	0.0	0.0
684	685ASN	684	0.0	0.0	0.0	0.0	0.0	0.0	0.0	0.0	0.0	0.0	0.0	-1	0.0	0.0	0.0	0.0	0.0	0.0	0.0	0.0	0.0
685	686HIS	685	0.0	0.0	0.0	0.0	0.0	0.0	0.0	0.0	0.0	0.0	0.0	-1	0.0	0.0	0.0	0.0	0.0	0.0	0.0	0.0	0.0
686	687CYS	686	0.0	0.0	0.0	0.0	0.0	0.0	0.0	0.0	0.0	0.0	0.0	-1	0.0	0.0	0.0	0.0	0.0	0.0	0.0	0.0	0.0
687	688VAL	687	0.0	0.0	0.0	0.0	0.0	0.0	0.0	0.0	0.0	0.0	0.0	-1	0.0	0.0	0.0	0.0	0.0	0.0	0.0	0.0	0.0
688	689MET	688	0.0	0.0	0.0	0.0	0.0	0.0	0.0	0.0	0.0	0.0	0.0	-1	0.0	0.0	0.0	0.0	0.0	0.0	0.0	0.0	0.0
689	690CYS	689	0.0	0.0	0.0	0.0	0.0	0.0	0.0	0.0	0.0	0.0	0.0	-1	0.0	0.0	0.0	0.0	0.0	0.0	0.0	0.0	0.0
690	691ASP	690	0.0	0.0	0.0	0.0	0.0	0.0	0.0	0.0	0.0	0.0	0.0	-1	0.0	0.0	0.0	0.0	0.0	0.0	0.0	0.0	0.0
691	692THR	691	0.0	0.0	0.0	0.0	0.0	0.0	0.0	0.0	0.0	0.0	0.0	-1	0.0	0.0	0.0	0.0	0.0	0.0	0.0	0.0	0.0
692	693SER	692	0.0	0.0	0.0	0.0	0.0	0.0	0.0	0.0	0.0	0.0	0.0	-1	0.0	0.0	0.0	0.0	0.0	0.0	0.0	0.0	0.0
693	694ASP	693	0.0	0.0	0.0	0.0	0.0	0.0	0.0	0.0	0.0	0.0	0.0	-1	0.0	0.0	0.0	0.0	0.0	0.0	0.0	0.0	0.0
694	695ASP	694	0.0	0.0	0.0	0.0	0.0	0.0	0.0	0.0	0.0	0.0	0.0	-1	0.0	0.0	0.0	0.0	0.0	0.0	0.0	0.0	0.0
695	696VAL	695	0.0	0.0	0.0	0.0	0.0	0.0	0.0	0.0	0.0	0.0	0.0	-1	0.0	0.0	0.0	0.0	0.0	0.0	0.0	0.0	0.0
696	697ASN	696	0.0	0.0	0.0	0.0	0.0	0.0	0.0	0.0	0.0	0.0	0.0	-1	0.0	0.0	0.0	0.0	0.0	0.0	0.0	0.0	0.0
697	698ALA	697	0.0	0.0	0.0	0.0	0.0	0.0	0.0	0.0	0.0	0.0	0.0	-1	0.0	0.0	0.0	0.0	0.0	0.0	0.0	0.0	0.0
698	699TYR	698	0.0	0.0	0.0	0.0	0.0	0.0	0.0	0.0	0.0	0.0	0.0	-1	0.0	0.0	0.0	0.0	0.0	0.0	0.0	0.0	0.0
699	700SER	699	0.0	0.0	0.0	0.0	0.0	0.0	0.0	0.0	0.0	0.0	0.0	-1	0.0	0.0	0.0	0.0	0.0	0.0	0.0	0.0	0.0
700	701SER	700	0.0	0.0	0.0	0.0	0.0	0.0	0.0	0.0	0.0	0.0	0.0	-1	0.0	0.0	0.0	0.0	0.0	0.0	0.0	0.0	0.0
701	702SER	701	0.0	0.0	0.0	0.0	0.0	0.0	0.0	0.0	0.0	0.0	0.0	-1	0.0	0.0	0.0	0.0	0.0	0.0	0.0	0.0	0.0
702	703SER	702	0.0	0.0	0.0	0.0	0.0	0.0	0.0	0.0	0.0	0.0	0.0	-1	0.0	0.0	0.0	0.0	0.0	0.0	0.0	0.0	0.0
703	704PRO	703	0.0	0.0	0.0	0.0	0.0	0.0	0.0	0.0	0.0	0.0	0.0	-1	0.0	0.0	0.0	0.0	0.0	0.0	0.0	0.0	0.0
704	705ASP	704	0.0	0.0	0.0	0.0	0.0	0.0	0.0	0.0	0.0	0.0	0.0	-1	0.0	0.0	0.0	0.0	0.0	0.0	0.0	0.0	0.0
705	706GLU	705	0.0	0.0	0.0	0.0	0.0	0.0	0.0	0.0	0.0	0.0	0.0	-1	0.0	0.0	0.0	0.0	0.0	0.0	0.0	0.0	0.0
706	707GLU	706	0.0	0.0	0.0	0.0	0.0	0.0	0.0	0.0	0.0	0.0	0.0	-1	0.0	0.0	0.0	0.0	0.0	0.0	0.0	0.0	0.0
707	708ALA	707	0.0	0.0	0.0	0.0	0.0	0.0	0.0	0.0	0.0	0.0	0.0	-1	0.0	0.0	0.0	0.0	0.0	0.0	0.0	0.0	0.0
708	709LEU	708	0.0	0.0	0.0	0.0	0.0	0.0	0.0	0.0	0.0	0.0	0.0	-1	0.0	0.0	0.0	0.0	0.0	0.0	0.0	0.0	0.0
709	710VAL	709	0.0	0.0	0.0	0.0	0.0	0.0	0.0	0.0	0.0	0.0	0.0	-1	0.0	0.0	0.0	0.0	0.0	0.0	0.0	0.0	0.0
710	711TYR	710	0.0	0.0	0.0	0.0	0.0	0.0	0.0	0.0	0.0	0.0	0.0	-1	0.0	0.0	0.0	0.0	0.0	0.0	0.0	0.0	0.0
711	712ALA	711	0.0	0.0	0.0	0.0	0.0	0.0	0.0	0.0	0.0	0.0	0.0	-1	0.0	0.0	0.0	0.0	0.0	0.0	0.0	0.0	0.0
712	713ALA	712	0.0	0.0	0.0	0.0	0.0	0.0	0.0	0.0	0.0	0.0	0.0	-1	0.0	0.0	0.0	0.0	0.0	0.0	0.0	0.0	0.0
713	714LYS	713	0.0	0.0	0.0	0.0	0.0	0.0	0.0	0.0	0.0	0.0	0.0	-1	0.0	0.0	0.0	0.0	0.0	0.0	0.0	0.0	0.0
714	715HIS	714	0.0	0.0	0.0	0.0	0.0	0.0	0.0	0.0	0.0	0.0	0.0	-1	0.0	0.0	0.0	0.0	0.0	0.0	0.0	0.0	0.0
715	716PHE	715	0.0	0.0	0.0	0.0	0.0	0.0	0.0	0.0	0.0	0.0	0.0	-1	0.0	0.0	0.0	0.0	0.0	0.0	0.0	0.0	0.0
716	717GLY	716	0.0	0.0	0.0	0.0	0.0	0.0	0.0	0.0	0.0	0.0	0.0	-1	0.0	0.0	0.0	0.0	0.0	0.0	0.0	0.0	0.0
717	718ILE	717	0.0	0.0	0.0	0.0	0.0	0.0	0.0	0.0	0.0	0.0	0.0	-1	0.0	0.0	0.0	0.0	0.0	0.0	0.0	0.0	0.0
718	719THR	718	0.0	0.0	0.0	0.0	0.0	0.0	0.0	0.0	0.0	0.0	0.0	-1	0.0	0.0	0.0	0.0	0.0	0.0	0.0	0.0	0.0
719	720PHE	719	0.0	0.0	0.0	0.0	0.0	0.0	0.0	0.0	0.0	0.0	0.0	-1	0.0	0.0	0.0	0.0	0.0	0.0	0.0	0.0	0.0
720	721LEU	720	0.0	0.0	0.0	0.0	0.0	0.0	0.0	0.0	0.0	0.0	0.0	-1	0.0	0.0	0.0	0.0	0.0	0.0	0.0	0.0	0.0
721	722TYR	721	0.0	0.0	0.0	0.0	0.0	0.0	0.0	0.0	0.0	0.0	0.0	-1	0.0	0.0	0.0	0.0	0.0	0.0	0.0	0.0	0.0
722	723ARG	722	0.0	0.0	0.0	0.0	0.0	0.0	0.0	0.0	0.0	0.0	0.0	-1	0.0	0.0	0.0	0.0	0.0	0.0	0.0	0.0	0.0
723	724LYS	723	0.0	0.0	0.0	0.0	0.0	0.0	0.0	0.0	0.0	0.0	0.0	-1	0.0	0.0	0.0	0.0	0.0	0.0	0.0	0.0	0.0
724	725ASP	724	0.0	0.0	0.0	0.0	0.0	0.0	0.0	0.0	0.0	0.0	0.0	-1	0.0	0.0	0.0	0.0	0.0	0.0	0.0	0.0	0.0
725	726GLY	725	0.0	0.0	0.0	0.0	0.0	0.0	0.0	0.0	0.0	0.0	0.0	-1	0.0	0.0	0.0	0.0	0.0	0.0	0.0	0.0	0.0
726	727LYS	726	0.0	0.0	0.0	0.0	0.0	0.0	0.0	0.0	0.0	0.0	0.0	-1	0.0	0.0	0.0	0.0	0.0	0.0	0.0	0.0	0.0
727	728CYS	727	0.0	0.0	0.0	0.0	0.0	0.0	0.0	0.0	0.0	0.0	0.0	-1	0.0	0.0	0.0	0.0	0.0	0.0	0.0	0.0	0.0
728	729GLY	728	0.0	0.0	0.0	0.0	0.0	0.0	0.0	0.0	0.0	0.0	0.0	-1	0.0	0.0	0.0	0.0	0.0	0.0	0.0	0.0	0.0
729	730VAL	729	0.0	0.0	0.0	0.0	0.0	0.0	0.0	0.0	0.0	0.0	0.0	-1	0.0	0.0	0.0	0.0	0.0	0.0	0.0	0.0	0.0
730	731LYS	730	0.0	0.0	0.0	0.0	0.0	0.0	0.0	0.0	0.0	0.0	0.0	-1	0.0	0.0	0.0	0.0	0.0	0.0	0.0	0.0	0.0
731	732ILE	731	0.0	0.0	0.0	0.0	0.0	0.0	0.0	0.0	0.0	0.0	0.0	-1	0.0	0.0	0.0	0.0	0.0	0.0	0.0	0.0	0.0
732	733PHE	732	0.0	0.0	0.0	0.0	0.0	0.0	0.0	0.0	0.0	0.0	0.0	-1	0.0	0.0	0.0	0.0	0.0	0.0	0.0	0.0	0.0
733	734ASP	733	0.0	0.0	0.0	0.0	0.0	0.0	0.0	0.0	0.0	0.0	0.0	-1	0.0	0.0	0.0	0.0	0.0	0.0	0.0	0.0	0.0
734	735LYS	734	0.0	0.0	0.0	0.0	0.0	0.0	0.0	0.0	0.0	0.0	0.0	-1	0.0	0.0	0.0	0.0	0.0	0.0	0.0	0.0	0.0
735	736VAL	735	0.0	0.0	0.0	0.0	0.0	0.0	0.0	0.0	0.0	0.0	0.0	-1	0.0	0.0	0.0	0.0	0.0	0.0	0.0	0.0	0.0
736	737TYR	736	0.0	0.0	0.0	0.0	0.0	0.0	0.0	0.0	0.0	0.0	0.0	-1	0.0	0.0	0.0	0.0	0.0	0.0	0.0	0.0	0.0
737	738GLU	737	0.0	0.0	0.0	0.0	0.0	0.0	0.0	0.0	0.0	0.0	0.0	-1	0.0	0.0	0.0	0.0	0.0	0.0	0.0	0.0	0.0
738	739ILE	738	0.0	0.0	0.0	0.0	0.0	0.0	0.0	0.0	0.0	0.0	0.0	-1	0.0	0.0	0.0	0.0	0.0	0.0	0.0	0.0	0.0
739	740ASP	739	0.0	0.0	0.0	0.0	0.0	0.0	0.0	0.0	0.0	0.0	0.0	-1	0.0	0.0	0.0	0.0	0.0	0.0	0.0	0.0	0.0
740	741ILE	740	0.0	0.0	0.0	0.0	0.0	0.0	0.0	0.0	0.0	0.0	0.0	-1	0.0	0.0	0.0	0.0	0.0	0.0	0.0	0.0	0.0
741	742LEU	741	0.0	0.0	0.0	0.0	0.0	0.0	0.0	0.0	0.0	0.0	0.0	-1	0.0	0.0	0.0	0.0	0.0	0.0	0.0	0.0	0.0
742	743ALA	742	0.0	0.0	0.0	0.0	0.0	0.0	0.0	0.0	0.0	0.0	0.0	-1	0.0	0.0	0.0	0.0	0.0	0.0	0.0	0.0	0.0
743	744THR	743	0.0	0.0	0.0	0.0	0.0	0.0	0.0	0.0	0.0	0.0	0.0	-1	0.0	0.0	0.0	0.0	0.0	0.0	0.0	0.0	0.0
744	745ILE	744	0.0	0.0	0.0	0.0	0.0	0.0	0.0	0.0	0.0	0.0	0.0	-1	0.0	0.0	0.0	0.0	0.0	0.0	0.0	0.0	0.0
745	746GLU	745	0.0	0.0	0.0	0.0	0.0	0.0	0.0	0.0	0.0	0.0	0.0	-1	0.0	0.0	0.0	0.0	0.0	0.0	0.0	0.0	0.0
746	747PHE	746	0.0	0.0	0.0	0.0	0.0	0.0	0.0	0.0	0.0	0.0	0.0	-1	0.0	0.0	0.0	0.0	0.0	0.0	0.0	0.0	0.0
747	748THR	747	0.0	0.0	0.0	0.0	0.0	0.0	0.0	0.0	0.0	0.0	0.0	-1	0.0	0.0	0.0	0.0	0.0	0.0	0.0	0.0	0.0
748	749SER	748	0.0	0.0	0.0	0.0	0.0	0.0	0.0	0.0	0.0	0.0	0.0	-1	0.0	0.0	0.0	0.0	0.0	0.0	0.0	0.0	0.0
749	750LYS	749	0.0	0.0	0.0	0.0	0.0	0.0	0.0	0.0	0.0	0.0	0.0	-1	0.0	0.0	0.0	0.0	0.0	0.0	0.0	0.0	0.0
750	751ARG	750	0.0	0.0	0.0	0.0	0.0	0.0	0.0	0.0	0.0	0.0	0.0	-1	0.0	0.0	0.0	0.0	0.0	0.0	0.0	0.0	0.0
751	752LYS	751	0.0	0.0	0.0	0.0	0.0	0.0	0.0	0.0	0.0	0.0	0.0	-1	0.0	0.0	0.0	0.0	0.0	0.0	0.0	0.0	0.0
752	753MET	752	0.0	0.0	0.0	0.0	0.0	0.0	0.0	0.0	0.0	0.0	0.0	-1	0.0	0.0	0.0	0.0	0.0	0.0	0.0	0.0	0.0
753	754SER	753	0.0	0.0	0.0	0.0	0.0	0.0	0.0	0.0	0.0	0.0	0.0	-1	0.0	0.0	0.0	0.0	0.0	0.0	0.0	0.0	0.0
754	755THR	754	0.0	0.0	0.0	0.0	0.0	0.0	0.0	0.0	0.0	0.0	0.0	-1	0.0	0.0	0.0	0.0	0.0	0.0	0.0	0.0	0.0
755	756ILE	755	0.0	0.0	0.0	0.0	0.0	0.0	0.0	0.0	0.0	0.0	0.0	-1	0.0	0.0	0.0	0.0	0.0	0.0	0.0	0.0	0.0
756	757VAL	756	0.0	0.0	0.0	0.0	0.0	0.0	0.0	0.0	0.0	0.0	0.0	-1	0.0	0.0	0.0	0.0	0.0	0.0	0.0	0.0	0.0
757	758CYS	757	0.0	0.0	0.0	0.0	0.0	0.0	0.0	0.0	0.0	0.0	0.0	-1	0.0	0.0	0.0	0.0	0.0	0.0	0.0	0.0	0.0
758	759ARG	758	0.0	0.0	0.0	0.0	0.0	0.0	0.0	0.0	0.0	0.0	0.0	-1	0.0	0.0	0.0	0.0	0.0	0.0	0.0	0.0	0.0
759	760ILE	759	0.0	0.0	0.0	0.0	0.0	0.0	0.0	0.0	0.0	0.0	0.0	-1	0.0	0.0	0.0	0.0	0.0	0.0	0.0	0.0	0.0
760	761PRO	760	0.0	0.0	0.0	0.0	0.0	0.0	0.0	0.0	0.0	0.0	0.0	-1	0.0	0.0	0.0	0.0	0.0	0.0	0.0	0.0	0.0
761	762VAL	761	0.0	0.0	0.0	0.0	0.0	0.0	0.0	0.0	0.0	0.0	0.0	-1	0.0	0.0	0.0	0.0	0.0	0.0	0.0	0.0	0.0
762	763MET	762	0.0	0.0	0.0	0.0	0.0	0.0	0.0	0.0	0.0	0.0	0.0	-1	0.0	0.0	0.0	0.0	0.0	0.0	0.0	0.0	0.0
763	764SER	763	0.0	0.0	0.0	0.0	0.0	0.0	0.0	0.0	0.0	0.0	0.0	-1	0.0	0.0	0.0	0.0	0.0	0.0	0.0	0.0	0.0
764	765ASN	764	0.0	0.0	0.0	0.0	0.0	0.0	0.0	0.0	0.0	0.0	0.0	-1	0.0	0.0	0.0	0.0	0.0	0.0	0.0	0.0	0.0
765	766GLU	765	0.0	0.0	0.0	0.0	0.0	0.0	0.0	0.0	0.0	0.0	0.0	-1	0.0	0.0	0.0	0.0	0.0	0.0	0.0	0.0	0.0
766	767ASP	766	0.0	0.0	0.0	0.0	0.0	0.0	0.0	0.0	0.0	0.0	0.0	-1	0.0	0.0	0.0	0.0	0.0	0.0	0.0	0.0	0.0
767	768THR	767	0.0	0.0	0.0	0.0	0.0	0.0	0.0	0.0	0.0	0.0	0.0	-1	0.0	0.0	0.0	0.0	0.0	0.0	0.0	0.0	0.0
768	769LYS	768	0.0	0.0	0.0	0.0	0.0	0.0	0.0	0.0	0.0	0.0	0.0	-1	0.0	0.0	0.0	0.0	0.0	0.0	0.0	0.0	0.0
769	770THR	769	0.0	0.0	0.0	0.0	0.0	0.0	0.0	0.0	0.0	0.0	0.0	-1	0.0	0.0	0.0	0.0	0.0	0.0	0.0	0.0	0.0
770	771SER	770	0.0	0.0	0.0	0.0	0.0	0.0	0.0	0.0	0.0	0.0	0.0	-1	0.0	0.0	0.0	0.0	0.0	0.0	0.0	0.0	0.0
771	772PRO	771	0.0	0.0	0.0	0.0	0.0	0.0	0.0	0.0	0.0	0.0	0.0	-1	0.0	0.0	0.0	0.0	0.0	0.0	0.0	0.0	0.0
772	773THR	772	0.0	0.0	0.0	0.0	0.0	0.0	0.0	0.0	0.0	0.0	0.0	-1	0.0	0.0	0.0	0.0	0.0	0.0	0.0	0.0	0.0
773	774ASN	773	0.0	0.0	0.0	0.0	0.0	0.0	0.0	0.0	0.0	0.0	0.0	-1	0.0	0.0	0.0	0.0	0.0	0.0	0.0	0.0	0.0
774	775ASN	774	0.0	0.0	0.0	0.0	0.0	0.0	0.0	0.0	0.0	0.0	0.0	-1	0.0	0.0	0.0	0.0	0.0	0.0	0.0	0.0	0.0
775	776LYS	775	0.0	0.0	0.0	0.0	0.0	0.0	0.0	0.0	0.0	0.0	0.0	-1	0.0	0.0	0.0	0.0	0.0	0.0	0.0	0.0	0.0
776	777THR	776	0.0	0.0	0.0	0.0	0.0	0.0	0.0	0.0	0.0	0.0	0.0	-1	0.0	0.0	0.0	0.0	0.0	0.0	0.0	0.0	0.0
777	778MET	777	0.0	0.0	0.0	0.0	0.0	0.0	0.0	0.0	0.0	0.0	0.0	-1	0.0	0.0	0.0	0.0	0.0	0.0	0.0	0.0	0.0
778	779PRO	778	0.0	0.0	0.0	0.0	0.0	0.0	0.0	0.0	0.0	0.0	0.0	-1	0.0	0.0	0.0	0.0	0.0	0.0	0.0	0.0	0.0
779	780ARG	779	0.0	0.0	0.0	0.0	0.0	0.0	0.0	0.0	0.0	0.0	0.0	-1	0.0	0.0	0.0	0.0	0.0	0.0	0.0	0.0	0.0
780	781PRO	780	0.0	0.0	0.0	0.0	0.0	0.0	0.0	0.0	0.0	0.0	0.0	-1	0.0	0.0	0.0	0.0	0.0	0.0	0.0	0.0	0.0
781	782PRO	781	0.0	0.0	0.0	0.0	0.0	0.0	0.0	0.0	0.0	0.0	0.0	-1	0.0	0.0	0.0	0.0	0.0	0.0	0.0	0.0	0.0
782	783ASN	782	0.0	0.0	0.0	0.0	0.0	0.0	0.0	0.0	0.0	0.0	0.0	-1	0.0	0.0	0.0	0.0	0.0	0.0	0.0	0.0	0.0
783	784GLY	783	0.0	0.0	0.0	0.0	0.0	0.0	0.0	0.0	0.0	0.0	0.0	-1	0.0	0.0	0.0	0.0	0.0	0.0	0.0	0.0	0.0
784	785ASN	784	0.0	0.0	0.0	0.0	0.0	0.0	0.0	0.0	0.0	0.0	0.0	-1	0.0	0.0	0.0	0.0	0.0	0.0	0.0	0.0	0.0
785	786GLY	785	0.0	0.0	0.0	0.0	0.0	0.0	0.0	0.0	0.0	0.0	0.0	-1	0.0	0.0	0.0	0.0	0.0	0.0	0.0	0.0	0.0
786	787ASN	786	0.0	0.0	0.0	0.0	0.0	0.0	0.0	0.0	0.0	0.0	0.0	-1	0.0	0.0	0.0	0.0	0.0	0.0	0.0	0.0	0.0
787	788ASN	787	0.0	0.0	0.0	0.0	0.0	0.0	0.0	0.0	0.0	0.0	0.0	-1	0.0	0.0	0.0	0.0	0.0	0.0	0.0	0.0	0.0
788	789ASP	788	0.0	0.0	0.0	0.0	0.0	0.0	0.0	0.0	0.0	0.0	0.0	-1	0.0	0.0	0.0	0.0	0.0	0.0	0.0	0.0	0.0
789	790VAL	789	0.0	0.0	0.0	0.0	0.0	0.0	0.0	0.0	0.0	0.0	0.0	-1	0.0	0.0	0.0	0.0	0.0	0.0	0.0	0.0	0.0
790	791LEU	790	0.0	0.0	0.0	0.0	0.0	0.0	0.0	0.0	0.0	0.0	0.0	-1	0.0	0.0	0.0	0.0	0.0	0.0	0.0	0.0	0.0
791	792THR	791	0.0	0.0	0.0	0.0	0.0	0.0	0.0	0.0	0.0	0.0	0.0	-1	0.0	0.0	0.0	0.0	0.0	0.0	0.0	0.0	0.0
792	793ASN	792	0.0	0.0	0.0	0.0	0.0	0.0	0.0	0.0	0.0	0.0	0.0	-1	0.0	0.0	0.0	0.0	0.0	0.0	0.0	0.0	0.0
793	794GLY	793	0.0	0.0	0.0	0.0	0.0	0.0	0.0	0.0	0.0	0.0	0.0	-1	0.0	0.0	0.0	0.0	0.0	0.0	0.0	0.0	0.0
794	795GLU	794	0.0	0.0	0.0	0.0	0.0	0.0	0.0	0.0	0.0	0.0	0.0	-1	0.0	0.0	0.0	0.0	0.0	0.0	0.0	0.0	0.0
795	796ARG	795	0.0	0.0	0.0	0.0	0.0	0.0	0.0	0.0	0.0	0.0	0.0	-1	0.0	0.0	0.0	0.0	0.0	0.0	0.0	0.0	0.0
796	797ASN	796	0.0	0.0	0.0	0.0	0.0	0.0	0.0	0.0	0.0	0.0	0.0	-1	0.0	0.0	0.0	0.0	0.0	0.0	0.0	0.0	0.0
797	798GLY	797	0.0	0.0	0.0	0.0	0.0	0.0	0.0	0.0	0.0	0.0	0.0	-1	0.0	0.0	0.0	0.0	0.0	0.0	0.0	0.0	0.0
798	799ASN	798	0.0	0.0	0.0	0.0	0.0	0.0	0.0	0.0	0.0	0.0	0.0	-1	0.0	0.0	0.0	0.0	0.0	0.0	0.0	0.0	0.0
799	800GLY	799	0.0	0.0	0.0	0.0	0.0	0.0	0.0	0.0	0.0	0.0	0.0	-1	0.0	0.0	0.0	0.0	0.0	0.0	0.0	0.0	0.0
800	801MET	800	0.0	0.0	0.0	0.0	0.0	0.0	0.0	0.0	0.0	0.0	0.0	-1	0.0	0.0	0.0	0.0	0.0	0.0	0.0	0.0	0.0
801	802GLY	801	0.0	0.0	0.0	0.0	0.0	0.0	0.0	0.0	0.0	0.0	0.0	-1	0.0	0.0	0.0	0.0	0.0	0.0	0.0	0.0	0.0
802	803ASP	802	0.0	0.0	0.0	0.0	0.0	0.0	0.0	0.0	0.0	0.0	0.0	-1	0.0	0.0	0.0	0.0	0.0	0.0	0.0	0.0	0.0
803	804SER	803	0.0	0.0	0.0	0.0	0.0	0.0	0.0	0.0	0.0	0.0	0.0	-1	0.0	0.0	0.0	0.0	0.0	0.0	0.0	0.0	0.0
804	805PRO	804	0.0	0.0	0.0	0.0	0.0	0.0	0.0	0.0	0.0	0.0	0.0	-1	0.0	0.0	0.0	0.0	0.0	0.0	0.0	0.0	0.0
805	806ALA	805	0.0	0.0	0.0	0.0	0.0	0.0	0.0	0.0	0.0	0.0	0.0	-1	0.0	0.0	0.0	0.0	0.0	0.0	0.0	0.0	0.0
806	807ASN	806	0.0	0.0	0.0	0.0	0.0	0.0	0.0	0.0	0.0	0.0	0.0	-1	0.0	0.0	0.0	0.0	0.0	0.0	0.0	0.0	0.0
807	808LEU	807	0.0	0.0	0.0	0.0	0.0	0.0	0.0	0.0	0.0	0.0	0.0	-1	0.0	0.0	0.0	0.0	0.0	0.0	0.0	0.0	0.0
808	809PRO	808	0.0	0.0	0.0	0.0	0.0	0.0	0.0	0.0	0.0	0.0	0.0	-1	0.0	0.0	0.0	0.0	0.0	0.0	0.0	0.0	0.0
809	810THR	809	0.0	0.0	0.0	0.0	0.0	0.0	0.0	0.0	0.0	0.0	0.0	-1	0.0	0.0	0.0	0.0	0.0	0.0	0.0	0.0	0.0
810	811GLY	810	0.0	0.0	0.0	0.0	0.0	0.0	0.0	0.0	0.0	0.0	0.0	-1	0.0	0.0	0.0	0.0	0.0	0.0	0.0	0.0	0.0
811	812ASN	811	0.0	0.0	0.0	0.0	0.0	0.0	0.0	0.0	0.0	0.0	0.0	-1	0.0	0.0	0.0	0.0	0.0	0.0	0.0	0.0	0.0
812	813GLU	812	0.0	0.0	0.0	0.0	0.0	0.0	0.0	0.0	0.0	0.0	0.0	-1	0.0	0.0	0.0	0.0	0.0	0.0	0.0	0.0	0.0
813	814SER	813	0.0	0.0	0.0	0.0	0.0	0.0	0.0	0.0	0.0	0.0	0.0	-1	0.0	0.0	0.0	0.0	0.0	0.0	0.0	0.0	0.0
814	815ASN	814	0.0	0.0	0.0	0.0	0.0	0.0	0.0	0.0	0.0	0.0	0.0	-1	0.0	0.0	0.0	0.0	0.0	0.0	0.0	0.0	0.0
815	816ILE	815	0.0	0.0	0.0	0.0	0.0	0.0	0.0	0.0	0.0	0.0	0.0	-1	0.0	0.0	0.0	0.0	0.0	0.0	0.0	0.0	0.0
816	817SER	816	0.0	0.0	0.0	0.0	0.0	0.0	0.0	0.0	0.0	0.0	0.0	-1	0.0	0.0	0.0	0.0	0.0	0.0	0.0	0.0	0.0
817	818PRO	817	0.0	0.0	0.0	0.0	0.0	0.0	0.0	0.0	0.0	0.0	0.0	-1	0.0	0.0	0.0	0.0	0.0	0.0	0.0	0.0	0.0
818	819ALA	818	0.0	0.0	0.0	0.0	0.0	0.0	0.0	0.0	0.0	0.0	0.0	-1	0.0	0.0	0.0	0.0	0.0	0.0	0.0	0.0	0.0
819	820PRO	819	0.0	0.0	0.0	0.0	0.0	0.0	0.0	0.0	0.0	0.0	0.0	-1	0.0	0.0	0.0	0.0	0.0	0.0	0.0	0.0	0.0
820	821LEU	820	0.0	0.0	0.0	0.0	0.0	0.0	0.0	0.0	0.0	0.0	0.0	-1	0.0	0.0	0.0	0.0	0.0	0.0	0.0	0.0	0.0
821	822GLU	821	0.0	0.0	0.0	0.0	0.0	0.0	0.0	0.0	0.0	0.0	0.0	-1	0.0	0.0	0.0	0.0	0.0	0.0	0.0	0.0	0.0
822	823LYS	822	0.0	0.0	0.0	0.0	0.0	0.0	0.0	0.0	0.0	0.0	0.0	-1	0.0	0.0	0.0	0.0	0.0	0.0	0.0	0.0	0.0
823	824VAL	823	0.0	0.0	0.0	0.0	0.0	0.0	0.0	0.0	0.0	0.0	0.0	-1	0.0	0.0	0.0	0.0	0.0	0.0	0.0	0.0	0.0
824	825LYS	824	0.0	0.0	0.0	0.0	0.0	0.0	0.0	0.0	0.0	0.0	0.0	-1	0.0	0.0	0.0	0.0	0.0	0.0	0.0	0.0	0.0
825	826ASP	825	0.0	0.0	0.0	0.0	0.0	0.0	0.0	0.0	0.0	0.0	0.0	-1	0.0	0.0	0.0	0.0	0.0	0.0	0.0	0.0	0.0
826	827ASN	826	0.0	0.0	0.0	0.0	0.0	0.0	0.0	0.0	0.0	0.0	0.0	-1	0.0	0.0	0.0	0.0	0.0	0.0	0.0	0.0	0.0
827	828ALA	827	0.0	0.0	0.0	0.0	0.0	0.0	0.0	0.0	0.0	0.0	0.0	-1	0.0	0.0	0.0	0.0	0.0	0.0	0.0	0.0	0.0
828	829SER	828	0.0	0.0	0.0	0.0	0.0	0.0	0.0	0.0	0.0	0.0	0.0	-1	0.0	0.0	0.0	0.0	0.0	0.0	0.0	0.0	0.0
829	830ASN	829	0.0	0.0	0.0	0.0	0.0	0.0	0.0	0.0	0.0	0.0	0.0	-1	0.0	0.0	0.0	0.0	0.0	0.0	0.0	0.0	0.0
830	831SER	830	0.0	0.0	0.0	0.0	0.0	0.0	0.0	0.0	0.0	0.0	0.0	-1	0.0	0.0	0.0	0.0	0.0	0.0	0.0	0.0	0.0
831	832ASP	831	0.0	0.0	0.0	0.0	0.0	0.0	0.0	0.0	0.0	0.0	0.0	-1	0.0	0.0	0.0	0.0	0.0	0.0	0.0	0.0	0.0
832	833VAL	832	0.0	0.0	0.0	0.0	0.0	0.0	0.0	0.0	0.0	0.0	0.0	-1	0.0	0.0	0.0	0.0	0.0	0.0	0.0	0.0	0.0
833	834ASN	833	0.0	0.0	0.0	0.0	0.0	0.0	0.0	0.0	0.0	0.0	0.0	-1	0.0	0.0	0.0	0.0	0.0	0.0	0.0	0.0	0.0
834	835LYS	834	0.0	0.0	0.0	0.0	0.0	0.0	0.0	0.0	0.0	0.0	0.0	-1	0.0	0.0	0.0	0.0	0.0	0.0	0.0	0.0	0.0
835	836ILE	835	0.0	0.0	0.0	0.0	0.0	0.0	0.0	0.0	0.0	0.0	0.0	-1	0.0	0.0	0.0	0.0	0.0	0.0	0.0	0.0	0.0
836	837GLY	836	0.0	0.0	0.0	0.0	0.0	0.0	0.0	0.0	0.0	0.0	0.0	-1	0.0	0.0	0.0	0.0	0.0	0.0	0.0	0.0	0.0
837	838LYS	837	0.0	0.0	0.0	0.0	0.0	0.0	0.0	0.0	0.0	0.0	0.0	-1	0.0	0.0	0.0	0.0	0.0	0.0	0.0	0.0	0.0
838	839LYS	838	0.0	0.0	0.0	0.0	0.0	0.0	0.0	0.0	0.0	0.0	0.0	-1	0.0	0.0	0.0	0.0	0.0	0.0	0.0	0.0	0.0
839	840GLU	839	0.0	0.0	0.0	0.0	0.0	0.0	0.0	0.0	0.0	0.0	0.0	-1	0.0	0.0	0.0	0.0	0.0	0.0	0.0	0.0	0.0
840	841ASN	840	0.0	0.0	0.0	0.0	0.0	0.0	0.0	0.0	0.0	0.0	0.0	-1	0.0	0.0	0.0	0.0	0.0	0.0	0.0	0.0	0.0
841	842LYS	841	0.0	0.0	0.0	0.0	0.0	0.0	0.0	0.0	0.0	0.0	0.0	-1	0.0	0.0	0.0	0.0	0.0	0.0	0.0	0.0	0.0
842	843ASN	842	0.0	0.0	0.0	0.0	0.0	0.0	0.0	0.0	0.0	0.0	0.0	-1	0.0	0.0	0.0	0.0	0.0	0.0	0.0	0.0	0.0
843	844ASN	843	0.0	0.0	0.0	0.0	0.0	0.0	0.0	0.0	0.0	0.0	0.0	-1	0.0	0.0	0.0	0.0	0.0	0.0	0.0	0.0	0.0
844	845ASN	844	0.0	0.0	0.0	0.0	0.0	0.0	0.0	0.0	0.0	0.0	0.0	-1	0.0	0.0	0.0	0.0	0.0	0.0	0.0	0.0	0.0
845	846LYS	845	0.0	0.0	0.0	0.0	0.0	0.0	0.0	0.0	0.0	0.0	0.0	-1	0.0	0.0	0.0	0.0	0.0	0.0	0.0	0.0	0.0
846	847ASP	846	0.0	0.0	0.0	0.0	0.0	0.0	0.0	0.0	0.0	0.0	0.0	-1	0.0	0.0	0.0	0.0	0.0	0.0	0.0	0.0	0.0
847	848LYS	847	0.0	0.0	0.0	0.0	0.0	0.0	0.0	0.0	0.0	0.0	0.0	-1	0.0	0.0	0.0	0.0	0.0	0.0	0.0	0.0	0.0
848	849LYS	848	0.0	0.0	0.0	0.0	0.0	0.0	0.0	0.0	0.0	0.0	0.0	-1	0.0	0.0	0.0	0.0	0.0	0.0	0.0	0.0	0.0
849	850MET	849	0.0	0.0	0.0	0.0	0.0	0.0	0.0	0.0	0.0	0.0	0.0	-1	0.0	0.0	0.0	0.0	0.0	0.0	0.0	0.0	0.0
850	851GLY	850	0.0	0.0	0.0	0.0	0.0	0.0	0.0	0.0	0.0	0.0	0.0	-1	0.0	0.0	0.0	0.0	0.0	0.0	0.0	0.0	0.0
851	852THR	851	0.0	0.0	0.0	0.0	0.0	0.0	0.0	0.0	0.0	0.0	0.0	-1	0.0	0.0	0.0	0.0	0.0	0.0	0.0	0.0	0.0
852	853ASN	852	0.0	0.0	0.0	0.0	0.0	0.0	0.0	0.0	0.0	0.0	0.0	-1	0.0	0.0	0.0	0.0	0.0	0.0	0.0	0.0	0.0
853	854ASN	853	0.0	0.0	0.0	0.0	0.0	0.0	0.0	0.0	0.0	0.0	0.0	-1	0.0	0.0	0.0	0.0	0.0	0.0	0.0	0.0	0.0
854	855ASP	854	0.0	0.0	0.0	0.0	0.0	0.0	0.0	0.0	0.0	0.0	0.0	-1	0.0	0.0	0.0	0.0	0.0	0.0	0.0	0.0	0.0
855	856VAL	855	0.0	0.0	0.0	0.0	0.0	0.0	0.0	0.0	0.0	0.0	0.0	-1	0.0	0.0	0.0	0.0	0.0	0.0	0.0	0.0	0.0
856	857ILE	856	0.0	0.0	0.0	0.0	0.0	0.0	0.0	0.0	0.0	0.0	0.0	-1	0.0	0.0	0.0	0.0	0.0	0.0	0.0	0.0	0.0
857	858SER	857	0.0	0.0	0.0	0.0	0.0	0.0	0.0	0.0	0.0	0.0	0.0	-1	0.0	0.0	0.0	0.0	0.0	0.0	0.0	0.0	0.0
858	859CYS	858	0.0	0.0	0.0	0.0	0.0	0.0	0.0	0.0	0.0	0.0	0.0	-1	0.0	0.0	0.0	0.0	0.0	0.0	0.0	0.0	0.0
859	860GLU	859	0.0	0.0	0.0	0.0	0.0	0.0	0.0	0.0	0.0	0.0	0.0	-1	0.0	0.0	0.0	0.0	0.0	0.0	0.0	0.0	0.0
860	861ASN	860	0.0	0.0	0.0	0.0	0.0	0.0	0.0	0.0	0.0	0.0	0.0	-1	0.0	0.0	0.0	0.0	0.0	0.0	0.0	0.0	0.0
861	862THR	861	0.0	0.0	0.0	0.0	0.0	0.0	0.0	0.0	0.0	0.0	0.0	-1	0.0	0.0	0.0	0.0	0.0	0.0	0.0	0.0	0.0
862	863LYS	862	0.0	0.0	0.0	0.0	0.0	0.0	0.0	0.0	0.0	0.0	0.0	-1	0.0	0.0	0.0	0.0	0.0	0.0	0.0	0.0	0.0
863	864LYS	863	0.0	0.0	0.0	0.0	0.0	0.0	0.0	0.0	0.0	0.0	0.0	-1	0.0	0.0	0.0	0.0	0.0	0.0	0.0	0.0	0.0
864	865HIS	864	0.0	0.0	0.0	0.0	0.0	0.0	0.0	0.0	0.0	0.0	0.0	-1	0.0	0.0	0.0	0.0	0.0	0.0	0.0	0.0	0.0
865	866LYS	865	0.0	0.0	0.0	0.0	0.0	0.0	0.0	0.0	0.0	0.0	0.0	-1	0.0	0.0	0.0	0.0	0.0	0.0	0.0	0.0	0.0
866	867ILE	866	0.0	0.0	0.0	0.0	0.0	0.0	0.0	0.0	0.0	0.0	0.0	-1	0.0	0.0	0.0	0.0	0.0	0.0	0.0	0.0	0.0
867	868VAL	867	0.0	0.0	0.0	0.0	0.0	0.0	0.0	0.0	0.0	0.0	0.0	-1	0.0	0.0	0.0	0.0	0.0	0.0	0.0	0.0	0.0
868	869VAL	868	0.0	0.0	0.0	0.0	0.0	0.0	0.0	0.0	0.0	0.0	0.0	-1	0.0	0.0	0.0	0.0	0.0	0.0	0.0	0.0	0.0
869	870PHE	869	0.0	0.0	0.0	0.0	0.0	0.0	0.0	0.0	0.0	0.0	0.0	-1	0.0	0.0	0.0	0.0	0.0	0.0	0.0	0.0	0.0
870	871CYS	870	0.0	0.0	0.0	0.0	0.0	0.0	0.0	0.0	0.0	0.0	0.0	-1	0.0	0.0	0.0	0.0	0.0	0.0	0.0	0.0	0.0
871	872LYS	871	0.0	0.0	0.0	0.0	0.0	0.0	0.0	0.0	0.0	0.0	0.0	-1	0.0	0.0	0.0	0.0	0.0	0.0	0.0	0.0	0.0
872	873GLY	872	0.0	0.0	0.0	0.0	0.0	0.0	0.0	0.0	0.0	0.0	0.0	-1	0.0	0.0	0.0	0.0	0.0	0.0	0.0	0.0	0.0
873	874ALA	873	0.0	0.0	0.0	0.0	0.0	0.0	0.0	0.0	0.0	0.0	0.0	-1	0.0	0.0	0.0	0.0	0.0	0.0	0.0	0.0	0.0
874	875GLY	874	0.0	0.0	0.0	0.0	0.0	0.0	0.0	0.0	0.0	0.0	0.0	-1	0.0	0.0	0.0	0.0	0.0	0.0	0.0	0.0	0.0
875	876CYS	875	0.0	0.0	0.0	0.0	0.0	0.0	0.0	0.0	0.0	0.0	0.0	-1	0.0	0.0	0.0	0.0	0.0	0.0	0.0	0.0	0.0
876	877VAL	876	0.0	0.0	0.0	0.0	0.0	0.0	0.0	0.0	0.0	0.0	0.0	-1	0.0	0.0	0.0	0.0	0.0	0.0	0.0	0.0	0.0
877	878ILE	877	0.0	0.0	0.0	0.0	0.0	0.0	0.0	0.0	0.0	0.0	0.0	-1	0.0	0.0	0.0	0.0	0.0	0.0	0.0	0.0	0.0
878	879ILE	878	0.0	0.0	0.0	0.0	0.0	0.0	0.0	0.0	0.0	0.0	0.0	-1	0.0	0.0	0.0	0.0	0.0	0.0	0.0	0.0	0.0
879	880LYS	879	0.0	0.0	0.0	0.0	0.0	0.0	0.0	0.0	0.0	0.0	0.0	-1	0.0	0.0	0.0	0.0	0.0	0.0	0.0	0.0	0.0
880	881LYS	880	0.0	0.0	0.0	0.0	0.0	0.0	0.0	0.0	0.0	0.0	0.0	-1	0.0	0.0	0.0	0.0	0.0	0.0	0.0	0.0	0.0
881	882LEU	881	0.0	0.0	0.0	0.0	0.0	0.0	0.0	0.0	0.0	0.0	0.0	-1	0.0	0.0	0.0	0.0	0.0	0.0	0.0	0.0	0.0
882	883ALA	882	0.0	0.0	0.0	0.0	0.0	0.0	0.0	0.0	0.0	0.0	0.0	-1	0.0	0.0	0.0	0.0	0.0	0.0	0.0	0.0	0.0
883	884ASN	883	0.0	0.0	0.0	0.0	0.0	0.0	0.0	0.0	0.0	0.0	0.0	-1	0.0	0.0	0.0	0.0	0.0	0.0	0.0	0.0	0.0
884	885LYS	884	0.0	0.0	0.0	0.0	0.0	0.0	0.0	0.0	0.0	0.0	0.0	-1	0.0	0.0	0.0	0.0	0.0	0.0	0.0	0.0	0.0
885	886THR	885	0.0	0.0	0.0	0.0	0.0	0.0	0.0	0.0	0.0	0.0	0.0	-1	0.0	0.0	0.0	0.0	0.0	0.0	0.0	0.0	0.0
886	887ASP	886	0.0	0.0	0.0	0.0	0.0	0.0	0.0	0.0	0.0	0.0	0.0	-1	0.0	0.0	0.0	0.0	0.0	0.0	0.0	0.0	0.0
887	888VAL	887	0.0	0.0	0.0	0.0	0.0	0.0	0.0	0.0	0.0	0.0	0.0	-1	0.0	0.0	0.0	0.0	0.0	0.0	0.0	0.0	0.0
888	889ASP	888	0.0	0.0	0.0	0.0	0.0	0.0	0.0	0.0	0.0	0.0	0.0	-1	0.0	0.0	0.0	0.0	0.0	0.0	0.0	0.0	0.0
889	890ASP	889	0.0	0.0	0.0	0.0	0.0	0.0	0.0	0.0	0.0	0.0	0.0	-1	0.0	0.0	0.0	0.0	0.0	0.0	0.0	0.0	0.0
890	891LEU	890	0.0	0.0	0.0	0.0	0.0	0.0	0.0	0.0	0.0	0.0	0.0	-1	0.0	0.0	0.0	0.0	0.0	0.0	0.0	0.0	0.0
891	892THR	891	0.0	0.0	0.0	0.0	0.0	0.0	0.0	0.0	0.0	0.0	0.0	-1	0.0	0.0	0.0	0.0	0.0	0.0	0.0	0.0	0.0
892	893ILE	892	0.0	0.0	0.0	0.0	0.0	0.0	0.0	0.0	0.0	0.0	0.0	-1	0.0	0.0	0.0	0.0	0.0	0.0	0.0	0.0	0.0
893	894GLU	893	0.0	0.0	0.0	0.0	0.0	0.0	0.0	0.0	0.0	0.0	0.0	-1	0.0	0.0	0.0	0.0	0.0	0.0	0.0	0.0	0.0
894	895HIS	894	0.0	0.0	0.0	0.0	0.0	0.0	0.0	0.0	0.0	0.0	0.0	-1	0.0	0.0	0.0	0.0	0.0	0.0	0.0	0.0	0.0
895	896MET	895	0.0	0.0	0.0	0.0	0.0	0.0	0.0	0.0	0.0	0.0	0.0	-1	0.0	0.0	0.0	0.0	0.0	0.0	0.0	0.0	0.0
896	897GLU	896	0.0	0.0	0.0	0.0	0.0	0.0	0.0	0.0	0.0	0.0	0.0	-1	0.0	0.0	0.0	0.0	0.0	0.0	0.0	0.0	0.0
897	898THR	897	0.0	0.0	0.0	0.0	0.0	0.0	0.0	0.0	0.0	0.0	0.0	-1	0.0	0.0	0.0	0.0	0.0	0.0	0.0	0.0	0.0
898	899TYR	898	0.0	0.0	0.0	0.0	0.0	0.0	0.0	0.0	0.0	0.0	0.0	-1	0.0	0.0	0.0	0.0	0.0	0.0	0.0	0.0	0.0
899	900ALA	899	0.0	0.0	0.0	0.0	0.0	0.0	0.0	0.0	0.0	0.0	0.0	-1	0.0	0.0	0.0	0.0	0.0	0.0	0.0	0.0	0.0
900	901ASP	900	0.0	0.0	0.0	0.0	0.0	0.0	0.0	0.0	0.0	0.0	0.0	-1	0.0	0.0	0.0	0.0	0.0	0.0	0.0	0.0	0.0
901	902GLU	901	0.0	0.0	0.0	0.0	0.0	0.0	0.0	0.0	0.0	0.0	0.0	-1	0.0	0.0	0.0	0.0	0.0	0.0	0.0	0.0	0.0
902	903GLY	902	0.0	0.0	0.0	0.0	0.0	0.0	0.0	0.0	0.0	0.0	0.0	-1	0.0	0.0	0.0	0.0	0.0	0.0	0.0	0.0	0.0
903	904LEU	903	0.0	0.0	0.0	0.0	0.0	0.0	0.0	0.0	0.0	0.0	0.0	-1	0.0	0.0	0.0	0.0	0.0	0.0	0.0	0.0	0.0
904	905ARG	904	0.0	0.0	0.0	0.0	0.0	0.0	0.0	0.0	0.0	0.0	0.0	-1	0.0	0.0	0.0	0.0	0.0	0.0	0.0	0.0	0.0
905	906THR	905	0.0	0.0	0.0	0.0	0.0	0.0	0.0	0.0	0.0	0.0	0.0	-1	0.0	0.0	0.0	0.0	0.0	0.0	0.0	0.0	0.0
906	907LEU	906	0.0	0.0	0.0	0.0	0.0	0.0	0.0	0.0	0.0	0.0	0.0	-1	0.0	0.0	0.0	0.0	0.0	0.0	0.0	0.0	0.0
907	908CYS	907	0.0	0.0	0.0	0.0	0.0	0.0	0.0	0.0	0.0	0.0	0.0	-1	0.0	0.0	0.0	0.0	0.0	0.0	0.0	0.0	0.0
908	909ILE	908	0.0	0.0	0.0	0.0	0.0	0.0	0.0	0.0	0.0	0.0	0.0	-1	0.0	0.0	0.0	0.0	0.0	0.0	0.0	0.0	0.0
909	910ALA	909	0.0	0.0	0.0	0.0	0.0	0.0	0.0	0.0	0.0	0.0	0.0	-1	0.0	0.0	0.0	0.0	0.0	0.0	0.0	0.0	0.0
910	911TYR	910	0.0	0.0	0.0	0.0	0.0	0.0	0.0	0.0	0.0	0.0	0.0	-1	0.0	0.0	0.0	0.0	0.0	0.0	0.0	0.0	0.0
911	912LYS	911	0.0	0.0	0.0	0.0	0.0	0.0	0.0	0.0	0.0	0.0	0.0	-1	0.0	0.0	0.0	0.0	0.0	0.0	0.0	0.0	0.0
912	913GLU	912	0.0	0.0	0.0	0.0	0.0	0.0	0.0	0.0	0.0	0.0	0.0	-1	0.0	0.0	0.0	0.0	0.0	0.0	0.0	0.0	0.0
913	914LEU	913	0.0	0.0	0.0	0.0	0.0	0.0	0.0	0.0	0.0	0.0	0.0	-1	0.0	0.0	0.0	0.0	0.0	0.0	0.0	0.0	0.0
914	915SER	914	0.0	0.0	0.0	0.0	0.0	0.0	0.0	0.0	0.0	0.0	0.0	-1	0.0	0.0	0.0	0.0	0.0	0.0	0.0	0.0	0.0
915	916PRO	915	0.0	0.0	0.0	0.0	0.0	0.0	0.0	0.0	0.0	0.0	0.0	-1	0.0	0.0	0.0	0.0	0.0	0.0	0.0	0.0	0.0
916	917LYS	916	0.0	0.0	0.0	0.0	0.0	0.0	0.0	0.0	0.0	0.0	0.0	-1	0.0	0.0	0.0	0.0	0.0	0.0	0.0	0.0	0.0
917	918GLU	917	0.0	0.0	0.0	0.0	0.0	0.0	0.0	0.0	0.0	0.0	0.0	-1	0.0	0.0	0.0	0.0	0.0	0.0	0.0	0.0	0.0
918	919PHE	918	0.0	0.0	0.0	0.0	0.0	0.0	0.0	0.0	0.0	0.0	0.0	-1	0.0	0.0	0.0	0.0	0.0	0.0	0.0	0.0	0.0
919	920ALA	919	0.0	0.0	0.0	0.0	0.0	0.0	0.0	0.0	0.0	0.0	0.0	-1	0.0	0.0	0.0	0.0	0.0	0.0	0.0	0.0	0.0
920	921ILE	920	0.0	0.0	0.0	0.0	0.0	0.0	0.0	0.0	0.0	0.0	0.0	-1	0.0	0.0	0.0	0.0	0.0	0.0	0.0	0.0	0.0
921	922TRP	921	0.0	0.0	0.0	0.0	0.0	0.0	0.0	0.0	0.0	0.0	0.0	-1	0.0	0.0	0.0	0.0	0.0	0.0	0.0	0.0	0.0
922	923TYR	922	0.0	0.0	0.0	0.0	0.0	0.0	0.0	0.0	0.0	0.0	0.0	-1	0.0	0.0	0.0	0.0	0.0	0.0	0.0	0.0	0.0
923	924ASN	923	0.0	0.0	0.0	0.0	0.0	0.0	0.0	0.0	0.0	0.0	0.0	-1	0.0	0.0	0.0	0.0	0.0	0.0	0.0	0.0	0.0
924	925LEU	924	0.0	0.0	0.0	0.0	0.0	0.0	0.0	0.0	0.0	0.0	0.0	-1	0.0	0.0	0.0	0.0	0.0	0.0	0.0	0.0	0.0
925	926TYR	925	0.0	0.0	0.0	0.0	0.0	0.0	0.0	0.0	0.0	0.0	0.0	-1	0.0	0.0	0.0	0.0	0.0	0.0	0.0	0.0	0.0
926	927LYS	926	0.0	0.0	0.0	0.0	0.0	0.0	0.0	0.0	0.0	0.0	0.0	-1	0.0	0.0	0.0	0.0	0.0	0.0	0.0	0.0	0.0
927	928GLU	927	0.0	0.0	0.0	0.0	0.0	0.0	0.0	0.0	0.0	0.0	0.0	-1	0.0	0.0	0.0	0.0	0.0	0.0	0.0	0.0	0.0
928	929ALA	928	0.0	0.0	0.0	0.0	0.0	0.0	0.0	0.0	0.0	0.0	0.0	-1	0.0	0.0	0.0	0.0	0.0	0.0	0.0	0.0	0.0
929	930SER	929	0.0	0.0	0.0	0.0	0.0	0.0	0.0	0.0	0.0	0.0	0.0	-1	0.0	0.0	0.0	0.0	0.0	0.0	0.0	0.0	0.0
930	931LEU	930	0.0	0.0	0.0	0.0	0.0	0.0	0.0	0.0	0.0	0.0	0.0	-1	0.0	0.0	0.0	0.0	0.0	0.0	0.0	0.0	0.0
931	932SER	931	0.0	0.0	0.0	0.0	0.0	0.0	0.0	0.0	0.0	0.0	0.0	-1	0.0	0.0	0.0	0.0	0.0	0.0	0.0	0.0	0.0
932	933LEU	932	0.0	0.0	0.0	0.0	0.0	0.0	0.0	0.0	0.0	0.0	0.0	-1	0.0	0.0	0.0	0.0	0.0	0.0	0.0	0.0	0.0
933	934ASN	933	0.0	0.0	0.0	0.0	0.0	0.0	0.0	0.0	0.0	0.0	0.0	-1	0.0	0.0	0.0	0.0	0.0	0.0	0.0	0.0	0.0
934	935GLY	934	0.0	0.0	0.0	0.0	0.0	0.0	0.0	0.0	0.0	0.0	0.0	-1	0.0	0.0	0.0	0.0	0.0	0.0	0.0	0.0	0.0
935	936ARG	935	0.0	0.0	0.0	0.0	0.0	0.0	0.0	0.0	0.0	0.0	0.0	-1	0.0	0.0	0.0	0.0	0.0	0.0	0.0	0.0	0.0
936	937GLU	936	0.0	0.0	0.0	0.0	0.0	0.0	0.0	0.0	0.0	0.0	0.0	-1	0.0	0.0	0.0	0.0	0.0	0.0	0.0	0.0	0.0
937	938GLU	937	0.0	0.0	0.0	0.0	0.0	0.0	0.0	0.0	0.0	0.0	0.0	-1	0.0	0.0	0.0	0.0	0.0	0.0	0.0	0.0	0.0
938	939ASN	938	0.0	0.0	0.0	0.0	0.0	0.0	0.0	0.0	0.0	0.0	0.0	-1	0.0	0.0	0.0	0.0	0.0	0.0	0.0	0.0	0.0
939	940ILE	939	0.0	0.0	0.0	0.0	0.0	0.0	0.0	0.0	0.0	0.0	0.0	-1	0.0	0.0	0.0	0.0	0.0	0.0	0.0	0.0	0.0
940	941GLU	940	0.0	0.0	0.0	0.0	0.0	0.0	0.0	0.0	0.0	0.0	0.0	-1	0.0	0.0	0.0	0.0	0.0	0.0	0.0	0.0	0.0
941	942LYS	941	0.0	0.0	0.0	0.0	0.0	0.0	0.0	0.0	0.0	0.0	0.0	-1	0.0	0.0	0.0	0.0	0.0	0.0	0.0	0.0	0.0
942	943ILE	942	0.0	0.0	0.0	0.0	0.0	0.0	0.0	0.0	0.0	0.0	0.0	-1	0.0	0.0	0.0	0.0	0.0	0.0	0.0	0.0	0.0
943	944ALA	943	0.0	0.0	0.0	0.0	0.0	0.0	0.0	0.0	0.0	0.0	0.0	-1	0.0	0.0	0.0	0.0	0.0	0.0	0.0	0.0	0.0
944	945GLY	944	0.0	0.0	0.0	0.0	0.0	0.0	0.0	0.0	0.0	0.0	0.0	-1	0.0	0.0	0.0	0.0	0.0	0.0	0.0	0.0	0.0
945	946GLY	945	0.0	0.0	0.0	0.0	0.0	0.0	0.0	0.0	0.0	0.0	0.0	-1	0.0	0.0	0.0	0.0	0.0	0.0	0.0	0.0	0.0
946	947ILE	946	0.0	0.0	0.0	0.0	0.0	0.0	0.0	0.0	0.0	0.0	0.0	-1	0.0	0.0	0.0	0.0	0.0	0.0	0.0	0.0	0.0
947	948GLU	947	0.0	0.0	0.0	0.0	0.0	0.0	0.0	0.0	0.0	0.0	0.0	-1	0.0	0.0	0.0	0.0	0.0	0.0	0.0	0.0	0.0
948	949ASN	948	0.0	0.0	0.0	0.0	0.0	0.0	0.0	0.0	0.0	0.0	0.0	-1	0.0	0.0	0.0	0.0	0.0	0.0	0.0	0.0	0.0
949	950ASP	949	0.0	0.0	0.0	0.0	0.0	0.0	0.0	0.0	0.0	0.0	0.0	-1	0.0	0.0	0.0	0.0	0.0	0.0	0.0	0.0	0.0
950	951LEU	950	0.0	0.0	0.0	0.0	0.0	0.0	0.0	0.0	0.0	0.0	0.0	-1	0.0	0.0	0.0	0.0	0.0	0.0	0.0	0.0	0.0
951	952ILE	951	0.0	0.0	0.0	0.0	0.0	0.0	0.0	0.0	0.0	0.0	0.0	-1	0.0	0.0	0.0	0.0	0.0	0.0	0.0	0.0	0.0
952	953LEU	952	0.0	0.0	0.0	0.0	0.0	0.0	0.0	0.0	0.0	0.0	0.0	-1	0.0	0.0	0.0	0.0	0.0	0.0	0.0	0.0	0.0
953	954GLN	953	0.0	0.0	0.0	0.0	0.0	0.0	0.0	0.0	0.0	0.0	0.0	-1	0.0	0.0	0.0	0.0	0.0	0.0	0.0	0.0	0.0
954	955GLY	954	0.0	0.0	0.0	0.0	0.0	0.0	0.0	0.0	0.0	0.0	0.0	-1	0.0	0.0	0.0	0.0	0.0	0.0	0.0	0.0	0.0
955	956VAL	955	0.0	0.0	0.0	0.0	0.0	0.0	0.0	0.0	0.0	0.0	0.0	-1	0.0	0.0	0.0	0.0	0.0	0.0	0.0	0.0	0.0
956	957THR	956	0.0	0.0	0.0	0.0	0.0	0.0	0.0	0.0	0.0	0.0	0.0	-1	0.0	0.0	0.0	0.0	0.0	0.0	0.0	0.0	0.0
957	958GLY	957	0.0	0.0	0.0	0.0	0.0	0.0	0.0	0.0	0.0	0.0	0.0	-1	0.0	0.0	0.0	0.0	0.0	0.0	0.0	0.0	0.0
958	959ILE	958	0.0	0.0	0.0	0.0	0.0	0.0	0.0	0.0	0.0	0.0	0.0	-1	0.0	0.0	0.0	0.0	0.0	0.0	0.0	0.0	0.0
959	960GLU	959	0.0	0.0	0.0	0.0	0.0	0.0	0.0	0.0	0.0	0.0	0.0	-1	0.0	0.0	0.0	0.0	0.0	0.0	0.0	0.0	0.0
960	961ASP	960	0.0	0.0	0.0	0.0	0.0	0.0	0.0	0.0	0.0	0.0	0.0	-1	0.0	0.0	0.0	0.0	0.0	0.0	0.0	0.0	0.0
961	962LYS	961	0.0	0.0	0.0	0.0	0.0	0.0	0.0	0.0	0.0	0.0	0.0	-1	0.0	0.0	0.0	0.0	0.0	0.0	0.0	0.0	0.0
962	963LEU	962	0.0	0.0	0.0	0.0	0.0	0.0	0.0	0.0	0.0	0.0	0.0	-1	0.0	0.0	0.0	0.0	0.0	0.0	0.0	0.0	0.0
963	964GLN	963	0.0	0.0	0.0	0.0	0.0	0.0	0.0	0.0	0.0	0.0	0.0	-1	0.0	0.0	0.0	0.0	0.0	0.0	0.0	0.0	0.0
964	965GLU	964	0.0	0.0	0.0	0.0	0.0	0.0	0.0	0.0	0.0	0.0	0.0	-1	0.0	0.0	0.0	0.0	0.0	0.0	0.0	0.0	0.0
965	966GLY	965	0.0	0.0	0.0	0.0	0.0	0.0	0.0	0.0	0.0	0.0	0.0	-1	0.0	0.0	0.0	0.0	0.0	0.0	0.0	0.0	0.0
966	967VAL	966	0.0	0.0	0.0	0.0	0.0	0.0	0.0	0.0	0.0	0.0	0.0	-1	0.0	0.0	0.0	0.0	0.0	0.0	0.0	0.0	0.0
967	968GLY	967	0.0	0.0	0.0	0.0	0.0	0.0	0.0	0.0	0.0	0.0	0.0	-1	0.0	0.0	0.0	0.0	0.0	0.0	0.0	0.0	0.0
968	969SER	968	0.0	0.0	0.0	0.0	0.0	0.0	0.0	0.0	0.0	0.0	0.0	-1	0.0	0.0	0.0	0.0	0.0	0.0	0.0	0.0	0.0
969	970THR	969	0.0	0.0	0.0	0.0	0.0	0.0	0.0	0.0	0.0	0.0	0.0	-1	0.0	0.0	0.0	0.0	0.0	0.0	0.0	0.0	0.0
970	971ILE	970	0.0	0.0	0.0	0.0	0.0	0.0	0.0	0.0	0.0	0.0	0.0	-1	0.0	0.0	0.0	0.0	0.0	0.0	0.0	0.0	0.0
971	972GLU	971	0.0	0.0	0.0	0.0	0.0	0.0	0.0	0.0	0.0	0.0	0.0	-1	0.0	0.0	0.0	0.0	0.0	0.0	0.0	0.0	0.0
972	973ASP	972	0.0	0.0	0.0	0.0	0.0	0.0	0.0	0.0	0.0	0.0	0.0	-1	0.0	0.0	0.0	0.0	0.0	0.0	0.0	0.0	0.0
973	974LEU	973	0.0	0.0	0.0	0.0	0.0	0.0	0.0	0.0	0.0	0.0	0.0	-1	0.0	0.0	0.0	0.0	0.0	0.0	0.0	0.0	0.0
974	975ARG	974	0.0	0.0	0.0	0.0	0.0	0.0	0.0	0.0	0.0	0.0	0.0	-1	0.0	0.0	0.0	0.0	0.0	0.0	0.0	0.0	0.0
975	976LEU	975	0.0	0.0	0.0	0.0	0.0	0.0	0.0	0.0	0.0	0.0	0.0	-1	0.0	0.0	0.0	0.0	0.0	0.0	0.0	0.0	0.0
976	977ALA	976	0.0	0.0	0.0	0.0	0.0	0.0	0.0	0.0	0.0	0.0	0.0	-1	0.0	0.0	0.0	0.0	0.0	0.0	0.0	0.0	0.0
977	978GLY	977	0.0	0.0	0.0	0.0	0.0	0.0	0.0	0.0	0.0	0.0	0.0	-1	0.0	0.0	0.0	0.0	0.0	0.0	0.0	0.0	0.0
978	979ILE	978	0.0	0.0	0.0	0.0	0.0	0.0	0.0	0.0	0.0	0.0	0.0	-1	0.0	0.0	0.0	0.0	0.0	0.0	0.0	0.0	0.0
979	980HIS	979	0.0	0.0	0.0	0.0	0.0	0.0	0.0	0.0	0.0	0.0	0.0	-1	0.0	0.0	0.0	0.0	0.0	0.0	0.0	0.0	0.0
980	981VAL	980	0.0	0.0	0.0	0.0	0.0	0.0	0.0	0.0	0.0	0.0	0.0	-1	0.0	0.0	0.0	0.0	0.0	0.0	0.0	0.0	0.0
981	982TRP	981	0.0	0.0	0.0	0.0	0.0	0.0	0.0	0.0	0.0	0.0	0.0	-1	0.0	0.0	0.0	0.0	0.0	0.0	0.0	0.0	0.0
982	983MET	982	0.0	0.0	0.0	0.0	0.0	0.0	0.0	0.0	0.0	0.0	0.0	-1	0.0	0.0	0.0	0.0	0.0	0.0	0.0	0.0	0.0
983	984LEU	983	0.0	0.0	0.0	0.0	0.0	0.0	0.0	0.0	0.0	0.0	0.0	-1	0.0	0.0	0.0	0.0	0.0	0.0	0.0	0.0	0.0
984	985THR	984	0.0	0.0	0.0	0.0	0.0	0.0	0.0	0.0	0.0	0.0	0.0	-1	0.0	0.0	0.0	0.0	0.0	0.0	0.0	0.0	0.0
985	986GLY	985	0.0	0.0	0.0	0.0	0.0	0.0	0.0	0.0	0.0	0.0	0.0	-1	0.0	0.0	0.0	0.0	0.0	0.0	0.0	0.0	0.0
986	987ASP	986	0.0	0.0	0.0	0.0	0.0	0.0	0.0	0.0	0.0	0.0	0.0	-1	0.0	0.0	0.0	0.0	0.0	0.0	0.0	0.0	0.0
987	988LYS	987	0.0	0.0	0.0	0.0	0.0	0.0	0.0	0.0	0.0	0.0	0.0	-1	0.0	0.0	0.0	0.0	0.0	0.0	0.0	0.0	0.0
988	989ILE	988	0.0	0.0	0.0	0.0	0.0	0.0	0.0	0.0	0.0	0.0	0.0	-1	0.0	0.0	0.0	0.0	0.0	0.0	0.0	0.0	0.0
989	990GLU	989	0.0	0.0	0.0	0.0	0.0	0.0	0.0	0.0	0.0	0.0	0.0	-1	0.0	0.0	0.0	0.0	0.0	0.0	0.0	0.0	0.0
990	991THR	990	0.0	0.0	0.0	0.0	0.0	0.0	0.0	0.0	0.0	0.0	0.0	-1	0.0	0.0	0.0	0.0	0.0	0.0	0.0	0.0	0.0
991	992ALA	991	0.0	0.0	0.0	0.0	0.0	0.0	0.0	0.0	0.0	0.0	0.0	-1	0.0	0.0	0.0	0.0	0.0	0.0	0.0	0.0	0.0
992	993ILE	992	0.0	0.0	0.0	0.0	0.0	0.0	0.0	0.0	0.0	0.0	0.0	-1	0.0	0.0	0.0	0.0	0.0	0.0	0.0	0.0	0.0
993	994ASN	993	0.0	0.0	0.0	0.0	0.0	0.0	0.0	0.0	0.0	0.0	0.0	-1	0.0	0.0	0.0	0.0	0.0	0.0	0.0	0.0	0.0
994	995ILE	994	0.0	0.0	0.0	0.0	0.0	0.0	0.0	0.0	0.0	0.0	0.0	-1	0.0	0.0	0.0	0.0	0.0	0.0	0.0	0.0	0.0
995	996GLY	995	0.0	0.0	0.0	0.0	0.0	0.0	0.0	0.0	0.0	0.0	0.0	-1	0.0	0.0	0.0	0.0	0.0	0.0	0.0	0.0	0.0
996	997ILE	996	0.0	0.0	0.0	0.0	0.0	0.0	0.0	0.0	0.0	0.0	0.0	-1	0.0	0.0	0.0	0.0	0.0	0.0	0.0	0.0	0.0
997	998ALA	997	0.0	0.0	0.0	0.0	0.0	0.0	0.0	0.0	0.0	0.0	0.0	-1	0.0	0.0	0.0	0.0	0.0	0.0	0.0	0.0	0.0
998	999THR	998	0.0	0.0	0.0	0.0	0.0	0.0	0.0	0.0	0.0	0.0	0.0	-1	0.0	0.0	0.0	0.0	0.0	0.0	0.0	0.0	0.0
999	1000ASN	999	0.0	0.0	0.0	0.0	0.0	0.0	0.0	0.0	0.0	0.0	0.0	-1	0.0	0.0	0.0	0.0	0.0	0.0	0.0	0.0	0.0
1000	1001LEU	1000	0.0	0.0	0.0	0.0	0.0	0.0	0.0	0.0	0.0	0.0	0.0	-1	0.0	0.0	0.0	0.0	0.0	0.0	0.0	0.0	0.0
1001	1002ILE	1001	0.0	0.0	0.0	0.0	0.0	0.0	0.0	0.0	0.0	0.0	0.0	-1	0.0	0.0	0.0	0.0	0.0	0.0	0.0	0.0	0.0
1002	1003ASP	1002	0.0	0.0	0.0	0.0	0.0	0.0	0.0	0.0	0.0	0.0	0.0	-1	0.0	0.0	0.0	0.0	0.0	0.0	0.0	0.0	0.0
1003	1004ASN	1003	0.0	0.0	0.0	0.0	0.0	0.0	0.0	0.0	0.0	0.0	0.0	-1	0.0	0.0	0.0	0.0	0.0	0.0	0.0	0.0	0.0
1004	1005GLY	1004	0.0	0.0	0.0	0.0	0.0	0.0	0.0	0.0	0.0	0.0	0.0	-1	0.0	0.0	0.0	0.0	0.0	0.0	0.0	0.0	0.0
1005	1006SER	1005	0.0	0.0	0.0	0.0	0.0	0.0	0.0	0.0	0.0	0.0	0.0	-1	0.0	0.0	0.0	0.0	0.0	0.0	0.0	0.0	0.0
1006	1007GLU	1006	0.0	0.0	0.0	0.0	0.0	0.0	0.0	0.0	0.0	0.0	0.0	-1	0.0	0.0	0.0	0.0	0.0	0.0	0.0	0.0	0.0
1007	1008GLN	1007	0.0	0.0	0.0	0.0	0.0	0.0	0.0	0.0	0.0	0.0	0.0	-1	0.0	0.0	0.0	0.0	0.0	0.0	0.0	0.0	0.0
1008	1009PHE	1008	0.0	0.0	0.0	0.0	0.0	0.0	0.0	0.0	0.0	0.0	0.0	-1	0.0	0.0	0.0	0.0	0.0	0.0	0.0	0.0	0.0
1009	1010ILE	1009	0.0	0.0	0.0	0.0	0.0	0.0	0.0	0.0	0.0	0.0	0.0	-1	0.0	0.0	0.0	0.0	0.0	0.0	0.0	0.0	0.0
1010	1011TYR	1010	0.0	0.0	0.0	0.0	0.0	0.0	0.0	0.0	0.0	0.0	0.0	-1	0.0	0.0	0.0	0.0	0.0	0.0	0.0	0.0	0.0
1011	1012THR	1011	0.0	0.0	0.0	0.0	0.0	0.0	0.0	0.0	0.0	0.0	0.0	-1	0.0	0.0	0.0	0.0	0.0	0.0	0.0	0.0	0.0
1012	1013GLU	1012	0.0	0.0	0.0	0.0	0.0	0.0	0.0	0.0	0.0	0.0	0.0	-1	0.0	0.0	0.0	0.0	0.0	0.0	0.0	0.0	0.0
1013	1014GLU	1013	0.0	0.0	0.0	0.0	0.0	0.0	0.0	0.0	0.0	0.0	0.0	-1	0.0	0.0	0.0	0.0	0.0	0.0	0.0	0.0	0.0
1014	1015LEU	1014	0.0	0.0	0.0	0.0	0.0	0.0	0.0	0.0	0.0	0.0	0.0	-1	0.0	0.0	0.0	0.0	0.0	0.0	0.0	0.0	0.0
1015	1016ALA	1015	0.0	0.0	0.0	0.0	0.0	0.0	0.0	0.0	0.0	0.0	0.0	-1	0.0	0.0	0.0	0.0	0.0	0.0	0.0	0.0	0.0
1016	1017LEU	1016	0.0	0.0	0.0	0.0	0.0	0.0	0.0	0.0	0.0	0.0	0.0	-1	0.0	0.0	0.0	0.0	0.0	0.0	0.0	0.0	0.0
1017	1018SER	1017	0.0	0.0	0.0	0.0	0.0	0.0	0.0	0.0	0.0	0.0	0.0	-1	0.0	0.0	0.0	0.0	0.0	0.0	0.0	0.0	0.0
1018	1019GLU	1018	0.0	0.0	0.0	0.0	0.0	0.0	0.0	0.0	0.0	0.0	0.0	-1	0.0	0.0	0.0	0.0	0.0	0.0	0.0	0.0	0.0
1019	1020ASP	1019	0.0	0.0	0.0	0.0	0.0	0.0	0.0	0.0	0.0	0.0	0.0	-1	0.0	0.0	0.0	0.0	0.0	0.0	0.0	0.0	0.0
1020	1021LEU	1020	0.0	0.0	0.0	0.0	0.0	0.0	0.0	0.0	0.0	0.0	0.0	-1	0.0	0.0	0.0	0.0	0.0	0.0	0.0	0.0	0.0
1021	1022LEU	1021	0.0	0.0	0.0	0.0	0.0	0.0	0.0	0.0	0.0	0.0	0.0	-1	0.0	0.0	0.0	0.0	0.0	0.0	0.0	0.0	0.0
1022	1023MET	1022	0.0	0.0	0.0	0.0	0.0	0.0	0.0	0.0	0.0	0.0	0.0	-1	0.0	0.0	0.0	0.0	0.0	0.0	0.0	0.0	0.0
1023	1024LYS	1023	0.0	0.0	0.0	0.0	0.0	0.0	0.0	0.0	0.0	0.0	0.0	-1	0.0	0.0	0.0	0.0	0.0	0.0	0.0	0.0	0.0
1024	1025LYS	1024	0.0	0.0	0.0	0.0	0.0	0.0	0.0	0.0	0.0	0.0	0.0	-1	0.0	0.0	0.0	0.0	0.0	0.0	0.0	0.0	0.0
1025	1026LEU	1025	0.0	0.0	0.0	0.0	0.0	0.0	0.0	0.0	0.0	0.0	0.0	-1	0.0	0.0	0.0	0.0	0.0	0.0	0.0	0.0	0.0
1026	1027ASP	1026	0.0	0.0	0.0	0.0	0.0	0.0	0.0	0.0	0.0	0.0	0.0	-1	0.0	0.0	0.0	0.0	0.0	0.0	0.0	0.0	0.0
1027	1028GLU	1027	0.0	0.0	0.0	0.0	0.0	0.0	0.0	0.0	0.0	0.0	0.0	-1	0.0	0.0	0.0	0.0	0.0	0.0	0.0	0.0	0.0
1028	1029ASP	1028	0.0	0.0	0.0	0.0	0.0	0.0	0.0	0.0	0.0	0.0	0.0	-1	0.0	0.0	0.0	0.0	0.0	0.0	0.0	0.0	0.0
1029	1030ILE	1029	0.0	0.0	0.0	0.0	0.0	0.0	0.0	0.0	0.0	0.0	0.0	-1	0.0	0.0	0.0	0.0	0.0	0.0	0.0	0.0	0.0
1030	1031ILE	1030	0.0	0.0	0.0	0.0	0.0	0.0	0.0	0.0	0.0	0.0	0.0	-1	0.0	0.0	0.0	0.0	0.0	0.0	0.0	0.0	0.0
1031	1032TYR	1031	0.0	0.0	0.0	0.0	0.0	0.0	0.0	0.0	0.0	0.0	0.0	-1	0.0	0.0	0.0	0.0	0.0	0.0	0.0	0.0	0.0
1069	1070LEU	1069	0.0	0.0	0.0	0.0	0.0	0.0	0.0	0.0	0.0	0.0	0.0	-1	0.0	0.0	0.0	0.0	0.0	0.0	0.0	0.0	0.0
1070	1071ASP	1070	0.0	0.0	0.0	0.0	0.0	0.0	0.0	0.0	0.0	0.0	0.0	-1	0.0	0.0	0.0	0.0	0.0	0.0	0.0	0.0	0.0
1071	1072HIS	1071	0.0	0.0	0.0	0.0	0.0	0.0	0.0	0.0	0.0	0.0	0.0	-1	0.0	0.0	0.0	0.0	0.0	0.0	0.0	0.0	0.0
1072	1073ASP	1072	0.0	0.0	0.0	0.0	0.0	0.0	0.0	0.0	0.0	0.0	0.0	-1	0.0	0.0	0.0	0.0	0.0	0.0	0.0	0.0	0.0
1073	1074THR	1073	0.0	0.0	0.0	0.0	0.0	0.0	0.0	0.0	0.0	0.0	0.0	-1	0.0	0.0	0.0	0.0	0.0	0.0	0.0	0.0	0.0
1074	1075TYR	1074	0.0	0.0	0.0	0.0	0.0	0.0	0.0	0.0	0.0	0.0	0.0	-1	0.0	0.0	0.0	0.0	0.0	0.0	0.0	0.0	0.0
1075	1076LYS	1075	0.0	0.0	0.0	0.0	0.0	0.0	0.0	0.0	0.0	0.0	0.0	-1	0.0	0.0	0.0	0.0	0.0	0.0	0.0	0.0	0.0
1076	1077GLU	1076	0.0	0.0	0.0	0.0	0.0	0.0	0.0	0.0	0.0	0.0	0.0	-1	0.0	0.0	0.0	0.0	0.0	0.0	0.0	0.0	0.0
1077	1078ASP	1077	0.0	0.0	0.0	0.0	0.0	0.0	0.0	0.0	0.0	0.0	0.0	-1	0.0	0.0	0.0	0.0	0.0	0.0	0.0	0.0	0.0
1078	1079MET	1078	0.0	0.0	0.0	0.0	0.0	0.0	0.0	0.0	0.0	0.0	0.0	-1	0.0	0.0	0.0	0.0	0.0	0.0	0.0	0.0	0.0
1079	1080THR	1079	0.0	0.0	0.0	0.0	0.0	0.0	0.0	0.0	0.0	0.0	0.0	-1	0.0	0.0	0.0	0.0	0.0	0.0	0.0	0.0	0.0
1080	1081LEU	1080	0.0	0.0	0.0	0.0	0.0	0.0	0.0	0.0	0.0	0.0	0.0	-1	0.0	0.0	0.0	0.0	0.0	0.0	0.0	0.0	0.0
1081	1082ASN	1081	0.0	0.0	0.0	0.0	0.0	0.0	0.0	0.0	0.0	0.0	0.0	-1	0.0	0.0	0.0	0.0	0.0	0.0	0.0	0.0	0.0
1082	1083ASN	1082	0.0	0.0	0.0	0.0	0.0	0.0	0.0	0.0	0.0	0.0	0.0	-1	0.0	0.0	0.0	0.0	0.0	0.0	0.0	0.0	0.0
1083	1084ASN	1083	0.0	0.0	0.0	0.0	0.0	0.0	0.0	0.0	0.0	0.0	0.0	-1	0.0	0.0	0.0	0.0	0.0	0.0	0.0	0.0	0.0
1084	1085VAL	1084	0.0	0.0	0.0	0.0	0.0	0.0	0.0	0.0	0.0	0.0	0.0	-1	0.0	0.0	0.0	0.0	0.0	0.0	0.0	0.0	0.0
1085	1086LEU	1085	0.0	0.0	0.0	0.0	0.0	0.0	0.0	0.0	0.0	0.0	0.0	-1	0.0	0.0	0.0	0.0	0.0	0.0	0.0	0.0	0.0
1086	1087ILE	1086	0.0	0.0	0.0	0.0	0.0	0.0	0.0	0.0	0.0	0.0	0.0	-1	0.0	0.0	0.0	0.0	0.0	0.0	0.0	0.0	0.0
1087	1088VAL	1087	0.0	0.0	0.0	0.0	0.0	0.0	0.0	0.0	0.0	0.0	0.0	-1	0.0	0.0	0.0	0.0	0.0	0.0	0.0	0.0	0.0
1088	1089ASP	1088	0.0	0.0	0.0	0.0	0.0	0.0	0.0	0.0	0.0	0.0	0.0	-1	0.0	0.0	0.0	0.0	0.0	0.0	0.0	0.0	0.0
1089	1090GLY	1089	0.0	0.0	0.0	0.0	0.0	0.0	0.0	0.0	0.0	0.0	0.0	-1	0.0	0.0	0.0	0.0	0.0	0.0	0.0	0.0	0.0
1090	1091SER	1090	0.0	0.0	0.0	0.0	0.0	0.0	0.0	0.0	0.0	0.0	0.0	-1	0.0	0.0	0.0	0.0	0.0	0.0	0.0	0.0	0.0
1091	1092VAL	1091	0.0	0.0	0.0	0.0	0.0	0.0	0.0	0.0	0.0	0.0	0.0	-1	0.0	0.0	0.0	0.0	0.0	0.0	0.0	0.0	0.0
1092	1093LEU	1092	0.0	0.0	0.0	0.0	0.0	0.0	0.0	0.0	0.0	0.0	0.0	-1	0.0	0.0	0.0	0.0	0.0	0.0	0.0	0.0	0.0
1093	1094ASP	1093	0.0	0.0	0.0	0.0	0.0	0.0	0.0	0.0	0.0	0.0	0.0	-1	0.0	0.0	0.0	0.0	0.0	0.0	0.0	0.0	0.0
1094	1095ILE	1094	0.0	0.0	0.0	0.0	0.0	0.0	0.0	0.0	0.0	0.0	0.0	-1	0.0	0.0	0.0	0.0	0.0	0.0	0.0	0.0	0.0
1095	1096LEU	1095	0.0	0.0	0.0	0.0	0.0	0.0	0.0	0.0	0.0	0.0	0.0	-1	0.0	0.0	0.0	0.0	0.0	0.0	0.0	0.0	0.0
1096	1097LEU	1096	0.0	0.0	0.0	0.0	0.0	0.0	0.0	0.0	0.0	0.0	0.0	-1	0.0	0.0	0.0	0.0	0.0	0.0	0.0	0.0	0.0
1097	1098SER	1097	0.0	0.0	0.0	0.0	0.0	0.0	0.0	0.0	0.0	0.0	0.0	-1	0.0	0.0	0.0	0.0	0.0	0.0	0.0	0.0	0.0
1099	1100PRO	1099	0.0	0.0	0.0	0.0	0.0	0.0	0.0	0.0	0.0	0.0	0.0	-1	0.0	0.0	0.0	0.0	0.0	0.0	0.0	0.0	0.0
1100	1101PHE	1100	0.0	0.0	0.0	0.0	0.0	0.0	0.0	0.0	0.0	0.0	0.0	-1	0.0	0.0	0.0	0.0	0.0	0.0	0.0	0.0	0.0
1101	1102GLU	1101	0.0	0.0	0.0	0.0	0.0	0.0	0.0	0.0	0.0	0.0	0.0	-1	0.0	0.0	0.0	0.0	0.0	0.0	0.0	0.0	0.0
1103	1104LYS	1103	0.0	0.0	0.0	0.0	0.0	0.0	0.0	0.0	0.0	0.0	0.0	-1	0.0	0.0	0.0	0.0	0.0	0.0	0.0	0.0	0.0
1104	1105PHE	1104	0.0	0.0	0.0	0.0	0.0	0.0	0.0	0.0	0.0	0.0	0.0	-1	0.0	0.0	0.0	0.0	0.0	0.0	0.0	0.0	0.0
1106	1107TYR	1106	0.0	0.0	0.0	0.0	0.0	0.0	0.0	0.0	0.0	0.0	0.0	-1	0.0	0.0	0.0	0.0	0.0	0.0	0.0	0.0	0.0
1107	1108LEU	1107	0.0	0.0	0.0	0.0	0.0	0.0	0.0	0.0	0.0	0.0	0.0	-1	0.0	0.0	0.0	0.0	0.0	0.0	0.0	0.0	0.0
1108	1109ALA	1108	0.0	0.0	0.0	0.0	0.0	0.0	0.0	0.0	0.0	0.0	0.0	-1	0.0	0.0	0.0	0.0	0.0	0.0	0.0	0.0	0.0
1109	1110ASP	1109	0.0	0.0	0.0	0.0	0.0	0.0	0.0	0.0	0.0	0.0	0.0	-1	0.0	0.0	0.0	0.0	0.0	0.0	0.0	0.0	0.0
1110	1111LYS	1110	0.0	0.0	0.0	0.0	0.0	0.0	0.0	0.0	0.0	0.0	0.0	-1	0.0	0.0	0.0	0.0	0.0	0.0	0.0	0.0	0.0
1111	1112CYS	1111	0.0	0.0	0.0	0.0	0.0	0.0	0.0	0.0	0.0	0.0	0.0	-1	0.0	0.0	0.0	0.0	0.0	0.0	0.0	0.0	0.0
1112	1113SER	1112	0.0	0.0	0.0	0.0	0.0	0.0	0.0	0.0	0.0	0.0	0.0	-1	0.0	0.0	0.0	0.0	0.0	0.0	0.0	0.0	0.0
1113	1114SER	1113	0.0	0.0	0.0	0.0	0.0	0.0	0.0	0.0	0.0	0.0	0.0	-1	0.0	0.0	0.0	0.0	0.0	0.0	0.0	0.0	0.0
1114	1115VAL	1114	0.0	0.0	0.0	0.0	0.0	0.0	0.0	0.0	0.0	0.0	0.0	-1	0.0	0.0	0.0	0.0	0.0	0.0	0.0	0.0	0.0
1115	1116ILE	1115	0.0	0.0	0.0	0.0	0.0	0.0	0.0	0.0	0.0	0.0	0.0	-1	0.0	0.0	0.0	0.0	0.0	0.0	0.0	0.0	0.0
1116	1117CYS	1116	0.0	0.0	0.0	0.0	0.0	0.0	0.0	0.0	0.0	0.0	0.0	-1	0.0	0.0	0.0	0.0	0.0	0.0	0.0	0.0	0.0
1117	1118GLY	1117	0.0	0.0	0.0	0.0	0.0	0.0	0.0	0.0	0.0	0.0	0.0	-1	0.0	0.0	0.0	0.0	0.0	0.0	0.0	0.0	0.0
1118	1119ARG	1118	0.0	0.0	0.0	0.0	0.0	0.0	0.0	0.0	0.0	0.0	0.0	-1	0.0	0.0	0.0	0.0	0.0	0.0	0.0	0.0	0.0
1119	1120VAL	1119	0.0	0.0	0.0	0.0	0.0	0.0	0.0	0.0	0.0	0.0	0.0	-1	0.0	0.0	0.0	0.0	0.0	0.0	0.0	0.0	0.0
1120	1121SER	1120	0.0	0.0	0.0	0.0	0.0	0.0	0.0	0.0	0.0	0.0	0.0	-1	0.0	0.0	0.0	0.0	0.0	0.0	0.0	0.0	0.0
1121	1122PRO	1121	0.0	0.0	0.0	0.0	0.0	0.0	0.0	0.0	0.0	0.0	0.0	-1	0.0	0.0	0.0	0.0	0.0	0.0	0.0	0.0	0.0
1122	1123TYR	1122	0.0	0.0	0.0	0.0	0.0	0.0	0.0	0.0	0.0	0.0	0.0	-1	0.0	0.0	0.0	0.0	0.0	0.0	0.0	0.0	0.0
1123	1124GLN	1123	0.0	0.0	0.0	0.0	0.0	0.0	0.0	0.0	0.0	0.0	0.0	-1	0.0	0.0	0.0	0.0	0.0	0.0	0.0	0.0	0.0
1124	1125LYS	1124	0.0	0.0	0.0	0.0	0.0	0.0	0.0	0.0	0.0	0.0	0.0	-1	0.0	0.0	0.0	0.0	0.0	0.0	0.0	0.0	0.0
1125	1126GLY	1125	0.0	0.0	0.0	0.0	0.0	0.0	0.0	0.0	0.0	0.0	0.0	-1	0.0	0.0	0.0	0.0	0.0	0.0	0.0	0.0	0.0
1126	1127PHE	1126	0.0	0.0	0.0	0.0	0.0	0.0	0.0	0.0	0.0	0.0	0.0	-1	0.0	0.0	0.0	0.0	0.0	0.0	0.0	0.0	0.0
1127	1128ILE	1127	0.0	0.0	0.0	0.0	0.0	0.0	0.0	0.0	0.0	0.0	0.0	-1	0.0	0.0	0.0	0.0	0.0	0.0	0.0	0.0	0.0
1128	1129VAL	1128	0.0	0.0	0.0	0.0	0.0	0.0	0.0	0.0	0.0	0.0	0.0	-1	0.0	0.0	0.0	0.0	0.0	0.0	0.0	0.0	0.0
1129	1130SER	1129	0.0	0.0	0.0	0.0	0.0	0.0	0.0	0.0	0.0	0.0	0.0	-1	0.0	0.0	0.0	0.0	0.0	0.0	0.0	0.0	0.0
1130	1131SER	1130	0.0	0.0	0.0	0.0	0.0	0.0	0.0	0.0	0.0	0.0	0.0	-1	0.0	0.0	0.0	0.0	0.0	0.0	0.0	0.0	0.0
1131	1132ALA	1131	0.0	0.0	0.0	0.0	0.0	0.0	0.0	0.0	0.0	0.0	0.0	-1	0.0	0.0	0.0	0.0	0.0	0.0	0.0	0.0	0.0
1132	1133ASN	1132	0.0	0.0	0.0	0.0	0.0	0.0	0.0	0.0	0.0	0.0	0.0	-1	0.0	0.0	0.0	0.0	0.0	0.0	0.0	0.0	0.0
1135	1136LEU	1135	0.0	0.0	0.0	0.0	0.0	0.0	0.0	0.0	0.0	0.0	0.0	-1	0.0	0.0	0.0	0.0	0.0	0.0	0.0	0.0	0.0
1137	1138LYS	1137	0.0	0.0	0.0	0.0	0.0	0.0	0.0	0.0	0.0	0.0	0.0	-1	0.0	0.0	0.0	0.0	0.0	0.0	0.0	0.0	0.0
1139	1140THR	1139	0.0	0.0	0.0	0.0	0.0	0.0	0.0	0.0	0.0	0.0	0.0	-1	0.0	0.0	0.0	0.0	0.0	0.0	0.0	0.0	0.0
1140	1141LEU	1140	0.0	0.0	0.0	0.0	0.0	0.0	0.0	0.0	0.0	0.0	0.0	-1	0.0	0.0	0.0	0.0	0.0	0.0	0.0	0.0	0.0
1141	1142ALA	1141	0.0	0.0	0.0	0.0	0.0	0.0	0.0	0.0	0.0	0.0	0.0	-1	0.0	0.0	0.0	0.0	0.0	0.0	0.0	0.0	0.0
1142	1143ILE	1142	0.0	0.0	0.0	0.0	0.0	0.0	0.0	0.0	0.0	0.0	0.0	-1	0.0	0.0	0.0	0.0	0.0	0.0	0.0	0.0	0.0
1143	1144GLY	1143	0.0	0.0	0.0	0.0	0.0	0.0	0.0	0.0	0.0	0.0	0.0	-1	0.0	0.0	0.0	0.0	0.0	0.0	0.0	0.0	0.0
1144	1145ASP	1144	0.0	0.0	0.0	0.0	0.0	0.0	0.0	0.0	0.0	0.0	0.0	-1	0.0	0.0	0.0	0.0	0.0	0.0	0.0	0.0	0.0
1145	1146GLY	1145	0.0	0.0	0.0	0.0	0.0	0.0	0.0	0.0	0.0	0.0	0.0	-1	0.0	0.0	0.0	0.0	0.0	0.0	0.0	0.0	0.0
1146	1147ALA	1146	0.0	0.0	0.0	0.0	0.0	0.0	0.0	0.0	0.0	0.0	0.0	-1	0.0	0.0	0.0	0.0	0.0	0.0	0.0	0.0	0.0
1147	1148ASN	1147	0.0	0.0	0.0	0.0	0.0	0.0	0.0	0.0	0.0	0.0	0.0	-1	0.0	0.0	0.0	0.0	0.0	0.0	0.0	0.0	0.0
1148	1149ASP	1148	0.0	0.0	0.0	0.0	0.0	0.0	0.0	0.0	0.0	0.0	0.0	-1	0.0	0.0	0.0	0.0	0.0	0.0	0.0	0.0	0.0
1149	1150CYS	1149	0.0	0.0	0.0	0.0	0.0	0.0	0.0	0.0	0.0	0.0	0.0	-1	0.0	0.0	0.0	0.0	0.0	0.0	0.0	0.0	0.0
1150	1151ASN	1150	0.0	0.0	0.0	0.0	0.0	0.0	0.0	0.0	0.0	0.0	0.0	-1	0.0	0.0	0.0	0.0	0.0	0.0	0.0	0.0	0.0
1151	1152MET	1151	0.0	0.0	0.0	0.0	0.0	0.0	0.0	0.0	0.0	0.0	0.0	-1	0.0	0.0	0.0	0.0	0.0	0.0	0.0	0.0	0.0
1152	1153ILE	1152	0.0	0.0	0.0	0.0	0.0	0.0	0.0	0.0	0.0	0.0	0.0	-1	0.0	0.0	0.0	0.0	0.0	0.0	0.0	0.0	0.0
1153	1154LYS	1153	0.0	0.0	0.0	0.0	0.0	0.0	0.0	0.0	0.0	0.0	0.0	-1	0.0	0.0	0.0	0.0	0.0	0.0	0.0	0.0	0.0
1154	1155MET	1154	0.0	0.0	0.0	0.0	0.0	0.0	0.0	0.0	0.0	0.0	0.0	-1	0.0	0.0	0.0	0.0	0.0	0.0	0.0	0.0	0.0
1155	1156ALA	1155	0.0	0.0	0.0	0.0	0.0	0.0	0.0	0.0	0.0	0.0	0.0	-1	0.0	0.0	0.0	0.0	0.0	0.0	0.0	0.0	0.0
1157	1158ILE	1157	0.0	0.0	0.0	0.0	0.0	0.0	0.0	0.0	0.0	0.0	0.0	-1	0.0	0.0	0.0	0.0	0.0	0.0	0.0	0.0	0.0
1158	1159GLY	1158	0.0	0.0	0.0	0.0	0.0	0.0	0.0	0.0	0.0	0.0	0.0	-1	0.0	0.0	0.0	0.0	0.0	0.0	0.0	0.0	0.0
1159	1160ILE	1159	0.0	0.0	0.0	0.0	0.0	0.0	0.0	0.0	0.0	0.0	0.0	-1	0.0	0.0	0.0	0.0	0.0	0.0	0.0	0.0	0.0
1160	1161GLY	1160	0.0	0.0	0.0	0.0	0.0	0.0	0.0	0.0	0.0	0.0	0.0	-1	0.0	0.0	0.0	0.0	0.0	0.0	0.0	0.0	0.0
1161	1162ILE	1161	0.0	0.0	0.0	0.0	0.0	0.0	0.0	0.0	0.0	0.0	0.0	-1	0.0	0.0	0.0	0.0	0.0	0.0	0.0	0.0	0.0
1162	1163ARG	1162	0.0	0.0	0.0	0.0	0.0	0.0	0.0	0.0	0.0	0.0	0.0	-1	0.0	0.0	0.0	0.0	0.0	0.0	0.0	0.0	0.0
1163	1164GLY	1163	0.0	0.0	0.0	0.0	0.0	0.0	0.0	0.0	0.0	0.0	0.0	-1	0.0	0.0	0.0	0.0	0.0	0.0	0.0	0.0	0.0
1164	1165GLN	1164	0.0	0.0	0.0	0.0	0.0	0.0	0.0	0.0	0.0	0.0	0.0	-1	0.0	0.0	0.0	0.0	0.0	0.0	0.0	0.0	0.0
1165	1166GLU	1165	0.0	0.0	0.0	0.0	0.0	0.0	0.0	0.0	0.0	0.0	0.0	-1	0.0	0.0	0.0	0.0	0.0	0.0	0.0	0.0	0.0
1166	1167GLY	1166	0.0	0.0	0.0	0.0	0.0	0.0	0.0	0.0	0.0	0.0	0.0	-1	0.0	0.0	0.0	0.0	0.0	0.0	0.0	0.0	0.0
1167	1168VAL	1167	0.0	0.0	0.0	0.0	0.0	0.0	0.0	0.0	0.0	0.0	0.0	-1	0.0	0.0	0.0	0.0	0.0	0.0	0.0	0.0	0.0
1168	1169GLN	1168	0.0	0.0	0.0	0.0	0.0	0.0	0.0	0.0	0.0	0.0	0.0	-1	0.0	0.0	0.0	0.0	0.0	0.0	0.0	0.0	0.0
1169	1170ALA	1169	0.0	0.0	0.0	0.0	0.0	0.0	0.0	0.0	0.0	0.0	0.0	-1	0.0	0.0	0.0	0.0	0.0	0.0	0.0	0.0	0.0
1170	1171PHE	1170	0.0	0.0	0.0	0.0	0.0	0.0	0.0	0.0	0.0	0.0	0.0	-1	0.0	0.0	0.0	0.0	0.0	0.0	0.0	0.0	0.0
1171	1172ASN	1171	0.0	0.0	0.0	0.0	0.0	0.0	0.0	0.0	0.0	0.0	0.0	-1	0.0	0.0	0.0	0.0	0.0	0.0	0.0	0.0	0.0
1172	1173SER	1172	0.0	0.0	0.0	0.0	0.0	0.0	0.0	0.0	0.0	0.0	0.0	-1	0.0	0.0	0.0	0.0	0.0	0.0	0.0	0.0	0.0
1173	1174SER	1173	0.0	0.0	0.0	0.0	0.0	0.0	0.0	0.0	0.0	0.0	0.0	-1	0.0	0.0	0.0	0.0	0.0	0.0	0.0	0.0	0.0
1174	1175ASP	1174	0.0	0.0	0.0	0.0	0.0	0.0	0.0	0.0	0.0	0.0	0.0	-1	0.0	0.0	0.0	0.0	0.0	0.0	0.0	0.0	0.0
1175	1176TYR	1175	0.0	0.0	0.0	0.0	0.0	0.0	0.0	0.0	0.0	0.0	0.0	-1	0.0	0.0	0.0	0.0	0.0	0.0	0.0	0.0	0.0
1176	1177GLY	1176	0.0	0.0	0.0	0.0	0.0	0.0	0.0	0.0	0.0	0.0	0.0	-1	0.0	0.0	0.0	0.0	0.0	0.0	0.0	0.0	0.0
1177	1178ILE	1177	0.0	0.0	0.0	0.0	0.0	0.0	0.0	0.0	0.0	0.0	0.0	-1	0.0	0.0	0.0	0.0	0.0	0.0	0.0	0.0	0.0
1178	1179SER	1178	0.0	0.0	0.0	0.0	0.0	0.0	0.0	0.0	0.0	0.0	0.0	-1	0.0	0.0	0.0	0.0	0.0	0.0	0.0	0.0	0.0
1179	1180GLN	1179	0.0	0.0	0.0	0.0	0.0	0.0	0.0	0.0	0.0	0.0	0.0	-1	0.0	0.0	0.0	0.0	0.0	0.0	0.0	0.0	0.0
1180	1181PHE	1180	0.0	0.0	0.0	0.0	0.0	0.0	0.0	0.0	0.0	0.0	0.0	-1	0.0	0.0	0.0	0.0	0.0	0.0	0.0	0.0	0.0
1181	1182ARG	1181	0.0	0.0	0.0	0.0	0.0	0.0	0.0	0.0	0.0	0.0	0.0	-1	0.0	0.0	0.0	0.0	0.0	0.0	0.0	0.0	0.0
1182	1183PHE	1182	0.0	0.0	0.0	0.0	0.0	0.0	0.0	0.0	0.0	0.0	0.0	-1	0.0	0.0	0.0	0.0	0.0	0.0	0.0	0.0	0.0
1183	1184LEU	1183	0.0	0.0	0.0	0.0	0.0	0.0	0.0	0.0	0.0	0.0	0.0	-1	0.0	0.0	0.0	0.0	0.0	0.0	0.0	0.0	0.0
1184	1185ARG	1184	0.0	0.0	0.0	0.0	0.0	0.0	0.0	0.0	0.0	0.0	0.0	-1	0.0	0.0	0.0	0.0	0.0	0.0	0.0	0.0	0.0
1185	1186ASN	1185	0.0	0.0	0.0	0.0	0.0	0.0	0.0	0.0	0.0	0.0	0.0	-1	0.0	0.0	0.0	0.0	0.0	0.0	0.0	0.0	0.0
1186	1187LEU	1186	0.0	0.0	0.0	0.0	0.0	0.0	0.0	0.0	0.0	0.0	0.0	-1	0.0	0.0	0.0	0.0	0.0	0.0	0.0	0.0	0.0
1187	1188ILE	1187	0.0	0.0	0.0	0.0	0.0	0.0	0.0	0.0	0.0	0.0	0.0	-1	0.0	0.0	0.0	0.0	0.0	0.0	0.0	0.0	0.0
1188	1189LEU	1188	0.0	0.0	0.0	0.0	0.0	0.0	0.0	0.0	0.0	0.0	0.0	-1	0.0	0.0	0.0	0.0	0.0	0.0	0.0	0.0	0.0
1189	1190VAL	1189	0.0	0.0	0.0	0.0	0.0	0.0	0.0	0.0	0.0	0.0	0.0	-1	0.0	0.0	0.0	0.0	0.0	0.0	0.0	0.0	0.0
1190	1191HIS	1190	0.0	0.0	0.0	0.0	0.0	0.0	0.0	0.0	0.0	0.0	0.0	-1	0.0	0.0	0.0	0.0	0.0	0.0	0.0	0.0	0.0
1191	1192GLY	1191	0.0	0.0	0.0	0.0	0.0	0.0	0.0	0.0	0.0	0.0	0.0	-1	0.0	0.0	0.0	0.0	0.0	0.0	0.0	0.0	0.0
1192	1193ARG	1192	0.0	0.0	0.0	0.0	0.0	0.0	0.0	0.0	0.0	0.0	0.0	-1	0.0	0.0	0.0	0.0	0.0	0.0	0.0	0.0	0.0
1193	1194LEU	1193	0.0	0.0	0.0	0.0	0.0	0.0	0.0	0.0	0.0	0.0	0.0	-1	0.0	0.0	0.0	0.0	0.0	0.0	0.0	0.0	0.0
1194	1195SER	1194	0.0	0.0	0.0	0.0	0.0	0.0	0.0	0.0	0.0	0.0	0.0	-1	0.0	0.0	0.0	0.0	0.0	0.0	0.0	0.0	0.0
1195	1196TYR	1195	0.0	0.0	0.0	0.0	0.0	0.0	0.0	0.0	0.0	0.0	0.0	-1	0.0	0.0	0.0	0.0	0.0	0.0	0.0	0.0	0.0
1197	1198ARG	1197	0.0	0.0	0.0	0.0	0.0	0.0	0.0	0.0	0.0	0.0	0.0	-1	0.0	0.0	0.0	0.0	0.0	0.0	0.0	0.0	0.0
1198	1199ILE	1198	0.0	0.0	0.0	0.0	0.0	0.0	0.0	0.0	0.0	0.0	0.0	-1	0.0	0.0	0.0	0.0	0.0	0.0	0.0	0.0	0.0
1199	1200SER	1199	0.0	0.0	0.0	0.0	0.0	0.0	0.0	0.0	0.0	0.0	0.0	-1	0.0	0.0	0.0	0.0	0.0	0.0	0.0	0.0	0.0
1201	1202LEU	1201	0.0	0.0	0.0	0.0	0.0	0.0	0.0	0.0	0.0	0.0	0.0	-1	0.0	0.0	0.0	0.0	0.0	0.0	0.0	0.0	0.0
1202	1203VAL	1202	0.0	0.0	0.0	0.0	0.0	0.0	0.0	0.0	0.0	0.0	0.0	-1	0.0	0.0	0.0	0.0	0.0	0.0	0.0	0.0	0.0
1203	1204VAL	1203	0.0	0.0	0.0	0.0	0.0	0.0	0.0	0.0	0.0	0.0	0.0	-1	0.0	0.0	0.0	0.0	0.0	0.0	0.0	0.0	0.0
1205	1206MET	1205	0.0	0.0	0.0	0.0	0.0	0.0	0.0	0.0	0.0	0.0	0.0	-1	0.0	0.0	0.0	0.0	0.0	0.0	0.0	0.0	0.0
1206	1207PHE	1206	0.0	0.0	0.0	0.0	0.0	0.0	0.0	0.0	0.0	0.0	0.0	-1	0.0	0.0	0.0	0.0	0.0	0.0	0.0	0.0	0.0
1208	1209LYS	1208	0.0	0.0	0.0	0.0	0.0	0.0	0.0	0.0	0.0	0.0	0.0	-1	0.0	0.0	0.0	0.0	0.0	0.0	0.0	0.0	0.0
1209	1210ASN	1209	0.0	0.0	0.0	0.0	0.0	0.0	0.0	0.0	0.0	0.0	0.0	-1	0.0	0.0	0.0	0.0	0.0	0.0	0.0	0.0	0.0
1211	1212VAL	1211	0.0	0.0	0.0	0.0	0.0	0.0	0.0	0.0	0.0	0.0	0.0	-1	0.0	0.0	0.0	0.0	0.0	0.0	0.0	0.0	0.0
1212	1213PHE	1212	0.0	0.0	0.0	0.0	0.0	0.0	0.0	0.0	0.0	0.0	0.0	-1	0.0	0.0	0.0	0.0	0.0	0.0	0.0	0.0	0.0
1216	1217LEU	1216	0.0	0.0	0.0	0.0	0.0	0.0	0.0	0.0	0.0	0.0	0.0	-1	0.0	0.0	0.0	0.0	0.0	0.0	0.0	0.0	0.0
1220	1221GLY	1220	0.0	0.0	0.0	0.0	0.0	0.0	0.0	0.0	0.0	0.0	0.0	-1	0.0	0.0	0.0	0.0	0.0	0.0	0.0	0.0	0.0
1227	1228GLY	1227	0.0	0.0	0.0	0.0	0.0	0.0	0.0	0.0	0.0	0.0	0.0	-1	0.0	0.0	0.0	0.0	0.0	0.0	0.0	0.0	0.0
1231	1232TYR	1231	0.0	0.0	0.0	0.0	0.0	0.0	0.0	0.0	0.0	0.0	0.0	-1	0.0	0.0	0.0	0.0	0.0	0.0	0.0	0.0	0.0
1236	1237LEU	1236	0.0	0.0	0.0	0.0	0.0	0.0	0.0	0.0	0.0	0.0	0.0	-1	0.0	0.0	0.0	0.0	0.0	0.0	0.0	0.0	0.0
1240	1241ASN	1240	0.0	0.0	0.0	0.0	0.0	0.0	0.0	0.0	0.0	0.0	0.0	-1	0.0	0.0	0.0	0.0	0.0	0.0	0.0	0.0	0.0
1245	1246SER	1245	0.0	0.0	0.0	0.0	0.0	0.0	0.0	0.0	0.0	0.0	0.0	-1	0.0	0.0	0.0	0.0	0.0	0.0	0.0	0.0	0.0
1248	1249ILE	1248	0.0	0.0	0.0	0.0	0.0	0.0	0.0	0.0	0.0	0.0	0.0	-1	0.0	0.0	0.0	0.0	0.0	0.0	0.0	0.0	0.0
1251	1252LEU	1251	0.0	0.0	0.0	0.0	0.0	0.0	0.0	0.0	0.0	0.0	0.0	-1	0.0	0.0	0.0	0.0	0.0	0.0	0.0	0.0	0.0
1252	1253ALA	1252	0.0	0.0	0.0	0.0	0.0	0.0	0.0	0.0	0.0	0.0	0.0	-1	0.0	0.0	0.0	0.0	0.0	0.0	0.0	0.0	0.0
1255	1256ASP	1255	0.01	0.0	0.03998400639744103	0.0	1.0	0.0	0.0	0.0	-0.00040016006402532334	0.0	-0.00040016006402532334	-1	0.0	0.0	0.0	0.0	0.0	0.0	0.0	0.0	0.0
1258	1259VAL	1258	0.0	0.0	0.0	0.0	0.0	0.0	0.0	0.0	0.0	0.0	0.0	-1	0.0	0.0	0.0	0.0	0.0	0.0	0.0	0.0	0.0
1260	1261ILE	1260	0.0	0.0	0.0	0.0	0.0	0.0	0.0	0.0	0.0	0.0	0.0	-1	0.0	0.0	0.0	0.0	0.0	0.0	0.0	0.0	0.0
1261	1262ASN	1261	0.0	0.0	0.0	0.0	0.0	0.0	0.0	0.0	0.0	0.0	0.0	-1	0.0	0.0	0.0	0.0	0.0	0.0	0.0	0.0	0.0
1262	1263THR	1262	0.0	0.0	0.0	0.0	0.0	0.0	0.0	0.0	0.0	0.0	0.0	-1	0.0	0.0	0.0	0.0	0.0	0.0	0.0	0.0	0.0
1263	1264ALA	1263	0.0	0.0	0.0	0.0	0.0	0.0	0.0	0.0	0.0	0.0	0.0	-1	0.0	0.0	0.0	0.0	0.0	0.0	0.0	0.0	0.0
1264	1265LEU	1264	0.0	0.0	0.0	0.0	0.0	0.0	0.0	0.0	0.0	0.0	0.0	-1	0.0	0.0	0.0	0.0	0.0	0.0	0.0	0.0	0.0
1265	1266LYS	1265	0.0	0.0	0.0	0.0	0.0	0.0	0.0	0.0	0.0	0.0	0.0	-1	0.0	0.0	0.0	0.0	0.0	0.0	0.0	0.0	0.0
1266	1267ASN	1266	0.0	0.0	0.0	0.0	0.0	0.0	0.0	0.0	0.0	0.0	0.0	-1	0.0	0.0	0.0	0.0	0.0	0.0	0.0	0.0	0.0
1267	1268PRO	1267	0.0	0.0	0.0	0.0	0.0	0.0	0.0	0.0	0.0	0.0	0.0	-1	0.0	0.0	0.0	0.0	0.0	0.0	0.0	0.0	0.0
1268	1269CYS	1268	0.0	0.0	0.0	0.0	0.0	0.0	0.0	0.0	0.0	0.0	0.0	-1	0.0	0.0	0.0	0.0	0.0	0.0	0.0	0.0	0.0
1269	1270LEU	1269	0.0	0.0	0.0	0.0	0.0	0.0	0.0	0.0	0.0	0.0	0.0	-1	0.0	0.0	0.0	0.0	0.0	0.0	0.0	0.0	0.0
1270	1271TYR	1270	0.0	0.0	0.0	0.0	0.0	0.0	0.0	0.0	0.0	0.0	0.0	-1	0.0	0.0	0.0	0.0	0.0	0.0	0.0	0.0	0.0
1271	1272LYS	1271	0.0	0.0	0.0	0.0	0.0	0.0	0.0	0.0	0.0	0.0	0.0	-1	0.0	0.0	0.0	0.0	0.0	0.0	0.0	0.0	0.0
1273	1274GLY	1273	0.0	0.0	0.0	0.0	0.0	0.0	0.0	0.0	0.0	0.0	0.0	-1	0.0	0.0	0.0	0.0	0.0	0.0	0.0	0.0	0.0
1298	1299VAL	1298	0.0	0.0	0.0	0.0	0.0	0.0	0.0	0.0	0.0	0.0	0.0	-1	0.0	0.0	0.0	0.0	0.0	0.0	0.0	0.0	0.0
1323	1324SER	1323	0.0	0.0	0.0	0.0	0.0	0.0	0.0	0.0	0.0	0.0	0.0	-1	0.0	0.0	0.0	0.0	0.0	0.0	0.0	0.0	0.0
1324	1325ILE	1324	0.0	0.0	0.0	0.0	0.0	0.0	0.0	0.0	0.0	0.0	0.0	-1	0.0	0.0	0.0	0.0	0.0	0.0	0.0	0.0	0.0
1325	1326GLY	1325	0.0	0.0	0.0	0.0	0.0	0.0	0.0	0.0	0.0	0.0	0.0	-1	0.0	0.0	0.0	0.0	0.0	0.0	0.0	0.0	0.0
1328	1329THR	1328	0.0	0.0	0.0	0.0	0.0	0.0	0.0	0.0	0.0	0.0	0.0	-1	0.0	0.0	0.0	0.0	0.0	0.0	0.0	0.0	0.0
1329	1330TYR	1329	0.0	0.0	0.0	0.0	0.0	0.0	0.0	0.0	0.0	0.0	0.0	-1	0.0	0.0	0.0	0.0	0.0	0.0	0.0	0.0	0.0
1332	1333SER	1332	0.0	0.0	0.0	0.0	0.0	0.0	0.0	0.0	0.0	0.0	0.0	-1	0.0	0.0	0.0	0.0	0.0	0.0	0.0	0.0	0.0
1333	1334VAL	1333	0.0	0.0	0.0	0.0	0.0	0.0	0.0	0.0	0.0	0.0	0.0	-1	0.0	0.0	0.0	0.0	0.0	0.0	0.0	0.0	0.0
1335	1336ILE	1335	0.0	0.0	0.0	0.0	0.0	0.0	0.0	0.0	0.0	0.0	0.0	-1	0.0	0.0	0.0	0.0	0.0	0.0	0.0	0.0	0.0
1336	1337VAL	1336	0.0	0.0	0.0	0.0	0.0	0.0	0.0	0.0	0.0	0.0	0.0	-1	0.0	0.0	0.0	0.0	0.0	0.0	0.0	0.0	0.0
1337	1338ASN	1337	0.0	0.0	0.0	0.0	0.0	0.0	0.0	0.0	0.0	0.0	0.0	-1	0.0	0.0	0.0	0.0	0.0	0.0	0.0	0.0	0.0
1340	1341ILE	1340	0.0	0.0	0.0	0.0	0.0	0.0	0.0	0.0	0.0	0.0	0.0	-1	0.0	0.0	0.0	0.0	0.0	0.0	0.0	0.0	0.0
1355	1356VAL	1355	0.0	0.0	0.0	0.0	0.0	0.0	0.0	0.0	0.0	0.0	0.0	-1	0.0	0.0	0.0	0.0	0.0	0.0	0.0	0.0	0.0
1421	1422ALA	1421	0.0	0.0	0.0	0.0	0.0	0.0	0.0	0.0	0.0	0.0	0.0	-1	0.0	0.0	0.0	0.0	0.0	0.0	0.0	0.0	0.0
1422	1423TYR	1422	0.0	0.0	0.0	0.0	0.0	0.0	0.0	0.0	0.0	0.0	0.0	-1	0.0	0.0	0.0	0.0	0.0	0.0	0.0	0.0	0.0
1423	1424HIS	1423	0.0	0.0	0.0	0.0	0.0	0.0	0.0	0.0	0.0	0.0	0.0	-1	0.0	0.0	0.0	0.0	0.0	0.0	0.0	0.0	0.0
1424	1425LEU	1424	0.0	0.0	0.0	0.0	0.0	0.0	0.0	0.0	0.0	0.0	0.0	-1	0.0	0.0	0.0	0.0	0.0	0.0	0.0	0.0	0.0
1425	1426LEU	1425	0.0	0.0	0.0	0.0	0.0	0.0	0.0	0.0	0.0	0.0	0.0	-1	0.0	0.0	0.0	0.0	0.0	0.0	0.0	0.0	0.0
1426	1427GLN	1426	0.0	0.0	0.0	0.0	0.0	0.0	0.0	0.0	0.0	0.0	0.0	-1	0.0	0.0	0.0	0.0	0.0	0.0	0.0	0.0	0.0
1427	1428ASP	1427	0.0	0.0	0.0	0.0	0.0	0.0	0.0	0.0	0.0	0.0	0.0	-1	0.0	0.0	0.0	0.0	0.0	0.0	0.0	0.0	0.0
1428	1429GLU	1428	0.0	0.0	0.0	0.0	0.0	0.0	0.0	0.0	0.0	0.0	0.0	-1	0.0	0.0	0.0	0.0	0.0	0.0	0.0	0.0	0.0
1429	1430GLU	1429	0.0	0.0	0.0	0.0	0.0	0.0	0.0	0.0	0.0	0.0	0.0	-1	0.0	0.0	0.0	0.0	0.0	0.0	0.0	0.0	0.0
1430	1431ASP	1430	0.0	0.0	0.0	0.0	0.0	0.0	0.0	0.0	0.0	0.0	0.0	-1	0.0	0.0	0.0	0.0	0.0	0.0	0.0	0.0	0.0
1431	1432LYS	1431	0.0	0.0	0.0	0.0	0.0	0.0	0.0	0.0	0.0	0.0	0.0	-1	0.0	0.0	0.0	0.0	0.0	0.0	0.0	0.0	0.0
1432	1433ILE	1432	0.0	0.0	0.0	0.0	0.0	0.0	0.0	0.0	0.0	0.0	0.0	-1	0.0	0.0	0.0	0.0	0.0	0.0	0.0	0.0	0.0
1433	1434GLU	1433	0.0	0.0	0.0	0.0	0.0	0.0	0.0	0.0	0.0	0.0	0.0	-1	0.0	0.0	0.0	0.0	0.0	0.0	0.0	0.0	0.0
1434	1435ASN	1434	0.0	0.0	0.0	0.0	0.0	0.0	0.0	0.0	0.0	0.0	0.0	-1	0.0	0.0	0.0	0.0	0.0	0.0	0.0	0.0	0.0
1435	1436PRO	1435	0.0	0.0	0.0	0.0	0.0	0.0	0.0	0.0	0.0	0.0	0.0	-1	0.0	0.0	0.0	0.0	0.0	0.0	0.0	0.0	0.0
1436	1437LYS	1436	0.0	0.0	0.0	0.0	0.0	0.0	0.0	0.0	0.0	0.0	0.0	-1	0.0	0.0	0.0	0.0	0.0	0.0	0.0	0.0	0.0
1437	1438ASN	1437	0.0	0.0	0.0	0.0	0.0	0.0	0.0	0.0	0.0	0.0	0.0	-1	0.0	0.0	0.0	0.0	0.0	0.0	0.0	0.0	0.0
1438	1439ILE	1438	0.0	0.0	0.0	0.0	0.0	0.0	0.0	0.0	0.0	0.0	0.0	-1	0.0	0.0	0.0	0.0	0.0	0.0	0.0	0.0	0.0
1439	1440GLN	1439	0.0	0.0	0.0	0.0	0.0	0.0	0.0	0.0	0.0	0.0	0.0	-1	0.0	0.0	0.0	0.0	0.0	0.0	0.0	0.0	0.0
1440	1441HIS	1440	0.0	0.0	0.0	0.0	0.0	0.0	0.0	0.0	0.0	0.0	0.0	-1	0.0	0.0	0.0	0.0	0.0	0.0	0.0	0.0	0.0
1441	1442ASN	1441	0.0	0.0	0.0	0.0	0.0	0.0	0.0	0.0	0.0	0.0	0.0	-1	0.0	0.0	0.0	0.0	0.0	0.0	0.0	0.0	0.0
1442	1443SER	1442	0.0	0.0	0.0	0.0	0.0	0.0	0.0	0.0	0.0	0.0	0.0	-1	0.0	0.0	0.0	0.0	0.0	0.0	0.0	0.0	0.0
1443	1444ARG	1443	0.0	0.0	0.0	0.0	0.0	0.0	0.0	0.0	0.0	0.0	0.0	-1	0.0	0.0	0.0	0.0	0.0	0.0	0.0	0.0	0.0
1444	1445SER	1444	0.0	0.0	0.0	0.0	0.0	0.0	0.0	0.0	0.0	0.0	0.0	-1	0.0	0.0	0.0	0.0	0.0	0.0	0.0	0.0	0.0
1445	1446SER	1445	0.0	0.0	0.0	0.0	0.0	0.0	0.0	0.0	0.0	0.0	0.0	-1	0.0	0.0	0.0	0.0	0.0	0.0	0.0	0.0	0.0
1446	1447ASN	1446	0.0	0.0	0.0	0.0	0.0	0.0	0.0	0.0	0.0	0.0	0.0	-1	0.0	0.0	0.0	0.0	0.0	0.0	0.0	0.0	0.0
1447	1448ASN	1447	0.0	0.0	0.0	0.0	0.0	0.0	0.0	0.0	0.0	0.0	0.0	-1	0.0	0.0	0.0	0.0	0.0	0.0	0.0	0.0	0.0
1448	1449ILE	1448	0.0	0.0	0.0	0.0	0.0	0.0	0.0	0.0	0.0	0.0	0.0	-1	0.0	0.0	0.0	0.0	0.0	0.0	0.0	0.0	0.0
1449	1450GLU	1449	0.0	0.0	0.0	0.0	0.0	0.0	0.0	0.0	0.0	0.0	0.0	-1	0.0	0.0	0.0	0.0	0.0	0.0	0.0	0.0	0.0
1450	1451GLU	1450	0.0	0.0	0.0	0.0	0.0	0.0	0.0	0.0	0.0	0.0	0.0	-1	0.0	0.0	0.0	0.0	0.0	0.0	0.0	0.0	0.0
1451	1452MET	1451	0.0	0.0	0.0	0.0	0.0	0.0	0.0	0.0	0.0	0.0	0.0	-1	0.0	0.0	0.0	0.0	0.0	0.0	0.0	0.0	0.0
1452	1453LYS	1452	0.0	0.0	0.0	0.0	0.0	0.0	0.0	0.0	0.0	0.0	0.0	-1	0.0	0.0	0.0	0.0	0.0	0.0	0.0	0.0	0.0
1453	1454PRO	1453	0.0	0.0	0.0	0.0	0.0	0.0	0.0	0.0	0.0	0.0	0.0	-1	0.0	0.0	0.0	0.0	0.0	0.0	0.0	0.0	0.0
1454	1455SER	1454	0.0	0.0	0.0	0.0	0.0	0.0	0.0	0.0	0.0	0.0	0.0	-1	0.0	0.0	0.0	0.0	0.0	0.0	0.0	0.0	0.0
1455	1456LYS	1455	0.0	0.0	0.0	0.0	0.0	0.0	0.0	0.0	0.0	0.0	0.0	-1	0.0	0.0	0.0	0.0	0.0	0.0	0.0	0.0	0.0
1456	1457SER	1456	0.0	0.0	0.0	0.0	0.0	0.0	0.0	0.0	0.0	0.0	0.0	-1	0.0	0.0	0.0	0.0	0.0	0.0	0.0	0.0	0.0
1457	1458GLU	1457	0.0	0.0	0.0	0.0	0.0	0.0	0.0	0.0	0.0	0.0	0.0	-1	0.0	0.0	0.0	0.0	0.0	0.0	0.0	0.0	0.0
1458	1459LEU	1458	0.0	0.0	0.0	0.0	0.0	0.0	0.0	0.0	0.0	0.0	0.0	-1	0.0	0.0	0.0	0.0	0.0	0.0	0.0	0.0	0.0
1459	1460MET	1459	0.0	0.0	0.0	0.0	0.0	0.0	0.0	0.0	0.0	0.0	0.0	-1	0.0	0.0	0.0	0.0	0.0	0.0	0.0	0.0	0.0
1460	1461GLY	1460	0.0	0.0	0.0	0.0	0.0	0.0	0.0	0.0	0.0	0.0	0.0	-1	0.0	0.0	0.0	0.0	0.0	0.0	0.0	0.0	0.0
1461	1462TYR	1461	0.0	0.0	0.0	0.0	0.0	0.0	0.0	0.0	0.0	0.0	0.0	-1	0.0	0.0	0.0	0.0	0.0	0.0	0.0	0.0	0.0
1462	1463ALA	1462	0.0	0.0	0.0	0.0	0.0	0.0	0.0	0.0	0.0	0.0	0.0	-1	0.0	0.0	0.0	0.0	0.0	0.0	0.0	0.0	0.0
1463	1464PHE	1463	0.0	0.0	0.0	0.0	0.0	0.0	0.0	0.0	0.0	0.0	0.0	-1	0.0	0.0	0.0	0.0	0.0	0.0	0.0	0.0	0.0
1464	1465SER	1464	0.0	0.0	0.0	0.0	0.0	0.0	0.0	0.0	0.0	0.0	0.0	-1	0.0	0.0	0.0	0.0	0.0	0.0	0.0	0.0	0.0
1465	1466GLU	1465	0.0	0.0	0.0	0.0	0.0	0.0	0.0	0.0	0.0	0.0	0.0	-1	0.0	0.0	0.0	0.0	0.0	0.0	0.0	0.0	0.0
1466	1467ALA	1466	0.0	0.0	0.0	0.0	0.0	0.0	0.0	0.0	0.0	0.0	0.0	-1	0.0	0.0	0.0	0.0	0.0	0.0	0.0	0.0	0.0
1467	1468ASP	1467	0.0	0.0	0.0	0.0	0.0	0.0	0.0	0.0	0.0	0.0	0.0	-1	0.0	0.0	0.0	0.0	0.0	0.0	0.0	0.0	0.0
1468	1469PRO	1468	0.0	0.0	0.0	0.0	0.0	0.0	0.0	0.0	0.0	0.0	0.0	-1	0.0	0.0	0.0	0.0	0.0	0.0	0.0	0.0	0.0
1469	1470VAL	1469	0.0	0.0	0.0	0.0	0.0	0.0	0.0	0.0	0.0	0.0	0.0	-1	0.0	0.0	0.0	0.0	0.0	0.0	0.0	0.0	0.0
1470	1471CYS	1470	0.0	0.0	0.0	0.0	0.0	0.0	0.0	0.0	0.0	0.0	0.0	-1	0.0	0.0	0.0	0.0	0.0	0.0	0.0	0.0	0.0
1471	1472VAL	1471	0.0	0.0	0.0	0.0	0.0	0.0	0.0	0.0	0.0	0.0	0.0	-1	0.0	0.0	0.0	0.0	0.0	0.0	0.0	0.0	0.0
1472	1473ASN	1472	0.0	0.0	0.0	0.0	0.0	0.0	0.0	0.0	0.0	0.0	0.0	-1	0.0	0.0	0.0	0.0	0.0	0.0	0.0	0.0	0.0
1473	1474PHE	1473	0.0	0.0	0.0	0.0	0.0	0.0	0.0	0.0	0.0	0.0	0.0	-1	0.0	0.0	0.0	0.0	0.0	0.0	0.0	0.0	0.0
1474	1475ILE	1474	0.0	0.0	0.0	0.0	0.0	0.0	0.0	0.0	0.0	0.0	0.0	-1	0.0	0.0	0.0	0.0	0.0	0.0	0.0	0.0	0.0
1475	1476ARG	1475	0.0	0.0	0.0	0.0	0.0	0.0	0.0	0.0	0.0	0.0	0.0	-1	0.0	0.0	0.0	0.0	0.0	0.0	0.0	0.0	0.0
1476	1477LYS	1476	0.0	0.0	0.0	0.0	0.0	0.0	0.0	0.0	0.0	0.0	0.0	-1	0.0	0.0	0.0	0.0	0.0	0.0	0.0	0.0	0.0
1477	1478GLN	1477	0.0	0.0	0.0	0.0	0.0	0.0	0.0	0.0	0.0	0.0	0.0	-1	0.0	0.0	0.0	0.0	0.0	0.0	0.0	0.0	0.0
1478	1479ASP	1478	0.0	0.0	0.0	0.0	0.0	0.0	0.0	0.0	0.0	0.0	0.0	-1	0.0	0.0	0.0	0.0	0.0	0.0	0.0	0.0	0.0
1479	1480LYS	1479	0.0	0.0	0.0	0.0	0.0	0.0	0.0	0.0	0.0	0.0	0.0	-1	0.0	0.0	0.0	0.0	0.0	0.0	0.0	0.0	0.0
1480	1481LEU	1480	0.0	0.0	0.0	0.0	0.0	0.0	0.0	0.0	0.0	0.0	0.0	-1	0.0	0.0	0.0	0.0	0.0	0.0	0.0	0.0	0.0
1481	1482ILE	1481	0.0	0.0	0.0	0.0	0.0	0.0	0.0	0.0	0.0	0.0	0.0	-1	0.0	0.0	0.0	0.0	0.0	0.0	0.0	0.0	0.0

## Sheet: Replica_3PyLipid_dataset
Columna1	Residue	Residue ID	Duration	Duration std	Occupancy	Occupancy std	Lipid Count	Lipid Count std	Koff	Residence Time	R Squared	Koff Bootstrap avg	R Squared Bootstrap avg	Binding Site ID	Binding Site Duration	Binding Site Occupancy	Binding Site Lipid Count	Binding Site Koff	Binding Site Koff Bootstrap avg	Binding Site Residence Time	Binding Site R Squared	Binding Site R Squared Bootstrap avg	Binding Site Pose RMSD
1406	1407ARG	1406	0.12557620817843868	0.9774791865699463	81.7672930827669	0.0	1.2464547677261613	0.0	0.16236558897385037	6.158940489299454	0.9278901365998308	2.7017499686576776	0.934345023114526	10	0.07953168044077134	98.00079968012795	2.0530395756833943	0.03988038177365462	1.0168763974168964	25.0	0.5946872160441887	0.6587758831295603	0.48797559523242945
1294	1295HIS	1294	3.776666666666667	5.086916769736087	53.8984406237505	0.0	1.0007418397626113	0.0	0.17089651825186405	5.851494285718676	0.9274226455792094	0.17356284378433703	0.9218465093501192	10	0.07953168044077134	98.00079968012795	2.0530395756833943	0.03988038177365462	1.0168763974168964	25.0	0.5946872160441887	0.6587758831295603	0.48797559523242945
1287	1288TRP	1287	0.24231343283582088	1.14221695548685	69.93202718912436	0.0	1.205260148656375	0.0	0.2278496873477005	4.388858337444158	0.9797355643242497	0.21391957726317923	0.9621708728007633	10	0.07953168044077134	98.00079968012795	2.0530395756833943	0.03988038177365462	1.0168763974168964	25.0	0.5946872160441887	0.6587758831295603	0.48797559523242945
1339	1340LYS	1339	3.2428571428571433	3.435440143502989	53.65853658536585	0.0	1.0	0.0	0.2681625507360474	3.729081474110458	0.9685004492430046	0.46310772258802013	0.9646550764692222	10	0.07953168044077134	98.00079968012795	2.0530395756833943	0.03988038177365462	1.0168763974168964	25.0	0.5946872160441887	0.6587758831295603	0.48797559523242945
1290	1291ASN	1290	0.2306666666666667	0.9504292987128775	56.69732107157137	0.0	1.1332863187588151	0.0	0.3265330553979813	3.0624770860677226	0.9879340804790144	0.4445469762954152	0.9799221417426709	10	0.07953168044077134	98.00079968012795	2.0530395756833943	0.03988038177365462	1.0168763974168964	25.0	0.5946872160441887	0.6587758831295603	0.48797559523242945
1403	1404ALA	1403	1.2405555555555554	1.712569454300312	40.863654538184726	0.0	1.0	0.0	0.48819614751166984	2.0483570079300883	0.9925474354505606	0.618957416554631	0.9895331523024	10	0.07953168044077134	98.00079968012795	2.0530395756833943	0.03988038177365462	1.0168763974168964	25.0	0.5946872160441887	0.6587758831295603	0.48797559523242945
1293	1294PHE	1293	0.1371153846153846	0.6413163642026319	76.96921231507397	0.0	1.298181818181818	0.0	0.49484243063856215	2.020845299602875	0.9864462442944982	0.6626755843534318	0.9705831731432235	10	0.07953168044077134	98.00079968012795	2.0530395756833943	0.03988038177365462	1.0168763974168964	25.0	0.5946872160441887	0.6587758831295603	0.48797559523242945
1407	1408ASP	1407	1.4075000000000002	1.7220935659829868	38.744502199120355	0.0	1.0	0.0	0.5308276743115291	1.8838505383069493	0.9852185179796124	0.515758389377342	0.9860292730292896	10	0.07953168044077134	98.00079968012795	2.0530395756833943	0.03988038177365462	1.0168763974168964	25.0	0.5946872160441887	0.6587758831295603	0.48797559523242945
1207	1208TYR	1207	0.9199999999999999	0.9567044127280554	24.91003598560576	0.0	1.0	0.0	0.630889814981414	1.5850628370493822	0.9964152213416022	1.1016349809706574	0.9918245357342149	10	0.07953168044077134	98.00079968012795	2.0530395756833943	0.03988038177365462	1.0168763974168964	25.0	0.5946872160441887	0.6587758831295603	0.48797559523242945
1405	1406THR	1405	0.0626896551724138	0.14450194369649497	53.0187924830068	0.0	1.138763197586727	0.0	0.6848315780007946	1.46021303941513	0.9911582249910543	2.3240127298502005	0.9931762880152231	10	0.07953168044077134	98.00079968012795	2.0530395756833943	0.03988038177365462	1.0168763974168964	25.0	0.5946872160441887	0.6587758831295603	0.48797559523242945
1297	1298LEU	1297	0.18546218487394958	0.31972873980518424	50.41983206717313	0.0	1.0229976209357652	0.0	1.782875419266957	0.560891686089406	0.9983423419280576	2.1176289726184776	0.996700157873933	10	0.07953168044077134	98.00079968012795	2.0530395756833943	0.03988038177365462	1.0168763974168964	25.0	0.5946872160441887	0.6587758831295603	0.48797559523242945
1278	1279TYR	1278	0.0971656050955414	0.22046258105405558	64.09436225509796	0.0	1.2002495321272615	0.0	2.2897659632311784	0.43672585585509394	0.9992764357613941	1.8240266794763251	0.9963343413497114	10	0.07953168044077134	98.00079968012795	2.0530395756833943	0.03988038177365462	1.0168763974168964	25.0	0.5946872160441887	0.6587758831295603	0.48797559523242945
1279	1280PHE	1279	0.32393939393939397	0.3727168020209494	44.86205517792883	0.0	1.0	0.0	2.483008967907593	0.4027371680589177	0.9984342465469098	1.7985027422314002	0.9970088072142461	10	0.07953168044077134	98.00079968012795	2.0530395756833943	0.03988038177365462	1.0168763974168964	25.0	0.5946872160441887	0.6587758831295603	0.48797559523242945
1402	1403ALA	1402	0.11885245901639346	0.19929738627742552	37.624950019992006	0.0	1.0276301806588735	0.0	4.097186687653425	0.24406991339043144	0.9978702694976127	3.547750013974465	0.9987062657018481	10	0.07953168044077134	98.00079968012795	2.0530395756833943	0.03988038177365462	1.0168763974168964	25.0	0.5946872160441887	0.6587758831295603	0.48797559523242945
1404	1405LEU	1404	0.11574999999999999	0.1802149757928014	28.988404638144743	0.0	1.053793103448276	0.0	4.297600001191102	0.2326880118491355	0.9997140557152681	3.8520483299082984	0.9990490717985934	10	0.07953168044077134	98.00079968012795	2.0530395756833943	0.03988038177365462	1.0168763974168964	25.0	0.5946872160441887	0.6587758831295603	0.48797559523242945
1343	1344GLU	1343	0.14740157480314967	0.15858732956917523	30.347860855657736	0.0	1.0	0.0	5.989928720947252	0.16694689479407682	0.999938463448816	4.344717004272963	0.9995332503659375	10	0.07953168044077134	98.00079968012795	2.0530395756833943	0.03988038177365462	1.0168763974168964	25.0	0.5946872160441887	0.6587758831295603	0.48797559523242945
1410	1411TYR	1410	0.04936213991769547	0.05826543249841484	45.58176729308277	0.0	1.1657894736842105	0.0	8.372246954977303	0.11944224834475287	0.9994774907078025	12.421759177839762	0.9994861905388799	10	0.07953168044077134	98.00079968012795	2.0530395756833943	0.03988038177365462	1.0168763974168964	25.0	0.5946872160441887	0.6587758831295603	0.48797559523242945
1200	1201LYS	1200	0.026947368421052626	0.020778211473131192	4.358256697321072	0.0	1.0	0.0	8.574386007681644	0.11662642655743714	0.9997961356104941	34.07479598313902	0.9994619256544215	10	0.07953168044077134	98.00079968012795	2.0530395756833943	0.03988038177365462	1.0168763974168964	25.0	0.5946872160441887	0.6587758831295603	0.48797559523242945
1414	1415LYS	1414	0.01972222222222222	0.01843197369575455	10.755697720911636	0.0	1.0185873605947955	0.0	21.965038790846215	0.0455268943306735	0.9997807948130785	28.452004457572787	0.9995494645717671	10	0.07953168044077134	98.00079968012795	2.0530395756833943	0.03988038177365462	1.0168763974168964	25.0	0.5946872160441887	0.6587758831295603	0.48797559523242945
1304	1305TYR	1304	0.016826923076923076	0.01184280776086269	15.673730507796881	0.0	1.0229591836734695	0.0	23.486706770908125	0.04257727614833821	0.9998675519106507	32.63209661161396	0.9998519454126656	10	0.07953168044077134	98.00079968012795	2.0530395756833943	0.03988038177365462	1.0168763974168964	25.0	0.5946872160441887	0.6587758831295603	0.48797559523242945
1296	1297LEU	1296	0.029251207729468598	0.02892885970207195	24.99000399840064	0.0	1.0352	0.0	34.522286837074226	0.028966794833709526	0.9977907134612722	30.48923923368411	0.9996404894486884	10	0.07953168044077134	98.00079968012795	2.0530395756833943	0.03988038177365462	1.0168763974168964	25.0	0.5946872160441887	0.6587758831295603	0.48797559523242945
1305	1306PHE	1305	0.015333333333333334	0.013840359661351128	2.918832467013195	0.0	1.0410958904109588	0.0	47.346424037788275	0.021120919273689538	0.9994200082100251	48.66711481691695	0.9987529513242928	10	0.07953168044077134	98.00079968012795	2.0530395756833943	0.03988038177365462	1.0168763974168964	25.0	0.5946872160441887	0.6587758831295603	0.48797559523242945
1300	1301SER	1300	0.024029411764705882	0.019880503742756215	19.792083166733306	0.0	1.0141414141414142	0.0	47.854708351024655	0.020896585403149537	0.9999323179931026	44.88944236702909	0.999874384795161	10	0.07953168044077134	98.00079968012795	2.0530395756833943	0.03988038177365462	1.0168763974168964	25.0	0.5946872160441887	0.6587758831295603	0.48797559523242945
1395	1396VAL	1395	0.014923076923076923	0.012904748908006627	3.2387045181927228	0.0	1.0	0.0	48.160486350374015	0.02076390991413304	0.9997428232101209	48.718749259148765	0.9993747567257222	10	0.07953168044077134	98.00079968012795	2.0530395756833943	0.03988038177365462	1.0168763974168964	25.0	0.5946872160441887	0.6587758831295603	0.48797559523242945
1291	1292SER	1291	0.015	0.013228756555322954	0.3598560575769692	0.0	1.0	0.0	49.78495644877305	0.020086388968301387	0.994486598727976	21.01851798760372	0.6929875087790901	10	0.07953168044077134	98.00079968012795	2.0530395756833943	0.03988038177365462	1.0168763974168964	25.0	0.5946872160441887	0.6587758831295603	0.48797559523242945
1398	1399LEU	1398	0.015187969924812026	0.010255006999534372	18.192722910835666	0.0	1.0285714285714285	0.0	74.95360513874573	0.013341586414007863	0.9999929915330499	77.68101122954457	0.9999520688981951	10	0.07953168044077134	98.00079968012795	2.0530395756833943	0.03988038177365462	1.0168763974168964	25.0	0.5946872160441887	0.6587758831295603	0.48797559523242945
1301	1302ILE	1301	0.015609756097560972	0.009690020133333782	9.276289484206318	0.0	1.0086206896551724	0.0	95.53296268837126	0.010467591204744714	0.9999810046095962	80.32894692894673	0.9999126786379577	10	0.07953168044077134	98.00079968012795	2.0530395756833943	0.03988038177365462	1.0168763974168964	25.0	0.5946872160441887	0.6587758831295603	0.48797559523242945
1204	1205TYR	1204	0.011666666666666667	0.00372677996249965	0.23990403838464613	0.0	1.0	0.0	135.51998515803186	0.0073789854598484885	0.9999062398732903	87.84823263206243	0.7979663362306719	10	0.07953168044077134	98.00079968012795	2.0530395756833943	0.03988038177365462	1.0168763974168964	25.0	0.5946872160441887	0.6587758831295603	0.48797559523242945
1399	1400GLY	1399	0.0115	0.003570714214271425	1.599360255897641	0.0	1.0	0.0	143.06370661506656	0.006989892990055427	0.9999425478457971	150.02867381408143	0.9998067811771756	10	0.07953168044077134	98.00079968012795	2.0530395756833943	0.03988038177365462	1.0168763974168964	25.0	0.5946872160441887	0.6587758831295603	0.48797559523242945
1303	1304LEU	1303	0.010555555555555556	0.002290614236454256	0.7197121151539384	0.0	1.0	0.0	226.4558011145806	0.004415872744606912	0.999999677838968	208.37688924930595	0.9999958166170476	10	0.07953168044077134	98.00079968012795	2.0530395756833943	0.03988038177365462	1.0168763974168964	25.0	0.5946872160441887	0.6587758831295603	0.48797559523242945
1309	1310TYR	1309	0.01	0.0	0.03998400639744103	0.0	1.0	0.0	0.0	0.0	-0.00040016006402532334	0.0	-0.00040016006402532334	10	0.07953168044077134	98.00079968012795	2.0530395756833943	0.03988038177365462	1.0168763974168964	25.0	0.5946872160441887	0.6587758831295603	0.48797559523242945
51	52LYS	51	0.20081395348837208	0.2691511856476444	24.870051979208316	0.0	1.0032154340836013	0.0	0.8366490751969639	1.1952442543064785	0.9981323364144536	2.500940274627293	0.9979404966764784	2	0.0863950276243094	98.52059176329468	2.270292207792208	0.5079913676895833	0.8860681623906412	1.9685373878460606	0.997250613998469	0.9879831621725277	0.6333239327065842
384	385TYR	384	0.20059405940594058	0.38898400736342786	42.50299880047981	0.0	1.008466603951082	0.0	1.1317552396123267	0.8835832740147433	0.9984949182263072	1.4982951120646966	0.9922062940332234	2	0.0863950276243094	98.52059176329468	2.270292207792208	0.5079913676895833	0.8860681623906412	1.9685373878460606	0.997250613998469	0.9879831621725277	0.6333239327065842
52	53ILE	52	0.2509090909090909	0.5170713779715093	51.57936825269892	0.0	1.0286821705426357	0.0	1.3334567533742583	0.7499305826525986	0.9852558525702105	1.194689578740667	0.992842264996353	2	0.0863950276243094	98.52059176329468	2.270292207792208	0.5079913676895833	0.8860681623906412	1.9685373878460606	0.997250613998469	0.9879831621725277	0.6333239327065842
50	51HIS	50	0.14910714285714285	0.28972242536349063	58.89644142343063	0.0	1.1364562118126273	0.0	2.1984338119529854	0.45486927764800295	0.9982771703968732	1.792333939457792	0.9967161842339978	2	0.0863950276243094	98.52059176329468	2.270292207792208	0.5079913676895833	0.8860681623906412	1.9685373878460606	0.997250613998469	0.9879831621725277	0.6333239327065842
392	393ASN	392	0.13212962962962965	0.19333836643796248	22.151139544182328	0.0	1.0036101083032491	0.0	3.5006680591315846	0.2856597606823857	0.9990876574550381	3.6549177048776507	0.9988215775500333	2	0.0863950276243094	98.52059176329468	2.270292207792208	0.5079913676895833	0.8860681623906412	1.9685373878460606	0.997250613998469	0.9879831621725277	0.6333239327065842
1046	1047ASN	1046	0.11560509554140129	0.15826422146427002	28.388644542183126	0.0	1.0309859154929577	0.0	4.322846472385885	0.2313290574596963	0.9998922325238397	3.891027224758704	0.9994093141872362	2	0.0863950276243094	98.52059176329468	2.270292207792208	0.5079913676895833	0.8860681623906412	1.9685373878460606	0.997250613998469	0.9879831621725277	0.6333239327065842
393	394LYS	393	0.12572289156626507	0.19110432483319706	41.143542582966816	0.0	1.0894071914480077	0.0	4.370945764685249	0.22878343814728386	0.9980695955274631	3.261259296110768	0.9988695075901548	2	0.0863950276243094	98.52059176329468	2.270292207792208	0.5079913676895833	0.8860681623906412	1.9685373878460606	0.997250613998469	0.9879831621725277	0.6333239327065842
55	56VAL	55	0.10583783783783784	0.1756823782505163	48.02079168332667	0.0	1.0424646128226478	0.0	4.482565806252808	0.22308651857493825	0.9997082713774064	3.770759761163167	0.9986020434472586	2	0.0863950276243094	98.52059176329468	2.270292207792208	0.5079913676895833	0.8860681623906412	1.9685373878460606	0.997250613998469	0.9879831621725277	0.6333239327065842
59	60ILE	59	0.05996774193548386	0.07438998539561094	39.78408636545382	0.0	1.0472361809045225	0.0	4.962031679907926	0.20153035379624093	0.9993164707885995	7.865160901126574	0.9989573725297325	2	0.0863950276243094	98.52059176329468	2.270292207792208	0.5079913676895833	0.8860681623906412	1.9685373878460606	0.997250613998469	0.9879831621725277	0.6333239327065842
389	390ILE	389	0.11324324324324325	0.15119441670754719	43.10275889644142	0.0	1.0055658627087198	0.0	5.2377711363499495	0.19092090394328892	0.9994821465120614	3.5686549524879054	0.9975441286542539	2	0.0863950276243094	98.52059176329468	2.270292207792208	0.5079913676895833	0.8860681623906412	1.9685373878460606	0.997250613998469	0.9879831621725277	0.6333239327065842
56	57TYR	56	0.04232432432432433	0.0669772264862222	16.953218712514992	0.0	1.0117924528301887	0.0	5.7682256880275276	0.1733635357013839	0.998968483769082	10.775734378304321	0.9984898710952258	2	0.0863950276243094	98.52059176329468	2.270292207792208	0.5079913676895833	0.8860681623906412	1.9685373878460606	0.997250613998469	0.9879831621725277	0.6333239327065842
396	397ILE	396	0.07157480314960629	0.10427420844207398	36.14554178328669	0.0	1.0663716814159292	0.0	6.212110115457888	0.16097589730607845	0.99978822199462	6.119616032540413	0.9995879599956032	2	0.0863950276243094	98.52059176329468	2.270292207792208	0.5079913676895833	0.8860681623906412	1.9685373878460606	0.997250613998469	0.9879831621725277	0.6333239327065842
399	400TRP	399	0.06715753424657535	0.09742824464288594	50.25989604158337	0.0	1.0644391408114557	0.0	7.436839447201443	0.13446572392742862	0.999827447951285	7.855717078161798	0.9996723787153942	2	0.0863950276243094	98.52059176329468	2.270292207792208	0.5079913676895833	0.8860681623906412	1.9685373878460606	0.997250613998469	0.9879831621725277	0.6333239327065842
49	50PHE	49	0.04094758064516129	0.05602157269347182	44.342263094762096	0.0	1.1659152389540126	0.0	9.076364910021427	0.11017626659059031	0.9993374020009852	9.515111011827129	0.9993199009939303	2	0.0863950276243094	98.52059176329468	2.270292207792208	0.5079913676895833	0.8860681623906412	1.9685373878460606	0.997250613998469	0.9879831621725277	0.6333239327065842
395	396THR	395	0.0425	0.05068283733178323	0.23990403838464613	0.0	1.0	0.0	11.123680328383475	0.08989830438118342	0.9865052293152579	49.51987182052791	0.989770725218348	2	0.0863950276243094	98.52059176329468	2.270292207792208	0.5079913676895833	0.8860681623906412	1.9685373878460606	0.997250613998469	0.9879831621725277	0.6333239327065842
60	61ILE	60	0.03144444444444445	0.04390801271120015	6.557377049180328	0.0	1.0	0.0	11.187299937853266	0.08938707333808109	0.9994812547569696	13.50432399479324	0.9986119114582784	2	0.0863950276243094	98.52059176329468	2.270292207792208	0.5079913676895833	0.8860681623906412	1.9685373878460606	0.997250613998469	0.9879831621725277	0.6333239327065842
46	47TYR	46	0.04789041095890411	0.06109672583739893	43.50259896041583	0.0	1.1295955882352942	0.0	11.510396983048928	0.08687797662171642	0.9999574825686375	13.692642411384465	0.9976362246261298	2	0.0863950276243094	98.52059176329468	2.270292207792208	0.5079913676895833	0.8860681623906412	1.9685373878460606	0.997250613998469	0.9879831621725277	0.6333239327065842
63	64LEU	63	0.02695431472081218	0.037306018678043555	12.195121951219512	0.0	1.0098360655737706	0.0	11.530945641730433	0.08672315619813566	0.9997097827446623	14.26047569427674	0.9930364451807081	2	0.0863950276243094	98.52059176329468	2.270292207792208	0.5079913676895833	0.8860681623906412	1.9685373878460606	0.997250613998469	0.9879831621725277	0.6333239327065842
447	448PHE	447	0.031376404494382025	0.0409996424277965	26.90923630547781	0.0	1.0326894502228827	0.0	11.901105553648726	0.08402580713969156	0.9998134730108326	13.305619884966793	0.9996609147819637	2	0.0863950276243094	98.52059176329468	2.270292207792208	0.5079913676895833	0.8860681623906412	1.9685373878460606	0.997250613998469	0.9879831621725277	0.6333239327065842
383	384LYS	383	0.034999999999999996	0.03853569773599538	0.6397441023590564	0.0	1.0	0.0	15.771653803625489	0.06340489161448157	0.9921390943041717	34.96753906521015	0.9912514914146033	2	0.0863950276243094	98.52059176329468	2.270292207792208	0.5079913676895833	0.8860681623906412	1.9685373878460606	0.997250613998469	0.9879831621725277	0.6333239327065842
450	451ILE	450	0.027777777777777773	0.03516355883310452	12.87485005997601	0.0	1.0031055900621118	0.0	16.262484465148244	0.061491219385517444	0.9995465240081909	23.180373791511506	0.9974190891498997	2	0.0863950276243094	98.52059176329468	2.270292207792208	0.5079913676895833	0.8860681623906412	1.9685373878460606	0.997250613998469	0.9879831621725277	0.6333239327065842
386	387LYS	386	0.0353968253968254	0.04308814873431517	4.118352658936425	0.0	1.0	0.0	17.39024024200969	0.05750351841513351	0.9986096709588488	14.229109511595643	0.9953233726695672	2	0.0863950276243094	98.52059176329468	2.270292207792208	0.5079913676895833	0.8860681623906412	1.9685373878460606	0.997250613998469	0.9879831621725277	0.6333239327065842
451	452VAL	451	0.0380952380952381	0.0427193552228682	1.2395041983206718	0.0	1.0	0.0	19.1937337444136	0.05210033718900854	0.9990580243557537	17.198384684471684	0.9980215947360916	2	0.0863950276243094	98.52059176329468	2.270292207792208	0.5079913676895833	0.8860681623906412	1.9685373878460606	0.997250613998469	0.9879831621725277	0.6333239327065842
43	44LEU	43	0.023727272727272725	0.024040083607065738	14.754098360655737	0.0	1.024390243902439	0.0	20.690867628977333	0.048330501066060225	0.9999518705327997	22.74247750249982	0.9997737407458571	2	0.0863950276243094	98.52059176329468	2.270292207792208	0.5079913676895833	0.8860681623906412	1.9685373878460606	0.997250613998469	0.9879831621725277	0.6333239327065842
502	503LYS	502	0.017333333333333333	0.011234866364235145	0.5997600959616154	0.0	1.0	0.0	21.074279348389652	0.04745120739212432	0.9997239922171024	43.17981670096641	0.9981586878594936	2	0.0863950276243094	98.52059176329468	2.270292207792208	0.5079913676895833	0.8860681623906412	1.9685373878460606	0.997250613998469	0.9879831621725277	0.6333239327065842
42	43PHE	42	0.035393700787401575	0.03924537336296676	46.26149540183926	0.0	1.2005185825410545	0.0	21.8732608270049	0.04571792051989762	0.9999139663579092	21.031953658499653	0.9996166101749729	2	0.0863950276243094	98.52059176329468	2.270292207792208	0.5079913676895833	0.8860681623906412	1.9685373878460606	0.997250613998469	0.9879831621725277	0.6333239327065842
382	383LEU	382	0.036557971014492756	0.036387113126494654	22.391043582566972	0.0	1.075	0.0	25.80308680561804	0.03875505312729764	0.9999573745909947	19.18662083656736	0.9996034217185004	2	0.0863950276243094	98.52059176329468	2.270292207792208	0.5079913676895833	0.8860681623906412	1.9685373878460606	0.997250613998469	0.9879831621725277	0.6333239327065842
58	59PHE	58	0.01962555066079295	0.016528998920488584	24.55017992802879	0.0	1.0488599348534202	0.0	26.82860761827967	0.037273645141339726	0.9999372803111959	42.99981123487718	0.9994128868815627	2	0.0863950276243094	98.52059176329468	2.270292207792208	0.5079913676895833	0.8860681623906412	1.9685373878460606	0.997250613998469	0.9879831621725277	0.6333239327065842
403	404VAL	403	0.02799043062200957	0.03198803460964381	27.309076369452217	0.0	1.061493411420205	0.0	32.233215307811044	0.03102389849881563	0.9934041929476785	25.05521654016617	0.9997186401764011	2	0.0863950276243094	98.52059176329468	2.270292207792208	0.5079913676895833	0.8860681623906412	1.9685373878460606	0.997250613998469	0.9879831621725277	0.6333239327065842
379	380LYS	379	0.028450000000000003	0.030872277207876973	13.354658136745302	0.0	1.062874251497006	0.0	32.293892903855735	0.030965607118880512	0.9941532585137949	24.277322932658592	0.999109704067766	2	0.0863950276243094	98.52059176329468	2.270292207792208	0.5079913676895833	0.8860681623906412	1.9685373878460606	0.997250613998469	0.9879831621725277	0.6333239327065842
446	447PHE	446	0.022344497607655504	0.02017284120681213	23.15073970411835	0.0	1.0414507772020725	0.0	42.08792748189353	0.023759782432390044	0.9999532665965034	41.21547436660097	0.9998869570848685	2	0.0863950276243094	98.52059176329468	2.270292207792208	0.5079913676895833	0.8860681623906412	1.9685373878460606	0.997250613998469	0.9879831621725277	0.6333239327065842
66	67VAL	66	0.013265306122448983	0.00977037486007006	2.0791683326669332	0.0	1.0	0.0	47.18311588250681	0.021194022083877488	0.9996812969748297	56.616174015323246	0.9991919911211953	2	0.0863950276243094	98.52059176329468	2.270292207792208	0.5079913676895833	0.8860681623906412	1.9685373878460606	0.997250613998469	0.9879831621725277	0.6333239327065842
62	63VAL	62	0.017392996108949416	0.012247974086903023	12.834866053578569	0.0	1.0093457943925233	0.0	48.46451254110053	0.020633654349704763	0.9999731221145898	65.73553018325283	0.9998172180686083	2	0.0863950276243094	98.52059176329468	2.270292207792208	0.5079913676895833	0.8860681623906412	1.9685373878460606	0.997250613998469	0.9879831621725277	0.6333239327065842
381	382VAL	381	0.022277227722772276	0.017904100316856558	5.317872850859656	0.0	1.0225563909774436	0.0	51.78383485242638	0.019311045673805365	0.9997469142047211	42.9589997800095	0.9996127678857665	2	0.0863950276243094	98.52059176329468	2.270292207792208	0.5079913676895833	0.8860681623906412	1.9685373878460606	0.997250613998469	0.9879831621725277	0.6333239327065842
406	407CYS	406	0.018000000000000002	0.009797958971132711	0.47980807676929227	0.0	1.0	0.0	59.62151409474534	0.01677246905220969	0.9995379317769979	92.25845734896411	0.9984144000799784	2	0.0863950276243094	98.52059176329468	2.270292207792208	0.5079913676895833	0.8860681623906412	1.9685373878460606	0.997250613998469	0.9879831621725277	0.6333239327065842
34	35LYS	34	0.017142857142857144	0.009331389496316869	0.9996001599360256	0.0	1.0	0.0	62.38579165944964	0.016029290859347924	0.9993072293929837	61.0717852263853	0.998220100513738	2	0.0863950276243094	98.52059176329468	2.270292207792208	0.5079913676895833	0.8860681623906412	1.9685373878460606	0.997250613998469	0.9879831621725277	0.6333239327065842
380	381PRO	380	0.01945454545454546	0.013806214913868823	2.9588164734106357	0.0	1.0	0.0	65.81812910375147	0.015193382334275472	0.9998205765629335	51.78347872905415	0.9995346117136241	2	0.0863950276243094	98.52059176329468	2.270292207792208	0.5079913676895833	0.8860681623906412	1.9685373878460606	0.997250613998469	0.9879831621725277	0.6333239327065842
47	48GLU	47	0.015384615384615385	0.011512791959304436	0.5997600959616154	0.0	1.0	0.0	65.9711290130152	0.01515814591868988	0.9989773807184069	74.47517780654178	0.8979906871420672	2	0.0863950276243094	98.52059176329468	2.270292207792208	0.5079913676895833	0.8860681623906412	1.9685373878460606	0.997250613998469	0.9879831621725277	0.6333239327065842
31	32ILE	31	0.016	0.008	0.19992003198720512	0.0	1.0	0.0	165.5739050058132	0.006039599053757237	0.9990472434590882	110.88586370743778	0.9974160511652659	2	0.0863950276243094	98.52059176329468	2.270292207792208	0.5079913676895833	0.8860681623906412	1.9685373878460606	0.997250613998469	0.9879831621725277	0.6333239327065842
32	33THR	32	0.01	0.0	0.03998400639744103	0.0	1.0	0.0	0.0	0.0	-0.00040016006402532334	0.0	-0.00040016006402532334	2	0.0863950276243094	98.52059176329468	2.270292207792208	0.5079913676895833	0.8860681623906412	1.9685373878460606	0.997250613998469	0.9879831621725277	0.6333239327065842
402	403GLN	402	0.01	0.0	0.3198720511795282	0.0	1.0	0.0	0.0	0.0	-0.00040016006402532334	0.0	-0.00040016006402532334	2	0.0863950276243094	98.52059176329468	2.270292207792208	0.5079913676895833	0.8860681623906412	1.9685373878460606	0.997250613998469	0.9879831621725277	0.6333239327065842
153	154SER	153	0.02444444444444445	0.043233503240763825	1.0795681727309077	0.0	1.0	0.0	1.2973113202723086	0.7708250011956249	0.956835774640523	45.46810560355647	0.9860687874416193	5	0.07358381502890173	95.04198320671732	2.436684896928902	0.8993081332644492	1.543791202364332	1.1119659247048548	0.9958138839675216	0.985452941080452	0.7211083841562599
76	77PRO	76	0.06788732394366198	0.17296841275547561	10.995601759296282	0.0	1.0	0.0	1.7729277460781898	0.5640387783495706	0.990015112769897	4.412603619811774	0.9811075061926934	5	0.07358381502890173	95.04198320671732	2.436684896928902	0.8993081332644492	1.543791202364332	1.1119659247048548	0.9958138839675216	0.985452941080452	0.7211083841562599
135	136ARG	135	0.08271028037383177	0.20043676651490222	22.27109156337465	0.0	1.0718132854578097	0.0	1.9594463569826752	0.510348240173253	0.995416769834619	2.3433033785421387	0.9948510907648835	5	0.07358381502890173	95.04198320671732	2.436684896928902	0.8993081332644492	1.543791202364332	1.1119659247048548	0.9958138839675216	0.985452941080452	0.7211083841562599
1243	1244PHE	1243	0.08307086614173227	0.21484479587965968	25.869652139144343	0.0	1.0247295208655331	0.0	2.0191359603682004	0.49526134922466764	0.9979214474438042	2.183728013232824	0.9941373073902279	5	0.07358381502890173	95.04198320671732	2.436684896928902	0.8993081332644492	1.543791202364332	1.1119659247048548	0.9958138839675216	0.985452941080452	0.7211083841562599
140	141LEU	140	0.04437810945273632	0.15421035035826833	20.431827269092363	0.0	1.0626223091976517	0.0	2.140947944188224	0.4670828184844852	0.9627911555938453	3.126158296647301	0.9813326940228662	5	0.07358381502890173	95.04198320671732	2.436684896928902	0.8993081332644492	1.543791202364332	1.1119659247048548	0.9958138839675216	0.985452941080452	0.7211083841562599
146	147LYS	146	0.16133333333333336	0.28648366251653673	30.947620951619353	0.0	1.0077519379844961	0.0	2.5506912739797514	0.39205058260137304	0.9917834543337134	3.4164827744810227	0.9971438298360242	5	0.07358381502890173	95.04198320671732	2.436684896928902	0.8993081332644492	1.543791202364332	1.1119659247048548	0.9958138839675216	0.985452941080452	0.7211083841562599
139	140LYS	139	0.09222222222222222	0.18688396743420937	17.59296281487405	0.0	1.0204545454545455	0.0	2.6397651969532423	0.3788215713860375	0.9982344295565949	3.3420390282110715	0.9933455252142845	5	0.07358381502890173	95.04198320671732	2.436684896928902	0.8993081332644492	1.543791202364332	1.1119659247048548	0.9958138839675216	0.985452941080452	0.7211083841562599
147	148LYS	147	0.10266129032258063	0.20798615366043988	51.339464214314276	0.0	1.2834890965732086	0.0	2.723412322598786	0.3671864123188519	0.9991320640826499	2.8120363650678075	0.9968027275016826	5	0.07358381502890173	95.04198320671732	2.436684896928902	0.8993081332644492	1.543791202364332	1.1119659247048548	0.9958138839675216	0.985452941080452	0.7211083841562599
157	158ASP	157	0.040188679245283014	0.095189131151884	13.034786085565774	0.0	1.049079754601227	0.0	2.737651112878135	0.36527663999839793	0.9937879698142963	8.219435625055382	0.9805936321531663	5	0.07358381502890173	95.04198320671732	2.436684896928902	0.8993081332644492	1.543791202364332	1.1119659247048548	0.9958138839675216	0.985452941080452	0.7211083841562599
150	151SER	150	0.08691729323308271	0.16032007670337856	23.83046781287485	0.0	1.016778523489933	0.0	2.8483290421192495	0.3510830333197626	0.9979465732448695	2.7827336092456694	0.9961204475927943	5	0.07358381502890173	95.04198320671732	2.436684896928902	0.8993081332644492	1.543791202364332	1.1119659247048548	0.9958138839675216	0.985452941080452	0.7211083841562599
1237	1238HIS	1237	0.09	0.09046886417224095	2.2391043582566974	0.0	1.0	0.0	2.894717864131189	0.34545681027886177	0.9979050148381875	8.61539538314331	0.995971894320762	5	0.07358381502890173	95.04198320671732	2.436684896928902	0.8993081332644492	1.543791202364332	1.1119659247048548	0.9958138839675216	0.985452941080452	0.7211083841562599
144	145LYS	144	0.09136	0.1848798269146745	41.82327069172331	0.0	1.2676864244741874	0.0	2.8966025503788284	0.34523203739816366	0.9981685547047102	2.947804715939392	0.9930493090646607	5	0.07358381502890173	95.04198320671732	2.436684896928902	0.8993081332644492	1.543791202364332	1.1119659247048548	0.9958138839675216	0.985452941080452	0.7211083841562599
143	144GLN	143	0.08736434108527132	0.1552518303320932	20.23190723710516	0.0	1.017786561264822	0.0	3.0727564572861934	0.3254406959682002	0.9983832352260396	3.143596889516412	0.9951472204183525	5	0.07358381502890173	95.04198320671732	2.436684896928902	0.8993081332644492	1.543791202364332	1.1119659247048548	0.9958138839675216	0.985452941080452	0.7211083841562599
1358	1359SER	1358	0.08173228346456693	0.1887759764184483	22.031187524990003	0.0	1.014519056261343	0.0	3.0836496594045766	0.32429105457884294	0.9734108667409698	4.273975784440517	0.9920243717999935	5	0.07358381502890173	95.04198320671732	2.436684896928902	0.8993081332644492	1.543791202364332	1.1119659247048548	0.9958138839675216	0.985452941080452	0.7211083841562599
1365	1366THR	1365	0.05641891891891892	0.0965276191755299	18.0327868852459	0.0	1.033259423503326	0.0	3.5053354935635648	0.2852793981734936	0.9987278615423568	6.534119804105311	0.9950167068303118	5	0.07358381502890173	95.04198320671732	2.436684896928902	0.8993081332644492	1.543791202364332	1.1119659247048548	0.9958138839675216	0.985452941080452	0.7211083841562599
1361	1362SER	1361	0.04680851063829787	0.10730561610054701	27.548980407836865	0.0	1.0566037735849056	0.0	4.032460968748613	0.24798752120602133	0.9989210215115978	4.148998882039534	0.9953909367421204	5	0.07358381502890173	95.04198320671732	2.436684896928902	0.8993081332644492	1.543791202364332	1.1119659247048548	0.9958138839675216	0.985452941080452	0.7211083841562599
141	142PHE	141	0.07557894736842105	0.13030099397345718	47.98080767692923	0.0	1.2	0.0	4.0397591125532815	0.2475395121685763	0.9992014906202218	5.096574751575763	0.9975907819255555	5	0.07358381502890173	95.04198320671732	2.436684896928902	0.8993081332644492	1.543791202364332	1.1119659247048548	0.9958138839675216	0.985452941080452	0.7211083841562599
1249	1250ILE	1249	0.07636363636363637	0.08456011603078897	1.3594562175129947	0.0	1.0	0.0	4.169919245074166	0.23981279761743063	0.9962892678321654	7.757001979518835	0.9928483357625991	5	0.07358381502890173	95.04198320671732	2.436684896928902	0.8993081332644492	1.543791202364332	1.1119659247048548	0.9958138839675216	0.985452941080452	0.7211083841562599
138	139LYS	138	0.12423728813559323	0.19505934246831455	15.63374650139944	0.0	1.0076726342710998	0.0	4.171458223187527	0.23972432336524094	0.9996743862985811	3.4117632711873482	0.9973214962523382	5	0.07358381502890173	95.04198320671732	2.436684896928902	0.8993081332644492	1.543791202364332	1.1119659247048548	0.9958138839675216	0.985452941080452	0.7211083841562599
1238	1239SER	1238	0.08418181818181818	0.14017769124923887	8.756497401039583	0.0	1.0273972602739727	0.0	4.196523981712919	0.2382924545070333	0.99825273491102	4.102100256259286	0.9961844997855644	5	0.07358381502890173	95.04198320671732	2.436684896928902	0.8993081332644492	1.543791202364332	1.1119659247048548	0.9958138839675216	0.985452941080452	0.7211083841562599
1246	1247LEU	1246	0.08359649122807018	0.1119455318132514	21.79128348660536	0.0	1.0055045871559634	0.0	5.40301934240751	0.18508169906984157	0.9973260497654611	4.8117554097239	0.9971442603337664	5	0.07358381502890173	95.04198320671732	2.436684896928902	0.8993081332644492	1.543791202364332	1.1119659247048548	0.9958138839675216	0.985452941080452	0.7211083841562599
1353	1354ILE	1353	0.07695652173913044	0.1296256708170168	34.66613354658137	0.0	1.0922722029988465	0.0	5.432413371295509	0.18408024788465652	0.9989602008803147	3.6012114001969464	0.9980290712014763	5	0.07358381502890173	95.04198320671732	2.436684896928902	0.8993081332644492	1.543791202364332	1.1119659247048548	0.9958138839675216	0.985452941080452	0.7211083841562599
1366	1367ALA	1366	0.024444444444444446	0.034029761846919006	0.4398240703718513	0.0	1.0	0.0	5.535499178723611	0.18065218107946365	0.9744003637739942	67.1212418014001	0.8910080325998246	5	0.07358381502890173	95.04198320671732	2.436684896928902	0.8993081332644492	1.543791202364332	1.1119659247048548	0.9958138839675216	0.985452941080452	0.7211083841562599
152	153GLU	152	0.03142857142857143	0.0670668262531743	2.1591363454618153	0.0	1.0	0.0	5.99316090656559	0.16685685827398464	0.9884505119091055	6.182131779495647	0.9805172531385272	5	0.07358381502890173	95.04198320671732	2.436684896928902	0.8993081332644492	1.543791202364332	1.1119659247048548	0.9958138839675216	0.985452941080452	0.7211083841562599
1242	1243LEU	1242	0.05903225806451613	0.09848382342063242	13.954418232706917	0.0	1.0315186246418337	0.0	6.0310407560147175	0.16580886126539712	0.9977361378089702	5.9534443652998075	0.9950218646232919	5	0.07358381502890173	95.04198320671732	2.436684896928902	0.8993081332644492	1.543791202364332	1.1119659247048548	0.9958138839675216	0.985452941080452	0.7211083841562599
1377	1378LYS	1377	0.053541666666666675	0.06091283332672096	6.557377049180328	0.0	1.0	0.0	6.267935882742101	0.15954215529762555	0.998285010819914	7.870578992797817	0.9959627689548878	5	0.07358381502890173	95.04198320671732	2.436684896928902	0.8993081332644492	1.543791202364332	1.1119659247048548	0.9958138839675216	0.985452941080452	0.7211083841562599
1354	1355GLY	1354	0.09616438356164383	0.10657340562384145	9.196321471411435	0.0	1.0	0.0	6.372113483430038	0.1569338026700854	0.9993739511768844	6.059414138804266	0.9989382577354252	5	0.07358381502890173	95.04198320671732	2.436684896928902	0.8993081332644492	1.543791202364332	1.1119659247048548	0.9958138839675216	0.985452941080452	0.7211083841562599
142	143PRO	142	0.07095238095238096	0.09829037456651747	5.557776889244303	0.0	1.0071942446043165	0.0	6.914179460925285	0.14463032173975068	0.9973747129410115	6.868465483818722	0.9958568137357805	5	0.07358381502890173	95.04198320671732	2.436684896928902	0.8993081332644492	1.543791202364332	1.1119659247048548	0.9958138839675216	0.985452941080452	0.7211083841562599
75	76ILE	75	0.037532467532467535	0.03618695481946621	7.397041183526589	0.0	1.0	0.0	7.3681399207217595	0.13571946390264034	0.9990840357067364	15.701144133179403	0.9986438291318975	5	0.07358381502890173	95.04198320671732	2.436684896928902	0.8993081332644492	1.543791202364332	1.1119659247048548	0.9958138839675216	0.985452941080452	0.7211083841562599
1250	1251ILE	1250	0.0496551724137931	0.08327282781650014	3.598560575769692	0.0	1.0	0.0	7.4294699247763525	0.1345991046635945	0.9974004077962567	8.392310020971765	0.993127837592715	5	0.07358381502890173	95.04198320671732	2.436684896928902	0.8993081332644492	1.543791202364332	1.1119659247048548	0.9958138839675216	0.985452941080452	0.7211083841562599
1234	1235ILE	1234	0.05736842105263158	0.06522636200966368	16.35345861655338	0.0	1.0244498777506112	0.0	7.692228630464681	0.13000133615888	0.9997077237123722	12.894398002966796	0.9994239556687068	5	0.07358381502890173	95.04198320671732	2.436684896928902	0.8993081332644492	1.543791202364332	1.1119659247048548	0.9958138839675216	0.985452941080452	0.7211083841562599
151	152ILE	151	0.035199999999999995	0.050015311941158866	14.074370251899241	0.0	1.0142045454545454	0.0	8.946526939464777	0.11177521811160217	0.9990933223742907	16.13859819750352	0.9976104225294229	5	0.07358381502890173	95.04198320671732	2.436684896928902	0.8993081332644492	1.543791202364332	1.1119659247048548	0.9958138839675216	0.985452941080452	0.7211083841562599
1368	1369ALA	1368	0.026544117647058826	0.03636778382981346	8.476609356257496	0.0	1.0047169811320755	0.0	9.00800251593067	0.11101240238682195	0.9985535958115974	28.912693557148714	0.9987973416393819	5	0.07358381502890173	95.04198320671732	2.436684896928902	0.8993081332644492	1.543791202364332	1.1119659247048548	0.9958138839675216	0.985452941080452	0.7211083841562599
81	82PRO	81	0.077	0.06116371473349211	1.4394242303078768	0.0	1.0	0.0	9.891298701449085	0.10109895881048452	0.995093424460696	10.326562828132278	0.9915049364106772	5	0.07358381502890173	95.04198320671732	2.436684896928902	0.8993081332644492	1.543791202364332	1.1119659247048548	0.9958138839675216	0.985452941080452	0.7211083841562599
1350	1351SER	1350	0.060441176470588234	0.07807928016300343	25.8296681327469	0.0	1.0557275541795665	0.0	10.253069173132086	0.09753177152266515	0.9998275004008808	10.977668080559067	0.9991518907383566	5	0.07358381502890173	95.04198320671732	2.436684896928902	0.8993081332644492	1.543791202364332	1.1119659247048548	0.9958138839675216	0.985452941080452	0.7211083841562599
1372	1373THR	1372	0.03331081081081081	0.04948912675437054	12.634946021591363	0.0	1.0126582278481013	0.0	11.42132145316565	0.0875555428590822	0.9995286265726773	13.22567299120315	0.9990412735349175	5	0.07358381502890173	95.04198320671732	2.436684896928902	0.8993081332644492	1.543791202364332	1.1119659247048548	0.9958138839675216	0.985452941080452	0.7211083841562599
1369	1370PHE	1369	0.05000000000000001	0.06474980550884177	15.713714514194322	0.0	1.0712468193384224	0.0	11.591263227912554	0.08627187393966963	0.9994960494157665	10.831088224969866	0.9989578879511306	5	0.07358381502890173	95.04198320671732	2.436684896928902	0.8993081332644492	1.543791202364332	1.1119659247048548	0.9958138839675216	0.985452941080452	0.7211083841562599
1362	1363PHE	1362	0.04007142857142857	0.05836457375315744	14.0343862455018	0.0	1.0113960113960114	0.0	11.769913321759638	0.08496239289640724	0.9989943210362122	12.049811934778099	0.9986112005064121	5	0.07358381502890173	95.04198320671732	2.436684896928902	0.8993081332644492	1.543791202364332	1.1119659247048548	0.9958138839675216	0.985452941080452	0.7211083841562599
1357	1358PHE	1357	0.03046925566343042	0.03753237902795056	45.021991203518596	0.0	1.1944937833037301	0.0	12.153743492885386	0.08227917600740747	0.9998614240516608	12.344802820077312	0.999728981993983	5	0.07358381502890173	95.04198320671732	2.436684896928902	0.8993081332644492	1.543791202364332	1.1119659247048548	0.9958138839675216	0.985452941080452	0.7211083841562599
73	74ASN	73	0.040545454545454544	0.05388263953236893	4.478208716513395	0.0	1.0	0.0	12.727827900785341	0.07856800137424055	0.9978360541771678	10.647258902043545	0.9938712169695292	5	0.07358381502890173	95.04198320671732	2.436684896928902	0.8993081332644492	1.543791202364332	1.1119659247048548	0.9958138839675216	0.985452941080452	0.7211083841562599
1241	1242VAL	1241	0.07833333333333332	0.037155828016013255	0.5997600959616154	0.0	1.0	0.0	12.947346552421891	0.0772359028122981	0.9867090775002203	13.079864939320865	0.9853106771272022	5	0.07358381502890173	95.04198320671732	2.436684896928902	0.8993081332644492	1.543791202364332	1.1119659247048548	0.9958138839675216	0.985452941080452	0.7211083841562599
1253	1254ILE	1253	0.028666666666666667	0.047590848793532654	1.2395041983206718	0.0	1.0	0.0	12.966935300300337	0.07711922492409122	0.9916394289308785	17.13751981919005	0.9832689323272845	5	0.07358381502890173	95.04198320671732	2.436684896928902	0.8993081332644492	1.543791202364332	1.1119659247048548	0.9958138839675216	0.985452941080452	0.7211083841562599
1239	1240TYR	1239	0.025	0.023452078799117145	0.5197920831667333	0.0	1.0	0.0	13.184275950542068	0.07584792701178901	0.9962927770422275	22.25199712325597	0.9941268577685862	5	0.07358381502890173	95.04198320671732	2.436684896928902	0.8993081332644492	1.543791202364332	1.1119659247048548	0.9958138839675216	0.985452941080452	0.7211083841562599
84	85ILE	84	0.06666666666666667	0.041899350299921784	0.4398240703718513	0.0	1.0	0.0	13.214532401282714	0.07567426297300778	0.9858110762760991	24.419531054652207	0.9847073813421996	5	0.07358381502890173	95.04198320671732	2.436684896928902	0.8993081332644492	1.543791202364332	1.1119659247048548	0.9958138839675216	0.985452941080452	0.7211083841562599
1376	1377ASN	1376	0.027333333333333334	0.04154783053568769	1.2395041983206718	0.0	1.0	0.0	13.769595670752963	0.0726237737048467	0.9894145149692104	54.158311022195974	0.9927532785467836	5	0.07358381502890173	95.04198320671732	2.436684896928902	0.8993081332644492	1.543791202364332	1.1119659247048548	0.9958138839675216	0.985452941080452	0.7211083841562599
1233	1234GLU	1233	0.032608695652173905	0.027539282821066286	1.3194722111155537	0.0	1.0	0.0	16.891361482641173	0.05920185895184795	0.999397747145821	31.40046903847496	0.9987678294648095	5	0.07358381502890173	95.04198320671732	2.436684896928902	0.8993081332644492	1.543791202364332	1.1119659247048548	0.9958138839675216	0.985452941080452	0.7211083841562599
156	157ASP	156	0.037142857142857144	0.03368521749300456	0.4398240703718513	0.0	1.0	0.0	16.940977049565348	0.059028472624349425	0.9973725183292379	29.03149966528026	0.9951578431794499	5	0.07358381502890173	95.04198320671732	2.436684896928902	0.8993081332644492	1.543791202364332	1.1119659247048548	0.9958138839675216	0.985452941080452	0.7211083841562599
1375	1376GLY	1375	0.022000000000000002	0.01720465053408525	1.3594562175129947	0.0	1.0	0.0	18.282898589861407	0.05469592226226862	0.9976111866115127	34.83998089907824	0.99749185581275	5	0.07358381502890173	95.04198320671732	2.436684896928902	0.8993081332644492	1.543791202364332	1.1119659247048548	0.9958138839675216	0.985452941080452	0.7211083841562599
1235	1236LEU	1235	0.0375	0.031124748994971828	0.3598560575769692	0.0	1.0	0.0	20.083209534852113	0.0497928380553225	0.9951540674396767	51.532867463954815	0.9920088516817872	5	0.07358381502890173	95.04198320671732	2.436684896928902	0.8993081332644492	1.543791202364332	1.1119659247048548	0.9958138839675216	0.985452941080452	0.7211083841562599
1378	1379SER	1378	0.03428571428571429	0.03016958868848982	0.5197920831667333	0.0	1.0	0.0	20.409348913740544	0.048997153423485866	0.9956552247272225	31.293001778537718	0.9937171082016428	5	0.07358381502890173	95.04198320671732	2.436684896928902	0.8993081332644492	1.543791202364332	1.1119659247048548	0.9958138839675216	0.985452941080452	0.7211083841562599
148	149ILE	148	0.03391304347826087	0.03824851579215143	6.437425029988005	0.0	1.0248447204968945	0.0	20.462562121586824	0.048869735571629984	0.9998614836147276	18.85785234567657	0.9983223521740678	5	0.07358381502890173	95.04198320671732	2.436684896928902	0.8993081332644492	1.543791202364332	1.1119659247048548	0.9958138839675216	0.985452941080452	0.7211083841562599
1371	1372PHE	1371	0.022314814814814815	0.02866170762925625	7.477009196321472	0.0	1.0106951871657754	0.0	21.6064778771226	0.0462824161201591	0.9989646429670531	26.63385851539284	0.9963212823032184	5	0.07358381502890173	95.04198320671732	2.436684896928902	0.8993081332644492	1.543791202364332	1.1119659247048548	0.9958138839675216	0.985452941080452	0.7211083841562599
80	81PHE	80	0.03590909090909091	0.0380082635643034	7.0371851259496205	0.0	1.0113636363636365	0.0	22.625884546865915	0.04419716709544148	0.9997958875979475	21.768112920491525	0.999435789048194	5	0.07358381502890173	95.04198320671732	2.436684896928902	0.8993081332644492	1.543791202364332	1.1119659247048548	0.9958138839675216	0.985452941080452	0.7211083841562599
154	155TYR	154	0.030093457943925237	0.030852235324060753	29.26829268292683	0.0	1.1010928961748634	0.0	23.13856058706338	0.04321790010391111	0.999892115563799	23.158854408763332	0.9991068325200227	5	0.07358381502890173	95.04198320671732	2.436684896928902	0.8993081332644492	1.543791202364332	1.1119659247048548	0.9958138839675216	0.985452941080452	0.7211083841562599
1364	1365VAL	1364	0.024876033057851236	0.02478388247519669	15.353858456617353	0.0	1.0442708333333333	0.0	30.782673149156086	0.03248580768650416	0.999778167593047	33.32557983230364	0.999218157851938	5	0.07358381502890173	95.04198320671732	2.436684896928902	0.8993081332644492	1.543791202364332	1.1119659247048548	0.9958138839675216	0.985452941080452	0.7211083841562599
1232	1233PHE	1232	0.025333333333333333	0.02217105219775452	1.0795681727309077	0.0	1.0	0.0	30.96906534302577	0.03229028674012598	0.9976864644002096	31.89230128177894	0.9968121023266938	5	0.07358381502890173	95.04198320671732	2.436684896928902	0.8993081332644492	1.543791202364332	1.1119659247048548	0.9958138839675216	0.985452941080452	0.7211083841562599
1373	1374GLY	1373	0.02787878787878788	0.02531708918085506	2.199120351859256	0.0	1.0	0.0	31.583994674771716	0.031661606148850066	0.9994298138087666	27.57413545235022	0.9985882362288139	5	0.07358381502890173	95.04198320671732	2.436684896928902	0.8993081332644492	1.543791202364332	1.1119659247048548	0.9958138839675216	0.985452941080452	0.7211083841562599
471	472ILE	471	0.03	0.0	0.03998400639744103	0.0	1.0	0.0	39.671971864340485	0.025206712774941725	0.9763555030769963	39.671971864340485	0.9763555030769963	5	0.07358381502890173	95.04198320671732	2.436684896928902	0.8993081332644492	1.543791202364332	1.1119659247048548	0.9958138839675216	0.985452941080452	0.7211083841562599
1379	1380PHE	1379	0.03	0.0	0.19992003198720512	0.0	1.0	0.0	39.671971864340485	0.025206712774941725	0.9763555030769963	39.671971864340485	0.9763555030769963	5	0.07358381502890173	95.04198320671732	2.436684896928902	0.8993081332644492	1.543791202364332	1.1119659247048548	0.9958138839675216	0.985452941080452	0.7211083841562599
136	137TYR	136	0.02055384615384615	0.026141644212447267	17.433026789284288	0.0	1.0711009174311927	0.0	44.257486817537284	0.022595047118756508	0.9703670992613501	20.13095242104123	0.9968444266714208	5	0.07358381502890173	95.04198320671732	2.436684896928902	0.8993081332644492	1.543791202364332	1.1119659247048548	0.9958138839675216	0.985452941080452	0.7211083841562599
1374	1375ILE	1374	0.02377358490566038	0.019831974858069302	3.2387045181927228	0.0	1.0	0.0	46.98728315992845	0.021282354133912065	0.9997235889383358	36.895596872703585	0.9992000675720577	5	0.07358381502890173	95.04198320671732	2.436684896928902	0.8993081332644492	1.543791202364332	1.1119659247048548	0.9958138839675216	0.985452941080452	0.7211083841562599
145	146THR	145	0.019999999999999997	0.013093073414159544	1.1595361855257897	0.0	1.0689655172413792	0.0	47.151376330671795	0.021208288661332324	0.9983521892927908	42.1983212756574	0.9967330224301083	5	0.07358381502890173	95.04198320671732	2.436684896928902	0.8993081332644492	1.543791202364332	1.1119659247048548	0.9958138839675216	0.985452941080452	0.7211083841562599
1254	1255LEU	1254	0.018837209302325582	0.015332384886916113	7.0371851259496205	0.0	1.0284090909090908	0.0	56.15307442362139	0.017808463922312674	0.9996014514916912	48.44117061639215	0.9992534892402526	5	0.07358381502890173	95.04198320671732	2.436684896928902	0.8993081332644492	1.543791202364332	1.1119659247048548	0.9958138839675216	0.985452941080452	0.7211083841562599
1370	1371SER	1370	0.017857142857142856	0.013190132366156704	0.7996801279488205	0.0	1.0	0.0	58.05116774112421	0.017226182330378634	0.9990630790514118	60.26106463579921	0.9980102391963677	5	0.07358381502890173	95.04198320671732	2.436684896928902	0.8993081332644492	1.543791202364332	1.1119659247048548	0.9958138839675216	0.985452941080452	0.7211083841562599
467	468CYS	467	0.02	0.0	0.03998400639744103	0.0	1.0	0.0	59.89496507342637	0.016695894200356925	0.9763873287863242	59.89496507342638	0.9763873287863241	5	0.07358381502890173	95.04198320671732	2.436684896928902	0.8993081332644492	1.543791202364332	1.1119659247048548	0.9958138839675216	0.985452941080452	0.7211083841562599
158	159GLU	158	0.017425742574257427	0.01207677300568168	4.678128748500599	0.0	1.0256410256410255	0.0	76.38643885583545	0.013091328971197434	0.999956778292942	58.689334766003284	0.9999067160846199	5	0.07358381502890173	95.04198320671732	2.436684896928902	0.8993081332644492	1.543791202364332	1.1119659247048548	0.9958138839675216	0.985452941080452	0.7211083841562599
1229	1230LYS	1229	0.013333333333333334	0.004714045207910317	0.11995201919232307	0.0	1.0	0.0	94.61374302722459	0.010569289069477524	0.9984721040748877	84.43030250069253	0.9947635610741157	5	0.07358381502890173	95.04198320671732	2.436684896928902	0.8993081332644492	1.543791202364332	1.1119659247048548	0.9958138839675216	0.985452941080452	0.7211083841562599
1380	1381LEU	1380	0.013529411764705884	0.0058823529411764705	0.8396641343462615	0.0	1.0	0.0	96.75203652769942	0.01033569975257014	0.999864195995574	93.96335919165716	0.9993391393730894	5	0.07358381502890173	95.04198320671732	2.436684896928902	0.8993081332644492	1.543791202364332	1.1119659247048548	0.9958138839675216	0.985452941080452	0.7211083841562599
475	476PHE	475	0.010769230769230769	0.0026646935501059648	0.5197920831667333	0.0	1.0	0.0	197.23470528652115	0.005070101626117517	0.9999980780519783	118.56990589783956	0.6998278560725443	5	0.07358381502890173	95.04198320671732	2.436684896928902	0.8993081332644492	1.543791202364332	1.1119659247048548	0.9958138839675216	0.985452941080452	0.7211083841562599
468	469VAL	468	0.01	0.0	0.03998400639744103	0.0	1.0	0.0	0.0	0.0	-0.00040016006402532334	0.0	-0.00040016006402532334	5	0.07358381502890173	95.04198320671732	2.436684896928902	0.8993081332644492	1.543791202364332	1.1119659247048548	0.9958138839675216	0.985452941080452	0.7211083841562599
588	589GLN	588	0.01	0.0	0.03998400639744103	0.0	1.0	0.0	0.0	0.0	-0.00040016006402532334	0.0	-0.00040016006402532334	5	0.07358381502890173	95.04198320671732	2.436684896928902	0.8993081332644492	1.543791202364332	1.1119659247048548	0.9958138839675216	0.985452941080452	0.7211083841562599
1351	1352PRO	1351	0.01	0.0	0.03998400639744103	0.0	1.0	0.0	0.0	0.0	-0.00040016006402532334	0.0	-0.00040016006402532334	5	0.07358381502890173	95.04198320671732	2.436684896928902	0.8993081332644492	1.543791202364332	1.1119659247048548	0.9958138839675216	0.985452941080452	0.7211083841562599
1381	1382GLY	1381	0.01	0.0	0.07996801279488205	0.0	1.0	0.0	0.0	0.0	-0.00040016006402532334	0.0	-0.00040016006402532334	5	0.07358381502890173	95.04198320671732	2.436684896928902	0.8993081332644492	1.543791202364332	1.1119659247048548	0.9958138839675216	0.985452941080452	0.7211083841562599
98	99TRP	98	0.15406666666666666	0.4250036810298105	57.25709716113555	0.0	1.0768156424581006	0.0	1.0615223017316255	0.9420433262388682	0.9991502502567362	1.0707883075481686	0.9944937074669948	1	0.08718937446443874	99.32027189124351	3.6525764895330113	0.9429773490702261	1.1154254479241144	1.0604708596510808	0.9982147707313651	0.9836046803950135	0.574314631577961
90	91ALA	90	0.054	0.07183900128247302	9.836065573770492	0.0	1.008130081300813	0.0	1.4812621379653992	0.6750999531882715	0.9946505932266043	9.17258512746388	0.9964280613616072	1	0.08718937446443874	99.32027189124351	3.6525764895330113	0.9429773490702261	1.1154254479241144	1.0604708596510808	0.9982147707313651	0.9836046803950135	0.574314631577961
35	36TYR	35	0.1399481865284974	0.29225848699755486	53.858456617353056	0.0	1.1566443949517446	0.0	1.8947958284122302	0.5277613476898794	0.9984877441944001	2.1808207573966825	0.9963807255851158	1	0.08718937446443874	99.32027189124351	3.6525764895330113	0.9429773490702261	1.1154254479241144	1.0604708596510808	0.9982147707313651	0.9836046803950135	0.574314631577961
190	191ARG	190	0.17645161290322584	0.3459027309397717	29.068372650939626	0.0	1.0233837689133425	0.0	1.8948518384679522	0.5277457475559312	0.980589809953643	1.2624735493570425	0.9912149261788292	1	0.08718937446443874	99.32027189124351	3.6525764895330113	0.9429773490702261	1.1154254479241144	1.0604708596510808	0.9982147707313651	0.9836046803950135	0.574314631577961
101	102HIS	101	0.22346153846153846	0.47372454108733103	39.26429428228708	0.0	1.0152749490835031	0.0	1.919205230104267	0.5210490177466178	0.99719393887737	1.138170248390765	0.9935822585099485	1	0.08718937446443874	99.32027189124351	3.6525764895330113	0.9429773490702261	1.1154254479241144	1.0604708596510808	0.9982147707313651	0.9836046803950135	0.574314631577961
108	109ASN	108	0.11202380952380953	0.10543311761609553	10.355857656937225	0.0	1.0	0.0	2.1752230943483815	0.45972296018655684	0.9996920430856455	7.522273971724569	0.9992969154371716	1	0.08718937446443874	99.32027189124351	3.6525764895330113	0.9429773490702261	1.1154254479241144	1.0604708596510808	0.9982147707313651	0.9836046803950135	0.574314631577961
95	96TYR	95	0.04630769230769231	0.12419053885392559	14.954018392642944	0.0	1.0160427807486632	0.0	2.2612839714547754	0.44222663434732595	0.9953861023768569	4.597529960248599	0.9851827832807164	1	0.08718937446443874	99.32027189124351	3.6525764895330113	0.9429773490702261	1.1154254479241144	1.0604708596510808	0.9982147707313651	0.9836046803950135	0.574314631577961
91	92ILE	91	0.05500000000000001	0.13968370864756727	10.355857656937225	0.0	1.0038610038610039	0.0	2.435866694953023	0.4105314966832721	0.9953733979738366	3.704586521203917	0.9763637150238207	1	0.08718937446443874	99.32027189124351	3.6525764895330113	0.9429773490702261	1.1154254479241144	1.0604708596510808	0.9982147707313651	0.9836046803950135	0.574314631577961
109	110ASN	109	0.0365	0.07370719096533256	1.1995201919232308	0.0	1.0	0.0	2.8398666989375374	0.35212920394260905	0.9706101350902714	26.122311365496955	0.9891498812580322	1	0.08718937446443874	99.32027189124351	3.6525764895330113	0.9429773490702261	1.1154254479241144	1.0604708596510808	0.9982147707313651	0.9836046803950135	0.574314631577961
132	133LYS	132	0.0680344827586207	0.10950955957598206	51.85925629748101	0.0	1.1117964533538935	0.0	2.9985511529664817	0.33349439412120585	0.9984829633837833	5.079016720245346	0.9946172439884433	1	0.08718937446443874	99.32027189124351	3.6525764895330113	0.9429773490702261	1.1154254479241144	1.0604708596510808	0.9982147707313651	0.9836046803950135	0.574314631577961
170	171ASN	170	0.10500000000000001	0.16454482671904336	0.5597760895641744	0.0	1.0	0.0	3.3237860334101166	0.3008617251375915	0.9784356378319921	1.9855256462259725	0.5865950839071432	1	0.08718937446443874	99.32027189124351	3.6525764895330113	0.9429773490702261	1.1154254479241144	1.0604708596510808	0.9982147707313651	0.9836046803950135	0.574314631577961
127	128SER	127	0.0708358208955224	0.16279981270066285	49.340263894442224	0.0	1.1499189627228525	0.0	3.500398840760471	0.2856817309946164	0.978028814090938	3.079546445443042	0.9881922383167974	1	0.08718937446443874	99.32027189124351	3.6525764895330113	0.9429773490702261	1.1154254479241144	1.0604708596510808	0.9982147707313651	0.9836046803950135	0.574314631577961
29	30SER	29	0.10967078189300411	0.16794538675507123	51.059576169532185	0.0	1.1816758026624903	0.0	4.293981480738357	0.23288409707534377	0.9997596022395653	4.176933704667463	0.9986260831631686	1	0.08718937446443874	99.32027189124351	3.6525764895330113	0.9429773490702261	1.1154254479241144	1.0604708596510808	0.9982147707313651	0.9836046803950135	0.574314631577961
126	127SER	126	0.07152823920265781	0.1255194788389274	37.025189924030386	0.0	1.132829373650108	0.0	4.3900978664217085	0.22778535477503659	0.9995160072912579	4.57770359862901	0.9978617615716849	1	0.08718937446443874	99.32027189124351	3.6525764895330113	0.9429773490702261	1.1154254479241144	1.0604708596510808	0.9982147707313651	0.9836046803950135	0.574314631577961
105	106LYS	105	0.0617948717948718	0.11057244509699131	24.150339864054377	0.0	1.0149006622516556	0.0	4.4959347392226245	0.22242315736391366	0.9986659299407532	5.532367203247366	0.9987109258622342	1	0.08718937446443874	99.32027189124351	3.6525764895330113	0.9429773490702261	1.1154254479241144	1.0604708596510808	0.9982147707313651	0.9836046803950135	0.574314631577961
130	131PHE	130	0.08337801608579087	0.11863775151726422	59.77608956417433	0.0	1.2836120401337792	0.0	5.181554399336285	0.19299228048789605	0.9999525311293811	5.581342543513303	0.9998378730317434	1	0.08718937446443874	99.32027189124351	3.6525764895330113	0.9429773490702261	1.1154254479241144	1.0604708596510808	0.9982147707313651	0.9836046803950135	0.574314631577961
94	95ALA	94	0.058961038961038964	0.0988976174727061	8.516593362654937	0.0	1.0	0.0	5.458724582474716	0.18319297573841864	0.9991906337000644	5.313151064285757	0.9950121443226099	1	0.08718937446443874	99.32027189124351	3.6525764895330113	0.9429773490702261	1.1154254479241144	1.0604708596510808	0.9982147707313651	0.9836046803950135	0.574314631577961
193	194ASP	193	0.042650602409638555	0.07433373680468341	6.917233106757297	0.0	1.0057803468208093	0.0	5.938281022604265	0.16839890133078353	0.9974136696199779	12.985972854942485	0.9973043940893105	1	0.08718937446443874	99.32027189124351	3.6525764895330113	0.9429773490702261	1.1154254479241144	1.0604708596510808	0.9982147707313651	0.9836046803950135	0.574314631577961
124	125ASN	124	0.03255230125523012	0.057323244653015	17.113154738104758	0.0	1.0677570093457944	0.0	6.107761330471791	0.16372610943570637	0.9992251999965936	7.194196684446593	0.998746029698283	1	0.08718937446443874	99.32027189124351	3.6525764895330113	0.9429773490702261	1.1154254479241144	1.0604708596510808	0.9982147707313651	0.9836046803950135	0.574314631577961
192	193LYS	192	0.07909090909090909	0.11045280849470672	39.98400639744102	0.0	1.205	0.0	6.113779633902543	0.1635649401647931	0.9995410203054916	6.399242285262953	0.9994714780378224	1	0.08718937446443874	99.32027189124351	3.6525764895330113	0.9429773490702261	1.1154254479241144	1.0604708596510808	0.9982147707313651	0.9836046803950135	0.574314631577961
128	129ASN	128	0.0592468619246862	0.09044438026276054	49.94002399040384	0.0	1.1945556445156125	0.0	6.494945066321426	0.15396589036377714	0.9998869310432568	6.997073987189904	0.9991985159345681	1	0.08718937446443874	99.32027189124351	3.6525764895330113	0.9429773490702261	1.1154254479241144	1.0604708596510808	0.9982147707313651	0.9836046803950135	0.574314631577961
131	132ILE	131	0.08305699481865285	0.1259738514905481	62.17512994802079	0.0	1.2154340836012862	0.0	6.528720556047046	0.15316936778275458	0.9953724928294712	5.308353160332848	0.99896077837075	1	0.08718937446443874	99.32027189124351	3.6525764895330113	0.9429773490702261	1.1154254479241144	1.0604708596510808	0.9982147707313651	0.9836046803950135	0.574314631577961
40	41PHE	40	0.07494208494208496	0.12001727886015683	43.342662934826066	0.0	1.051660516605166	0.0	6.822604740409453	0.14657158637332782	0.9943070159117438	5.630694343571512	0.9994108245748963	1	0.08718937446443874	99.32027189124351	3.6525764895330113	0.9429773490702261	1.1154254479241144	1.0604708596510808	0.9982147707313651	0.9836046803950135	0.574314631577961
129	130ALA	129	0.06662679425837321	0.08871954332722931	45.821671331467414	0.0	1.1649214659685865	0.0	6.936867505438735	0.1441572870198208	0.9998306661981069	8.572145325265556	0.9997583659872765	1	0.08718937446443874	99.32027189124351	3.6525764895330113	0.9429773490702261	1.1154254479241144	1.0604708596510808	0.9982147707313651	0.9836046803950135	0.574314631577961
37	38ILE	37	0.06854700854700854	0.10060513450784611	59.89604158336665	0.0	1.2570093457943925	0.0	7.250751097133485	0.13791674636236517	0.9995376772723029	7.800092459765665	0.999457452209179	1	0.08718937446443874	99.32027189124351	3.6525764895330113	0.9429773490702261	1.1154254479241144	1.0604708596510808	0.9982147707313651	0.9836046803950135	0.574314631577961
38	39PHE	38	0.04575941676792223	0.06513748768542173	75.12994802079169	0.0	1.444385311335817	0.0	8.779516408383026	0.11390148995509147	0.9997930995435744	10.941162043104956	0.9991392392096359	1	0.08718937446443874	99.32027189124351	3.6525764895330113	0.9429773490702261	1.1154254479241144	1.0604708596510808	0.9982147707313651	0.9836046803950135	0.574314631577961
133	134PHE	133	0.042499999999999996	0.0616705190830806	63.77449020391843	0.0	1.290282131661442	0.0	11.49912804459648	0.0869631154746474	0.9998712991402325	11.500981296937397	0.999743117785345	1	0.08718937446443874	99.32027189124351	3.6525764895330113	0.9429773490702261	1.1154254479241144	1.0604708596510808	0.9982147707313651	0.9836046803950135	0.574314631577961
44	45ASN	44	0.046206896551724136	0.06613537803853278	17.55297880847661	0.0	1.0	0.0	11.606180713708213	0.08616098824128138	0.9991666141929243	11.175568170951165	0.9985791767238948	1	0.08718937446443874	99.32027189124351	3.6525764895330113	0.9429773490702261	1.1154254479241144	1.0604708596510808	0.9982147707313651	0.9836046803950135	0.574314631577961
172	173PHE	172	0.03759776536312849	0.05487757014030054	13.514594162335065	0.0	1.0798816568047338	0.0	11.877200421064947	0.08419492511269225	0.9993954028279779	13.010809597469509	0.9975938796936568	1	0.08718937446443874	99.32027189124351	3.6525764895330113	0.9429773490702261	1.1154254479241144	1.0604708596510808	0.9982147707313651	0.9836046803950135	0.574314631577961
169	170THR	169	0.038571428571428576	0.0591918361717877	5.357856857257097	0.0	1.007462686567164	0.0	14.584634919881994	0.06856530900453223	0.9856720437538786	10.814602995300396	0.998105578783046	1	0.08718937446443874	99.32027189124351	3.6525764895330113	0.9429773490702261	1.1154254479241144	1.0604708596510808	0.9982147707313651	0.9836046803950135	0.574314631577961
174	175ARG	174	0.027222222222222224	0.035577250325745255	9.996001599360255	0.0	1.072	0.0	14.790778072952074	0.06760969538368654	0.9997144537659176	20.82794476893206	0.9895166570578319	1	0.08718937446443874	99.32027189124351	3.6525764895330113	0.9429773490702261	1.1154254479241144	1.0604708596510808	0.9982147707313651	0.9836046803950135	0.574314631577961
102	103LYS	102	0.03914285714285714	0.048542848734549005	6.317473010795681	0.0	1.0063291139240507	0.0	15.888096252673266	0.06294020278431685	0.9989333858713297	15.261444321227973	0.9972794058334967	1	0.08718937446443874	99.32027189124351	3.6525764895330113	0.9429773490702261	1.1154254479241144	1.0604708596510808	0.9982147707313651	0.9836046803950135	0.574314631577961
97	98ASP	97	0.039411764705882354	0.03780298591308148	1.1195521791283487	0.0	1.0	0.0	16.714741308450904	0.05982742906672472	0.9972200722662085	16.214381193060852	0.9958302669648779	1	0.08718937446443874	99.32027189124351	3.6525764895330113	0.9429773490702261	1.1154254479241144	1.0604708596510808	0.9982147707313651	0.9836046803950135	0.574314631577961
168	169ASP	168	0.02978260869565218	0.03566078899092919	2.998800479808077	0.0	1.0266666666666666	0.0	18.886481393752124	0.052947924981453245	0.9992813063752886	18.328383193398757	0.9977436411456567	1	0.08718937446443874	99.32027189124351	3.6525764895330113	0.9429773490702261	1.1154254479241144	1.0604708596510808	0.9982147707313651	0.9836046803950135	0.574314631577961
45	46ALA	45	0.020318021201413426	0.021635543496157168	14.954018392642944	0.0	1.032085561497326	0.0	20.45087248804277	0.048897669308958856	0.9998668597490403	25.653026048370265	0.9988372830082375	1	0.08718937446443874	99.32027189124351	3.6525764895330113	0.9429773490702261	1.1154254479241144	1.0604708596510808	0.9982147707313651	0.9836046803950135	0.574314631577961
125	126THR	125	0.03465753424657533	0.0374988167282718	30.267892842862853	0.0	1.141347424042272	0.0	20.468430765452556	0.04885572379529164	0.999916209492345	23.683386975185176	0.999878132889202	1	0.08718937446443874	99.32027189124351	3.6525764895330113	0.9429773490702261	1.1154254479241144	1.0604708596510808	0.9982147707313651	0.9836046803950135	0.574314631577961
86	87LEU	86	0.028198757763975155	0.0367277747685677	10.51579368252699	0.0	1.015209125475285	0.0	20.494428394149345	0.04879374924579382	0.9997903191532799	20.721673154855157	0.9975498105149159	1	0.08718937446443874	99.32027189124351	3.6525764895330113	0.9429773490702261	1.1154254479241144	1.0604708596510808	0.9982147707313651	0.9836046803950135	0.574314631577961
41	42ILE	41	0.0314003294892916	0.045847496647260864	38.784486205517794	0.0	1.1164948453608248	0.0	20.878550049874413	0.04789604630643473	0.9801257372990828	12.841226692887028	0.9995006766254122	1	0.08718937446443874	99.32027189124351	3.6525764895330113	0.9429773490702261	1.1154254479241144	1.0604708596510808	0.9982147707313651	0.9836046803950135	0.574314631577961
87	88ILE	87	0.027114427860696524	0.042304650142479985	11.635345861655338	0.0	1.013745704467354	0.0	21.152470543950958	0.047275801562856844	0.9665668300431224	13.140299317513785	0.9978424591798214	1	0.08718937446443874	99.32027189124351	3.6525764895330113	0.9429773490702261	1.1154254479241144	1.0604708596510808	0.9982147707313651	0.9836046803950135	0.574314631577961
48	49GLN	48	0.019411764705882358	0.018985212481408907	5.197920831667333	0.0	1.0	0.0	23.292267037661276	0.04293270373309303	0.9994295994596759	40.076612189877835	0.9982850559793924	1	0.08718937446443874	99.32027189124351	3.6525764895330113	0.9429773490702261	1.1154254479241144	1.0604708596510808	0.9982147707313651	0.9836046803950135	0.574314631577961
99	100ASN	99	0.02741935483870968	0.025268588422665987	1.879248300679728	0.0	1.0	0.0	33.75450895025931	0.029625671683554972	0.9995306085806289	27.012262543692124	0.9989684317669898	1	0.08718937446443874	99.32027189124351	3.6525764895330113	0.9429773490702261	1.1154254479241144	1.0604708596510808	0.9982147707313651	0.9836046803950135	0.574314631577961
164	165ASP	164	0.02186046511627907	0.019913278724286183	2.2391043582566974	0.0	1.0	0.0	40.13339472026853	0.024916905409324147	0.9982755696581531	37.74535088077782	0.9974578215303833	1	0.08718937446443874	99.32027189124351	3.6525764895330113	0.9429773490702261	1.1154254479241144	1.0604708596510808	0.9982147707313651	0.9836046803950135	0.574314631577961
160	161ASP	160	0.023846153846153847	0.020206039287021076	1.719312275089964	0.0	1.0	0.0	48.24503769750407	0.020727520336288066	0.9971900469860677	25.433958448172188	0.9968258824090468	1	0.08718937446443874	99.32027189124351	3.6525764895330113	0.9429773490702261	1.1154254479241144	1.0604708596510808	0.9982147707313651	0.9836046803950135	0.574314631577961
134	135LEU	134	0.01903225806451613	0.015450628452237025	25.149940023990403	0.0	1.0810810810810811	0.0	53.30071536755066	0.018761474271108892	0.9999743438417419	59.47119131184053	0.9999511753742734	1	0.08718937446443874	99.32027189124351	3.6525764895330113	0.9429773490702261	1.1154254479241144	1.0604708596510808	0.9982147707313651	0.9836046803950135	0.574314631577961
161	162GLU	161	0.02041666666666667	0.015132516497779067	2.6389444222311074	0.0	1.0	0.0	60.646572567986226	0.01648897798600204	0.9993809671330582	42.496913211994936	0.9993481754065959	1	0.08718937446443874	99.32027189124351	3.6525764895330113	0.9429773490702261	1.1154254479241144	1.0604708596510808	0.9982147707313651	0.9836046803950135	0.574314631577961
83	84SER	83	0.01580645161290323	0.010556818175453918	2.8788484606157536	0.0	1.0138888888888888	0.0	80.47815548788981	0.01242573210006631	0.9995170242247455	72.61909958163434	0.9994832859111339	1	0.08718937446443874	99.32027189124351	3.6525764895330113	0.9429773490702261	1.1154254479241144	1.0604708596510808	0.9982147707313651	0.9836046803950135	0.574314631577961
137	138ILE	137	0.015542168674698795	0.010169607296544265	10.995601759296282	0.0	1.0436363636363637	0.0	80.65909237240773	0.012397858326782822	0.9999707065996377	71.92577707268364	0.999922250618521	1	0.08718937446443874	99.32027189124351	3.6525764895330113	0.9429773490702261	1.1154254479241144	1.0604708596510808	0.9982147707313651	0.9836046803950135	0.574314631577961
1346	1347TYR	1346	0.08776119402985075	0.19793325847998522	43.78248700519792	0.0	1.0858447488584475	0.0	0.4294958625540654	2.3283111368136145	0.9935888922856675	2.435080089875812	0.9952760998334835	8	0.07026615969581751	93.40263894442224	2.506421232876712	1.489659571807231	3.0703247834354794	0.671294313765135	0.9988342225883795	0.9757549517079018	0.5837808764895441
1408	1409TYR	1408	0.05569007263922518	0.16852679089003766	56.21751299480208	0.0	1.1870554765291608	0.0	0.44046496164090443	2.270328146589932	0.978350017297337	2.0331754361706458	0.9771762321356066	8	0.07026615969581751	93.40263894442224	2.506421232876712	1.489659571807231	3.0703247834354794	0.671294313765135	0.9988342225883795	0.9757549517079018	0.5837808764895441
1347	1348LEU	1347	0.14724409448818898	0.2729473923681229	44.422231107556975	0.0	1.0657065706570656	0.0	1.8701109114384558	0.5347276430951456	0.9978914740613191	2.1399645462484655	0.9963668787758955	8	0.07026615969581751	93.40263894442224	2.506421232876712	1.489659571807231	3.0703247834354794	0.671294313765135	0.9988342225883795	0.9757549517079018	0.5837808764895441
1415	1416LYS	1415	0.07886666666666668	0.20511959655013193	58.016793282686926	0.0	1.206064782908339	0.0	2.000689345337487	0.4998277230447862	0.9971915516803331	1.521441742662149	0.9901995628661217	8	0.07026615969581751	93.40263894442224	2.506421232876712	1.489659571807231	3.0703247834354794	0.671294313765135	0.9988342225883795	0.9757549517079018	0.5837808764895441
1345	1346TYR	1345	0.09520661157024794	0.20412319717687316	32.18712514994002	0.0	1.0037267080745342	0.0	2.9002770685489216	0.3447946442235342	0.9987797790276208	2.4830534757922313	0.9959415762457091	8	0.07026615969581751	93.40263894442224	2.506421232876712	1.489659571807231	3.0703247834354794	0.671294313765135	0.9988342225883795	0.9757549517079018	0.5837808764895441
1342	1343LEU	1342	0.1552439024390244	0.24796353788683595	29.588164734106357	0.0	1.0013513513513514	0.0	3.8253745291567816	0.26141231201757065	0.9983333865765422	2.552561306995566	0.997740374147102	8	0.07026615969581751	93.40263894442224	2.506421232876712	1.489659571807231	3.0703247834354794	0.671294313765135	0.9988342225883795	0.9757549517079018	0.5837808764895441
1341	1342LEU	1341	0.1289795918367347	0.16824720512533475	20.35185925629748	0.0	1.0039292730844793	0.0	3.8289006194025306	0.261171573618968	0.9985555633943319	3.3565102829003832	0.9975552115324368	8	0.07026615969581751	93.40263894442224	2.506421232876712	1.489659571807231	3.0703247834354794	0.671294313765135	0.9988342225883795	0.9757549517079018	0.5837808764895441
1411	1412LYS	1411	0.0686909090909091	0.08743056938399703	32.82686925229908	0.0	1.079171741778319	0.0	5.405817838857733	0.18498588554202988	0.9995780456414747	6.491719407122534	0.9994938004544934	8	0.07026615969581751	93.40263894442224	2.506421232876712	1.489659571807231	3.0703247834354794	0.671294313765135	0.9988342225883795	0.9757549517079018	0.5837808764895441
1400	1401LEU	1400	0.05537142857142858	0.05627234068821567	16.193522590963614	0.0	1.0148148148148148	0.0	7.760251875191332	0.12886179676678916	0.9998080620567172	12.1709991741183	0.9996314086187417	8	0.07026615969581751	93.40263894442224	2.506421232876712	1.489659571807231	3.0703247834354794	0.671294313765135	0.9988342225883795	0.9757549517079018	0.5837808764895441
1338	1339ILE	1338	0.07705882352941178	0.08743910936750174	22.031187524990003	0.0	1.0036297640653358	0.0	7.891316624678174	0.12672156593904027	0.9995092014331662	6.447577861652013	0.9992619665781973	8	0.07026615969581751	93.40263894442224	2.506421232876712	1.489659571807231	3.0703247834354794	0.671294313765135	0.9988342225883795	0.9757549517079018	0.5837808764895441
1401	1402PHE	1401	0.032735426008968616	0.0608668591657146	47.62095161935226	0.0	1.18639798488665	0.0	8.186759618289601	0.12214845025691894	0.9994930781829535	8.65616483355647	0.9966120882659325	8	0.07026615969581751	93.40263894442224	2.506421232876712	1.489659571807231	3.0703247834354794	0.671294313765135	0.9988342225883795	0.9757549517079018	0.5837808764895441
1256	1257LYS	1256	0.03577181208053692	0.051268227507394105	12.075169932027189	0.0	1.009933774834437	0.0	8.363110923566163	0.1195727294710548	0.9996180101567177	9.1413015729159	0.9973831894166238	8	0.07026615969581751	93.40263894442224	2.506421232876712	1.489659571807231	3.0703247834354794	0.671294313765135	0.9988342225883795	0.9757549517079018	0.5837808764895441
1412	1413VAL	1412	0.048256410256410254	0.06324989832715774	39.104358256697324	0.0	1.1492842535787322	0.0	9.735317252991896	0.10271878912756295	0.9998256049196574	10.38363354819885	0.999713171938706	8	0.07026615969581751	93.40263894442224	2.506421232876712	1.489659571807231	3.0703247834354794	0.671294313765135	0.9988342225883795	0.9757549517079018	0.5837808764895441
583	584ILE	583	0.016854838709677418	0.022660429325854575	5.917632946821271	0.0	1.0472972972972974	0.0	11.799461266050908	0.08474963199185823	0.998913207634253	28.25970178783323	0.9896653897325146	8	0.07026615969581751	93.40263894442224	2.506421232876712	1.489659571807231	3.0703247834354794	0.671294313765135	0.9988342225883795	0.9757549517079018	0.5837808764895441
1352	1353ILE	1352	0.02965944272445821	0.03465274611501569	23.230707716913233	0.0	1.0602409638554218	0.0	14.554969525715212	0.06870505625128483	0.9994139040428809	18.641325215276545	0.9975390122729483	8	0.07026615969581751	93.40263894442224	2.506421232876712	1.489659571807231	3.0703247834354794	0.671294313765135	0.9988342225883795	0.9757549517079018	0.5837808764895441
1349	1350THR	1349	0.05232558139534884	0.05507586913609342	31.187524990003997	0.0	1.103846153846154	0.0	15.130182010217371	0.06609305818824272	0.9999230409028802	13.470043971142616	0.9997958400610829	8	0.07026615969581751	93.40263894442224	2.506421232876712	1.489659571807231	3.0703247834354794	0.671294313765135	0.9988342225883795	0.9757549517079018	0.5837808764895441
1344	1345THR	1344	0.043333333333333335	0.04784233364802441	0.6397441023590564	0.0	1.0	0.0	17.04487680992466	0.058668655171372874	0.9973720615699818	35.2220218721561	0.9966341441334559	8	0.07026615969581751	93.40263894442224	2.506421232876712	1.489659571807231	3.0703247834354794	0.671294313765135	0.9988342225883795	0.9757549517079018	0.5837808764895441
1356	1357SER	1356	0.040193548387096774	0.04704110718114854	23.390643742503	0.0	1.035897435897436	0.0	17.582512235253503	0.05687469382190833	0.9997372652190889	17.588090858760758	0.9997468983847918	8	0.07026615969581751	93.40263894442224	2.506421232876712	1.489659571807231	3.0703247834354794	0.671294313765135	0.9988342225883795	0.9757549517079018	0.5837808764895441
1397	1398VAL	1397	0.03947169811320755	0.044903503991351464	19.192323070771693	0.0	1.0458333333333334	0.0	19.509582720495732	0.05125686255449498	0.9998941480402688	18.11703870514832	0.99923744392337	8	0.07026615969581751	93.40263894442224	2.506421232876712	1.489659571807231	3.0703247834354794	0.671294313765135	0.9988342225883795	0.9757549517079018	0.5837808764895441
1348	1349ASN	1348	0.03956140350877193	0.04852907160674536	29.068372650939626	0.0	1.0715268225584593	0.0	20.679931281452475	0.0483560601043624	0.99321607557525	13.89362624137162	0.9973247020848952	8	0.07026615969581751	93.40263894442224	2.506421232876712	1.489659571807231	3.0703247834354794	0.671294313765135	0.9988342225883795	0.9757549517079018	0.5837808764895441
1416	1417ASN	1416	0.030024937655860343	0.029573010822974453	29.748100759696122	0.0	1.1021505376344085	0.0	28.935382330257152	0.03455976453279209	0.9998874611147158	24.506800678887604	0.9997931022526647	8	0.07026615969581751	93.40263894442224	2.506421232876712	1.489659571807231	3.0703247834354794	0.671294313765135	0.9988342225883795	0.9757549517079018	0.5837808764895441
1396	1397PHE	1396	0.01636363636363636	0.010244934245076949	1.0795681727309077	0.0	1.0	0.0	33.02182256340182	0.030283004461065178	0.9984108300004165	63.8933113206617	0.9983974122680083	8	0.07026615969581751	93.40263894442224	2.506421232876712	1.489659571807231	3.0703247834354794	0.671294313765135	0.9988342225883795	0.9757549517079018	0.5837808764895441
1393	1394TRP	1393	0.02696428571428572	0.02492271216446262	17.1531387445022	0.0	1.048951048951049	0.0	33.61891745074421	0.029745157662055037	0.9999077508364649	32.68881863003285	0.9998155340263624	8	0.07026615969581751	93.40263894442224	2.506421232876712	1.489659571807231	3.0703247834354794	0.671294313765135	0.9988342225883795	0.9757549517079018	0.5837808764895441
1257	1258ASP	1257	0.02	0.021838568563966754	1.0795681727309077	0.0	1.037037037037037	0.0	34.413634302364216	0.02905825032060912	0.9991946197374185	40.715516002331576	0.9980457601504066	8	0.07026615969581751	93.40263894442224	2.506421232876712	1.489659571807231	3.0703247834354794	0.671294313765135	0.9988342225883795	0.9757549517079018	0.5837808764895441
1413	1414TYR	1413	0.02959227467811159	0.02582636525018842	36.86525389844062	0.0	1.116052060737527	0.0	35.22622278712744	0.02838794286980509	0.9999414171978862	34.1032821407693	0.9998533638131482	8	0.07026615969581751	93.40263894442224	2.506421232876712	1.489659571807231	3.0703247834354794	0.671294313765135	0.9988342225883795	0.9757549517079018	0.5837808764895441
1417	1418PHE	1417	0.020758928571428574	0.014785819422504048	24.830067972810877	0.0	1.0853462157809983	0.0	36.315945155243675	0.027536113839945305	0.9999167527439029	45.6313323021695	0.9998361333158293	8	0.07026615969581751	93.40263894442224	2.506421232876712	1.489659571807231	3.0703247834354794	0.671294313765135	0.9988342225883795	0.9757549517079018	0.5837808764895441
1334	1335VAL	1334	0.025735294117647058	0.0231988110203224	12.714914034386245	0.0	1.0	0.0	41.07531318189718	0.024345523443037864	0.9997391959914933	30.040631557591006	0.9995083762318021	8	0.07026615969581751	93.40263894442224	2.506421232876712	1.489659571807231	3.0703247834354794	0.671294313765135	0.9988342225883795	0.9757549517079018	0.5837808764895441
1409	1410VAL	1409	0.024582338902147973	0.021528795686108746	26.669332267093164	0.0	1.062968515742129	0.0	43.58856535818762	0.02294179658776407	0.9999845991263566	40.125914148413905	0.9998802462404981	8	0.07026615969581751	93.40263894442224	2.506421232876712	1.489659571807231	3.0703247834354794	0.671294313765135	0.9988342225883795	0.9757549517079018	0.5837808764895441
1255	1256ASP	1255	0.024	0.013564659966250538	0.19992003198720512	0.0	1.0	0.0	43.70150585380896	0.02288250668856166	0.9969066366394347	47.66259988439934	0.9913829068837938	8	0.07026615969581751	93.40263894442224	2.506421232876712	1.489659571807231	3.0703247834354794	0.671294313765135	0.9988342225883795	0.9757549517079018	0.5837808764895441
1360	1361ILE	1360	0.024214463840399	0.023937655730451972	21.91123550579768	0.0	1.0894160583941606	0.0	44.50019396407169	0.02247181216350145	0.9958754652807176	25.170260764669358	0.9998988153574452	8	0.07026615969581751	93.40263894442224	2.506421232876712	1.489659571807231	3.0703247834354794	0.671294313765135	0.9988342225883795	0.9757549517079018	0.5837808764895441
1418	1419CYS	1418	0.01611888111888112	0.010997768057410946	13.31467413034786	0.0	1.03003003003003	0.0	79.16628836949302	0.012631639307538299	0.9999810085955945	63.81832141080029	0.9999074077405871	8	0.07026615969581751	93.40263894442224	2.506421232876712	1.489659571807231	3.0703247834354794	0.671294313765135	0.9988342225883795	0.9757549517079018	0.5837808764895441
584	585GLU	584	0.012666666666666663	0.004422166387140533	0.5597760895641744	0.0	1.0714285714285714	0.0	106.02212511841928	0.009431993547413524	0.9993204421408153	136.317966235757	0.9993851395810713	8	0.07026615969581751	93.40263894442224	2.506421232876712	1.489659571807231	3.0703247834354794	0.671294313765135	0.9988342225883795	0.9757549517079018	0.5837808764895441
1259	1260SER	1259	0.012499999999999999	0.004330127018922193	0.5197920831667333	0.0	1.0	0.0	109.61878658451234	0.009122523895382059	0.9994710699157849	120.68162913912242	0.9988423618297173	8	0.07026615969581751	93.40263894442224	2.506421232876712	1.489659571807231	3.0703247834354794	0.671294313765135	0.9988342225883795	0.9757549517079018	0.5837808764895441
1359	1360ILE	1359	0.013461538461538462	0.007307692307692308	1.1195521791283487	0.0	1.0	0.0	112.66223558614006	0.008876088733703612	0.9999127457854301	91.53134817886789	0.9991607156374471	8	0.07026615969581751	93.40263894442224	2.506421232876712	1.489659571807231	3.0703247834354794	0.671294313765135	0.9988342225883795	0.9757549517079018	0.5837808764895441
582	583LEU	582	0.013000000000000001	0.006403124237432849	1.879248300679728	0.0	1.0	0.0	129.70406610866075	0.007709858526426157	0.9999682657350425	101.33581831968522	0.9998682988918024	8	0.07026615969581751	93.40263894442224	2.506421232876712	1.489659571807231	3.0703247834354794	0.671294313765135	0.9988342225883795	0.9757549517079018	0.5837808764895441
1419	1420PRO	1419	0.011439999999999999	0.004327401067615527	5.317872850859656	0.0	1.0	0.0	159.04332321284224	0.006287594976003703	0.9999666227629791	172.83684608398255	0.9998633629010591	8	0.07026615969581751	93.40263894442224	2.506421232876712	1.489659571807231	3.0703247834354794	0.671294313765135	0.9988342225883795	0.9757549517079018	0.5837808764895441
1420	1421GLU	1420	0.01111111111111111	0.0031426968052735444	0.7197121151539384	0.0	1.0	0.0	166.20835448453525	0.006016544734476896	0.999986807094891	187.11975195435312	0.9999690723001061	8	0.07026615969581751	93.40263894442224	2.506421232876712	1.489659571807231	3.0703247834354794	0.671294313765135	0.9988342225883795	0.9757549517079018	0.5837808764895441
581	582SER	581	0.010624999999999999	0.0024206145913796356	0.6397441023590564	0.0	1.0	0.0	215.72532162747842	0.004635524436611261	0.9999993807183911	139.23550008604883	0.6998748829062579	8	0.07026615969581751	93.40263894442224	2.506421232876712	1.489659571807231	3.0703247834354794	0.671294313765135	0.9988342225883795	0.9757549517079018	0.5837808764895441
1258	1259VAL	1258	0.01	0.0	0.03998400639744103	0.0	1.0	0.0	0.0	0.0	-0.00040016006402532334	0.0	-0.00040016006402532334	8	0.07026615969581751	93.40263894442224	2.506421232876712	1.489659571807231	3.0703247834354794	0.671294313765135	0.9988342225883795	0.9757549517079018	0.5837808764895441
1285	1286ILE	1285	0.12029629629629633	0.24468253276058433	39.94402239104358	0.0	1.073073073073073	0.0	0.8096011485885458	1.235176113254526	0.9946482192475155	1.9038550869786648	0.9969521946960016	6	0.07175603217158177	91.08356657337065	1.9872695346795435	1.8432558816621012	2.060509785169926	0.5425182742931381	0.9578088772020653	0.9753564330030434	0.49760948164612506
1048	1049VAL	1048	0.08790209790209791	0.18319561613702054	26.94922031187525	0.0	1.0786350148367954	0.0	2.356473633559542	0.42436290640326935	0.9986140847065514	2.5094637865784906	0.9915885974536469	6	0.07175603217158177	91.08356657337065	1.9872695346795435	1.8432558816621012	2.060509785169926	0.5425182742931381	0.9578088772020653	0.9753564330030434	0.49760948164612506
1281	1282ILE	1281	0.0692156862745098	0.11978482566595465	7.556977209116353	0.0	1.0052910052910053	0.0	2.620917380289348	0.3815457929046205	0.9937199104122297	3.8544773013354843	0.9927301729411896	6	0.07175603217158177	91.08356657337065	1.9872695346795435	1.8432558816621012	2.060509785169926	0.5425182742931381	0.9578088772020653	0.9753564330030434	0.49760948164612506
397	398ILE	397	0.06729281767955803	0.11882419998005651	25.74970011995202	0.0	1.0527950310559007	0.0	3.574137020656758	0.27978781849170603	0.9972392254775627	3.680791039668031	0.9966409564099546	6	0.07175603217158177	91.08356657337065	1.9872695346795435	1.8432558816621012	2.060509785169926	0.5425182742931381	0.9578088772020653	0.9753564330030434	0.49760948164612506
1282	1283ASN	1282	0.12542372881355932	0.1767294401908288	27.588964414234308	0.0	1.0739130434782609	0.0	4.564609492260975	0.21907679105856498	0.999848794680138	3.8871585427788853	0.9990116789460928	6	0.07175603217158177	91.08356657337065	1.9872695346795435	1.8432558816621012	2.060509785169926	0.5425182742931381	0.9578088772020653	0.9753564330030434	0.49760948164612506
1283	1284LYS	1283	0.11138392857142856	0.17355360151507096	54.938024790083965	0.0	1.1695778748180494	0.0	4.714174228230526	0.21212622860045457	0.9926677784049703	3.9003185482241536	0.999299738855572	6	0.07175603217158177	91.08356657337065	1.9872695346795435	1.8432558816621012	2.060509785169926	0.5425182742931381	0.9578088772020653	0.9753564330030434	0.49760948164612506
1284	1285PHE	1284	0.05945945945945945	0.0746141768264691	2.6789284286285486	0.0	1.0	0.0	4.7465583537264	0.21067896473134604	0.995915283011983	11.402786251018092	0.9971758398013225	6	0.07175603217158177	91.08356657337065	1.9872695346795435	1.8432558816621012	2.060509785169926	0.5425182742931381	0.9578088772020653	0.9753564330030434	0.49760948164612506
401	402ILE	401	0.057168674698795184	0.0705046045282814	19.792083166733306	0.0	1.0222222222222221	0.0	5.731216437016524	0.17448302833954146	0.9992590500215984	6.366156830750735	0.9987698265315343	6	0.07175603217158177	91.08356657337065	1.9872695346795435	1.8432558816621012	2.060509785169926	0.5425182742931381	0.9578088772020653	0.9753564330030434	0.49760948164612506
394	395LEU	394	0.04	0.04038873605350878	2.3190723710515795	0.0	1.0	0.0	5.7543676079079225	0.17378104218189902	0.9981332795076366	12.166793102375404	0.9978285774569496	6	0.07175603217158177	91.08356657337065	1.9872695346795435	1.8432558816621012	2.060509785169926	0.5425182742931381	0.9578088772020653	0.9753564330030434	0.49760948164612506
1050	1051GLU	1050	0.06256097560975611	0.10948672907229727	9.236305477808877	0.0	1.0086580086580086	0.0	6.1821081040668995	0.1617571196049047	0.9987271554896664	6.616105453239195	0.9958324753886233	6	0.07175603217158177	91.08356657337065	1.9872695346795435	1.8432558816621012	2.060509785169926	0.5425182742931381	0.9578088772020653	0.9753564330030434	0.49760948164612506
1289	1290LEU	1289	0.06618055555555555	0.0831789948092013	39.30427828868453	0.0	1.118006103763988	0.0	7.651633698138049	0.1306910444815648	0.9997156123065009	8.154361853440527	0.9996415512828623	6	0.07175603217158177	91.08356657337065	1.9872695346795435	1.8432558816621012	2.060509785169926	0.5425182742931381	0.9578088772020653	0.9753564330030434	0.49760948164612506
1286	1287SER	1286	0.09547945205479452	0.11605038776392079	38.62455017992803	0.0	1.113871635610766	0.0	7.859658985429873	0.12723198320102516	0.999933925933394	6.432783440017184	0.9996925477378531	6	0.07175603217158177	91.08356657337065	1.9872695346795435	1.8432558816621012	2.060509785169926	0.5425182742931381	0.9578088772020653	0.9753564330030434	0.49760948164612506
1049	1050GLU	1049	0.045897435897435904	0.06765490419623285	19.11235505797681	0.0	1.0648535564853556	0.0	7.937095471437309	0.12599067298593455	0.9997449267472321	8.338677081984878	0.999312802130271	6	0.07175603217158177	91.08356657337065	1.9872695346795435	1.8432558816621012	2.060509785169926	0.5425182742931381	0.9578088772020653	0.9753564330030434	0.49760948164612506
404	405PHE	404	0.034502529510961215	0.05820644549483236	48.42063174730108	0.0	1.1981833195706029	0.0	8.498843812922974	0.11766306358983128	0.9993265379995322	10.4573082038283	0.9958519611086682	6	0.07175603217158177	91.08356657337065	1.9872695346795435	1.8432558816621012	2.060509785169926	0.5425182742931381	0.9578088772020653	0.9753564330030434	0.49760948164612506
1277	1278PHE	1277	0.04359897172236504	0.06544609508145242	38.62455017992803	0.0	1.1387163561076605	0.0	8.87875726842182	0.11262837464389291	0.999874274382237	10.466462857197646	0.9981895760015886	6	0.07175603217158177	91.08356657337065	1.9872695346795435	1.8432558816621012	2.060509785169926	0.5425182742931381	0.9578088772020653	0.9753564330030434	0.49760948164612506
400	401LEU	400	0.040340909090909094	0.05850502821507123	36.7453018792483	0.0	1.11860718171926	0.0	9.629947349913857	0.10384272765613255	0.9994423252008193	9.635581648025065	0.9993446909644679	6	0.07175603217158177	91.08356657337065	1.9872695346795435	1.8432558816621012	2.060509785169926	0.5425182742931381	0.9578088772020653	0.9753564330030434	0.49760948164612506
1288	1289VAL	1288	0.03553398058252427	0.0420985472465674	6.437425029988005	0.0	1.0	0.0	11.973190091093581	0.08351993014325092	0.9989647707807188	11.471695768712445	0.9984488956008108	6	0.07175603217158177	91.08356657337065	1.9872695346795435	1.8432558816621012	2.060509785169926	0.5425182742931381	0.9578088772020653	0.9753564330030434	0.49760948164612506
405	406MET	405	0.03833333333333334	0.04742755275002739	15.99360255897641	0.0	1.0175	0.0	12.808754590322003	0.07807160274236004	0.9992041653427758	13.330632186663275	0.9981075212181738	6	0.07175603217158177	91.08356657337065	1.9872695346795435	1.8432558816621012	2.060509785169926	0.5425182742931381	0.9578088772020653	0.9753564330030434	0.49760948164612506
1218	1219ILE	1218	0.01900826446280992	0.020826118323536126	6.277489004398241	0.0	1.019108280254777	0.0	19.733638716793113	0.050674891455725846	0.9997460342637786	28.281963107132356	0.9993046014998788	6	0.07175603217158177	91.08356657337065	1.9872695346795435	1.8432558816621012	2.060509785169926	0.5425182742931381	0.9578088772020653	0.9753564330030434	0.49760948164612506
1292	1293LEU	1292	0.029635761589403977	0.03229930051601668	20.31187524990004	0.0	1.0393700787401574	0.0	23.84640391696605	0.04193504410484836	0.9999535429660823	24.698539861173	0.9997999383450022	6	0.07175603217158177	91.08356657337065	1.9872695346795435	1.8432558816621012	2.060509785169926	0.5425182742931381	0.9578088772020653	0.9753564330030434	0.49760948164612506
1214	1215PHE	1214	0.03326424870466321	0.035413436994625964	15.153938424630148	0.0	1.0026385224274406	0.0	25.43565317464606	0.03931489367046361	0.9996552365621367	17.767603732889473	0.9987055355458251	6	0.07175603217158177	91.08356657337065	1.9872695346795435	1.8432558816621012	2.060509785169926	0.5425182742931381	0.9578088772020653	0.9753564330030434	0.49760948164612506
1299	1300PHE	1299	0.013783783783783784	0.007109700777278868	3.398640543782487	0.0	1.0235294117647058	0.0	30.918291088194668	0.032343314096742674	0.999743970394073	97.46230833665794	0.9997241752466248	6	0.07175603217158177	91.08356657337065	1.9872695346795435	1.8432558816621012	2.060509785169926	0.5425182742931381	0.9578088772020653	0.9753564330030434	0.49760948164612506
409	410SER	409	0.011555555555555558	0.004192880503136268	1.919232307077169	0.0	1.0	0.0	31.398468642161404	0.031848686997977174	0.9999936905543211	167.2415087564312	0.9999518214285338	6	0.07175603217158177	91.08356657337065	1.9872695346795435	1.8432558816621012	2.060509785169926	0.5425182742931381	0.9578088772020653	0.9753564330030434	0.49760948164612506
1280	1281ASN	1280	0.02	0.01777046633277277	0.9196321471411435	0.0	1.0	0.0	47.5652829655652	0.021023737012643193	0.999413819691479	41.489026432099266	0.9983923838724091	6	0.07175603217158177	91.08356657337065	1.9872695346795435	1.8432558816621012	2.060509785169926	0.5425182742931381	0.9578088772020653	0.9753564330030434	0.49760948164612506
1275	1276HIS	1275	0.02	0.01	0.07996801279488205	0.0	1.0	0.0	49.55624454398659	0.020179091640255158	0.9927130103904305	35.69128656333083	0.7875473733741656	6	0.07175603217158177	91.08356657337065	1.9872695346795435	1.8432558816621012	2.060509785169926	0.5425182742931381	0.9578088772020653	0.9753564330030434	0.49760948164612506
1217	1218PHE	1217	0.02082474226804124	0.02118500262623964	5.037984806077569	0.0	1.0	0.0	51.633734552751	0.019367183270045316	0.9892313084564356	28.248941211922062	0.9993442986043485	6	0.07175603217158177	91.08356657337065	1.9872695346795435	1.8432558816621012	2.060509785169926	0.5425182742931381	0.9578088772020653	0.9753564330030434	0.49760948164612506
1276	1277ASN	1276	0.016862745098039218	0.01320876062203866	2.279088364654138	0.0	1.0175438596491229	0.0	59.87265549877706	0.016702115375865127	0.9996810971739004	50.858866895822125	0.999318391033037	6	0.07175603217158177	91.08356657337065	1.9872695346795435	1.8432558816621012	2.060509785169926	0.5425182742931381	0.9578088772020653	0.9753564330030434	0.49760948164612506
407	408ILE	407	0.014473684210526317	0.008922455364688772	11.67532986805278	0.0	1.0171232876712328	0.0	68.84532858949495	0.014525313779279268	0.9999946774434388	75.35966542091923	0.9997889326874088	6	0.07175603217158177	91.08356657337065	1.9872695346795435	1.8432558816621012	2.060509785169926	0.5425182742931381	0.9578088772020653	0.9753564330030434	0.49760948164612506
408	409ILE	408	0.0163716814159292	0.011564512921854647	10.475809676129549	0.0	1.0305343511450382	0.0	74.9572865182869	0.013340931168259882	0.9999246699990545	75.61490537854374	0.9998024650779893	6	0.07175603217158177	91.08356657337065	1.9872695346795435	1.8432558816621012	2.060509785169926	0.5425182742931381	0.9578088772020653	0.9753564330030434	0.49760948164612506
412	413TYR	412	0.015402298850574717	0.010372886595566415	3.9584166333466615	0.0	1.0303030303030303	0.0	76.31238527044076	0.013104032804847279	0.9999179099175242	73.75941585748083	0.9998285779548155	6	0.07175603217158177	91.08356657337065	1.9872695346795435	1.8432558816621012	2.060509785169926	0.5425182742931381	0.9578088772020653	0.9753564330030434	0.49760948164612506
456	457PHE	456	0.013846153846153845	0.008355984993230935	0.5997600959616154	0.0	1.0	0.0	92.65165708473566	0.0107931151094841	0.9995433286448098	95.17522074569379	0.9993008676555805	6	0.07175603217158177	91.08356657337065	1.9872695346795435	1.8432558816621012	2.060509785169926	0.5425182742931381	0.9578088772020653	0.9753564330030434	0.49760948164612506
1210	1211ILE	1210	0.012222222222222223	0.006285393610547088	0.39984006397441024	0.0	1.0	0.0	160.17364635384794	0.00624322429290801	0.9971282767982378	40.59526932504811	0.39844398345020055	6	0.07175603217158177	91.08356657337065	1.9872695346795435	1.8432558816621012	2.060509785169926	0.5425182742931381	0.9578088772020653	0.9753564330030434	0.49760948164612506
1215	1216PRO	1215	0.01	0.0	0.19992003198720512	0.0	1.0	0.0	0.0	0.0	-0.00040016006402532334	0.0	-0.00040016006402532334	6	0.07175603217158177	91.08356657337065	1.9872695346795435	1.8432558816621012	2.060509785169926	0.5425182742931381	0.9578088772020653	0.9753564330030434	0.49760948164612506
1221	1222ALA	1221	0.01	0.0	0.23990403838464613	0.0	1.0	0.0	0.0	0.0	-0.00040016006402532334	0.0	-0.00040016006402532334	6	0.07175603217158177	91.08356657337065	1.9872695346795435	1.8432558816621012	2.060509785169926	0.5425182742931381	0.9578088772020653	0.9753564330030434	0.49760948164612506
1273	1274GLY	1273	0.01	0.0	0.03998400639744103	0.0	1.0	0.0	0.0	0.0	-0.00040016006402532334	0.0	-0.00040016006402532334	6	0.07175603217158177	91.08356657337065	1.9872695346795435	1.8432558816621012	2.060509785169926	0.5425182742931381	0.9578088772020653	0.9753564330030434	0.49760948164612506
1274	1275ILE	1274	0.01	0.0	0.11995201919232307	0.0	1.0	0.0	0.0	0.0	-0.00040016006402532334	0.0	-0.00040016006402532334	6	0.07175603217158177	91.08356657337065	1.9872695346795435	1.8432558816621012	2.060509785169926	0.5425182742931381	0.9578088772020653	0.9753564330030434	0.49760948164612506
1295	1296GLY	1295	0.01	0.0	0.11995201919232307	0.0	1.0	0.0	0.0	0.0	-0.00040016006402532334	0.0	-0.00040016006402532334	6	0.07175603217158177	91.08356657337065	1.9872695346795435	1.8432558816621012	2.060509785169926	0.5425182742931381	0.9578088772020653	0.9753564330030434	0.49760948164612506
1043	1044PHE	1043	0.08315436241610738	0.10280683162426675	22.750899640143942	0.0	1.063268892794376	0.0	1.7355726485575795	0.5761787043781151	0.9989096344295564	6.238874385189485	0.9992599105471267	9	0.09834622823984526	99.16033586565374	3.6810483870967743	2.5423775219067686	2.913173520277316	0.39333261538986775	0.9995238455373383	0.9942823238802013	0.4779376127202338
1047	1048LYS	1047	0.15805194805194805	0.2848833844855564	55.13794482207117	0.0	1.1283538796229151	0.0	2.3017161624408935	0.4344584342404466	0.9991258834762173	2.280997815702936	0.9979493658719214	9	0.09834622823984526	99.16033586565374	3.6810483870967743	2.5423775219067686	2.913173520277316	0.39333261538986775	0.9995238455373383	0.9942823238802013	0.4779376127202338
1042	1043ASN	1042	0.07687830687830688	0.1471754918538557	29.868052778888444	0.0	1.0522088353413654	0.0	3.3899986593465337	0.294985367396211	0.9989714514500314	3.8453015783841353	0.9973354361096385	9	0.09834622823984526	99.16033586565374	3.6810483870967743	2.5423775219067686	2.913173520277316	0.39333261538986775	0.9995238455373383	0.9942823238802013	0.4779376127202338
1053	1054PHE	1053	0.037695167286245355	0.08324664396413659	65.33386645341864	0.0	1.3115055079559363	0.0	4.005869335022516	0.24963370403952012	0.9981991920957205	5.1426217486171115	0.9938403153984325	9	0.09834622823984526	99.16033586565374	3.6810483870967743	2.5423775219067686	2.913173520277316	0.39333261538986775	0.9995238455373383	0.9942823238802013	0.4779376127202338
1052	1053PHE	1052	0.051062717770034856	0.08668750942020331	64.53418632546982	0.0	1.3364312267657992	0.0	5.012821473697523	0.19948845280986777	0.999053720991302	7.177393166569263	0.9947818560829298	9	0.09834622823984526	99.16033586565374	3.6810483870967743	2.5423775219067686	2.913173520277316	0.39333261538986775	0.9995238455373383	0.9942823238802013	0.4779376127202338
1037	1038ASN	1037	0.035	0.03370856872716198	10.435825669732107	0.0	1.0114942528735633	0.0	6.8425784275608	0.14614373961314958	0.9987132059652906	9.817017512277065	0.9985407248502763	9	0.09834622823984526	99.16033586565374	3.6810483870967743	2.5423775219067686	2.913173520277316	0.39333261538986775	0.9995238455373383	0.9942823238802013	0.4779376127202338
1044	1045ASP	1044	0.06316129032258065	0.09017012479079022	37.22510995601759	0.0	1.0762620837808807	0.0	7.61273160191056	0.13135889353422509	0.9997822257129066	7.5504045944496365	0.9996621343069323	9	0.09834622823984526	99.16033586565374	3.6810483870967743	2.5423775219067686	2.913173520277316	0.39333261538986775	0.9995238455373383	0.9942823238802013	0.4779376127202338
1051	1052SER	1051	0.05005102040816326	0.06632093775477736	22.391043582566972	0.0	1.0267857142857142	0.0	7.89473113467145	0.1266667582393376	0.9998195884635104	7.897006971262593	0.9968864624362233	9	0.09834622823984526	99.16033586565374	3.6810483870967743	2.5423775219067686	2.913173520277316	0.39333261538986775	0.9995238455373383	0.9942823238802013	0.4779376127202338
1054	1055GLN	1054	0.08585858585858586	0.0890920543227888	16.273490603758496	0.0	1.0049140049140048	0.0	8.227322844163162	0.12154622092038671	0.9996723097089443	8.312197523868733	0.9990780751349918	9	0.09834622823984526	99.16033586565374	3.6810483870967743	2.5423775219067686	2.913173520277316	0.39333261538986775	0.9995238455373383	0.9942823238802013	0.4779376127202338
1057	1058ILE	1057	0.032996845425867505	0.04834657337641512	44.94202319072371	0.0	1.166370106761566	0.0	8.790533118502605	0.11375874324336108	0.999808877840577	11.348566077475839	0.9949205860446838	9	0.09834622823984526	99.16033586565374	3.6810483870967743	2.5423775219067686	2.913173520277316	0.39333261538986775	0.9995238455373383	0.9942823238802013	0.4779376127202338
1059	1060ARG	1059	0.0731060606060606	0.08520740509169948	64.8140743702519	0.0	1.2658852560148057	0.0	10.798263175875173	0.0926074854550813	0.9999145942894891	9.191494302991712	0.9997748941297548	9	0.09834622823984526	99.16033586565374	3.6810483870967743	2.5423775219067686	2.913173520277316	0.39333261538986775	0.9995238455373383	0.9942823238802013	0.4779376127202338
1055	1056LYS	1055	0.0640924092409241	0.07002888165473385	47.14114354258297	0.0	1.1272264631043256	0.0	12.844810500285167	0.07785245255099708	0.9999602767483452	11.59774270392651	0.9998609247148991	9	0.09834622823984526	99.16033586565374	3.6810483870967743	2.5423775219067686	2.913173520277316	0.39333261538986775	0.9995238455373383	0.9942823238802013	0.4779376127202338
1060	1061LYS	1060	0.05111111111111111	0.06289811475319569	74.09036385445822	0.0	1.3718294657312466	0.0	13.574912218863348	0.07366530139402491	0.9999369823915377	13.868851692786151	0.9996212831683291	9	0.09834622823984526	99.16033586565374	3.6810483870967743	2.5423775219067686	2.913173520277316	0.39333261538986775	0.9995238455373383	0.9942823238802013	0.4779376127202338
1062	1063LYS	1062	0.039928571428571424	0.04210100827722756	48.78048780487805	0.0	1.1647540983606557	0.0	17.283069906680723	0.057860091141183935	0.9999832505470487	17.6678758297628	0.9999221181249579	9	0.09834622823984526	99.16033586565374	3.6810483870967743	2.5423775219067686	2.913173520277316	0.39333261538986775	0.9995238455373383	0.9942823238802013	0.4779376127202338
1035	1036SER	1035	0.0325177304964539	0.03687781297589127	20.551779288284685	0.0	1.0700389105058365	0.0	18.059881133607657	0.05537135004388809	0.9997572564044274	22.74753110472779	0.9993261820125058	9	0.09834622823984526	99.16033586565374	3.6810483870967743	2.5423775219067686	2.913173520277316	0.39333261538986775	0.9995238455373383	0.9942823238802013	0.4779376127202338
1056	1057VAL	1056	0.036778523489932886	0.041470753928244	59.21631347461015	0.0	1.2214719783929777	0.0	18.928469936386218	0.05283047194837967	0.9999282945675957	19.736980672887526	0.9996907989633754	9	0.09834622823984526	99.16033586565374	3.6810483870967743	2.5423775219067686	2.913173520277316	0.39333261538986775	0.9995238455373383	0.9942823238802013	0.4779376127202338
1064	1065THR	1064	0.036	0.03787595853960818	13.714514194322271	0.0	1.032069970845481	0.0	19.87480707981711	0.05031495379975291	0.9997402679964742	18.2325127705301	0.9987151438299977	9	0.09834622823984526	99.16033586565374	3.6810483870967743	2.5423775219067686	2.913173520277316	0.39333261538986775	0.9995238455373383	0.9942823238802013	0.4779376127202338
1058	1059SER	1058	0.024603174603174606	0.02428830777727834	3.9584166333466615	0.0	1.0101010101010102	0.0	20.523525073358304	0.04872457321174837	0.9992081243758121	25.720975039711714	0.9983752975787065	9	0.09834622823984526	99.16033586565374	3.6810483870967743	2.5423775219067686	2.913173520277316	0.39333261538986775	0.9995238455373383	0.9942823238802013	0.4779376127202338
1041	1042PHE	1041	0.040102564102564096	0.04158389411581886	20.111955217912836	0.0	1.0576540755467196	0.0	20.861911723256288	0.047934245589066865	0.9998441336185175	20.005405154597153	0.9995206291664346	9	0.09834622823984526	99.16033586565374	3.6810483870967743	2.5423775219067686	2.913173520277316	0.39333261538986775	0.9995238455373383	0.9942823238802013	0.4779376127202338
1063	1064SER	1063	0.03758793969849245	0.03979483887745741	32.66693322670932	0.0	1.0526315789473684	0.0	22.448886663460872	0.04454563894376369	0.999165959298219	10.370418920079068	0.9981346995852522	9	0.09834622823984526	99.16033586565374	3.6810483870967743	2.5423775219067686	2.913173520277316	0.39333261538986775	0.9995238455373383	0.9942823238802013	0.4779376127202338
1061	1062TYR	1061	0.03976950354609929	0.03952892009487495	51.019592163134746	0.0	1.2100313479623825	0.0	23.670707422279136	0.04224630815464302	0.9999335941796476	22.083220117296694	0.9998260868234168	9	0.09834622823984526	99.16033586565374	3.6810483870967743	2.5423775219067686	2.913173520277316	0.39333261538986775	0.9995238455373383	0.9942823238802013	0.4779376127202338
1136	1137ARG	1136	0.02772151898734178	0.02814741335727558	4.598160735705718	0.0	1.0	0.0	31.22142112734923	0.03202929155342078	0.9996382309119042	31.06705419970843	0.9994528479432254	9	0.09834622823984526	99.16033586565374	3.6810483870967743	2.5423775219067686	2.913173520277316	0.39333261538986775	0.9995238455373383	0.9942823238802013	0.4779376127202338
1133	1134ARG	1133	0.02297872340425532	0.022565733164777082	10.395841663334666	0.0	1.0153846153846153	0.0	34.122807546564275	0.029305912142058986	0.9998295699783506	36.24708256514964	0.9995288011763798	9	0.09834622823984526	99.16033586565374	3.6810483870967743	2.5423775219067686	2.913173520277316	0.39333261538986775	0.9995238455373383	0.9942823238802013	0.4779376127202338
1034	1035LYS	1034	0.019312977099236642	0.017742468123300822	7.0371851259496205	0.0	1.0170454545454546	0.0	34.23437884574845	0.029210402925835162	0.9998066600993551	38.050674801636106	0.9978595984045766	9	0.09834622823984526	99.16033586565374	3.6810483870967743	2.5423775219067686	2.913173520277316	0.39333261538986775	0.9995238455373383	0.9942823238802013	0.4779376127202338
1065	1066ASP	1065	0.029859154929577466	0.027179267043692237	19.192323070771693	0.0	1.0291666666666666	0.0	34.810264876438325	0.028727158599613528	0.999788905321877	19.766759460407233	0.9994660242476833	9	0.09834622823984526	99.16033586565374	3.6810483870967743	2.5423775219067686	2.913173520277316	0.39333261538986775	0.9995238455373383	0.9942823238802013	0.4779376127202338
1036	1037LEU	1036	0.023636363636363636	0.01431637795274875	0.6397441023590564	0.0	1.0	0.0	39.154456487039084	0.025539876931531924	0.9971196932368804	39.51306504813286	0.9939504773551489	9	0.09834622823984526	99.16033586565374	3.6810483870967743	2.5423775219067686	2.913173520277316	0.39333261538986775	0.9995238455373383	0.9942823238802013	0.4779376127202338
1066	1067SER	1066	0.024059405940594067	0.02116312025796371	5.957616953218713	0.0	1.0	0.0	42.740423551903	0.023397054050847736	0.9999009641459363	37.39779223002718	0.9993153151072496	9	0.09834622823984526	99.16033586565374	3.6810483870967743	2.5423775219067686	2.913173520277316	0.39333261538986775	0.9995238455373383	0.9942823238802013	0.4779376127202338
1102	1103ARG	1102	0.015454545454545453	0.014373989364401723	0.4398240703718513	0.0	1.0	0.0	44.66786045063691	0.02238746136285427	0.9967561232530276	52.52724121757534	0.9932805081178028	9	0.09834622823984526	99.16033586565374	3.6810483870967743	2.5423775219067686	2.913173520277316	0.39333261538986775	0.9995238455373383	0.9942823238802013	0.4779376127202338
1038	1039LEU	1038	0.02032258064516129	0.0175027870532265	1.879248300679728	0.0	1.0	0.0	46.666780030455406	0.02142851937389693	0.9989561875038353	46.62482152861562	0.9966949288298629	9	0.09834622823984526	99.16033586565374	3.6810483870967743	2.5423775219067686	2.913173520277316	0.39333261538986775	0.9995238455373383	0.9942823238802013	0.4779376127202338
1040	1041HIS	1040	0.017083333333333336	0.014135996211406144	2.6389444222311074	0.0	1.0	0.0	47.92618031172195	0.02086542247881617	0.9996644762014555	54.11718410501864	0.9987671997324465	9	0.09834622823984526	99.16033586565374	3.6810483870967743	2.5423775219067686	2.913173520277316	0.39333261538986775	0.9995238455373383	0.9942823238802013	0.4779376127202338
1069	1070LEU	1069	0.012000000000000004	0.004760952285695233	1.2395041983206718	0.0	1.032258064516129	0.0	53.126693074532675	0.018822929531809494	0.9999878068964818	142.16614095356675	0.9998798373273546	9	0.09834622823984526	99.16033586565374	3.6810483870967743	2.5423775219067686	2.913173520277316	0.39333261538986775	0.9995238455373383	0.9942823238802013	0.4779376127202338
1068	1069ALA	1068	0.02	0.00816496580927726	0.1599360255897641	0.0	1.0	0.0	53.366798224316724	0.01873824237678076	0.9943808754550171	57.20396689350049	0.990654842888072	9	0.09834622823984526	99.16033586565374	3.6810483870967743	2.5423775219067686	2.913173520277316	0.39333261538986775	0.9995238455373383	0.9942823238802013	0.4779376127202338
1033	1034GLU	1033	0.01781818181818182	0.013576839783705068	2.5989604158336665	0.0	1.0153846153846153	0.0	57.545511229459954	0.01737755002319031	0.9998839156179408	50.86252788121496	0.9994813931438614	9	0.09834622823984526	99.16033586565374	3.6810483870967743	2.5423775219067686	2.913173520277316	0.39333261538986775	0.9995238455373383	0.9942823238802013	0.4779376127202338
1134	1135LEU	1134	0.017464788732394373	0.012415155420303668	3.8784486205517794	0.0	1.0	0.0	70.39778903315583	0.014204991573372024	0.9997820127758182	68.76388304250803	0.9997947453508755	9	0.09834622823984526	99.16033586565374	3.6810483870967743	2.5423775219067686	2.913173520277316	0.39333261538986775	0.9995238455373383	0.9942823238802013	0.4779376127202338
1039	1040LEU	1039	0.014000000000000002	0.008	0.19992003198720512	0.0	1.0	0.0	100.48214581432806	0.009952016767713243	0.9971787937801143	75.93742490281727	0.8962495992891121	9	0.09834622823984526	99.16033586565374	3.6810483870967743	2.5423775219067686	2.913173520277316	0.39333261538986775	0.9995238455373383	0.9942823238802013	0.4779376127202338
1067	1068LEU	1067	0.014096385542168676	0.007610415275833136	3.838464614154338	0.0	1.0104166666666667	0.0	117.53875091229396	0.008507832457282009	0.999905602050232	75.29245392264188	0.999820594026829	9	0.09834622823984526	99.16033586565374	3.6810483870967743	2.5423775219067686	2.913173520277316	0.39333261538986775	0.9995238455373383	0.9942823238802013	0.4779376127202338
1132	1133ASN	1132	0.012	0.004	0.19992003198720512	0.0	1.0	0.0	123.22643475050604	0.008115141868907258	0.9997892498032755	66.58809913251334	0.5992010346964383	9	0.09834622823984526	99.16033586565374	3.6810483870967743	2.5423775219067686	2.913173520277316	0.39333261538986775	0.9995238455373383	0.9942823238802013	0.4779376127202338
1031	1032TYR	1031	0.016	0.008	0.19992003198720512	0.0	1.0	0.0	165.5739050058132	0.006039599053757237	0.9990472434590882	83.5321988645713	0.7952414320538973	9	0.09834622823984526	99.16033586565374	3.6810483870967743	2.5423775219067686	2.913173520277316	0.39333261538986775	0.9995238455373383	0.9942823238802013	0.4779376127202338
1045	1046THR	1045	0.01	0.0	0.3598560575769692	0.0	1.0	0.0	0.0	0.0	-0.00040016006402532334	0.0	-0.00040016006402532334	9	0.09834622823984526	99.16033586565374	3.6810483870967743	2.5423775219067686	2.913173520277316	0.39333261538986775	0.9995238455373383	0.9942823238802013	0.4779376127202338
1098	1099LYS	1098	0.01	0.0	0.07996801279488205	0.0	1.0	0.0	0.0	0.0	-0.00040016006402532334	0.0	-0.00040016006402532334	9	0.09834622823984526	99.16033586565374	3.6810483870967743	2.5423775219067686	2.913173520277316	0.39333261538986775	0.9995238455373383	0.9942823238802013	0.4779376127202338
24	25ARG	24	0.035949612403100774	0.05305830290917442	38.86445421831267	0.0	1.2160493827160495	0.0	7.9572914782998545	0.12567090230728342	0.9991088910529834	9.363798811335572	0.9958638590419344	0	0.0677061310782241	88.28468612554978	2.423460144927536	4.9348996063658825	5.212782440620259	0.20263836749789763	0.9992322475157509	0.9983183701459251	0.4017755311607511
23	24LYS	23	0.04291612903225806	0.05406578488002396	60.69572171131547	0.0	1.4670619235836626	0.0	8.674152317000543	0.11528504036528063	0.9997916034247405	11.508607786381855	0.9990339334184851	0	0.0677061310782241	88.28468612554978	2.423460144927536	4.9348996063658825	5.212782440620259	0.20263836749789763	0.9992322475157509	0.9983183701459251	0.4017755311607511
28	29ASN	28	0.07952380952380952	0.08335101853156585	1.3194722111155537	0.0	1.0	0.0	8.700692728903059	0.11493337727903824	0.9984921708146898	9.996788744265835	0.9967127734440053	0	0.0677061310782241	88.28468612554978	2.423460144927536	4.9348996063658825	5.212782440620259	0.20263836749789763	0.9992322475157509	0.9983183701459251	0.4017755311607511
27	28THR	27	0.07838095238095238	0.09347394655628517	10.59576169532187	0.0	1.030188679245283	0.0	8.864090346431176	0.1128147346109368	0.9996916071462582	6.49149526520453	0.9988011616793493	0	0.0677061310782241	88.28468612554978	2.423460144927536	4.9348996063658825	5.212782440620259	0.20263836749789763	0.9992322475157509	0.9983183701459251	0.4017755311607511
30	31VAL	30	0.04843902439024391	0.07280111523552363	24.63014794082367	0.0	1.0162337662337662	0.0	9.196261588122693	0.10873983851128555	0.9995812508230397	8.927523241104062	0.9974846801674768	0	0.0677061310782241	88.28468612554978	2.423460144927536	4.9348996063658825	5.212782440620259	0.20263836749789763	0.9992322475157509	0.9983183701459251	0.4017755311607511
26	27HIS	26	0.06307692307692307	0.08729125565375645	32.147141143542584	0.0	1.1480099502487562	0.0	9.3339393076642	0.10713590125649188	0.9999056652180566	9.548775975396953	0.9994866911127611	0	0.0677061310782241	88.28468612554978	2.423460144927536	4.9348996063658825	5.212782440620259	0.20263836749789763	0.9992322475157509	0.9983183701459251	0.4017755311607511
25	26ARG	25	0.03868571428571428	0.05613237997477617	11.595361855257897	0.0	1.0862068965517242	0.0	9.81602646430766	0.10187421597080337	0.99958591198463	10.845026805442016	0.9990992306258487	0	0.0677061310782241	88.28468612554978	2.423460144927536	4.9348996063658825	5.212782440620259	0.20263836749789763	0.9992322475157509	0.9983183701459251	0.4017755311607511
36	37THR	36	0.05579804560260586	0.07953200815969146	34.66613354658137	0.0	1.0957324106113033	0.0	11.265345475379164	0.08876780585074268	0.9920880806561684	9.318796060006774	0.9996697237548172	0	0.0677061310782241	88.28468612554978	2.423460144927536	4.9348996063658825	5.212782440620259	0.20263836749789763	0.9992322475157509	0.9983183701459251	0.4017755311607511
195	196GLU	195	0.03957446808510639	0.048463956635856426	2.7988804478208715	0.0	1.0	0.0	12.983705135576303	0.07701961724777058	0.999394998074907	14.732857423403733	0.9963559463548963	0	0.0677061310782241	88.28468612554978	2.423460144927536	4.9348996063658825	5.212782440620259	0.20263836749789763	0.9992322475157509	0.9983183701459251	0.4017755311607511
39	40ASN	39	0.042101694915254236	0.04569971809995548	28.268692522990804	0.0	1.082036775106082	0.0	13.034035870893286	0.07672220714330942	0.999791261269701	14.31690252172326	0.9996732788267704	0	0.0677061310782241	88.28468612554978	2.423460144927536	4.9348996063658825	5.212782440620259	0.20263836749789763	0.9992322475157509	0.9983183701459251	0.4017755311607511
196	197VAL	196	0.07	0.0	0.23990403838464613	0.0	1.0	0.0	17.583514393475816	0.056871452294601575	0.9771998407642095	17.583514393475813	0.9771998407642094	0	0.0677061310782241	88.28468612554978	2.423460144927536	4.9348996063658825	5.212782440620259	0.20263836749789763	0.9992322475157509	0.9983183701459251	0.4017755311607511
9	10VAL	9	0.038	0.02785677655436824	0.3598560575769692	0.0	1.0	0.0	21.04690073845515	0.047512933729614786	0.9948259377905142	22.55215754615123	0.9876557212295971	0	0.0677061310782241	88.28468612554978	2.423460144927536	4.9348996063658825	5.212782440620259	0.20263836749789763	0.9992322475157509	0.9983183701459251	0.4017755311607511
370	371GLU	370	0.023333333333333334	0.03126943839882287	0.4398240703718513	0.0	1.0	0.0	22.541306964999183	0.044362999960594174	0.990567941759287	47.26449253803763	0.893912487887189	0	0.0677061310782241	88.28468612554978	2.423460144927536	4.9348996063658825	5.212782440620259	0.20263836749789763	0.9992322475157509	0.9983183701459251	0.4017755311607511
16	17ILE	16	0.013131868131868132	0.006677350252921679	7.876849260295882	0.0	1.0659898477157361	0.0	37.9279786035569	0.026365760497086433	0.9999491162860673	69.20987712148603	0.9999097929821816	0	0.0677061310782241	88.28468612554978	2.423460144927536	4.9348996063658825	5.212782440620259	0.20263836749789763	0.9992322475157509	0.9983183701459251	0.4017755311607511
13	14GLU	13	0.021111111111111112	0.017916128329552337	0.6397441023590564	0.0	1.0	0.0	42.35375046730914	0.023610659952578526	0.9957713428883073	44.804643831535806	0.9928581975435622	0	0.0677061310782241	88.28468612554978	2.423460144927536	4.9348996063658825	5.212782440620259	0.20263836749789763	0.9992322475157509	0.9983183701459251	0.4017755311607511
21	22VAL	21	0.01951035781544256	0.015037473156429856	27.908836465413835	0.0	1.1074498567335243	0.0	45.80537550783056	0.021831498790552368	0.999990653221099	43.0089419816728	0.999953374901023	0	0.0677061310782241	88.28468612554978	2.423460144927536	4.9348996063658825	5.212782440620259	0.20263836749789763	0.9992322475157509	0.9983183701459251	0.4017755311607511
22	23ASN	22	0.024849187935034805	0.019974763498843983	24.19032387045182	0.0	1.0727272727272728	0.0	47.50562953328184	0.021050136790617895	0.9999722901335447	38.765376210431725	0.9999111715356183	0	0.0677061310782241	88.28468612554978	2.423460144927536	4.9348996063658825	5.212782440620259	0.20263836749789763	0.9992322475157509	0.9983183701459251	0.4017755311607511
273	274PRO	273	0.016666666666666666	0.009428090415820633	0.11995201919232307	0.0	1.0	0.0	61.559804638070574	0.016244366041759134	0.9960427828231881	43.091863246649396	0.6971098999570241	0	0.0677061310782241	88.28468612554978	2.423460144927536	4.9348996063658825	5.212782440620259	0.20263836749789763	0.9992322475157509	0.9983183701459251	0.4017755311607511
20	21GLY	20	0.012631578947368424	0.005469634129164876	3.198720511795282	0.0	1.0125	0.0	70.61857974191135	0.014160579321400754	0.999968109378264	107.81383445183185	0.9998627455777512	0	0.0677061310782241	88.28468612554978	2.423460144927536	4.9348996063658825	5.212782440620259	0.20263836749789763	0.9992322475157509	0.9983183701459251	0.4017755311607511
14	15THR	14	0.015874999999999997	0.010726961747546847	10.875649740103958	0.0	1.0441176470588236	0.0	79.1606240771201	0.012632543157135509	0.999959729048823	77.83349281204389	0.9999125323495532	0	0.0677061310782241	88.28468612554978	2.423460144927536	4.9348996063658825	5.212782440620259	0.20263836749789763	0.9992322475157509	0.9983183701459251	0.4017755311607511
369	370LYS	369	0.01535714285714286	0.010170736332784387	1.1995201919232308	0.0	1.0	0.0	82.12004061902502	0.012177295486728324	0.9997074415957004	71.86876104713023	0.9985297222737142	0	0.0677061310782241	88.28468612554978	2.423460144927536	4.9348996063658825	5.212782440620259	0.20263836749789763	0.9992322475157509	0.9983183701459251	0.4017755311607511
10	11GLU	10	0.01546875	0.009831341385462109	3.1587365053978407	0.0	1.0	0.0	88.689173893033	0.011275333347969714	0.999857923427723	83.44225436421482	0.9997234371475379	0	0.0677061310782241	88.28468612554978	2.423460144927536	4.9348996063658825	5.212782440620259	0.20263836749789763	0.9992322475157509	0.9983183701459251	0.4017755311607511
15	16GLN	15	0.010967741935483874	0.0029565004483586062	1.3194722111155537	0.0	1.0	0.0	177.54520515380122	0.005632368382653504	0.9999935131113755	157.04880839508274	0.8998209283813171	0	0.0677061310782241	88.28468612554978	2.423460144927536	4.9348996063658825	5.212782440620259	0.20263836749789763	0.9992322475157509	0.9983183701459251	0.4017755311607511
19	20ASN	19	0.011379310344827588	0.005067909812654851	2.3190723710515795	0.0	1.0172413793103448	0.0	202.0004644072427	0.0049504836681164835	0.9980460895083505	155.4446529151137	0.8983873717637325	0	0.0677061310782241	88.28468612554978	2.423460144927536	4.9348996063658825	5.212782440620259	0.20263836749789763	0.9992322475157509	0.9983183701459251	0.4017755311607511
0	1MET	0	0.01	0.0	0.03998400639744103	0.0	1.0	0.0	0.0	0.0	-0.00040016006402532334	0.0	-0.00040016006402532334	0	0.0677061310782241	88.28468612554978	2.423460144927536	4.9348996063658825	5.212782440620259	0.20263836749789763	0.9992322475157509	0.9983183701459251	0.4017755311607511
2	3LYS	2	0.01	0.0	0.03998400639744103	0.0	1.0	0.0	0.0	0.0	-0.00040016006402532334	0.0	-0.00040016006402532334	0	0.0677061310782241	88.28468612554978	2.423460144927536	4.9348996063658825	5.212782440620259	0.20263836749789763	0.9992322475157509	0.9983183701459251	0.4017755311607511
17	18SER	17	0.01	0.0	0.19992003198720512	0.0	1.0	0.0	0.0	0.0	-0.00040016006402532334	0.0	-0.00040016006402532334	0	0.0677061310782241	88.28468612554978	2.423460144927536	4.9348996063658825	5.212782440620259	0.20263836749789763	0.9992322475157509	0.9983183701459251	0.4017755311607511
18	19ILE	18	0.01	0.0	0.07996801279488205	0.0	1.0	0.0	0.0	0.0	-0.00040016006402532334	0.0	-0.00040016006402532334	0	0.0677061310782241	88.28468612554978	2.423460144927536	4.9348996063658825	5.212782440620259	0.20263836749789763	0.9992322475157509	0.9983183701459251	0.4017755311607511
272	273LYS	272	0.01	0.0	0.03998400639744103	0.0	1.0	0.0	0.0	0.0	-0.00040016006402532334	0.0	-0.00040016006402532334	0	0.0677061310782241	88.28468612554978	2.423460144927536	4.9348996063658825	5.212782440620259	0.20263836749789763	0.9992322475157509	0.9983183701459251	0.4017755311607511
325	326ASN	325	0.01	0.0	0.07996801279488205	0.0	1.0	0.0	0.0	0.0	-0.00040016006402532334	0.0	-0.00040016006402532334	0	0.0677061310782241	88.28468612554978	2.423460144927536	4.9348996063658825	5.212782440620259	0.20263836749789763	0.9992322475157509	0.9983183701459251	0.4017755311607511
376	377ASN	376	0.01	0.0	0.23990403838464613	0.0	1.0	0.0	0.0	0.0	-0.00040016006402532334	0.0	-0.00040016006402532334	0	0.0677061310782241	88.28468612554978	2.423460144927536	4.9348996063658825	5.212782440620259	0.20263836749789763	0.9992322475157509	0.9983183701459251	0.4017755311607511
1391	1392ARG	1391	0.13	0.14430869689661813	8.59656137544982	0.0	1.0093023255813953	0.0	4.34886896041063	0.22994484522375166	0.9969562483549468	4.36964175352424	0.9962203236758066	11	0.032642487046632127	21.231507397041185	1.073446327683616	5.103118013865563	4.891027800043287	0.19595862711442755	0.9983708438978942	0.9912935381693757	0.7420107276534247
1390	1391LEU	1390	0.041466666666666666	0.09575932794714512	8.59656137544982	0.0	1.0372093023255815	0.0	5.36397173431409	0.18642902116781448	0.9963184715869258	7.348859854104776	0.9928063594699829	11	0.032642487046632127	21.231507397041185	1.073446327683616	5.103118013865563	4.891027800043287	0.19595862711442755	0.9983708438978942	0.9912935381693757	0.7420107276534247
1315	1316THR	1315	0.05205128205128206	0.05383638495023779	4.078368652538985	0.0	1.0	0.0	5.999980279309817	0.16666721446541669	0.9991806043602118	14.543237213953685	0.9988002810689887	11	0.032642487046632127	21.231507397041185	1.073446327683616	5.103118013865563	4.891027800043287	0.19595862711442755	0.9983708438978942	0.9912935381693757	0.7420107276534247
1389	1390SER	1389	0.10190476190476191	0.10349230694294084	5.3978408636545385	0.0	1.0	0.0	6.279185954617361	0.1592563123990071	0.9985454007232409	6.260920963097295	0.9960324014128089	11	0.032642487046632127	21.231507397041185	1.073446327683616	5.103118013865563	4.891027800043287	0.19595862711442755	0.9983708438978942	0.9912935381693757	0.7420107276534247
1388	1389THR	1388	0.07133333333333332	0.06540812046085885	5.7976809276289485	0.0	1.0	0.0	10.232749988823983	0.09772544048199958	0.9990295583302985	10.320189549174238	0.9974864616775763	11	0.032642487046632127	21.231507397041185	1.073446327683616	5.103118013865563	4.891027800043287	0.19595862711442755	0.9983708438978942	0.9912935381693757	0.7420107276534247
1394	1395LEU	1394	0.023689320388349516	0.030655945154643916	6.757297081167533	0.0	1.0059171597633136	0.0	22.716286147454372	0.044021280305630496	0.9989630170827426	24.367171712838747	0.9957095549897426	11	0.032642487046632127	21.231507397041185	1.073446327683616	5.103118013865563	4.891027800043287	0.19595862711442755	0.9983708438978942	0.9912935381693757	0.7420107276534247
1311	1312ILE	1311	0.024	0.029120439557122076	1.5193922431027589	0.0	1.0	0.0	24.339827923925867	0.04108492480413173	0.998853186276382	23.4588363087382	0.9965651948955244	11	0.032642487046632127	21.231507397041185	1.073446327683616	5.103118013865563	4.891027800043287	0.19595862711442755	0.9983708438978942	0.9912935381693757	0.7420107276534247
1314	1315SER	1314	0.022500000000000003	0.020766559657295184	1.799280287884846	0.0	1.0	0.0	24.774162065967257	0.04036463462769218	0.998932528120451	41.58983123100974	0.9976909040950049	11	0.032642487046632127	21.231507397041185	1.073446327683616	5.103118013865563	4.891027800043287	0.19595862711442755	0.9983708438978942	0.9912935381693757	0.7420107276534247
1308	1309TYR	1308	0.036000000000000004	0.020591260281974003	0.5197920831667333	0.0	1.0	0.0	26.55667438209474	0.03765531728905891	0.9964033857932482	31.097285981815435	0.9920945096629415	11	0.032642487046632127	21.231507397041185	1.073446327683616	5.103118013865563	4.891027800043287	0.19595862711442755	0.9983708438978942	0.9912935381693757	0.7420107276534247
1316	1317GLY	1316	0.02375	0.020879116360612585	0.8396641343462615	0.0	1.0	0.0	27.45996228369782	0.03641665599059001	0.9954558153998744	29.326715031732487	0.9936743116029353	11	0.032642487046632127	21.231507397041185	1.073446327683616	5.103118013865563	4.891027800043287	0.19595862711442755	0.9983708438978942	0.9912935381693757	0.7420107276534247
1306	1307LEU	1306	0.019473684210526317	0.01637510440642531	0.9996001599360256	0.0	1.0	0.0	40.86197651387405	0.024472629209712007	0.9988574433269564	51.401226813016606	0.9978993074359848	11	0.032642487046632127	21.231507397041185	1.073446327683616	5.103118013865563	4.891027800043287	0.19595862711442755	0.9983708438978942	0.9912935381693757	0.7420107276534247
1384	1385THR	1384	0.023333333333333334	0.024190601174530268	1.879248300679728	0.0	1.0	0.0	41.49399676285872	0.02409987174084662	0.9929013994095595	31.31077808710533	0.9982116051518103	11	0.032642487046632127	21.231507397041185	1.073446327683616	5.103118013865563	4.891027800043287	0.19595862711442755	0.9983708438978942	0.9912935381693757	0.7420107276534247
1387	1388ALA	1387	0.022127659574468092	0.02324121158199383	2.6789284286285486	0.0	1.0	0.0	43.823278701329684	0.022818922491293605	0.990057621548983	39.64443357856369	0.9991604872806319	11	0.032642487046632127	21.231507397041185	1.073446327683616	5.103118013865563	4.891027800043287	0.19595862711442755	0.9983708438978942	0.9912935381693757	0.7420107276534247
1385	1386LEU	1385	0.025454545454545452	0.018437594842637888	2.3590563774490203	0.0	1.0	0.0	46.80921134183208	0.021363316563856056	0.9994397504474042	38.74385844001665	0.998480064606988	11	0.032642487046632127	21.231507397041185	1.073446327683616	5.103118013865563	4.891027800043287	0.19595862711442755	0.9983708438978942	0.9912935381693757	0.7420107276534247
1363	1364ILE	1363	0.0165	0.013332291625973384	1.839264294282287	0.0	1.0217391304347827	0.0	57.10161488637655	0.01751263956351929	0.9996903905342069	55.36612206315651	0.9992460676537516	11	0.032642487046632127	21.231507397041185	1.073446327683616	5.103118013865563	4.891027800043287	0.19595862711442755	0.9983708438978942	0.9912935381693757	0.7420107276534247
1310	1311ASN	1310	0.01666666666666667	0.012472191289246473	0.39984006397441024	0.0	1.0	0.0	65.15997975318562	0.01534684331990006	0.9983751207395584	64.85838080073668	0.9969047497015392	11	0.032642487046632127	21.231507397041185	1.073446327683616	5.103118013865563	4.891027800043287	0.19595862711442755	0.9983708438978942	0.9912935381693757	0.7420107276534247
1386	1387LEU	1386	0.0175	0.012990381056766582	0.6797281087564974	0.0	1.0	0.0	65.60539795499388	0.015242648184010903	0.9974250646765103	40.813630703587975	0.9974134027645937	11	0.032642487046632127	21.231507397041185	1.073446327683616	5.103118013865563	4.891027800043287	0.19595862711442755	0.9983708438978942	0.9912935381693757	0.7420107276534247
1367	1368ILE	1367	0.014411764705882353	0.010056071174869858	1.5193922431027589	0.0	1.0	0.0	72.72634940655601	0.013750174567539254	0.9995251467608031	70.92086251877569	0.9991236949577272	11	0.032642487046632127	21.231507397041185	1.073446327683616	5.103118013865563	4.891027800043287	0.19595862711442755	0.9983708438978942	0.9912935381693757	0.7420107276534247
1307	1308ALA	1307	0.0175	0.0082915619758885	0.23990403838464613	0.0	1.0	0.0	169.85797789272627	0.005887271309867762	0.9988597615920644	89.69379219834971	0.9919341971370377	11	0.032642487046632127	21.231507397041185	1.073446327683616	5.103118013865563	4.891027800043287	0.19595862711442755	0.9983708438978942	0.9912935381693757	0.7420107276534247
1312	1313PRO	1312	0.01	0.0	0.03998400639744103	0.0	1.0	0.0	0.0	0.0	-0.00040016006402532334	0.0	-0.00040016006402532334	11	0.032642487046632127	21.231507397041185	1.073446327683616	5.103118013865563	4.891027800043287	0.19595862711442755	0.9983708438978942	0.9912935381693757	0.7420107276534247
1317	1318GLU	1317	0.01	0.0	0.03998400639744103	0.0	1.0	0.0	0.0	0.0	-0.00040016006402532334	0.0	-0.00040016006402532334	11	0.032642487046632127	21.231507397041185	1.073446327683616	5.103118013865563	4.891027800043287	0.19595862711442755	0.9983708438978942	0.9912935381693757	0.7420107276534247
1321	1322LEU	1321	0.01	0.0	0.03998400639744103	0.0	1.0	0.0	0.0	0.0	-0.00040016006402532334	0.0	-0.00040016006402532334	11	0.032642487046632127	21.231507397041185	1.073446327683616	5.103118013865563	4.891027800043287	0.19595862711442755	0.9983708438978942	0.9912935381693757	0.7420107276534247
1330	1331LEU	1330	0.01	0.0	0.03998400639744103	0.0	1.0	0.0	0.0	0.0	-0.00040016006402532334	0.0	-0.00040016006402532334	11	0.032642487046632127	21.231507397041185	1.073446327683616	5.103118013865563	4.891027800043287	0.19595862711442755	0.9983708438978942	0.9912935381693757	0.7420107276534247
1383	1384ALA	1383	0.01	0.0	0.07996801279488205	0.0	1.0	0.0	0.0	0.0	-0.00040016006402532334	0.0	-0.00040016006402532334	11	0.032642487046632127	21.231507397041185	1.073446327683616	5.103118013865563	4.891027800043287	0.19595862711442755	0.9983708438978942	0.9912935381693757	0.7420107276534247
1392	1393PHE	1392	0.01	0.0	0.11995201919232307	0.0	1.0	0.0	0.0	0.0	-0.00040016006402532334	0.0	-0.00040016006402532334	11	0.032642487046632127	21.231507397041185	1.073446327683616	5.103118013865563	4.891027800043287	0.19595862711442755	0.9983708438978942	0.9912935381693757	0.7420107276534247
419	420PHE	419	0.03866666666666667	0.06162971866090435	1.879248300679728	0.0	1.0	0.0	10.078343572333317	0.09922265428072542	0.9915532300006683	27.084062317316608	0.992769274090486	7	0.02310344827586208	7.157137145141943	1.011173184357542	14.284710558077744	19.195881513248885	0.07000491861100526	0.9992555190028705	0.9948688614083838	0.8490892617818543
437	438ALA	437	0.032857142857142856	0.019059520091609047	0.47980807676929227	0.0	1.0	0.0	28.01039701856325	0.03570102913347758	0.9941938216083634	28.28772902670327	0.9920087145642068	7	0.02310344827586208	7.157137145141943	1.011173184357542	14.284710558077744	19.195881513248885	0.07000491861100526	0.9992555190028705	0.9948688614083838	0.8490892617818543
421	422LYS	421	0.032857142857142856	0.02519313155506914	1.1595361855257897	0.0	1.0	0.0	32.07751353154497	0.031174486108987272	0.9984907991274549	31.268115941283874	0.9964928231262083	7	0.02310344827586208	7.157137145141943	1.011173184357542	14.284710558077744	19.195881513248885	0.07000491861100526	0.9992555190028705	0.9948688614083838	0.8490892617818543
422	423LYS	422	0.026363636363636367	0.018719327529067274	0.8796481407437026	0.0	1.0	0.0	34.86752417841395	0.02867998298023946	0.9995588006047483	34.98321973352179	0.9965712432404791	7	0.02310344827586208	7.157137145141943	1.011173184357542	14.284710558077744	19.195881513248885	0.07000491861100526	0.9992555190028705	0.9948688614083838	0.8490892617818543
438	439PRO	438	0.024545454545454547	0.02270908363053963	0.8396641343462615	0.0	1.0	0.0	35.683829266962775	0.028023898234650277	0.9980427202784157	39.50525352573858	0.9955211438564167	7	0.02310344827586208	7.157137145141943	1.011173184357542	14.284710558077744	19.195881513248885	0.07000491861100526	0.9992555190028705	0.9948688614083838	0.8490892617818543
436	437LYS	436	0.019230769230769232	0.01268647884805434	0.8396641343462615	0.0	1.0	0.0	40.61756431293059	0.024619890850561175	0.9994942256912652	49.609435552826874	0.9975820223582831	7	0.02310344827586208	7.157137145141943	1.011173184357542	14.284710558077744	19.195881513248885	0.07000491861100526	0.9992555190028705	0.9948688614083838	0.8490892617818543
411	412TYR	411	0.01525641025641026	0.014475829454500776	4.118352658936425	0.0	1.0097087378640777	0.0	41.369361530040976	0.024172478448182846	0.9997260066637501	51.21113494485763	0.9994861169777837	7	0.02310344827586208	7.157137145141943	1.011173184357542	14.284710558077744	19.195881513248885	0.07000491861100526	0.9992555190028705	0.9948688614083838	0.8490892617818543
420	421SER	420	0.025	0.01	0.4398240703718513	0.0	1.0	0.0	43.171074195848696	0.023163658042499192	0.9942086706821073	46.29444515221888	0.9938763013908722	7	0.02310344827586208	7.157137145141943	1.011173184357542	14.284710558077744	19.195881513248885	0.07000491861100526	0.9992555190028705	0.9948688614083838	0.8490892617818543
418	419SER	418	0.02642857142857143	0.02158277847105447	1.0795681727309077	0.0	1.0	0.0	44.50641536863311	0.02246867090322382	0.9993614144244999	28.96236785032702	0.9967351356254234	7	0.02310344827586208	7.157137145141943	1.011173184357542	14.284710558077744	19.195881513248885	0.07000491861100526	0.9992555190028705	0.9948688614083838	0.8490892617818543
416	417ILE	416	0.02	0.012649110640673518	0.23990403838464613	0.0	1.0	0.0	45.98863781145505	0.021744501415758736	0.9961958425447207	39.726190739705146	0.8917816440310078	7	0.02310344827586208	7.157137145141943	1.011173184357542	14.284710558077744	19.195881513248885	0.07000491861100526	0.9992555190028705	0.9948688614083838	0.8490892617818543
439	440ILE	439	0.02043478260869565	0.018052643036544955	1.4394242303078768	0.0	1.0	0.0	46.52875103558434	0.021492087746675558	0.9983776197577144	47.612389079992695	0.9984990693975956	7	0.02310344827586208	7.157137145141943	1.011173184357542	14.284710558077744	19.195881513248885	0.07000491861100526	0.9992555190028705	0.9948688614083838	0.8490892617818543
415	416ILE	415	0.018666666666666665	0.01024152766382481	0.9196321471411435	0.0	1.0	0.0	56.77155114289144	0.01761445618216499	0.9993129250911398	52.69385399686682	0.9975277852995987	7	0.02310344827586208	7.157137145141943	1.011173184357542	14.284710558077744	19.195881513248885	0.07000491861100526	0.9992555190028705	0.9948688614083838	0.8490892617818543
435	436PRO	435	0.015555555555555557	0.009558139185602919	0.47980807676929227	0.0	1.0	0.0	92.65165739482129	0.010793115073361812	0.9992846494413127	82.83624972971715	0.9984014291481135	7	0.02310344827586208	7.157137145141943	1.011173184357542	14.284710558077744	19.195881513248885	0.07000491861100526	0.9992555190028705	0.9948688614083838	0.8490892617818543
414	415ALA	414	0.01	0.0	0.03998400639744103	0.0	1.0	0.0	0.0	0.0	-0.00040016006402532334	0.0	-0.00040016006402532334	7	0.02310344827586208	7.157137145141943	1.011173184357542	14.284710558077744	19.195881513248885	0.07000491861100526	0.9992555190028705	0.9948688614083838	0.8490892617818543
423	424SER	423	0.01	0.0	0.03998400639744103	0.0	1.0	0.0	0.0	0.0	-0.00040016006402532334	0.0	-0.00040016006402532334	7	0.02310344827586208	7.157137145141943	1.011173184357542	14.284710558077744	19.195881513248885	0.07000491861100526	0.9992555190028705	0.9948688614083838	0.8490892617818543
425	426PHE	425	0.01	0.0	0.03998400639744103	0.0	1.0	0.0	0.0	0.0	-0.00040016006402532334	0.0	-0.00040016006402532334	7	0.02310344827586208	7.157137145141943	1.011173184357542	14.284710558077744	19.195881513248885	0.07000491861100526	0.9992555190028705	0.9948688614083838	0.8490892617818543
433	434VAL	433	0.01	0.0	0.07996801279488205	0.0	1.0	0.0	0.0	0.0	-0.00040016006402532334	0.0	-0.00040016006402532334	7	0.02310344827586208	7.157137145141943	1.011173184357542	14.284710558077744	19.195881513248885	0.07000491861100526	0.9992555190028705	0.9948688614083838	0.8490892617818543
74	75ARG	74	0.07166666666666667	0.07514800211730331	1.4394242303078768	0.0	1.0	0.0	7.923308582070226	0.1262099020430575	0.9906509673188484	27.36480942932393	0.9919803367672305	3	0.01847826086956522	6.317473010795681	1.018987341772152	18.206207640364983	12.652405070465335	0.05492632072276821	0.9303155971529191	0.9820521575172547	0.8396007273222351
[truncated: 1,100 more rows]

## Sheet: Replica_4PyLipid_dataset
Columna1	Residue	Residue ID	Duration	Duration std	Occupancy	Occupancy std	Lipid Count	Lipid Count std	Koff	Residence Time	R Squared	Koff Bootstrap avg	R Squared Bootstrap avg	Binding Site ID	Binding Site Duration	Binding Site Occupancy	Binding Site Lipid Count	Binding Site Koff	Binding Site Koff Bootstrap avg	Binding Site Residence Time	Binding Site R Squared	Binding Site R Squared Bootstrap avg	Binding Site Pose RMSD
[truncated: 1,482 more rows]

[truncated: 1 more sheets: Replica_5PyLipid_dataset]
